# Supplementary material for: Machine learning algorithm integrates bulk and single-cell transcriptome sequencing to reveal immune-related personalized therapy prediction features for pancreatic cancer
Source: Aging (Albany NY). 2023 Dec 12;15(23):14109–40. doi: 10.18632/aging.205293 (PMC10756117; doi:10.18632/aging.205293)
Supplement: Supplementary Table 1 [file aging-15-205293-s002.xlsx]

## Sheet: Table S1
Supplementary Table 1. Differential genes between immune_high and immune_low samples.
	logFC	AveExpr	t	P.Value	adj.P.Val	B
CA9	1.38641	6.96079	5.70844	2.64802e-08	2.70215e-07	8.13058
MUC5AC	1.05591	7.32478	3.44437	0.000650444	0.00218335	-1.53575
CTAGE4	1.05548	2.7559	5.31124	2.07013e-07	1.73432e-06	6.1383
SPINK4	1.01311	3.45775	3.07549	0.00228696	0.00645335	-2.69751
SPRR1A	1.00778	3.48343	3.61039	0.00035593	0.00129718	-0.973101
TNNT1	1.00348	4.07981	4.27049	2.58999e-05	0.000131251	1.50166
CALHM3	0.990822	3.07617	4.85847	1.8734e-06	1.26132e-05	4.01455
CLCA1	0.99028	2.45347	3.03992	0.0025662	0.00714645	-2.80302
SERPINB3	0.967333	4.20635	3.06489	0.00236712	0.00664647	-2.72908
SPRR3	0.949886	4.17462	3.09221	0.0021656	0.00615585	-2.64752
CGB5	0.902985	3.27988	3.04757	0.00250363	0.00698708	-2.78043
FABP6	0.897363	3.03888	4.28884	2.39603e-05	0.00012237	1.57574
TMEM238	0.89468	5.07671	8.18775	6.82747e-15	1.74609e-13	22.9805
SLC7A4	0.864206	3.89756	6.32798	8.59092e-10	1.15225e-08	11.4671
HAPLN1	0.863545	3.06126	5.65099	3.59027e-08	3.54745e-07	7.83516
CASP14	0.862459	1.58716	4.22325	3.16098e-05	0.00015668	1.31217
TFF3	0.854343	8.48826	3.31317	0.00103062	0.00325432	-1.96303
GOLT1A	0.840585	5.19441	8.01772	2.1682e-14	5.3057e-13	21.8437
CAPN9	0.830536	5.12474	3.46558	0.000602984	0.00204853	-1.46522
FGG	0.827891	4.71353	2.93899	0.0035378	0.00938794	-3.09609
CACNG6	0.812312	2.04368	3.65527	0.00030122	0.00112319	-0.816824
CKMT1A	0.804407	5.21768	7.289	2.56627e-12	4.99366e-11	17.1547
TM4SF5	0.804101	5.53105	3.77491	0.000191485	0.000757755	-0.391558
CGB3	0.80181	2.02761	3.98371	8.44488e-05	0.000369588	0.380439
SYT8	0.795492	6.53718	3.63973	0.000319202	0.00118066	-0.871143
C11orf86	0.774201	3.05368	3.7674	0.000197076	0.000775849	-0.418615
AMN	0.768955	5.24398	4.77247	2.79737e-06	1.81306e-05	3.62941
SOSTDC1	0.768153	2.92773	3.99907	7.94029e-05	0.000350755	0.438702
ENTPD8	0.767513	4.4866	5.17516	4.07848e-07	3.20975e-06	5.48322
CGB8	0.760037	2.5629	3.71037	0.000244856	0.00093959	-0.622533
CKMT1B	0.7536	5.23028	6.62949	1.4761e-10	2.24745e-09	13.187
CREG2	0.749222	3.65627	5.95645	6.92812e-09	7.90251e-08	9.43354
OVOL2	0.745578	5.19843	8.69175	2.03814e-16	5.97632e-15	26.4388
RNF183	0.739146	3.43971	5.66664	3.30538e-08	3.29511e-07	7.91538
TMEM184A	0.735434	6.20925	8.80265	9.25569e-17	2.80591e-15	27.2169
IGSF9	0.728122	5.23321	5.54274	6.33122e-08	5.92598e-07	7.28509
PLA2G4F	0.727188	3.27595	5.92608	8.18323e-09	9.24119e-08	9.27159
FOXA2	0.725766	5.9665	5.43572	1.10011e-07	9.73445e-07	6.74992
PNCK	0.724207	2.1954	4.18043	3.78082e-05	0.000182568	1.14202
TMEM151A	0.723733	2.85745	4.96341	1.13992e-06	8.09465e-06	4.49243
ALKAL1	0.723564	2.85119	4.5701	7.02566e-06	4.15024e-05	2.74675
ALDH3B2	0.720181	3.4058	4.11342	4.9888e-05	0.000233025	0.878887
SPACA4	0.713105	3.31165	6.07145	3.66725e-09	4.41394e-08	10.0527
NTSR1	0.71279	3.69538	3.45504	0.000626161	0.00211586	-1.50034
MLPH	0.710801	8.4311	6.56088	2.21523e-10	3.27035e-09	12.7903
DMKN	0.70895	6.12819	6.41369	5.23862e-10	7.30871e-09	11.9498
EPN3	0.708424	5.398	6.14773	2.39296e-09	2.96626e-08	10.4685
CACNG4	0.706063	4.21776	3.67269	0.0002822	0.00106251	-0.75569
IRX3	0.697341	3.78593	4.20213	3.4534e-05	0.000168945	1.22808
TMC4	0.694549	8.32587	8.60048	3.88548e-16	1.11811e-14	25.803
RBBP8NL	0.693822	3.8109	6.02023	4.87397e-09	5.73188e-08	9.77574
PITX1	0.691826	5.86102	4.30691	2.21852e-05	0.0001143	1.64903
SPIRE2	0.691154	5.48235	6.35615	7.306e-10	9.94821e-09	11.6252
KLK11	0.689766	6.74104	3.47659	0.000579659	0.00197878	-1.42848
CAPN8	0.685946	8.00068	3.80607	0.00016985	0.000682411	-0.278769
AQP2	0.684359	2.20845	5.62199	4.18299e-08	4.07213e-07	7.68694
ATP6V1FNB	0.683806	4.29799	6.06945	3.70843e-09	4.45719e-08	10.0418
IRX5	0.683555	3.33731	5.39551	1.351e-07	1.17527e-06	6.55108
GJB6	0.6818	3.33937	3.51234	0.000509571	0.00177515	-1.30835
CGB7	0.678668	1.77046	5.06566	6.96873e-07	5.19818e-06	4.96648
CCK	0.67854	2.72569	3.37385	0.000834477	0.00271305	-1.76731
ATG9B	0.675542	3.86764	5.39062	1.38506e-07	1.2006e-06	6.52699
SULT1C2	0.675123	5.94486	3.12252	0.00196063	0.00566121	-2.55624
ALPP	0.674947	2.73724	3.21935	0.00141971	0.00429932	-2.25906
MUC21	0.672264	1.50581	3.525	0.000486722	0.00170393	-1.26555
CAMSAP3	0.671587	6.07166	7.7336	1.44449e-13	3.21549e-12	19.9793
SSTR1	0.670779	4.19254	4.23054	3.06564e-05	0.000152582	1.34129
MB	0.6674	2.70101	3.8345	0.000152143	0.000620949	-0.17511
B3GNT3	0.6657	8.50304	5.83183	1.36628e-08	1.47158e-07	8.77327
ARHGAP40	0.661571	2.49226	3.49478	0.000542949	0.00187263	-1.36751
CELSR3	0.659491	4.96117	6.30261	9.93665e-10	1.31409e-08	11.3252
SLPI	0.657765	10.3619	4.21152	3.32041e-05	0.00016335	1.2654
INHA	0.654754	3.23477	4.36699	1.71459e-05	9.10396e-05	1.89454
DNAJB13	0.654337	2.83713	3.99459	8.08427e-05	0.000356374	0.421705
AGR2	0.654298	10.5027	3.34623	0.000919006	0.00294953	-1.85682
ESRP1	0.65277	8.14248	8.33383	2.49989e-15	6.65347e-14	23.9695
PRR36	0.650287	3.10366	5.80886	1.54662e-08	1.64705e-07	8.6528
GLB1L2	0.649178	5.43428	6.77654	6.12113e-11	9.94289e-10	14.0477
MAPK15	0.646004	4.00352	5.03214	8.19553e-07	6.02861e-06	4.8102
PROC	0.645072	4.07604	5.6157	4.32354e-08	4.19934e-07	7.65488
SNORC	0.644557	3.59238	6.96757	1.91189e-11	3.32469e-10	15.1866
ABHD17C	0.643214	7.69987	5.97472	6.26618e-09	7.21523e-08	9.53124
FAM83E	0.642119	6.8843	4.61536	5.73391e-06	3.44703e-05	2.94124
EFNA3	0.641703	5.03434	4.90247	1.52265e-06	1.04883e-05	4.21387
NOXA1	0.638698	6.15325	5.50562	7.67581e-08	7.02219e-07	7.09849
CCDC183	0.638404	3.41355	6.88098	3.24912e-11	5.47648e-10	14.6675
CITED1	0.637974	1.95918	4.45621	1.16331e-05	6.49306e-05	2.26468
CYP3A5	0.637621	8.27585	4.0501	6.46142e-05	0.000293273	0.633762
RAPGEFL1	0.637278	6.74557	4.50048	9.57381e-06	5.49146e-05	2.4508
PHACTR3	0.63508	4.30392	3.60168	0.000367574	0.00133348	-1.00322
FOXA3	0.635053	6.8651	4.44854	1.20307e-05	6.69329e-05	2.23258
KRTCAP3	0.632773	7.08924	5.44629	1.04204e-07	9.26399e-07	6.80242
BARX2	0.632507	5.13651	4.98502	1.02797e-06	7.37355e-06	4.59196
OTX1	0.632034	2.41873	6.93016	2.40546e-11	4.13229e-10	14.9618
CBLC	0.631917	7.33341	5.8746	1.08355e-08	1.19043e-07	8.99862
NMU	0.630837	5.09712	3.48635	0.00055967	0.00191785	-1.39578
REN	0.630742	1.76062	4.61274	5.80198e-06	3.48672e-05	2.92994
VGLL1	0.627783	3.996	3.07796	0.00226865	0.00640594	-2.69015
UPK3B	0.623697	4.42489	4.04426	6.61629e-05	0.000299287	0.611334
SMIM22	0.623656	7.6227	6.33261	8.36551e-10	1.12557e-08	11.4931
SLC27A2	0.623309	4.46648	5.3458	1.73884e-07	1.48456e-06	6.30693
GPRC5D	0.622757	3.56603	6.03523	4.48525e-09	5.30464e-08	9.85664
WFDC3	0.621655	3.20345	4.23091	3.06093e-05	0.000152392	1.34275
KLK12	0.619094	1.06388	3.88455	0.000125132	0.000524426	0.00910458
KISS1	0.618686	2.20944	3.59857	0.000371826	0.0013466	-1.01398
CDHR5	0.618395	5.9846	3.64119	0.000317472	0.00117605	-0.866053
MUC3A	0.615456	6.22762	3.17016	0.00167434	0.00495743	-2.41109
WFDC2	0.615123	8.30257	3.65258	0.000304265	0.0011328	-0.826248
PTK6	0.613385	7.14435	4.6098	5.87935e-06	3.53197e-05	2.91725
REEP6	0.61206	5.68784	5.49544	8.09031e-08	7.37524e-07	7.04754
RHBDL1	0.611995	3.80374	5.64497	3.70618e-08	3.64552e-07	7.80433
F12	0.61012	4.3915	5.39721	1.33937e-07	1.16575e-06	6.55945
CEACAM1	0.609293	7.39329	5.57921	5.2346e-08	4.97834e-07	7.46946
DNAH2	0.606438	4.31833	5.07591	6.63029e-07	4.97184e-06	5.01447
COL9A1	0.60495	2.72786	4.29781	2.30628e-05	0.00011832	1.61209
TNNI3	0.603911	1.8253	3.80225	0.000172369	0.00069106	-0.29262
PPP1R36	0.603515	4.19155	7.16214	5.71115e-12	1.06153e-10	16.3704
LGALS9C	0.603463	2.06959	4.37892	1.62855e-05	8.72886e-05	1.94363
SPDEF	0.603398	6.3943	3.46219	0.000610353	0.00207056	-1.47654
CATSPERB	0.603096	4.70385	5.669	3.26429e-08	3.25988e-07	7.92751
C9orf152	0.601362	5.78443	3.92247	0.000107765	0.000459552	0.150096
MUC4	0.601216	5.73637	2.95044	0.00341269	0.00908857	-3.0633
GDPD2	0.600243	2.92186	4.29537	2.33036e-05	0.000119375	1.6022
RNF39	0.599959	5.07075	4.9832	1.03697e-06	7.43497e-06	4.58356
MOGAT2	0.599373	2.48134	3.15014	0.00178958	0.00525018	-2.47233
SLC39A4	0.598163	6.3959	4.72003	3.56206e-06	2.24787e-05	3.39751
ALDH3A1	0.597532	4.62471	3.25489	0.00125858	0.00387835	-2.14785
SMN2	0.596935	2.23474	2.98793	0.00303096	0.00820168	-2.95514
GSTO2	0.596557	5.27557	8.42184	1.35762e-15	3.71805e-14	24.5706
PIWIL1	0.596067	2.37731	3.24954	0.00128171	0.0039353	-2.16467
FAM71E1	0.595025	3.13055	7.47936	7.59073e-13	1.57051e-11	18.3499
INPP5J	0.593883	3.5201	7.80407	9.06152e-14	2.07136e-12	20.4376
MUC1	0.592529	9.83223	3.49572	0.0005411	0.00186701	-1.36433
RASSF10	0.592419	3.00248	3.44889	0.000640036	0.00215543	-1.52074
RAB25	0.59141	8.94776	5.85627	1.19692e-08	1.29987e-07	8.90189
ELF5	0.591306	1.98837	3.03807	0.00258152	0.00718677	-2.80847
C11orf53	0.590354	3.49748	3.85077	0.000142806	0.000587212	-0.115447
UGT1A1	0.588932	2.77772	3.97975	8.57976e-05	0.000375009	0.365458
AOC1	0.587834	7.46082	3.369	0.000848787	0.00275273	-1.78309
KCP	0.587142	4.39312	4.47204	1.08522e-05	6.1215e-05	2.33105
FSTL4	0.586898	2.68315	4.12762	4.70551e-05	0.000221007	0.93434
FXYD3	0.586683	9.47345	4.49894	9.63919e-06	5.51965e-05	2.4443
C19orf33	0.58498	9.32861	3.39802	0.000766543	0.00252941	-1.68846
SIM2	0.584895	3.9587	4.14368	4.40364e-05	0.000208035	0.997251
PSORS1C2	0.583565	2.32973	4.7382	3.2767e-06	2.08871e-05	3.47762
TRIM7	0.583159	4.50896	4.87559	1.72859e-06	1.17264e-05	4.09188
VSTM2L	0.583002	6.73239	3.14237	0.00183625	0.00535484	-2.49601
SGK2	0.582619	5.05612	5.84089	1.30093e-08	1.40743e-07	8.8209
RGL3	0.581782	5.60389	5.39307	1.36793e-07	1.18929e-06	6.53903
LDLRAD1	0.581203	2.30754	4.33243	1.9892e-05	0.000103902	1.75295
GALNT12	0.580541	7.24184	6.36653	6.88147e-10	9.42295e-09	11.6836
AKR7A3	0.580508	6.76327	3.44601	0.000646644	0.00217298	-1.5303
BICDL2	0.578311	6.46431	4.77934	2.70979e-06	1.76116e-05	3.65995
NTF4	0.57801	2.38499	4.0826	5.66041e-05	0.000260602	0.759148
ANO7	0.577924	3.63543	4.90403	1.5115e-06	1.04242e-05	4.22094
CFAP65	0.575993	1.87411	5.68826	2.94764e-08	2.97158e-07	8.02653
FEZF1	0.575866	1.6914	3.15963	0.00173411	0.00510949	-2.44337
CRACR2B	0.575576	6.51008	4.60618	5.97576e-06	3.58103e-05	2.90168
RAB17	0.574763	6.2802	6.80272	5.22593e-11	8.55413e-10	14.2024
CTAGE15	0.572264	2.63828	3.78997	0.00018072	0.000720973	-0.337137
KLHDC7A	0.57138	4.3731	4.46853	1.10209e-05	6.19892e-05	2.31632
BLACAT1	0.568815	5.26812	4.21222	3.31061e-05	0.000162962	1.26821
FA2H	0.567812	6.69831	4.2181	3.23001e-05	0.000159688	1.29163
MAGIX	0.566842	4.20907	8.16478	7.98825e-15	2.02468e-13	22.826
SLC6A8	0.566701	7.27039	4.67299	4.41635e-06	2.72529e-05	3.19137
MCIDAS	0.566431	1.76938	6.02356	4.78487e-09	5.63548e-08	9.7937
PRR15L	0.56598	8.70951	4.56734	7.11314e-06	4.19463e-05	2.73491
JPH1	0.565297	4.66621	5.50999	7.50379e-08	6.89644e-07	7.12045
KCTD14	0.565115	5.06355	4.22086	3.19292e-05	0.000158084	1.30261
LRRC31	0.564434	3.7424	3.12332	0.00195548	0.00564813	-2.55382
NPAS1	0.564068	2.397	5.61023	4.44951e-08	4.30938e-07	7.62703
ARFGEF3	0.563465	7.00243	5.61187	4.41144e-08	4.27983e-07	7.63536
TFAP2A	0.563384	4.38864	4.44636	1.21459e-05	6.74169e-05	2.22349
DHRS11	0.563339	4.4983	7.73545	1.42697e-13	3.18067e-12	19.9913
TRIM54	0.563326	4.32895	3.27694	0.00116733	0.00362741	-2.07829
ZIC2	0.562761	1.83432	3.56725	0.000417209	0.00149127	-1.12165
MALL	0.562648	7.01665	4.72843	3.42731e-06	2.17737e-05	3.4345
MAL2	0.561388	9.85529	5.53314	6.65494e-08	6.19828e-07	7.23677
PAK6	0.560859	2.17389	5.27375	2.49876e-07	2.04703e-06	5.9564
PRRG2	0.560407	5.8702	8.48156	8.95127e-16	2.48343e-14	24.9809
TBX6	0.559512	3.94371	5.00758	9.22474e-07	6.70163e-06	4.69624
RCOR2	0.558116	3.795	7.19042	4.78244e-12	8.97737e-11	16.5443
GRB7	0.557961	7.06539	5.50618	7.65346e-08	7.00928e-07	7.10131
HOXB9	0.557577	3.94307	2.9917	0.00299488	0.00812474	-2.94421
SPTBN2	0.55718	7.18701	6.7938	5.5156e-11	9.01094e-10	14.1496
IGSF9B	0.556713	3.95364	5.69629	2.82467e-08	2.85777e-07	8.06789
AP1M2	0.556188	8.48087	7.58107	3.92556e-13	8.24222e-12	18.9973
IRF6	0.555182	8.57252	6.4682	3.81505e-10	5.45689e-09	12.2594
PNMT	0.552702	2.05835	3.60844	0.000358506	0.00130475	-0.979849
ATP6V0A4	0.552701	1.52634	4.02609	7.12108e-05	0.000319126	0.541729
TMEM125	0.551916	6.76302	5.77182	1.88745e-08	1.98148e-07	8.45934
GDF15	0.550075	6.86173	3.39743	0.000768135	0.00253417	-1.69038
ZDHHC11	0.55005	3.11292	5.70956	2.6323e-08	2.69035e-07	8.13636
DKK4	0.549946	2.53545	3.14973	0.00179202	0.00525463	-2.47359
LMTK3	0.547537	4.58046	5.24773	2.84571e-07	2.30572e-06	5.83078
GRHL1	0.547426	5.22004	5.6611	3.40351e-08	3.3771e-07	7.88699
TLCD1	0.547371	5.62096	7.24633	3.36209e-12	6.47554e-11	16.8898
PLXNB3	0.547262	4.9857	4.90966	1.47176e-06	1.01914e-05	4.24657
BAIAP2L2	0.547188	6.52863	3.75909	0.000203443	0.000797409	-0.448506
HR	0.546513	4.76637	4.99165	9.95831e-07	7.17327e-06	4.62254
C1orf210	0.546488	6.36934	6.30943	9.55572e-10	1.27262e-08	11.3633
ABO	0.545714	4.70116	3.75681	0.000205225	0.000803652	-0.456702
PITPNM3	0.545561	4.88582	7.1735	5.31848e-12	9.93972e-11	16.4402
ERICH2	0.54495	3.14138	6.40693	5.44797e-10	7.57593e-09	11.9116
FAM83H	0.544725	7.90374	6.29732	1.02419e-09	1.3534e-08	11.2957
TLE6	0.543212	3.32429	6.05274	4.06977e-09	4.84018e-08	9.95127
VWA5B1	0.543075	2.11125	3.48662	0.000559142	0.00191728	-1.3949
DEGS2	0.541855	5.0106	3.85176	0.000142259	0.0005851	-0.111825
ARMC3	0.541455	2.65662	3.91202	0.000112305	0.000476658	0.111143
CNFN	0.540685	2.80034	4.78368	2.65572e-06	1.73248e-05	3.6793
PTPN3	0.540093	6.77307	8.71217	1.76314e-16	5.18783e-15	26.5817
GRID2IP	0.539519	3.19881	8.345	2.31415e-15	6.1979e-14	24.0455
ROS1	0.539254	3.42749	3.15044	0.00178784	0.00524601	-2.47144
TFCP2L1	0.536693	6.85928	4.6248	5.49481e-06	3.31973e-05	2.98203
TEX45	0.536661	1.2663	5.40719	1.27294e-07	1.11305e-06	6.60868
USP43	0.53589	4.8849	8.80736	8.94937e-17	2.71789e-15	27.2501
CAPN13	0.53582	4.63278	3.9912	8.19505e-05	0.000359951	0.408835
CYP2J2	0.535355	5.09757	5.15232	4.56409e-07	3.55572e-06	5.37465
PRR7	0.535315	3.7809	4.88226	1.67513e-06	1.13864e-05	4.12209
CDC42BPG	0.535055	6.30817	7.92486	4.0493e-14	9.60481e-13	21.2294
CAPS	0.534228	6.73068	5.35834	1.63193e-07	1.39961e-06	6.36831
DACT2	0.534088	4.08839	3.54268	0.000456409	0.00161241	-1.20553
TMEM38A	0.533754	5.3366	5.8991	9.48269e-09	1.05822e-07	9.12827
STX19	0.533373	4.57603	5.12483	5.22305e-07	4.01939e-06	5.24453
DPP10	0.533091	2.2998	3.25217	0.00127029	0.00390666	-2.15641
NR1D1	0.532846	6.49855	5.35806	1.63418e-07	1.40083e-06	6.36697
CIART	0.53236	4.71475	5.53951	6.43827e-08	6.01294e-07	7.26884
CDH16	0.531315	1.3755	3.17225	0.00166275	0.00493172	-2.40469
C1orf226	0.530833	5.12901	5.7279	2.38725e-08	2.45317e-07	8.23122
SULT1C3	0.530615	1.54142	4.54731	7.77819e-06	4.56308e-05	2.6494
RNF208	0.530476	3.95314	5.33928	1.79717e-07	1.52594e-06	6.27502
CCNO	0.530194	4.43118	4.65685	4.75274e-06	2.91384e-05	3.12102
LY6G6C	0.53005	1.09812	4.53208	8.32318e-06	4.84105e-05	2.58463
CYP4F11	0.529663	4.83381	3.38026	0.000815933	0.00266294	-1.74645
EPCAM	0.529626	10.5397	6.06367	3.82974e-09	4.58707e-08	10.0105
SHANK2	0.529282	5.18194	7.88142	5.41463e-14	1.27367e-12	20.9437
FOXA1	0.528962	4.81694	3.78612	0.000183422	0.000729868	-0.351096
SEZ6L2	0.528902	7.74758	6.60043	1.75364e-10	2.63231e-09	13.0186
RHPN1	0.527742	6.05461	5.22701	3.15485e-07	2.53088e-06	5.73116
CHRNA5	0.527503	4.51085	5.987	5.85614e-09	6.77059e-08	9.59709
GABBR2	0.526833	1.24453	4.92837	1.34683e-06	9.40291e-06	4.33191
RASSF7	0.524548	8.19811	5.68297	3.03146e-08	3.05395e-07	7.99932
KCNK1	0.524282	7.5424	5.01185	9.03758e-07	6.58253e-06	4.71598
HNF4A	0.523675	7.00232	4.07709	5.78907e-05	0.000265806	0.73785
GPRC5C	0.523382	7.00308	6.29711	1.02541e-09	1.35398e-08	11.2945
APLN	0.523313	3.77622	3.59768	0.000373046	0.00135073	-1.01704
CYP4F3	0.52279	5.22724	3.66393	0.000291617	0.00109289	-0.78646
SRCIN1	0.521284	3.62072	4.97213	1.09338e-06	7.8031e-06	4.53256
GPR20	0.520873	2.69238	4.35939	1.77173e-05	9.36644e-05	1.86329
MACROD1	0.520788	5.90935	6.20798	1.70326e-09	2.16497e-08	10.7998
ELMO3	0.520619	7.5126	6.4438	4.39786e-10	6.21353e-09	12.1206
CA12	0.520297	6.60179	3.22549	0.00139058	0.00422013	-2.23994
TMEM145	0.51958	2.04753	4.33356	1.97966e-05	0.000103467	1.75753
MISP3	0.519514	4.9098	5.35786	1.63587e-07	1.40087e-06	6.36597
KLF5	0.518858	9.092	4.40195	1.47393e-05	8.00866e-05	2.03878
ELF3	0.5188	9.96328	4.37747	1.63878e-05	8.76164e-05	1.93766
ACP6	0.517884	5.6771	8.20244	6.1745e-15	1.58386e-13	23.0794
EPS8L1	0.517296	7.67004	3.55974	0.000428854	0.00152701	-1.14737
NUP62CL	0.515764	4.5536	6.32295	8.84264e-10	1.18322e-08	11.439
AMH	0.51449	2.38041	3.59515	0.000376549	0.00136197	-1.02578
ITPKA	0.514318	4.59951	3.48317	0.000566105	0.00193756	-1.40643
XK	0.51402	4.63918	4.93397	1.31152e-06	9.17145e-06	4.35747
CYSRT1	0.513994	3.6513	4.34024	1.92373e-05	0.000100978	1.78484
HPDL	0.512568	3.73594	3.97742	8.66012e-05	0.000378133	0.356644
RDH13	0.512444	5.81914	7.69038	1.92007e-13	4.24087e-12	19.6997
ALS2CL	0.512271	7.38379	4.92258	1.38439e-06	9.64933e-06	4.30544
RAP1GAP	0.512154	7.39414	4.17116	3.92938e-05	0.000188777	1.10542
RORC	0.51191	6.00557	4.65301	4.83626e-06	2.95971e-05	3.10433
CXADR	0.511314	7.31698	6.24906	1.3489e-09	1.74322e-08	11.0271
PPDPF	0.510273	9.69076	7.00111	1.55493e-11	2.74038e-10	15.389
MBOAT2	0.510143	7.7526	6.05583	4.00031e-09	4.77427e-08	9.96803
GRHL2	0.509872	6.7349	4.60763	5.93696e-06	3.56029e-05	2.90791
CDS1	0.509744	7.08262	6.82307	4.62023e-11	7.62876e-10	14.3229
PKP3	0.508599	8.33742	4.95032	1.21335e-06	8.56245e-06	4.43234
CRB3	0.506891	6.63931	5.91824	8.54156e-09	9.60756e-08	9.22991
WNK2	0.506493	5.01151	3.28552	0.00113348	0.00353273	-2.05107
BEST4	0.506277	2.60347	4.90085	1.5344e-06	1.05564e-05	4.20648
LMNTD2	0.506161	4.09511	5.45699	9.86337e-08	8.79683e-07	6.85562
ENTPD2	0.50599	5.16763	4.46247	1.13181e-05	6.34013e-05	2.2909
CATSPER2	0.505897	2.12175	5.77521	1.85344e-08	1.95059e-07	8.477
USH1C	0.505761	7.63819	4.08173	5.68037e-05	0.00026138	0.755811
EGLN3	0.505675	7.20289	3.18453	0.00159593	0.00476257	-2.36692
SOWAHB	0.505628	5.30681	6.21419	1.64431e-09	2.09871e-08	10.8341
RAB27B	0.504916	6.8549	4.70385	3.83627e-06	2.40042e-05	3.32638
ZBTB7C	0.504548	5.23484	4.58901	6.45504e-06	3.83581e-05	2.82782
METTL27	0.503184	4.06108	3.81043	0.000167009	0.00067338	-0.262889
KDF1	0.502882	6.1213	7.09602	8.63316e-12	1.56196e-10	15.9654
MYH14	0.502667	8.89597	4.9733	1.0873e-06	7.76311e-06	4.53793
SRPK3	0.502532	2.64335	5.11465	5.48955e-07	4.1941e-06	5.19653
SLC7A11	0.501958	5.91502	4.32717	2.03455e-05	0.000105861	1.73148
OVOL1	0.501814	4.89109	3.79393	0.000177991	0.00071075	-0.322819
ADPRHL1	0.500993	3.98333	6.93402	2.34931e-11	4.044e-10	14.9849
C2CD4D	0.500007	2.18983	5.73465	2.30283e-08	2.37359e-07	8.26618
PARD6B	0.499908	6.33055	6.402	5.60571e-10	7.78891e-09	11.8837
NGEF	0.499461	5.84562	4.85902	1.86856e-06	1.25856e-05	4.01703
P2RX3	0.499369	1.54537	4.94342	1.25387e-06	8.80819e-06	4.40072
RTEL1-TNFRSF6B	0.498734	3.76833	3.72745	0.000229512	0.000887721	-0.561778
ZNF488	0.498522	3.48547	3.95798	9.35906e-05	0.000405527	0.283287
FOXL1	0.498456	6.3065	3.51272	0.00050887	0.00177307	-1.30706
BSPRY	0.498171	6.56747	5.96956	6.44656e-09	7.40288e-08	9.50363
HSF4	0.498134	5.31917	5.32648	1.91715e-07	1.61731e-06	6.21252
STX1A	0.498009	6.54683	5.42192	1.18061e-07	1.03927e-06	6.68155
RNF223	0.497843	2.89223	4.05421	6.35435e-05	0.000288953	0.649587
GALNT3	0.497712	8.15065	5.16874	4.20967e-07	3.30687e-06	5.45266
OMP	0.497506	1.73011	4.90329	1.51678e-06	1.04521e-05	4.21759
SLC25A10	0.496863	5.7802	6.41033	5.34168e-10	7.44639e-09	11.9308
ETV4	0.495319	6.29421	4.5308	8.3706e-06	4.86531e-05	2.5792
PRR15	0.49501	6.79233	4.19905	3.49816e-05	0.000170663	1.21584
BDH1	0.494778	5.1827	6.427	4.84931e-10	6.79343e-09	12.0252
SRMS	0.493846	4.01596	3.27263	0.00118467	0.00367324	-2.09192
KCNH8	0.493845	4.27583	4.76853	2.84875e-06	1.84216e-05	3.61194
CA14	0.493763	2.7215	4.88904	1.62239e-06	1.10633e-05	4.15285
KRTAP5-1	0.493725	2.39476	4.81671	2.27766e-06	1.51077e-05	3.82678
RIPK4	0.493626	6.96937	6.15478	2.29989e-09	2.86133e-08	10.5071
ESRP2	0.49345	6.88099	6.05202	4.08602e-09	4.84934e-08	9.94739
NEBL	0.49259	6.62934	5.64162	3.77225e-08	3.70836e-07	7.78719
SAPCD2	0.492324	5.24516	4.65731	4.74281e-06	2.9088e-05	3.12303
CD164L2	0.49117	1.7993	3.81872	0.000161744	0.000655728	-0.232735
C1orf116	0.490758	8.21063	4.74585	3.16338e-06	2.02787e-05	3.51139
NSUN7	0.490633	4.93894	6.88017	3.26511e-11	5.49255e-10	14.6627
MARVELD2	0.490108	6.3119	7.10055	8.39256e-12	1.52329e-10	15.9931
SHH	0.489139	4.94378	3.14526	0.00181879	0.00531845	-2.48722
HNF1A	0.48855	4.60606	5.47508	8.98674e-08	8.10379e-07	6.94575
CLDN7	0.48851	8.96988	5.80946	1.54166e-08	1.6428e-07	8.65592
C4BPB	0.488496	5.07244	3.32031	0.00100547	0.0031915	-1.94015
BTBD16	0.488351	2.90748	3.70283	0.000251933	0.000963488	-0.649276
ICA1	0.487826	7.40895	8.23939	4.79246e-15	1.24817e-13	23.3288
ARHGEF16	0.48598	7.10405	5.34118	1.77999e-07	1.51362e-06	6.28431
GPT2	0.485786	6.30342	4.2103	3.33739e-05	0.000164021	1.26055
SMPD3	0.485307	5.98637	4.10576	5.14808e-05	0.000239938	0.849083
MYCN	0.484139	2.69883	4.6082	5.92177e-06	3.55369e-05	2.91037
MYRF	0.483923	7.82748	4.92863	1.34518e-06	9.3953e-06	4.33308
PRSS16	0.483841	4.4632	5.38322	1.43821e-07	1.24239e-06	6.49055
EVPL	0.483255	6.98802	3.72601	0.000230762	0.000891747	-0.566881
FAM174B	0.483103	6.54303	5.56885	5.52563e-08	5.2266e-07	7.41701
LSR	0.482967	9.6662	5.48321	8.61783e-08	7.80423e-07	6.98635
SMIM6	0.482406	5.32821	3.88322	0.000125784	0.00052651	0.00420197
SSTR5	0.48239	2.08052	3.03234	0.00262964	0.00729922	-2.82536
RSPH1	0.48238	4.09727	5.27461	2.48803e-07	2.04021e-06	5.96056
PLEKHH1	0.482215	5.80964	6.66412	1.20125e-10	1.86232e-09	13.3884
MEP1B	0.481903	1.94166	3.15715	0.00174844	0.00514638	-2.45094
C1orf53	0.481332	3.83715	5.71772	2.52042e-08	2.58066e-07	8.17852
DCST2	0.48129	2.54283	6.28561	1.09515e-09	1.43603e-08	11.2304
IL1RAPL2	0.481071	2.42311	3.78768	0.000182322	0.000726746	-0.34544
CYP2W1	0.480759	3.28517	3.44138	0.000657405	0.00220262	-1.54566
PTPRH	0.480429	7.63214	4.55566	7.4938e-06	4.40384e-05	2.68503
ONECUT2	0.480332	6.982	3.51375	0.000506989	0.00176724	-1.30361
ESYT3	0.480237	3.80392	7.33561	1.9082e-12	3.77797e-11	17.4453
CEACAM19	0.479717	4.08558	5.31868	1.99399e-07	1.67548e-06	6.17453
TTC22	0.479654	5.6448	6.32891	8.54513e-10	1.14702e-08	11.4724
CNKSR1	0.479625	6.01364	6.4546	4.13e-10	5.87774e-09	12.1819
NECTIN4	0.479618	7.59877	3.22679	0.00138445	0.00420529	-2.23586
GRHL3	0.479275	2.47208	4.82841	2.15664e-06	1.43553e-05	3.87924
PPP1R16A	0.478438	6.53213	5.54241	6.34204e-08	5.93284e-07	7.28344
FUT3	0.477894	7.49356	3.24436	0.00130447	0.0039966	-2.18093
CTSV	0.477799	4.47761	3.95136	9.60928e-05	0.00041584	0.258358
THEM6	0.477624	7.36283	6.30457	9.82573e-10	1.30348e-08	11.3361
UGT1A6	0.477564	3.81466	3.12958	0.00191556	0.00554424	-2.53487
GAL3ST1	0.477233	4.50022	4.16367	4.05364e-05	0.000193791	1.07586
PPFIA4	0.476454	3.57283	4.31656	2.12903e-05	0.000110123	1.68824
CNNM1	0.475718	4.33886	4.49874	9.64776e-06	5.5227e-05	2.44345
C19orf73	0.474631	2.73188	6.00317	5.35622e-09	6.23926e-08	9.68392
GAD1	0.474016	3.4441	4.76491	2.89697e-06	1.86765e-05	3.59583
ASPHD1	0.473259	5.89518	4.43367	1.28386e-05	7.07078e-05	2.17054
DHRS13	0.473042	4.53121	7.89783	4.85221e-14	1.14773e-12	21.0515
SLC2A1	0.472676	9.3963	3.31139	0.00103697	0.00327133	-1.96871
CAPN12	0.472314	4.94716	3.99544	8.05689e-05	0.000355444	0.424914
BAIAP2L1	0.471112	8.43659	5.47313	9.07766e-08	8.16846e-07	6.936
LHB	0.471048	2.45157	3.80595	0.000169927	0.000682559	-0.279196
GLOD5	0.471022	2.39669	4.58681	6.51921e-06	3.87259e-05	2.81835
ADAP1	0.4708	6.75735	3.77418	0.000192022	0.000758941	-0.39419
CYP4F12	0.470474	4.94482	3.45023	0.000636996	0.00214735	-1.51631
EPB41L4B	0.469894	6.33244	3.87204	0.000131421	0.000546605	-0.0371321
STARD10	0.469672	8.09465	5.63358	3.93554e-08	3.85329e-07	7.74608
ALOXE3	0.468834	1.43419	4.16933	3.9595e-05	0.000190063	1.09817
SCX	0.468602	3.47015	3.67451	0.000280277	0.00105644	-0.74928
LEXM	0.467265	1.98665	6.34635	7.72985e-10	1.0475e-08	11.5702
KIAA1549	0.467094	5.28168	6.84012	4.16605e-11	6.93948e-10	14.4242
TMC7	0.466913	5.78702	4.78751	2.60899e-06	1.70527e-05	3.69634
ZNF165	0.466197	4.85845	5.78172	1.7898e-08	1.88711e-07	8.51094
CKB	0.465656	7.56229	4.49931	9.62372e-06	5.51637e-05	2.44584
CRYM	0.465227	2.99219	4.05813	6.25399e-05	0.000285228	0.664666
CNTN3	0.465088	4.13018	3.94179	9.98194e-05	0.000429906	0.222416
SAPCD1	0.46506	2.27926	4.44778	1.20704e-05	6.70854e-05	2.22944
ARHGEF35	0.464364	5.87974	4.69169	4.05558e-06	2.52556e-05	3.27307
FOXO6	0.464039	2.72027	5.50994	7.50591e-08	6.89644e-07	7.12017
REPS2	0.463285	6.63069	5.70842	2.6483e-08	2.70215e-07	8.13047
TMEM190	0.462746	1.22829	4.67089	4.45885e-06	2.74753e-05	3.1822
FAM160A1	0.462576	5.52562	6.28916	1.07312e-09	1.40931e-08	11.2502
PCSK4	0.462434	3.43953	5.11614	5.4498e-07	4.17123e-06	5.20354
ERVMER34-1	0.461841	3.35159	4.82939	2.14681e-06	1.42955e-05	3.88363
TSTD1	0.461813	7.48193	7.03947	1.22663e-11	2.18468e-10	15.6213
PPL	0.461183	8.4425	4.53044	8.38431e-06	4.87161e-05	2.57764
ARHGEF28	0.460686	6.70327	7.23597	3.58944e-12	6.86677e-11	16.8257
PAQR6	0.460427	4.16237	5.09892	5.92785e-07	4.49866e-06	5.12245
EPHA7	0.460412	2.98712	3.0339	0.00261644	0.00726969	-2.82076
OSBP2	0.460343	4.51356	6.66893	1.16726e-10	1.81958e-09	13.4165
TSPAN1	0.459915	9.99629	3.37716	0.000824855	0.00268742	-1.75654
SYT12	0.459377	4.33203	3.49066	0.000551054	0.00189443	-1.38132
LCN12	0.45856	1.86297	4.21834	3.22678e-05	0.000159622	1.29258
LRRC26	0.458253	0.919037	3.37665	0.000826337	0.00269018	-1.75821
C2orf15	0.457556	4.35462	7.77257	1.11655e-13	2.52515e-12	20.2324
KIFC2	0.457516	6.3121	4.98289	1.03853e-06	7.443e-06	4.58212
GTF2H2C	0.457473	1.16876	3.01494	0.00278066	0.00764726	-2.87642
CEP72	0.457335	4.70111	6.68303	1.07307e-10	1.68355e-09	13.4987
PDE11A	0.457102	4.5022	5.49923	7.9334e-08	7.25394e-07	7.06651
TRIB3	0.457011	6.1444	4.55607	7.48012e-06	4.39732e-05	2.68678
ERBB3	0.456979	9.04118	4.41387	1.39951e-05	7.65323e-05	2.08821
B4GALNT3	0.456226	7.14288	4.64432	5.03043e-06	3.0653e-05	3.06661
WIF1	0.455243	1.28016	3.36169	0.00087076	0.00281433	-1.8068
PALM3	0.454903	4.98099	3.01321	0.00279612	0.00768108	-2.88148
SEMA4G	0.454561	6.2807	4.25373	2.78031e-05	0.000139937	1.43419
GPT	0.454504	4.22373	3.4424	0.000655025	0.00219594	-1.54228
EVX1	0.454311	1.27397	2.98712	0.00303883	0.00821904	-2.9575
EPS8L2	0.454051	8.27508	5.96882	6.47295e-09	7.42817e-08	9.49965
TUFT1	0.453564	7.48068	5.92295	8.32474e-09	9.38851e-08	9.25492
CEP170B	0.453338	7.86149	7.11433	7.70166e-12	1.40993e-10	16.0773
UGT1A9	0.453286	2.58329	4.17464	3.87295e-05	0.000186276	1.11916
SERTAD4	0.453205	4.94643	4.93749	1.28971e-06	9.03013e-06	4.3736
PPP1R1C	0.452779	3.31189	5.04055	7.86957e-07	5.80641e-06	4.84931
PLXNA2	0.452192	7.38215	6.28675	1.08804e-09	1.4278e-08	11.2367
DCST1	0.451561	1.0925	5.30547	2.13108e-07	1.77925e-06	6.11024
ACOT11	0.451294	5.26817	6.97254	1.85435e-11	3.23124e-10	15.2166
MEGF10	0.450932	2.70512	4.14507	4.37845e-05	0.00020696	1.0027
SEMA3B	0.450853	7.18851	3.78061	0.000187341	0.000743897	-0.370982
PIP5K1B	0.450318	5.17176	3.25021	0.00127879	0.00392852	-2.16256
C12orf56	0.450022	2.15805	3.03778	0.002584	0.00719131	-2.80934
FAAH	0.449831	6.46538	6.26574	1.22668e-09	1.59618e-08	11.1198
LGALS9B	0.449726	1.75961	3.03525	0.00260514	0.00724302	-2.8168
CFAP46	0.449714	2.60839	3.72709	0.000229826	0.000888732	-0.563061
UNC93A	0.449521	1.58144	3.08109	0.00224567	0.00634526	-2.68081
VWA2	0.449483	6.30889	4.10645	5.1336e-05	0.000239394	0.851755
ARHGEF5	0.449395	6.71622	6.13381	2.5876e-09	3.18894e-08	10.3923
ASCL5	0.449199	2.04404	4.34761	1.8638e-05	9.80745e-05	1.815
PSORS1C1	0.449121	2.94577	3.50803	0.000517581	0.001799	-1.3229
B3GALT5	0.449026	6.23542	3.15816	0.00174261	0.00513276	-2.44787
SAMD13	0.448521	3.77622	4.87234	1.75518e-06	1.18926e-05	4.07721
ARHGAP32	0.4485	7.50623	7.24223	3.45043e-12	6.63066e-11	16.8644
S100A5	0.447635	2.16966	4.26062	2.70053e-05	0.000136447	1.46189
HAS3	0.447434	4.6962	3.45305	0.000630612	0.00212794	-1.50694
C6orf132	0.447208	6.52976	4.41046	1.42043e-05	7.75762e-05	2.07406
ALG1L	0.446731	4.11305	3.36052	0.000874325	0.00282371	-1.81059
OSBPL7	0.446616	6.6491	5.00978	9.12784e-07	6.64258e-06	4.70641
SYTL1	0.446029	6.54647	4.96044	1.15616e-06	8.19281e-06	4.47882
GAREM1	0.445833	6.2205	5.07854	6.5462e-07	4.91963e-06	5.02677
MST1R	0.445208	7.56295	3.41236	0.000728701	0.00241815	-1.64141
MNX1	0.444869	4.50743	4.02267	7.22031e-05	0.000322977	0.528633
SPATA6L	0.444842	4.70907	6.22341	1.56058e-09	2.00157e-08	10.885
MOK	0.444329	5.12113	7.6276	2.8977e-13	6.2185e-12	19.2954
FAM81B	0.444045	2.77861	2.98482	0.00306116	0.00826905	-2.96418
CGN	0.443713	8.39482	4.51501	8.97808e-06	5.18825e-05	2.51221
GOLGA6L9	0.442839	4.63859	8.28726	3.44788e-15	9.10528e-14	23.653
IQGAP3	0.442797	6.32823	3.89453	0.000120321	0.000506384	0.0460871
C3orf52	0.442652	6.04038	5.21532	3.34362e-07	2.66846e-06	5.67503
FHDC1	0.44265	5.63269	5.52769	6.84605e-08	6.35886e-07	7.20933
TMEM270	0.442638	1.20273	3.97561	8.72298e-05	0.000380486	0.349807
TMEM114	0.442109	0.7447	5.09421	6.06547e-07	4.5949e-06	5.10032
SPINT2	0.441663	10.545	5.7591	2.0207e-08	2.10876e-07	8.39309
LDHD	0.441098	5.29542	4.65064	4.88854e-06	2.98847e-05	3.09403
TNNT2	0.440854	2.48241	3.57242	0.000409384	0.00146645	-1.10395
STK31	0.440465	3.58035	4.06781	6.01237e-05	0.000275242	0.701989
CTXN1	0.440401	3.98705	3.76255	0.000200774	0.000788399	-0.43609
ATP2C2	0.440194	5.74826	3.58544	0.000390251	0.00140704	-1.05921
DBNDD1	0.439942	5.19093	4.59119	6.39224e-06	3.80248e-05	2.83718
SYNE4	0.439833	4.47172	3.69116	0.000263265	0.00100075	-0.690554
SFTPD	0.43972	3.25894	4.18975	3.6367e-05	0.000176611	1.17894
MFSD2A	0.439583	5.37269	3.57635	0.000403525	0.00144906	-1.09048
TTC39A	0.439419	6.16559	5.36242	1.5985e-07	1.37232e-06	6.38832
MMEL1	0.439317	3.32917	4.38261	1.60278e-05	8.59616e-05	1.95884
SLC17A9	0.439133	6.18481	3.77954	0.000188117	0.00074663	-0.374869
HID1	0.438708	7.53744	4.45977	1.14531e-05	6.40102e-05	2.27957
ADAMTSL5	0.438687	4.02944	4.32215	2.07876e-05	0.000107818	1.711
MRPS24	0.438615	5.83987	4.89077	1.6092e-06	1.09822e-05	4.1607
HSD11B2	0.438287	6.15834	2.93507	0.00358159	0.00948396	-3.10729
ZDHHC23	0.438282	5.40374	7.88587	5.25606e-14	1.24153e-12	20.9729
NEK2	0.438078	5.37238	4.39827	1.49766e-05	8.10137e-05	2.02355
ANKRD18A	0.437515	4.25518	5.88727	1.01141e-08	1.12133e-07	9.06559
TDRD5	0.437412	3.21796	3.09447	0.00214967	0.00611464	-2.64074
KCNN4	0.437155	8.02792	2.96842	0.00322443	0.00865635	-3.01159
GTF2IRD1	0.436835	6.62107	8.23539	4.92594e-15	1.28097e-13	23.3018
DUSP9	0.436617	1.13082	3.21185	0.00145608	0.00439927	-2.28239
PBK	0.436492	4.66791	3.85735	0.000139188	0.000573581	-0.0912603
TOM1L1	0.435923	6.64376	6.77355	6.23284e-11	1.00954e-09	14.03
ZNF579	0.435766	5.29314	6.31941	9.02418e-10	1.20372e-08	11.4191
TACC2	0.435281	6.24819	6.07593	3.57692e-09	4.31743e-08	10.077
ARHGAP8	0.43525	4.42455	6.3309	8.44834e-10	1.13492e-08	11.4835
KLC3	0.434998	3.27945	3.65125	0.000305772	0.00113742	-0.830879
CHMP4C	0.43482	7.08925	5.36953	1.54183e-07	1.32635e-06	6.42325
VIPR1	0.434783	4.41005	3.86574	0.0001347	0.000558196	-0.0603658
FOXQ1	0.434734	7.39948	3.35789	0.0008824	0.00284493	-1.81912
VSX1	0.434479	1.38719	4.02751	7.08046e-05	0.000317389	0.547144
CCDC187	0.434449	2.74381	4.29076	2.3765e-05	0.000121446	1.58353
CRYBG2	0.434394	5.57665	3.29434	0.00109968	0.00343917	-2.02306
ANKFN1	0.434147	2.93325	3.28295	0.00114355	0.00356187	-2.05925
EVPLL	0.433586	1.22866	4.27124	2.58183e-05	0.000130994	1.50466
CCDC120	0.433507	5.65768	7.78753	1.01118e-13	2.29613e-12	20.3298
GAS2L2	0.432939	1.77218	3.82277	0.000159225	0.000646287	-0.217958
ZNF774	0.432206	3.8438	7.23889	3.52385e-12	6.75649e-11	16.8438
PLS1	0.431842	8.31203	3.82788	0.000156098	0.000635567	-0.199281
PCDH20	0.431562	3.16472	3.43502	0.000672458	0.00225128	-1.56672
KIAA0895	0.430953	5.34776	6.67233	1.14381e-10	1.78629e-09	13.4363
TTC6	0.430914	2.6157	4.35317	1.81973e-05	9.59634e-05	1.83781
ZP3	0.430439	4.15064	4.25762	2.73492e-05	0.000138061	1.44985
RNF224	0.430353	2.06206	4.87161	1.76122e-06	1.1924e-05	4.0739
CHKB-CPT1B	0.430269	2.85132	4.05273	6.39269e-05	0.000290619	0.64389
ZDHHC11B	0.430247	4.02969	4.02957	7.0218e-05	0.000315092	0.555019
MFSD4A	0.430025	5.9279	3.30635	0.00105514	0.00332186	-1.98479
NRTN	0.429706	3.24412	4.27054	2.58946e-05	0.000131251	1.50185
GRAMD2A	0.429055	3.64937	4.40804	1.43544e-05	7.83207e-05	2.06403
SERINC2	0.429046	8.7076	3.68719	0.000267237	0.00101358	-0.704602
HOOK1	0.428797	6.40952	5.84052	1.30355e-08	1.40938e-07	8.81895
CCDC24	0.428478	5.59484	5.80717	1.56082e-08	1.66113e-07	8.64392
EFNA1	0.428321	8.65306	4.36419	1.73545e-05	9.20346e-05	1.88302
VWA7	0.428308	4.76688	4.63609	5.22149e-06	3.16697e-05	3.0309
DMBX1	0.428265	2.48944	2.99199	0.00299214	0.00811989	-2.94337
DNAAF3	0.428012	3.0437	5.07246	6.74251e-07	5.04487e-06	4.99829
CDT1	0.427989	4.88496	4.73308	3.35491e-06	2.13456e-05	3.45499
FSIP2	0.427934	4.82489	5.5964	4.78433e-08	4.61004e-07	7.55667
RECQL4	0.427474	5.22309	4.76528	2.892e-06	1.86586e-05	3.59748
TESC	0.427241	8.54333	3.02866	0.00266092	0.00737402	-2.83618
PRELID2	0.427239	5.58825	6.46344	3.92243e-10	5.59637e-09	12.2323
SLC4A11	0.427224	5.30544	3.25087	0.0012759	0.00392178	-2.16048
ASPG	0.427092	1.22991	4.95651	1.17807e-06	8.33419e-06	4.46075
SH3RF2	0.427051	6.29746	4.19382	3.57543e-05	0.000173835	1.19508
IGSF5	0.426916	2.68475	4.22342	3.1587e-05	0.000156664	1.31285
KSR2	0.426801	3.53949	4.64047	5.11903e-06	3.11371e-05	3.04989
RIMKLA	0.426203	4.11128	5.49586	8.0731e-08	7.36584e-07	7.0496
RPS6KL1	0.426131	4.50231	6.11779	2.83082e-09	3.47609e-08	10.3048
ANO8	0.425819	5.76052	5.71945	2.49734e-08	2.56011e-07	8.18745
IL20RA	0.42566	6.20922	4.77015	2.82751e-06	1.83051e-05	3.61912
C17orf113	0.425468	3.60847	6.51228	2.94803e-10	4.28523e-09	12.5112
CAMK2N1	0.424691	8.63705	5.50569	7.67277e-08	7.02219e-07	7.09887
SPAG4	0.424289	5.35998	4.36484	1.73057e-05	9.18306e-05	1.8857
SMIM5	0.424262	4.7218	4.33052	2.00563e-05	0.000104631	1.74512
ARHGAP39	0.424174	4.93914	5.83564	1.33841e-08	1.4434e-07	8.7933
PLEKHN1	0.423982	4.6463	3.55836	0.000431021	0.00153259	-1.15208
SUSD4	0.423969	5.32547	3.36722	0.000854089	0.00276781	-1.78887
RALGPS1	0.423931	5.73419	5.83113	1.37148e-08	1.47625e-07	8.76958
LPIN3	0.423899	6.59374	6.71432	8.89859e-11	1.4157e-09	13.6818
CELF5	0.423764	1.87515	4.24916	2.83443e-05	0.000142282	1.41586
RP1L1	0.422798	2.49505	3.50591	0.000521571	0.00181124	-1.33006
INAVA	0.421355	7.925	3.34065	0.000937022	0.00300081	-1.87482
HTR1B	0.421042	3.31276	3.62072	0.00034257	0.00125508	-0.937296
SLC29A2	0.420762	5.99787	5.1231	5.26741e-07	4.0462e-06	5.23638
MAP3K9	0.420386	5.52619	6.57118	2.08473e-10	3.09111e-09	12.8496
ZFPM1	0.41963	4.83054	4.20746	3.37735e-05	0.000165625	1.24924
PLEKHA6	0.419504	7.84434	5.0789	6.53462e-07	4.9131e-06	5.02848
GPR35	0.419322	6.47264	3.38296	0.000808236	0.00264289	-1.73765
CREB3L4	0.41914	6.38175	6.44511	4.36448e-10	6.1804e-09	12.128
ANKS4B	0.418754	5.27219	3.0252	0.00269064	0.00743939	-2.84633
TP53AIP1	0.418294	1.31728	5.31791	2.00177e-07	1.68119e-06	6.17076
TSPAN13	0.418127	8.78706	5.7954	1.6629e-08	1.76205e-07	8.58238
TMPRSS5	0.418118	2.94248	4.3198	2.0997e-05	0.000108771	1.70145
SLC45A4	0.418048	6.76183	5.85711	1.19152e-08	1.29483e-07	8.90629
MUC20	0.417988	7.2551	3.01552	0.00277548	0.0076392	-2.87471
ZNF888	0.417862	5.96027	5.04131	7.84068e-07	5.79012e-06	4.85285
TESMIN	0.417732	3.48803	5.63894	3.82583e-08	3.75669e-07	7.77351
EPHX4	0.417281	3.96517	3.51806	0.000499134	0.00174379	-1.28904
KMT5C	0.416153	5.04675	6.15562	2.28903e-09	2.8499e-08	10.5117
PIP5KL1	0.416061	2.47995	4.72292	3.51523e-06	2.22492e-05	3.4102
RNF103-CHMP3	0.415948	2.29701	4.02339	7.19913e-05	0.00032222	0.531413
LAD1	0.415837	9.70573	3.56691	0.000417729	0.00149282	-1.12281
ZNF385C	0.415764	2.87036	6.2928	1.05102e-09	1.38671e-08	11.2705
CCDC85C	0.415578	5.33758	8.53937	5.97151e-16	1.68981e-14	25.3796
TRIP13	0.415514	4.91462	4.43966	1.25068e-05	6.91046e-05	2.19553
ARHGEF38	0.415329	5.57288	3.81467	0.000164293	0.000664953	-0.247457
PLA2G4D	0.415102	1.39152	5.00128	9.50848e-07	6.88717e-06	4.66706
KIAA1522	0.414966	8.45278	5.23284	3.06477e-07	2.46793e-06	5.75914
PABPC1L	0.414612	6.11434	4.77279	2.79316e-06	1.81103e-05	3.63086
HGD	0.414582	5.96064	3.30332	0.00106622	0.00335055	-1.99447
FAM47E	0.41411	3.18581	5.39207	1.37493e-07	1.19364e-06	6.53409
CLDN4	0.414092	10.0083	3.48976	0.000552846	0.00189906	-1.38435
TNNI1	0.413993	4.4135	5.88025	1.05076e-08	1.16267e-07	9.0285
COMTD1	0.413715	6.2111	4.0927	5.43124e-05	0.000251208	0.79832
LPCAT4	0.413233	7.81237	4.04256	6.66192e-05	0.000300688	0.604826
SVOPL	0.412207	1.38339	3.89819	0.0001186	0.000500254	0.05968
HES6	0.412085	5.05993	3.33731	0.000947941	0.00303038	-1.88555
CLDN12	0.411164	7.70477	6.43557	4.61352e-10	6.48448e-09	12.0738
NUDT8	0.410392	4.86134	4.39704	1.50567e-05	8.13691e-05	2.01846
ABHD11	0.410336	7.50166	6.05256	4.07384e-09	4.84131e-08	9.9503
DLX4	0.410212	1.07893	4.84676	1.97922e-06	1.32679e-05	3.96173
TCEA3	0.40985	7.21075	3.54381	0.000454536	0.00160646	-1.20169
BIK	0.409367	6.64609	3.71055	0.000244684	0.000939141	-0.621873
FN3K	0.409017	4.68759	5.73294	2.32393e-08	2.39244e-07	8.25732
RXFP4	0.408721	2.09135	3.55299	0.000439559	0.00155969	-1.1704
SH2D3A	0.407976	6.49652	3.88147	0.000126651	0.000529619	-0.00227725
NUF2	0.407843	4.68931	4.16479	4.03485e-05	0.000193134	1.08027
KCNK15	0.407577	3.73467	3.85812	0.000138771	0.000572142	-0.0884362
C9orf50	0.407276	1.73823	5.26951	2.55236e-07	2.08692e-06	5.9359
MACROD2	0.407203	4.68497	3.18412	0.00159811	0.00476827	-2.36818
C2CD4C	0.407038	2.69825	3.8921	0.000121477	0.000510618	0.0370659
SPEF1	0.406849	1.99474	3.55459	0.000436998	0.00155125	-1.16494
FAM155B	0.406774	2.99163	4.02396	7.18266e-05	0.000321716	0.53358
NECAB3	0.406611	5.58455	6.72856	8.17003e-11	1.30713e-09	13.7653
SYT17	0.406301	5.12903	5.53737	6.51018e-08	6.07343e-07	7.25808
ACER2	0.406252	5.05977	3.82139	0.000160078	0.00064944	-0.222989
MASP1	0.406138	2.78172	3.45802	0.000619512	0.00209548	-1.4904
PRKG2	0.406036	3.60265	4.45071	1.1917e-05	6.64281e-05	2.24165
SLC10A5	0.405642	3.25785	6.19574	1.82536e-09	2.30981e-08	10.7323
NPAS2	0.405505	6.18618	6.18732	1.9144e-09	2.40993e-08	10.6859
WDR90	0.404972	5.73007	6.22154	1.57728e-09	2.02146e-08	10.8747
PHKA1	0.404533	5.6541	6.4452	4.36215e-10	6.1804e-09	12.1285
LNX1	0.404179	5.58816	6.05561	4.00521e-09	4.77676e-08	9.96684
LLGL2	0.404039	8.40004	5.06917	6.85094e-07	5.12149e-06	4.98291
CLCN1	0.403972	2.34838	3.26873	0.00120053	0.0037197	-2.10422
C17orf50	0.403546	1.63634	3.79019	0.000180567	0.000720531	-0.33634
IL17RE	0.403496	6.09759	4.03818	6.78122e-05	0.000305343	0.588021
CCDC114	0.402947	2.58358	3.29649	0.0010916	0.00341894	-2.01624
CLBA1	0.402707	5.40613	7.29072	2.53839e-12	4.94507e-11	17.1654
XDH	0.402602	6.31566	2.97594	0.00314857	0.00848284	-2.98987
CYP51A1	0.402311	6.67904	5.66298	3.36994e-08	3.35108e-07	7.89661
SOX9	0.402208	8.26874	4.44805	1.20565e-05	6.70517e-05	2.23054
RDM1	0.401899	2.27731	5.06206	7.09149e-07	5.28505e-06	4.94964
PLXNB1	0.401688	7.97058	5.77023	1.90366e-08	1.99603e-07	8.45103
MT3	0.40168	1.19682	3.29165	0.0011099	0.00346796	-2.03163
CDK18	0.401326	6.23415	5.28704	2.33775e-07	1.93188e-06	6.02078
RIN1	0.40094	5.71171	5.28627	2.34683e-07	1.9375e-06	6.01703
TMEM141	0.400144	8.23883	6.49138	3.33183e-10	4.81022e-09	12.3916
PPM1N	0.400041	3.54928	4.37644	1.64605e-05	8.79221e-05	1.93344
ATP6V1B1	0.399955	2.86825	3.84497	0.00014607	0.000599473	-0.136739
ADH6	0.399955	3.57252	3.13782	0.00186411	0.00542116	-2.50985
TEDC2	0.3995	3.40484	4.72123	3.54249e-06	2.23832e-05	3.4028
ESM1	0.399289	5.89634	3.12125	0.00196886	0.0056811	-2.56009
SH3YL1	0.399267	7.28061	6.2237	1.55806e-09	1.99984e-08	10.8866
PPP1R9A	0.399101	6.45494	5.08498	6.34438e-07	4.78699e-06	5.05697
MAP7	0.3989	7.05075	5.94285	7.46494e-09	8.4694e-08	9.36095
NOS1AP	0.398858	3.58484	6.02459	4.75763e-09	5.61117e-08	9.79926
SH2D4A	0.398761	7.1806	4.24336	2.90457e-05	0.000145245	1.39261
DHDH	0.398644	3.03004	3.19876	0.00152159	0.00457041	-2.32297
LRFN4	0.39864	6.30268	3.84191	0.000147818	0.000605475	-0.147942
C10orf95	0.398032	3.06761	5.16117	4.3697e-07	3.42152e-06	5.41665
SYNPR	0.397685	1.87781	3.41017	0.000734354	0.00243548	-1.6486
ADAMTS13	0.397497	3.89782	6.11466	2.88089e-09	3.52484e-08	10.2877
RIBC2	0.397465	3.03246	3.80482	0.000170671	0.000685223	-0.283306
ATP1B1	0.397167	10.9336	4.15579	4.18832e-05	0.000199303	1.04483
CDH4	0.396732	2.41515	3.65041	0.000306739	0.00114051	-0.833836
SEMA4B	0.396682	8.3609	4.28549	2.43038e-05	0.000123962	1.56219
ADORA2B	0.39608	5.06182	3.83771	0.000150253	0.000614414	-0.163335
ATP7B	0.396003	5.63433	3.43348	0.00067614	0.00226124	-1.5718
FAM221A	0.395846	4.6088	5.86908	1.11655e-08	1.22274e-07	8.96945
MISP	0.395663	8.61039	3.36225	0.000869071	0.00280941	-1.805
HCN3	0.395642	4.74228	5.85985	1.17393e-08	1.27735e-07	8.92074
UGT1A7	0.395534	2.42493	4.19915	3.49679e-05	0.00017065	1.21621
APOM	0.395496	3.3985	6.56458	2.1675e-10	3.20546e-09	12.8116
KCNJ14	0.395447	3.09424	5.97459	6.27043e-09	7.21524e-08	9.53058
HSD17B3	0.39523	2.42743	4.18949	3.6407e-05	0.000176755	1.1779
VSTM5	0.395223	2.50457	4.0455	6.58317e-05	0.000298162	0.616086
ANLN	0.395166	6.63887	3.33363	0.000960125	0.00306472	-1.89739
MROH6	0.394854	6.23157	2.9565	0.0033482	0.00894202	-3.04592
NR2F6	0.394838	7.67629	6.16319	2.19354e-09	2.73903e-08	10.5532
SAMD10	0.394736	5.10822	5.22295	3.21917e-07	2.57761e-06	5.71167
MYO5C	0.394592	7.46755	5.26231	2.64588e-07	2.1551e-06	5.90112
PCDH1	0.394576	8.85176	5.07629	6.61802e-07	4.96483e-06	5.01625
STK32A	0.394531	4.71887	4.44726	1.20982e-05	6.71958e-05	2.22725
PDZD7	0.394131	2.78562	5.5883	4.99147e-08	4.78523e-07	7.51558
EPHB3	0.393801	6.34671	3.62027	0.000343142	0.00125663	-0.938857
ANG	0.39368	6.87327	3.84968	0.000143416	0.000589432	-0.119459
WNK4	0.393671	2.92727	3.13314	0.00189319	0.00549021	-2.52408
FAAH2	0.393634	6.2345	5.95752	6.88765e-09	7.86691e-08	9.43924
FBXO16	0.393494	3.17711	6.3733	6.61798e-10	9.09143e-09	11.7217
CAPN5	0.393444	7.91668	3.34679	0.000917214	0.00294645	-1.85501
FLNB	0.393392	10.4581	4.04116	6.69979e-05	0.000302157	0.599459
EHF	0.393259	8.75665	3.2321	0.00135981	0.00414226	-2.21929
DOK7	0.393139	4.2582	3.81234	0.00016578	0.000670015	-0.255938
SAMD12	0.392684	6.46646	5.70726	2.66463e-08	2.71524e-07	8.12451
PLEKHG6	0.39251	6.01538	4.24687	2.86188e-05	0.000143533	1.40669
DLX3	0.392298	1.36003	3.24493	0.00130193	0.00399025	-2.17913
OCLN	0.391585	6.82081	4.80582	2.3962e-06	1.58199e-05	3.77805
KPNA7	0.391514	3.96018	2.96489	0.00326063	0.00874109	-3.02176
BCL2L10	0.391439	2.08101	3.49174	0.000548914	0.00188937	-1.3777
CASZ1	0.391073	5.36795	5.25139	2.79417e-07	2.26936e-06	5.84843
PRKAA2	0.390676	5.12298	4.04446	6.61089e-05	0.000299258	0.612107
CFAP157	0.390616	2.53777	4.40164	1.47594e-05	8.01189e-05	2.03749
SMPDL3B	0.390595	5.95156	3.97368	8.79064e-05	0.000382751	0.342503
PRSS12	0.390535	5.99861	3.7708	0.000194527	0.000767716	-0.406374
PPFIA3	0.390374	4.5483	4.25038	2.81988e-05	0.000141708	1.42075
HOOK2	0.390349	6.64848	6.24663	1.36773e-09	1.76354e-08	11.0136
RAB41	0.390262	1.63293	5.86382	1.14892e-08	1.25415e-07	8.94167
TNK1	0.390092	5.45239	6.68548	1.05748e-10	1.66063e-09	13.513
EPB41L1	0.389637	7.78486	5.4286	1.14097e-07	1.00698e-06	6.71462
GRM8	0.389208	2.65349	5.91535	8.67765e-09	9.74774e-08	9.21454
ID1	0.389132	9.021	3.49877	0.000535179	0.00184958	-1.35407
CENPV	0.388942	5.85004	4.47125	1.08897e-05	6.13657e-05	2.32775
TRPM4	0.388191	7.2878	4.46592	1.11479e-05	6.25718e-05	2.30537
ACTL10	0.388039	4.13438	5.4215	1.18319e-07	1.041e-06	6.67945
TRIM46	0.387969	3.83998	4.36219	1.75044e-05	9.26898e-05	1.87481
MAMDC4	0.387723	4.82089	4.25429	2.77367e-05	0.000139686	1.43647
ETV2	0.38768	2.2114	5.39093	1.38291e-07	1.19935e-06	6.52849
CLDND2	0.387277	2.52229	4.4009	1.48066e-05	8.02985e-05	2.03444
FANK1	0.386799	4.61914	5.28382	2.3758e-07	1.95478e-06	6.00517
MST1	0.386697	4.46602	5.6619	3.38922e-08	3.36685e-07	7.89107
MYO5B	0.386542	7.44157	5.24723	2.85284e-07	2.3104e-06	5.82836
RAB3D	0.38609	6.76021	5.12746	5.15608e-07	3.96965e-06	5.25698
NOL3	0.385788	6.82128	5.57682	5.30038e-08	5.02918e-07	7.45736
PRR4	0.385567	2.47525	3.11766	0.00199226	0.00573499	-2.57094
SLC22A18	0.38556	6.14438	3.74021	0.000218636	0.000850367	-0.516181
KIF14	0.385372	4.72808	4.55856	7.39756e-06	4.35631e-05	2.6974
MYO10	0.385216	7.83029	6.8937	3.00651e-11	5.10297e-10	14.7434
FAM83D	0.385184	5.54058	3.13246	0.0018974	0.00550009	-2.52612
YOD1	0.385178	6.45207	6.4645	3.89837e-10	5.56671e-09	12.2383
GATD3B	0.384969	4.61166	4.09153	5.45742e-05	0.000252076	0.793763
RASAL1	0.384657	6.00933	3.31715	0.00101652	0.00321996	-1.95027
GREB1L	0.384363	4.4547	4.16366	4.05386e-05	0.000193791	1.07581
SORD	0.384284	6.47403	5.55871	5.82588e-08	5.48316e-07	7.36572
TTLL10	0.384243	1.46425	4.32948	2.01459e-05	0.000105001	1.74087
PERM1	0.384169	3.30891	3.52948	0.000478873	0.00168025	-1.25038
GCKR	0.383762	3.97645	2.92438	0.00370346	0.00975902	-3.13773
SDR42E1	0.383686	5.04393	6.11515	2.87301e-09	3.5228e-08	10.2904
LRP5	0.383626	8.34144	5.12217	5.29128e-07	4.0627e-06	5.23201
MAST1	0.38354	2.28852	3.90575	0.00011512	0.000487146	0.0877805
PRR19	0.383534	2.087	5.16168	4.35861e-07	3.41442e-06	5.4191
ZBED9	0.383484	2.93884	3.32599	0.000985911	0.00313761	-1.92195
TMEM182	0.383403	4.47681	7.79632	9.53988e-14	2.17778e-12	20.387
TPRN	0.383106	6.1685	4.27077	2.58696e-05	0.000131215	1.50277
VEGFA	0.382683	8.54905	4.30632	2.22419e-05	0.000114523	1.6466
CPNE4	0.382676	2.16442	3.75348	0.000207849	0.000813181	-0.468644
B3GNT7	0.382122	7.26347	3.13702	0.00186908	0.00543282	-2.5123
PCLO	0.382011	4.94809	3.66862	0.000286542	0.00107648	-0.770003
NPW	0.381464	1.33458	2.92788	0.00366319	0.00966789	-3.12779
FAM83B	0.381326	6.09991	4.0295	7.02374e-05	0.000315095	0.554758
PCDHB14	0.381305	5.4027	5.70278	2.72891e-08	2.77078e-07	8.10137
E2F7	0.381193	3.95627	3.71836	0.000237556	0.000914881	-0.594123
CLEC18B	0.380859	2.00456	3.29452	0.00109899	0.00343769	-2.02248
EGR4	0.380853	2.00402	3.21955	0.00141873	0.00429712	-2.25843
MKRN2OS	0.380499	4.13182	4.5352	8.2085e-06	4.78581e-05	2.5979
LRRC46	0.380376	2.68807	5.08116	6.46315e-07	4.86582e-06	5.03908
MSH5-SAPCD1	0.379952	3.44424	5.43601	1.09849e-07	9.72518e-07	6.75134
SLC16A8	0.379776	2.58051	5.10667	5.70798e-07	4.34732e-06	5.1589
SH3RF1	0.379458	7.82466	5.78931	1.71827e-08	1.81545e-07	8.55056
BEND7	0.379367	5.03864	5.13931	4.86509e-07	3.76729e-06	5.31303
WFDC10B	0.378496	1.74435	2.95517	0.00336226	0.00897676	-3.04974
C4orf47	0.378337	3.04713	3.86795	0.00013354	0.000554338	-0.052218
NUDT12	0.377906	6.13732	6.12212	2.76293e-09	3.39517e-08	10.3284
GPR39	0.37774	5.432	4.99097	9.99065e-07	7.19048e-06	4.61942
SHROOM1	0.377541	6.6399	5.6347	3.91223e-08	3.83268e-07	7.75185
TPD52	0.377418	7.88654	4.62307	5.5379e-06	3.3422e-05	2.97455
TMED3	0.377317	7.47042	6.88032	3.2622e-11	5.49255e-10	14.6635
MANSC1	0.377297	7.11039	5.04559	7.68021e-07	5.69139e-06	4.87278
FBXL8	0.376888	4.69213	4.64887	4.92783e-06	3.01033e-05	3.08636
AQP10	0.376707	1.19217	2.97372	0.00317085	0.00853136	-2.99631
FAM110C	0.376701	6.48285	4.75813	2.98907e-06	1.92412e-05	3.56578
REP15	0.376559	3.16859	3.05214	0.00246694	0.00689939	-2.76691
PLK1	0.376426	5.43424	3.97251	8.83206e-05	0.000384259	0.33806
S100A6	0.376152	13.6893	3.3011	0.00107439	0.00336939	-2.00154
ARSH	0.376104	0.850852	4.87904	1.7007e-06	1.15418e-05	4.10752
PRLR	0.376102	4.43742	3.39052	0.000787057	0.00258507	-1.71299
RAB40B	0.3758	5.37033	6.20297	1.75226e-09	2.22228e-08	10.7721
MAMSTR	0.375729	3.09681	6.33583	8.21211e-10	1.10581e-08	11.5111
SLC25A29	0.375725	6.48017	5.27651	2.46455e-07	2.0229e-06	5.96973
TONSL	0.375706	5.2623	4.8434	2.01057e-06	1.34621e-05	3.94663
TBC1D30	0.375529	5.19689	5.51739	7.22179e-08	6.67869e-07	7.15756
UGT1A4	0.375496	2.32212	3.88911	0.00012291	0.000516005	0.0260003
DDR1	0.375483	9.29319	5.47381	9.04574e-08	8.14835e-07	6.93942
FOXH1	0.375399	2.31161	4.18048	3.77999e-05	0.000182568	1.14223
OR2B6	0.375289	1.18755	3.2107	0.0014617	0.00441154	-2.28595
RAP1GAP2	0.375111	7.18218	4.19801	3.5134e-05	0.000171259	1.21171
PTPRF	0.374942	9.48215	5.32015	1.97927e-07	1.66476e-06	6.18169
LBX2	0.374825	2.90782	4.88983	1.61634e-06	1.10265e-05	4.15644
MECOM	0.374806	7.5454	3.9752	8.73751e-05	0.000381008	0.348234
AP1S3	0.37408	6.44704	4.56765	7.10318e-06	4.19021e-05	2.73625
C11orf91	0.374056	2.27301	3.80702	0.000169224	0.000680376	-0.27529
BCAN	0.37389	2.70908	3.78545	0.000183889	0.000731557	-0.35349
ROPN1B	0.373746	1.05339	4.44441	1.22501e-05	6.79064e-05	2.21533
LRRC8E	0.373722	4.0905	6.36322	7.01412e-10	9.58146e-09	11.665
ZNF630	0.373502	4.4301	5.96089	6.7614e-09	7.7383e-08	9.45724
PRSS22	0.37344	7.13907	2.95313	0.00338396	0.00902477	-3.0556
FAM241B	0.373063	4.95187	5.10167	5.84884e-07	4.44465e-06	5.13539
ASB12	0.373063	1.45633	4.91313	1.44779e-06	1.00542e-05	4.26236
METTL11B	0.37293	1.25312	3.01389	0.00279007	0.00766819	-2.87951
SRRM5	0.372726	2.84785	6.48724	3.41344e-10	4.92387e-09	12.368
KRTDAP	0.372358	0.800031	3.56437	0.000421634	0.00150519	-1.1315
KRT12	0.372357	1.20192	3.00362	0.00288322	0.00787203	-2.90951
E2F1	0.371738	5.28744	3.92771	0.00010555	0.000451228	0.1697
KCNC4	0.3717	4.83756	5.97996	6.08785e-09	7.0194e-08	9.55933
CENPF	0.371477	6.64879	3.85318	0.000141474	0.000582438	-0.106616
CDC25C	0.370726	3.74673	3.88129	0.000126745	0.00052988	-0.00297419
ZNF524	0.370595	6.60515	6.19228	1.86148e-09	2.35202e-08	10.7132
LRRC73	0.370574	2.56942	4.3654	1.72641e-05	9.1639e-05	1.88799
ADGRG1	0.370188	8.48428	5.47418	9.02853e-08	8.13716e-07	6.94126
GALE	0.369997	7.57796	3.91708	0.000110085	0.000468287	0.129988
UGT1A8	0.369917	1.88161	3.00411	0.00287865	0.00786432	-2.90806
MAP3K21	0.369725	5.96877	4.70075	3.89094e-06	2.43284e-05	3.31281
STBD1	0.369605	5.39785	6.26289	1.24677e-09	1.61985e-08	11.1039
UCN	0.369199	2.81499	4.15967	4.12139e-05	0.000196448	1.06013
AHSG	0.369122	1.01246	3.49265	0.000547131	0.00188438	-1.37466
FNDC11	0.368922	2.33488	3.68471	0.000269738	0.00102238	-0.713336
MARVELD3	0.368848	5.93305	5.53387	6.62984e-08	6.17828e-07	7.24043
GAN	0.368847	5.6727	7.12008	7.43037e-12	1.3632e-10	16.1125
PABPC3	0.3687	1.57705	3.7179	0.000237969	0.000916057	-0.595755
OR2A7	0.368176	3.22768	3.937	0.000101736	0.000436813	0.204458
PPP1R13L	0.367989	6.92777	3.78288	0.000185717	0.000738138	-0.362792
CYP3A7	0.367966	2.44811	4.51266	9.07185e-06	5.23532e-05	2.50228
PATJ	0.36795	7.77411	7.47309	7.90391e-13	1.63332e-11	18.3102
ASL	0.367803	7.69928	5.80475	1.5813e-08	1.68082e-07	8.63126
SALL1	0.367532	3.05478	3.34902	0.000910117	0.00292597	-1.8478
ACY1	0.367475	5.56648	4.57056	7.01126e-06	4.14317e-05	2.74871
MTFP1	0.367449	5.38513	4.94676	1.23409e-06	8.68358e-06	4.41603
RTN4R	0.367032	4.29299	3.75763	0.000204581	0.000801313	-0.453746
LANCL3	0.366746	2.84448	5.40781	1.26889e-07	1.11066e-06	6.61176
PAFAH1B3	0.366448	6.7584	5.83871	1.31641e-08	1.42147e-07	8.80941
TMIE	0.366193	2.45461	3.71886	0.000237107	0.000913565	-0.592347
POLE2	0.366073	4.16366	5.74207	2.2134e-08	2.28696e-07	8.30463
KLHL35	0.365616	3.25109	4.62028	5.60805e-06	3.38093e-05	2.96249
PAK4	0.365551	6.85024	5.04947	7.53742e-07	5.5923e-06	4.89087
ASB4	0.365406	2.41368	3.33095	0.000969091	0.00308986	-1.906
TTLL2	0.365364	1.70142	4.63202	5.31851e-06	3.22122e-05	3.01327
TSACC	0.365103	1.63573	4.77839	2.72173e-06	1.76809e-05	3.65573
ARHGAP33	0.365	4.43249	5.27728	2.45503e-07	2.01607e-06	5.97346
TMEM61	0.364998	3.62979	2.96343	0.00327573	0.00877328	-3.02597
KIF9	0.364844	4.39035	6.62864	1.48359e-10	2.25683e-09	13.1821
BGLAP	0.364786	1.9311	3.58039	0.000397568	0.00143008	-1.07657
PGAP3	0.364749	7.40282	5.22471	3.19124e-07	2.55886e-06	5.72008
SPAG16	0.364473	5.78021	7.19083	4.77016e-12	8.96421e-11	16.5469
GLTPD2	0.364448	2.37766	3.5696	0.000413634	0.00147942	-1.1136
DBP	0.364432	4.88859	4.37325	1.66889e-05	8.89185e-05	1.9203
STYK1	0.364386	5.61621	3.33608	0.000951987	0.0030416	-1.8895
SLC23A3	0.363854	3.48314	4.68815	4.12151e-06	2.56194e-05	3.25761
PODXL2	0.36367	6.49165	3.16331	0.00171297	0.00506034	-2.43208
DUSP4	0.363517	7.7488	4.24671	2.86388e-05	0.000143591	1.40603
SYCE3	0.363321	1.61801	3.07735	0.00227317	0.00641762	-2.69197
HSPB9	0.363043	1.92324	4.20884	3.35792e-05	0.000164862	1.25472
BBC3	0.362865	5.63383	3.99014	8.22996e-05	0.000361205	0.404814
SCRIB	0.362452	7.55315	5.19489	3.69968e-07	2.92926e-06	5.57732
CMTM4	0.362096	7.6031	6.25264	1.3217e-09	1.71197e-08	11.047
RTBDN	0.361703	2.42815	3.32144	0.00100156	0.00318026	-1.93653
SHC3	0.361688	3.74193	4.31871	2.10953e-05	0.000109214	1.69701
DNASE1L2	0.361547	2.69746	4.29161	2.36792e-05	0.00012108	1.58698
DNAH3	0.361394	3.09846	4.09195	5.44785e-05	0.000251786	0.795426
RIPPLY1	0.361023	1.02485	4.94501	1.24441e-06	8.74535e-06	4.40801
TM7SF2	0.360464	5.63323	5.08163	6.44856e-07	4.85699e-06	5.04126
CES3	0.360447	5.28794	3.53641	0.000466952	0.00164453	-1.22685
GOLGA6L10	0.360216	2.85017	5.00231	9.46151e-07	6.85899e-06	4.67183
L3MBTL1	0.360121	4.273	6.99319	1.63284e-11	2.86877e-10	15.3411
PLLP	0.359726	6.33778	3.33378	0.000959627	0.00306371	-1.89691
C1GALT1	0.359373	7.50515	5.62437	4.13097e-08	4.0261e-07	7.69907
MFSD3	0.359213	6.09159	4.71278	3.68248e-06	2.31612e-05	3.36562
PLCH1	0.359122	5.49616	4.31373	2.15493e-05	0.000111395	1.67672
PHOSPHO2	0.358896	4.47063	6.82434	4.58456e-11	7.57722e-10	14.3305
PIH1D2	0.358682	3.29867	7.10411	8.20885e-12	1.49313e-10	16.0148
CENPS-CORT	0.35855	1.90699	4.15161	4.26148e-05	0.000202218	1.02839
DIRAS2	0.35832	3.02458	2.99454	0.00296789	0.00806438	-2.93594
C11orf1	0.358248	5.58487	6.66299	1.20936e-10	1.87319e-09	13.3818
CRYBB3	0.358237	1.49324	4.06006	6.20495e-05	0.000283144	0.672122
ATP8B1	0.358075	8.02229	4.57525	6.86588e-06	4.06009e-05	2.76876
DUSP8	0.358038	5.4112	4.49363	9.86809e-06	5.63366e-05	2.42187
BEAN1	0.358007	4.53888	3.3496	0.000908265	0.00292112	-1.84592
SPATA46	0.357988	1.74182	5.06484	6.99641e-07	5.21648e-06	4.96266
KLHL23	0.357713	5.91675	4.20512	3.41059e-05	0.00016711	1.23993
GIPR	0.357681	5.39072	3.17794	0.00163147	0.00485587	-2.38721
IMPA2	0.357291	7.00029	3.23501	0.0013465	0.00410908	-2.21021
CBWD6	0.357143	3.50997	6.66413	1.20118e-10	1.86232e-09	13.3885
C9orf116	0.357048	3.71909	4.27611	2.52906e-05	0.000128547	1.52431
PRPF40B	0.357009	4.88378	7.84132	7.07456e-14	1.64592e-12	20.6808
PRDM16	0.356723	4.71903	3.64108	0.000317595	0.00117625	-0.866418
DGAT1	0.356623	7.4138	5.4866	8.46852e-08	7.6731e-07	7.00328
MIA2	0.356341	6.18512	7.77029	1.13351e-13	2.55502e-12	20.2175
GALNT7	0.355877	7.5926	4.59586	6.25977e-06	3.73281e-05	2.85722
CCDC150	0.355584	3.10942	5.99312	5.66183e-09	6.55931e-08	9.62992
NEDD4L	0.355039	6.32458	5.66675	3.30346e-08	3.29511e-07	7.91594
LRRC56	0.354789	4.34373	4.51235	9.08447e-06	5.24083e-05	2.50095
MICALL2	0.354415	7.09242	3.94881	9.70706e-05	0.000419751	0.248793
ASAP2	0.354105	7.32199	4.22889	3.08705e-05	0.000153468	1.33467
EXPH5	0.353793	5.91117	5.87827	1.06215e-08	1.17146e-07	9.01801
SHROOM3	0.353303	8.2167	4.15552	4.19305e-05	0.000199472	1.04376
SP5	0.353213	2.84921	3.02123	0.00272522	0.00752156	-2.85801
ASPM	0.352813	5.70528	3.85338	0.000141362	0.000582117	-0.105867
LFNG	0.352496	8.00495	3.59121	0.000382057	0.00137954	-1.03937
ADCK5	0.352345	5.6129	4.68335	4.21273e-06	2.60897e-05	3.23662
C17orf100	0.352217	4.06468	5.47172	9.14385e-08	8.22366e-07	6.92897
CLCN2	0.352103	5.12462	5.82314	1.43197e-08	1.5336e-07	8.72764
DRD2	0.352061	1.60551	3.1951	0.0015404	0.00461956	-2.33429
ACYP1	0.351989	5.1974	6.70179	9.59212e-11	1.51611e-09	13.6084
SLC16A5	0.351727	6.40093	3.10516	0.00207574	0.00594027	-2.60863
GCAT	0.35168	5.75502	3.74915	0.000211314	0.000825178	-0.48418
KLHL30	0.351022	3.54665	4.12351	4.78579e-05	0.000224344	0.918292
FRMD5	0.351002	4.82078	3.82589	0.000157312	0.000639589	-0.206573
RASSF6	0.350894	6.89868	3.93802	0.000101323	0.000435373	0.208293
PRICKLE4	0.350781	3.99395	5.47346	9.062e-08	8.15868e-07	6.93768
STK39	0.35063	8.06084	5.33857	1.80359e-07	1.52986e-06	6.27157
MCRIP2	0.350514	5.81288	4.44518	1.22085e-05	6.77422e-05	2.21858
TMEM79	0.350329	5.17059	5.6313	3.98299e-08	3.89527e-07	7.73446
CHAD	0.349813	3.33266	3.80796	0.000168612	0.000678399	-0.271884
FERMT1	0.349761	7.66645	2.9802	0.00310637	0.0083804	-2.97756
ENDOG	0.34963	5.01489	4.36418	1.73549e-05	9.20346e-05	1.88299
TMEM68	0.349584	5.67566	7.57355	4.1226e-13	8.64527e-12	18.9492
SMKR1	0.349568	2.84811	3.18177	0.00161072	0.00479894	-2.37541
TMEM30B	0.349234	7.83326	4.85057	1.9442e-06	1.30537e-05	3.97889
GET4	0.349097	5.27336	6.84953	3.93459e-11	6.57269e-10	14.4801
FUT2	0.348904	7.46581	3.0546	0.00244738	0.00684696	-2.75962
SSH3	0.348821	7.44354	5.16771	4.23106e-07	3.32214e-06	5.44777
SHB	0.348548	7.36911	4.69616	3.97345e-06	2.47987e-05	3.29269
TRAF4	0.348317	7.86724	6.14397	2.44401e-09	3.02513e-08	10.4479
SPATA25	0.34827	3.09989	5.8207	1.45094e-08	1.55098e-07	8.71485
LETM2	0.348096	4.39203	4.21322	3.29679e-05	0.000162423	1.27218
LMO7	0.348089	8.97059	4.01134	7.55781e-05	0.000336481	0.485404
MIPOL1	0.348005	4.5525	7.24907	3.30453e-12	6.38637e-11	16.9068
HCN1	0.34787	1.60692	3.08218	0.00223766	0.00632788	-2.67753
FUT6	0.34777	5.92269	2.93343	0.00360001	0.00952627	-3.11196
FAM83F	0.347582	4.68216	4.19914	3.49688e-05	0.00017065	1.21619
RHOD	0.347468	7.39007	2.96752	0.00323367	0.00867704	-3.01419
CCDC33	0.347123	1.55401	3.30576	0.0010573	0.00332693	-1.98669
ENO2	0.347081	7.63801	3.18017	0.00161933	0.00482227	-2.38033
MPZL2	0.346989	8.09988	3.12834	0.00192339	0.00556312	-2.53862
EPPK1	0.346975	6.25951	2.99763	0.00293885	0.00799952	-2.92696
CMTM8	0.34662	5.93378	5.02512	8.47797e-07	6.21218e-06	4.77756
LZTS3	0.34661	6.39996	4.42777	1.31731e-05	7.23859e-05	2.14599
MYPN	0.346299	1.74962	3.50645	0.000520538	0.00180817	-1.32821
CENPA	0.346259	4.02077	3.39033	0.000787579	0.00258628	-1.7136
PDF	0.346048	4.11294	4.9325	1.32069e-06	9.23181e-06	4.35077
SOWAHA	0.345698	4.06044	3.05768	0.00242308	0.00678789	-2.75048
POC1A	0.34519	4.98262	4.24139	2.92877e-05	0.00014637	1.38472
RNF32	0.345182	3.91674	5.80039	1.61887e-08	1.71754e-07	8.60844
KLHDC9	0.345143	4.51769	4.49923	9.62697e-06	5.51637e-05	2.44551
WBP2NL	0.344977	2.74782	5.67458	3.16927e-08	3.17058e-07	7.95618
ILDR1	0.344686	5.88992	4.24439	2.89201e-05	0.000144788	1.39673
SLC26A5	0.344646	2.07366	3.94532	9.84288e-05	0.00042476	0.235668
SYS1-DBNDD2	0.344566	1.97533	3.07419	0.00229669	0.00647973	-2.7014
CYSTM1	0.344535	9.55295	3.33915	0.00094191	0.0030145	-1.87964
TCAP	0.344418	1.92265	3.48041	0.000571756	0.00195454	-1.41569
PWWP2B	0.344391	6.77453	4.66485	4.58298e-06	2.81687e-05	3.15588
RNF43	0.344389	6.06642	4.21133	3.32308e-05	0.000163434	1.26463
LIME1	0.344148	5.00987	4.19573	3.54709e-05	0.000172654	1.20264
ANK1	0.34398	4.05319	3.02183	0.00271998	0.00750952	-2.85625
SLC45A3	0.343719	6.72577	3.08142	0.00224326	0.00634161	-2.67983
DIAPH3	0.343584	4.56668	4.2532	2.78655e-05	0.000140168	1.43206
DEPDC1B	0.343301	4.43721	3.39907	0.000763712	0.00252154	-1.68502
PYCR3	0.343079	5.87851	5.84745	1.25557e-08	1.36096e-07	8.85539
VPS37D	0.343001	4.22497	4.08107	5.69577e-05	0.000261876	0.753247
LIN9	0.342931	4.78602	6.1152	2.87215e-09	3.5228e-08	10.2907
GALNTL6	0.3428	1.54081	3.50321	0.000526682	0.00182615	-1.33915
TMPRSS7	0.342764	1.06787	4.50451	9.40498e-06	5.40738e-05	2.46781
CDC45	0.342705	4.62695	3.34118	0.000935293	0.00299671	-1.8731
TROAP	0.342629	4.41384	3.24298	0.00131057	0.00401312	-2.18524
GLUD2	0.342588	3.47459	4.61618	5.71263e-06	3.43546e-05	2.9448
KAAG1	0.342518	1.96544	3.06045	0.00240146	0.00673176	-2.74227
DSP	0.342328	9.72749	4.33599	1.95913e-05	0.000102505	1.76747
F2RL1	0.341813	8.33546	3.52271	0.000490783	0.00171708	-1.2733
PLAC8L1	0.340749	2.76108	5.66177	3.39153e-08	3.36718e-07	7.89041
DBNDD2	0.340357	5.98298	5.28603	2.34968e-07	1.93797e-06	6.01585
PIMREG	0.34017	3.88688	3.86189	0.000136744	0.000565151	-0.0745622
HCAR1	0.340123	4.22405	3.02613	0.00268266	0.00742096	-2.84362
CHADL	0.340101	3.54749	4.17546	3.85987e-05	0.000185805	1.12237
GRIN1	0.339738	1.31681	3.09433	0.00215069	0.00611652	-2.64118
FZD5	0.3397	6.87182	4.36121	1.75784e-05	9.30456e-05	1.87079
CCDC74B	0.339615	3.27221	3.94514	9.85001e-05	0.000424852	0.234984
PTPN20	0.33951	3.7973	3.08378	0.00222603	0.00629917	-2.67275
ACOT4	0.339468	4.44901	4.75143	3.08294e-06	1.98154e-05	3.53611
TPPP	0.339429	4.91767	3.38558	0.00080085	0.00262204	-1.72912
DNAJA4	0.339338	6.86305	4.3166	2.12862e-05	0.000110123	1.68843
FAM86B1	0.339046	3.62358	5.9341	7.83179e-09	8.86196e-08	9.31429
ELOVL6	0.338972	5.81066	4.4017	1.47552e-05	8.01189e-05	2.03776
D2HGDH	0.338769	6.13528	4.6719	4.43831e-06	2.73685e-05	3.18662
FBXW9	0.33857	5.4129	6.10613	3.02168e-09	3.68385e-08	10.2412
PLEKHH3	0.338439	6.19762	4.79907	2.4726e-06	1.62673e-05	3.74791
KCTD1	0.338162	5.56437	5.11539	5.46973e-07	4.18272e-06	5.20002
SPR	0.338069	7.77648	5.49673	8.03685e-08	7.34064e-07	7.05396
SPINT1	0.338026	9.42997	4.40537	1.45219e-05	7.90319e-05	2.05296
CCSER1	0.338021	4.72237	4.92039	1.39879e-06	9.74173e-06	4.29548
PPP1R26	0.337778	6.87019	6.52918	2.66966e-10	3.90059e-09	12.608
PSMC3IP	0.337534	4.12046	5.4536	1.0037e-07	8.94183e-07	6.83872
ZBTB42	0.337226	5.48419	5.60888	4.48119e-08	4.33513e-07	7.62015
FOXM1	0.337109	5.67085	3.1742	0.00165196	0.00490828	-2.3987
CCNB3	0.336963	2.54452	6.72392	8.40084e-11	1.34153e-09	13.7381
SLC9C1	0.336629	2.81229	6.64011	1.38584e-10	2.12141e-09	13.2487
RAD54B	0.336624	4.28462	6.02	4.88021e-09	5.73188e-08	9.7745
SDC1	0.336239	10.3552	3.06603	0.00235835	0.00662621	-2.72568
FOXP4	0.336085	7.0335	4.58131	6.68197e-06	3.95959e-05	2.79475
LSMEM1	0.336049	3.46857	5.64538	3.69808e-08	3.63966e-07	7.80645
EPHA1	0.335819	6.35542	4.53702	8.14242e-06	4.74891e-05	2.60563
EML2	0.335696	7.04959	6.23944	1.42484e-09	1.83439e-08	10.9738
GRTP1	0.335646	5.99452	3.71349	0.000241981	0.000930238	-0.611448
TMEM178A	0.335618	3.21662	4.80978	2.35246e-06	1.55735e-05	3.79575
PLEKHB1	0.335542	6.31645	3.09603	0.00213877	0.00608873	-2.63608
HDHD3	0.335243	7.68889	4.3861	1.57872e-05	8.48589e-05	1.97327
AURKA	0.335225	5.80157	3.81324	0.00016521	0.000668028	-0.252695
RASD2	0.335161	4.18585	3.8841	0.000125351	0.000525085	0.00745607
RAB19	0.335069	3.50548	4.57766	6.79195e-06	4.02056e-05	2.77913
PLEKHG3	0.335068	7.05063	5.54473	6.26592e-08	5.87132e-07	7.29514
CCDC153	0.334953	3.05646	3.91482	0.000111071	0.000471886	0.121571
MACC1	0.334803	7.71379	3.32928	0.000974739	0.00310613	-1.91139
UGT8	0.334737	7.32141	4.2139	3.28748e-05	0.000162034	1.27487
SPAG17	0.334295	3.84009	3.99399	8.10375e-05	0.000357048	0.41943
C4orf36	0.334147	2.65314	5.26056	2.66919e-07	2.17304e-06	5.89265
STEAP3	0.33373	7.3829	3.33787	0.000946101	0.00302564	-1.88375
RAB40C	0.333536	6.6294	5.74478	2.18159e-08	2.25821e-07	8.31869
MANEAL	0.333427	6.26008	4.81327	2.31448e-06	1.5334e-05	3.81138
NRG4	0.333399	3.51464	3.48601	0.000560367	0.00191985	-1.39694
BAG1	0.333326	7.51485	5.81067	1.5316e-08	1.6331e-07	8.66228
SCN8A	0.333086	4.45799	5.24225	2.92451e-07	2.36169e-06	5.80439
AATK	0.333016	5.29322	2.96251	0.00328525	0.00879462	-3.02862
CA13	0.332703	5.54325	4.33468	1.97015e-05	0.000103001	1.76212
PROSER3	0.332497	4.36324	5.99623	5.56551e-09	6.46535e-08	9.64662
MZF1	0.332438	5.76629	4.44147	1.24083e-05	6.86495e-05	2.20308
PKMYT1	0.332349	4.04354	3.1386	0.0018593	0.00541087	-2.50748
PRKCZ	0.332152	5.61253	5.3832	1.43839e-07	1.24239e-06	6.49043
SLC7A1	0.331911	7.48115	5.63639	3.87769e-08	3.80323e-07	7.76045
SPIN4	0.331863	5.35679	4.88015	1.69182e-06	1.14861e-05	4.11256
SPINK7	0.33185	0.761225	3.70264	0.000252111	0.000963949	-0.649936
MGST2	0.331834	7.67025	5.99701	5.5416e-09	6.44197e-08	9.65081
BUD23	0.331704	7.19208	7.68263	2.02033e-13	4.44856e-12	19.6497
SLC9C2	0.331483	1.52584	4.12169	4.82188e-05	0.000225911	0.911165
ASPHD2	0.331283	5.69923	3.1715	0.00166689	0.00494141	-2.40698
STRC	0.331093	2.11003	4.04288	6.6534e-05	0.000300463	0.606038
C11orf80	0.331039	6.12817	5.45503	9.9634e-08	8.8809e-07	6.84585
PRAC2	0.330957	1.03654	2.9162	0.00379932	0.00998069	-3.16098
CACNG8	0.330952	3.33336	4.03793	6.78807e-05	0.000305571	0.587065
INF2	0.33088	8.38174	3.96305	9.17195e-05	0.000397927	0.30237
PCP2	0.33087	2.59743	3.69932	0.00025529	0.000975009	-0.661695
ABCB6	0.330747	4.88542	6.36299	7.02338e-10	9.58641e-09	11.6637
SLC44A3	0.33074	7.09163	4.291	2.37406e-05	0.000121358	1.58451
CCDC78	0.330615	2.92989	3.69727	0.000257272	0.000981697	-0.668952
TTK	0.330532	4.6535	3.44385	0.000651659	0.00218681	-1.53749
RHPN2	0.330524	7.73126	3.16074	0.00172772	0.00509507	-2.43997
ZMYND10	0.330425	2.75914	3.20229	0.00150367	0.00452138	-2.31205
ANKEF1	0.330309	5.49726	4.89104	1.60717e-06	1.09727e-05	4.16192
ANKRD9	0.330293	5.84131	5.66406	3.3507e-08	3.33637e-07	7.90216
TGFBR3L	0.330028	1.47546	2.99379	0.002975	0.00807852	-2.93813
LRRC23	0.329993	5.14145	3.94516	9.84929e-05	0.000424852	0.235053
LRRC1	0.329803	6.96025	5.73268	2.32714e-08	2.3943e-07	8.25598
THOC3	0.329752	5.81624	5.60491	4.57546e-08	4.42381e-07	7.59996
ATAT1	0.329549	5.27102	6.16263	2.20048e-09	2.74567e-08	10.5502
SATB2	0.329477	4.099	5.32271	1.95387e-07	1.64503e-06	6.19418
ZNF703	0.329392	7.02924	4.09442	5.39325e-05	0.000249722	0.804975
MYO19	0.329214	6.5286	6.56633	2.14522e-10	3.17803e-09	12.8217
CCNI2	0.32921	3.90551	4.09159	5.45602e-05	0.000252076	0.794005
C11orf52	0.328768	3.49508	6.11473	2.87974e-09	3.52484e-08	10.2881
PLCD3	0.328702	6.89553	3.33006	0.000972113	0.00309834	-1.90889
CDH1	0.328454	10.1891	3.87108	0.000131918	0.000548407	-0.0406957
DSG2	0.328311	9.55234	3.37677	0.000825995	0.00269004	-1.75782
SH3TC2	0.328284	4.23902	3.52594	0.000485056	0.0016994	-1.26235
CMBL	0.328195	7.46989	4.20187	3.45727e-05	0.000169057	1.22701
SMIM10L2A	0.328109	3.63289	4.34407	1.89232e-05	9.94826e-05	1.80053
FSCN2	0.328097	2.9386	4.00723	7.68375e-05	0.000341017	0.469769
MAD2L1	0.327891	5.158	4.1058	5.14726e-05	0.000239938	0.849234
ZC2HC1C	0.327839	4.26061	5.75974	2.0138e-08	2.10373e-07	8.39641
CFAP99	0.327746	0.92584	3.63301	0.000327289	0.00120522	-0.894575
CENPK	0.327477	4.40727	3.81815	0.0001621	0.000656704	-0.234808
UQCRHL	0.327475	1.90389	4.16096	4.09939e-05	0.000195575	1.06521
C1orf56	0.32741	4.82506	6.79074	5.61854e-11	9.16151e-10	14.1315
RPH3AL	0.326934	5.69421	3.62912	0.000332056	0.00122156	-0.908114
C11orf42	0.326928	2.01164	4.83716	2.0702e-06	1.38233e-05	3.91854
UGT1A3	0.326916	2.36944	3.45845	0.000618576	0.00209397	-1.489
ANKRD36C	0.326912	6.59843	3.66406	0.00029148	0.00109262	-0.786021
CACFD1	0.326837	7.13689	5.58165	5.16834e-08	4.93254e-07	7.48182
CACNB3	0.326821	6.02054	4.83769	2.06504e-06	1.37942e-05	3.92094
FOXD2	0.326628	3.23362	3.71674	0.000239017	0.000919468	-0.599881
ATP8B3	0.326542	3.44751	3.47275	0.00058769	0.00200257	-1.4413
AJM1	0.326517	3.65321	3.774	0.000192155	0.000759287	-0.394838
E2F8	0.32639	4.14004	3.64086	0.000317862	0.00117698	-0.867202
CSPG5	0.326355	2.15889	3.93685	0.000101795	0.000436958	0.203906
ANKS6	0.326341	6.38857	6.28106	1.12396e-09	1.4704e-08	11.205
RAB6D	0.326304	1.56574	3.19262	0.00155325	0.00465072	-2.34195
DOC2A	0.326235	2.46066	3.95106	9.62081e-05	0.000416233	0.257225
GINS2	0.326042	4.66754	3.83898	0.000149512	0.000611679	-0.158679
TYRP1	0.325905	2.81544	3.03652	0.0025945	0.00721698	-2.81305
LMTK2	0.325547	7.24991	5.93677	7.71809e-09	8.74318e-08	9.32851
ZFP41	0.325537	5.00726	6.01696	4.96307e-09	5.82117e-08	9.75811
TST	0.325501	8.07884	3.3134	0.00102979	0.00325289	-1.96228
CDC25A	0.325433	3.95698	3.93906	0.000100908	0.000434026	0.212174
C2orf16	0.325211	3.59138	6.73941	7.65472e-11	1.22931e-09	13.829
AP1S1	0.325102	8.10489	6.74143	7.56221e-11	1.21772e-09	13.8409
RIBC1	0.324684	3.13524	4.73884	3.26716e-06	2.08341e-05	3.48041
PLAC1	0.324661	1.08625	2.91952	0.00376012	0.00989454	-3.15155
TTPA	0.324611	1.71431	3.2736	0.00118074	0.00366439	-2.08885
SPATA24	0.324157	3.70629	5.92192	8.37166e-09	9.42893e-08	9.24945
DUOX1	0.324067	4.91841	3.14281	0.00183361	0.00535095	-2.49469
GALNT4	0.323356	5.90401	3.73264	0.000225028	0.000871569	-0.543251
C8orf74	0.323135	0.567206	4.04121	6.69865e-05	0.000302157	0.59962
PPIP5K1	0.322874	6.45368	7.09965	8.44003e-12	1.53027e-10	15.9876
ALOX12B	0.3227	1.33223	3.0666	0.00235405	0.00661631	-2.72401
TRIM45	0.322489	4.74897	6.73221	7.99311e-11	1.28003e-09	13.7867
DNAH5	0.322468	5.14567	4.19597	3.54356e-05	0.000172532	1.20359
COBL	0.322111	5.93426	4.01116	7.56326e-05	0.000336547	0.484722
DNMT3B	0.322057	4.37329	5.06627	6.94795e-07	5.18945e-06	4.96936
SPATA17	0.321913	3.08268	4.30418	2.24456e-05	0.000115397	1.63792
TMEM262	0.321699	1.06021	4.43122	1.29762e-05	7.13503e-05	2.16036
MORN1	0.321512	4.00249	6.34617	7.73814e-10	1.04779e-08	11.5691
SYCP2	0.321332	4.14714	3.48392	0.000564594	0.00193317	-1.40394
HSD17B8	0.321311	6.47877	4.79536	2.51567e-06	1.65317e-05	3.73132
KIF15	0.321183	4.65585	4.09724	5.33121e-05	0.000247119	0.815943
EXO1	0.320986	4.29657	3.65489	0.000301644	0.00112427	-0.818143
DDTL	0.320915	4.27733	5.58743	5.01435e-08	4.80175e-07	7.51114
HSPBP1	0.320561	7.08736	5.59009	4.94492e-08	4.74863e-07	7.52466
TNFRSF21	0.320233	9.3287	3.97816	8.63469e-05	0.000377119	0.359424
EBP	0.320073	7.60032	4.84628	1.98365e-06	1.32923e-05	3.95958
HSF2BP	0.32004	3.01023	5.03924	7.91957e-07	5.84077e-06	4.84321
TOB1	0.319538	8.7193	4.04677	6.54916e-05	0.000296701	0.62099
DECR2	0.319156	5.92338	4.30988	2.19067e-05	0.000113059	1.66106
IQCH	0.319136	3.70747	6.8137	4.88986e-11	8.03497e-10	14.2674
UQCC3	0.319104	6.12955	5.32016	1.97921e-07	1.66476e-06	6.18172
LYSMD4	0.319047	4.97008	5.55288	6.00545e-08	5.64592e-07	7.33629
UBXN10	0.319029	5.7355	3.17646	0.00163953	0.00487731	-2.39175
LRGUK	0.318876	2.99671	4.95636	1.17888e-06	8.33647e-06	4.46008
NIPAL1	0.318868	4.80605	3.77447	0.000191812	0.000758462	-0.39316
ANKRD37	0.318715	4.96346	3.36601	0.000857699	0.0027774	-1.79278
SFXN2	0.318584	4.63549	5.38535	1.42276e-07	1.231e-06	6.501
BFSP1	0.318571	3.60979	4.50157	9.52778e-06	5.47059e-05	2.45541
ASS1	0.318475	9.08338	3.11649	0.00199996	0.00575327	-2.57448
ZNF367	0.318274	4.59042	4.57072	7.0063e-06	4.14168e-05	2.74939
FIZ1	0.318192	4.861	7.4028	1.24206e-12	2.51173e-11	17.8666
C5orf63	0.318173	4.71251	6.20846	1.69856e-09	2.16062e-08	10.8025
UBE2S	0.317958	6.17935	3.86456	0.000135324	0.000560102	-0.0647265
HS3ST5	0.31793	1.97746	3.3308	0.000969612	0.00309094	-1.9065
CNTD1	0.317915	3.32421	5.41203	1.24184e-07	1.08922e-06	6.63262
NPM2	0.317911	3.87841	2.9328	0.00360714	0.00954217	-3.11376
WDR62	0.317669	3.81508	4.01734	7.37712e-05	0.000329558	0.508301
PEX11A	0.317642	5.63987	5.56103	5.75592e-08	5.42632e-07	7.37743
COLCA2	0.317641	5.16091	3.2564	0.00125211	0.00386191	-2.14309
SPHK2	0.3175	5.22734	5.39103	1.3822e-07	1.19934e-06	6.52899
ERMP1	0.317212	7.25323	5.76686	1.93834e-08	2.02739e-07	8.4335
IFT172	0.317167	6.74977	6.99823	1.58284e-11	2.78381e-10	15.3716
GINS1	0.316859	4.76824	3.66214	0.000293584	0.00109881	-0.792761
NECTIN1	0.316831	6.41523	3.81221	0.000165864	0.000670194	-0.256413
SLC25A48	0.316788	2.00375	3.56124	0.000426502	0.00152009	-1.14223
ZC3HAV1L	0.316564	4.94995	5.59787	4.74763e-08	4.57726e-07	7.56414
NTHL1	0.316438	5.96336	4.88369	1.66384e-06	1.13233e-05	4.12859
COL27A1	0.316413	6.49025	3.85863	0.000138498	0.00057129	-0.0865757
CIT	0.316382	5.03221	4.20535	3.40727e-05	0.000166996	1.24086
DTL	0.316288	5.14145	3.63857	0.000320579	0.00118446	-0.875176
KCNK7	0.31597	2.37874	3.78632	0.000183277	0.000729495	-0.350353
RCCD1	0.31588	5.31253	5.86396	1.14804e-08	1.254e-07	8.94241
KLHL31	0.315304	2.78497	5.16685	4.24913e-07	3.33326e-06	5.44366
FATE1	0.315132	1.0244	3.37707	0.000825111	0.00268773	-1.75683
CCDC189	0.315096	2.9019	5.34954	1.70624e-07	1.45819e-06	6.32524
RIPPLY3	0.31494	3.09432	4.28724	2.41237e-05	0.000123094	1.56927
PAM16	0.314806	5.1289	5.0231	8.56079e-07	6.26156e-06	4.76819
ABCA13	0.314721	4.14089	3.17442	0.00165074	0.00490634	-2.39802
ELL3	0.314584	4.01828	4.39306	1.53189e-05	8.27074e-05	2.00199
CABP4	0.314445	4.84504	3.86778	0.00013363	0.000554576	-0.052854
SPTY2D1OS	0.314193	2.3857	5.33949	1.79527e-07	1.52584e-06	6.27604
MROH1	0.314079	6.80715	4.94229	1.2606e-06	8.84814e-06	4.39558
CAPRIN2	0.313972	6.85381	3.65969	0.000296279	0.00110743	-0.801326
THAP10	0.313567	3.79457	6.02048	4.86731e-09	5.7286e-08	9.77707
KRTCAP2	0.313561	7.00958	5.69442	2.85285e-08	2.88286e-07	8.05826
TMEM253	0.313401	2.24571	3.527	0.000483202	0.00169405	-1.25878
SLC22A14	0.313088	1.12601	4.6355	5.23541e-06	3.17428e-05	3.02835
RHBDL2	0.312913	5.84255	2.94253	0.00349867	0.00929426	-3.08596
ALG1L2	0.31288	2.06283	4.40738	1.43959e-05	7.84712e-05	2.06128
CLCNKB	0.312779	2.03832	3.5766	0.000403146	0.00144801	-1.0896
TMEM44	0.31255	6.0377	4.96972	1.10608e-06	7.87733e-06	4.52144
TRMT10A	0.312531	4.52063	6.82047	4.69344e-11	7.73462e-10	14.3075
KLC4	0.312328	6.98786	4.70454	3.82404e-06	2.39365e-05	3.32944
EFHC2	0.312295	3.36234	3.60059	0.000369055	0.00133771	-1.00698
CHEK1	0.312176	5.19544	4.47441	1.07397e-05	6.06612e-05	2.341
ZNF57	0.31208	5.18149	5.0808	6.47451e-07	4.87221e-06	5.03739
GLS2	0.312036	3.23896	3.72191	0.000234383	0.00090512	-0.581497
ZNF628	0.311949	3.96694	4.71975	3.56668e-06	2.24995e-05	3.39627
TRMT61A	0.311756	6.53829	5.40163	1.3095e-07	1.1415e-06	6.58128
PLPP2	0.311712	7.60426	2.97774	0.00313066	0.00844192	-2.98467
ITGA3	0.311636	9.64882	2.92817	0.00365983	0.00966201	-3.12695
CCDC9B	0.311468	6.84407	2.98302	0.00307867	0.00831227	-2.96939
CDC42BPA	0.311349	8.4298	5.74465	2.18309e-08	2.25838e-07	8.31802
KBTBD11	0.311344	6.10101	3.92281	0.000107619	0.000459061	0.151374
MUC12	0.311234	3.07777	2.9342	0.0035913	0.00950618	-3.10975
IGLON5	0.311189	2.57674	3.11627	0.00200136	0.00575535	-2.57512
WFDC13	0.311084	2.0941	3.40775	0.000740669	0.00245319	-1.65655
HSD11B1L	0.310764	4.62951	4.72133	3.54087e-06	2.23832e-05	3.40323
C8orf82	0.310438	6.08503	5.72574	2.41501e-08	2.4802e-07	8.21999
TRIM2	0.310284	7.68304	4.10043	5.26195e-05	0.00024443	0.82834
PLXNA3	0.31027	6.71989	4.88351	1.6653e-06	1.13287e-05	4.12775
PRRG4	0.310208	6.46039	4.43623	1.2696e-05	6.99677e-05	2.1812
ZNF432	0.31015	6.07403	6.15131	2.3452e-09	2.91343e-08	10.4881
ILVBL	0.309961	7.38303	6.29136	1.05969e-09	1.39383e-08	11.2625
CYB561	0.309862	8.35183	5.30594	2.12612e-07	1.77685e-06	6.1125
ZNF692	0.309779	6.22453	4.53235	8.31326e-06	4.84025e-05	2.58577
RNASE4	0.309772	6.00649	3.99965	7.92176e-05	0.0003503	0.440912
HJURP	0.309676	5.35343	3.14577	0.00181572	0.0053108	-2.48567
EFNA5	0.30967	6.39315	3.19521	0.00153981	0.00461862	-2.33394
RAET1G	0.309574	2.3074	3.02038	0.00273263	0.00753832	-2.86049
IZUMO4	0.309515	3.42784	3.76847	0.000196271	0.000773398	-0.414769
LUZP2	0.309227	3.18586	3.24762	0.00129009	0.00395824	-2.17069
FUT1	0.308678	5.07648	3.76538	0.00019861	0.00078065	-0.425903
CFAP52	0.30853	1.44253	3.70533	0.000249565	0.000955935	-0.640412
KHDC4	0.308525	7.47965	5.64546	3.69657e-08	3.63966e-07	7.80685
ITGA6	0.308438	10.0322	3.60291	0.000365908	0.00132771	-0.99897
KCNQ3	0.308422	4.40428	3.46212	0.000610506	0.00207056	-1.47677
CPO	0.308073	1.78001	4.14129	4.44736e-05	0.000209571	0.987876
CHTF18	0.307856	5.05515	4.04708	6.54106e-05	0.000296492	0.622161
SKA3	0.307808	4.45288	3.31372	0.00102865	0.00325052	-1.96126
AGPAT2	0.307783	8.80889	3.60514	0.000362917	0.00131827	-0.991291
FRK	0.307594	6.14272	4.378	1.63499e-05	8.75235e-05	1.93987
PCDHB11	0.307533	4.42228	3.21345	0.00144822	0.00437787	-2.27741
ZNF69	0.307468	5.36263	4.47092	1.09058e-05	6.14185e-05	2.32634
CDC6	0.30724	5.27889	3.18738	0.00158075	0.00472557	-2.35812
TTC30A	0.307205	5.54717	5.78276	1.77983e-08	1.87776e-07	8.51636
LENG9	0.307144	5.4431	4.33001	2.00998e-05	0.000104826	1.74305
CACNB1	0.307141	4.92036	3.99972	7.91937e-05	0.0003503	0.441198
ENKD1	0.307008	6.59378	4.49181	9.94762e-06	5.67715e-05	2.4142
GFPT1	0.306914	8.83217	5.86234	1.15815e-08	1.2626e-07	8.9339
KIF24	0.306778	4.34036	4.96222	1.14637e-06	8.13702e-06	4.487
FKBP1B	0.306739	5.48115	3.93793	0.000101359	0.000435418	0.207957
ZNF784	0.306633	5.06054	5.7566	2.04787e-08	2.13538e-07	8.38012
NAPEPLD	0.306535	6.46473	6.13935	2.50827e-09	3.10015e-08	10.4226
MSH5	0.306313	4.2132	4.73888	3.26644e-06	2.08341e-05	3.48063
ACTR3B	0.3063	4.35515	6.69871	9.77054e-11	1.54144e-09	13.5904
GRAMD1C	0.306176	5.27474	5.13925	4.86667e-07	3.76729e-06	5.31271
SPC24	0.306105	4.96658	3.45966	0.000615904	0.00208617	-1.48497
ZNF572	0.30604	4.18512	5.51048	7.48497e-08	6.88464e-07	7.12288
C15orf65	0.305749	4.0135	4.29508	2.33324e-05	0.000119486	1.60102
CORO2A	0.305529	7.46294	2.95153	0.00340101	0.00906314	-3.06018
LARP1B	0.305224	6.3867	6.59677	1.79207e-10	2.6829e-09	12.9974
DNAH14	0.3052	4.70512	5.44241	1.06301e-07	9.43562e-07	6.78313
EXD3	0.305015	5.26112	4.5906	6.40929e-06	3.81129e-05	2.83463
SERHL2	0.304885	3.58268	5.8573	1.19031e-08	1.29434e-07	8.90728
ANKRD24	0.304854	3.05103	3.81328	0.000165183	0.000668028	-0.252542
NAT14	0.304773	5.86291	3.63985	0.000319057	0.00118064	-0.870718
ZNHIT2	0.304715	5.77397	3.88094	0.000126919	0.000530347	-0.00426802
GPR78	0.304275	1.6767	3.06094	0.0023976	0.00672207	-2.7408
FAM86B2	0.303913	2.04836	4.22333	3.15998e-05	0.00015668	1.31247
NEIL1	0.303901	5.22959	3.73481	0.000223177	0.000865851	-0.535492
ATP6V1C2	0.303742	3.95625	3.77913	0.000188413	0.00074763	-0.376347
SCN5A	0.303573	2.40648	2.98255	0.00308323	0.00832194	-2.97074
PRR22	0.303486	2.97535	3.36907	0.000848582	0.00275259	-1.78286
NOL4L	0.303396	6.82604	6.92979	2.41101e-11	4.13764e-10	14.9595
SHC2	0.303278	6.88338	2.97723	0.00313577	0.0084522	-2.98616
PDE9A	0.303247	5.21375	3.77694	0.000190003	0.000753051	-0.384247
ARHGEF39	0.30313	4.55625	3.87992	0.000127427	0.000531946	-0.00803287
AKR1B15	0.303026	1.58046	2.92171	0.00373453	0.00983024	-3.14533
DRD4	0.302889	2.5038	2.9721	0.00318715	0.00856978	-3.00098
C9orf43	0.302721	2.39874	5.09195	6.1325e-07	4.63948e-06	5.08972
SYT9	0.302615	2.81895	3.49753	0.000537587	0.00185639	-1.35826
MXD3	0.302557	4.58885	4.0126	7.51955e-05	0.000335041	0.490206
NRBP2	0.302152	6.84315	4.7697	2.83348e-06	1.83298e-05	3.6171
EME1	0.302095	3.53357	3.7797	0.000187998	0.000746329	-0.374271
KIAA1671	0.302048	7.16366	5.77242	1.88141e-08	1.97635e-07	8.46245
HES5	0.302033	1.26763	3.50208	0.00052883	0.00183248	-1.34295
KIAA1958	0.301941	4.54437	5.64087	3.78718e-08	3.72089e-07	7.78336
IPO4	0.301892	5.37154	6.08714	3.35999e-09	4.06714e-08	10.1379
TOP1MT	0.301624	5.96957	4.52421	8.61921e-06	5.00296e-05	2.55122
ATOH7	0.301607	0.967306	4.51758	8.87642e-06	5.13474e-05	2.5231
TTC32	0.301453	4.48482	4.82767	2.1641e-06	1.43881e-05	3.87592
SLC22A5	0.301271	5.01279	6.2631	1.24526e-09	1.61912e-08	11.1051
ZNF860	0.301212	4.6227	4.10037	5.26314e-05	0.00024443	0.828125
SLC35G1	0.301064	4.25189	5.08805	6.25012e-07	4.72216e-06	5.0714
MOCOS	0.301036	5.17367	3.77669	0.000190182	0.000753419	-0.385136
PCDHGA1	0.300791	2.68478	3.65445	0.000302144	0.00112589	-0.819694
CALML6	0.300516	1.23849	3.38924	0.000790613	0.00259575	-1.71718
ZNF593	0.300236	5.06232	4.32714	2.03481e-05	0.000105861	1.73136
NTRK3	-0.300009	2.50932	-3.62271	0.000340054	0.00124775	-0.930396
MYL3	-0.300071	2.17842	-4.42546	1.33063e-05	7.30239e-05	2.13638
RNF175	-0.300285	2.57557	-5.2148	3.35214e-07	2.67401e-06	5.67258
ELK3	-0.300364	8.07292	-4.90355	1.51494e-06	1.04437e-05	4.21875
HEPACAM	-0.300586	0.808925	-3.41537	0.000720986	0.00239488	-1.63152
RRAGD	-0.300719	6.32528	-4.5464	7.80967e-06	4.57524e-05	2.64554
SH3BGRL	-0.300741	9.45211	-6.21425	1.64381e-09	2.09871e-08	10.8344
LBH	-0.3011	8.97272	-4.16531	4.02614e-05	0.000192772	1.08233
CRTAP	-0.301258	8.72904	-6.51725	2.86327e-10	4.17271e-09	12.5396
CNTNAP1	-0.301259	5.36845	-4.66789	4.52002e-06	2.78119e-05	3.16914
NUAK1	-0.301339	7.15036	-3.5161	0.000502693	0.0017555	-1.29567
SSH2	-0.302296	6.66293	-6.07362	3.62327e-09	4.36452e-08	10.0644
KLF12	-0.302948	6.24203	-5.11524	5.47381e-07	4.18396e-06	5.1993
EDN1	-0.302957	6.83884	-2.98046	0.00310382	0.00837485	-2.97681
HECA	-0.303053	7.73211	-7.24873	3.31159e-12	6.39276e-11	16.9047
OPRL1	-0.303096	3.71867	-6.0908	3.29202e-09	3.9934e-08	10.1578
RTL5	-0.30368	5.05115	-3.26047	0.00123486	0.00381356	-2.13027
PLEKHM2	-0.303979	8.11326	-7.81587	8.37879e-14	1.92885e-12	20.5145
FAM43B	-0.304088	3.22773	-3.49914	0.000534479	0.00184754	-1.35285
ZBTB32	-0.304331	2.70137	-5.40315	1.29942e-07	1.1333e-06	6.58875
SYNE1	-0.304555	7.21834	-4.89669	1.56484e-06	1.07399e-05	4.18758
FOXS1	-0.304622	5.53356	-3.00522	0.00286846	0.00784182	-2.90482
OR52K2	-0.304733	1.24445	-4.9977	9.67329e-07	6.99462e-06	4.65051
RNASE1	-0.305042	10.3749	-3.07132	0.00231823	0.0065294	-2.70996
AP1B1	-0.305149	8.52415	-8.48474	8.7548e-16	2.43289e-14	25.0027
P2RY1	-0.305935	5.34589	-3.60098	0.000368531	0.00133609	-1.00565
HBEGF	-0.306017	7.2567	-3.0331	0.0026232	0.00728611	-2.82312
FAT4	-0.306251	6.13788	-4.34014	1.92454e-05	0.00010099	1.78444
SPRY1	-0.306629	7.75737	-4.3778	1.63646e-05	8.75501e-05	1.93901
ATP11C	-0.306756	6.49458	-6.69203	1.01689e-10	1.59984e-09	13.5513
SLCO1C1	-0.307001	2.18804	-4.22484	3.14e-05	0.000155873	1.3185
ADCY7	-0.307047	6.32905	-4.77395	2.77822e-06	1.80272e-05	3.636
IL26	-0.307077	0.770791	-4.22029	3.20045e-05	0.000158411	1.30037
CYTH3	-0.307172	7.44509	-5.09854	5.93882e-07	4.50497e-06	5.12066
SOCS2	-0.307346	5.54863	-4.5077	9.27303e-06	5.33513e-05	2.48132
KCNMB1	-0.307419	3.95381	-3.7297	0.000227557	0.000880559	-0.553744
NOX4	-0.307453	5.80916	-3.19808	0.00152505	0.00457899	-2.32506
TRIM69	-0.30764	4.64498	-5.58038	5.20264e-08	4.95416e-07	7.4754
ADARB1	-0.307679	5.66591	-5.42787	1.14524e-07	1.01022e-06	6.711
ITGA9	-0.307709	6.03177	-4.36051	1.76317e-05	9.32409e-05	1.8679
PREX2	-0.307717	5.55932	-4.40886	1.43037e-05	7.80941e-05	2.0674
PLSCR4	-0.307883	7.34831	-4.3123	2.16811e-05	0.000112008	1.67092
RASL11B	-0.307891	4.94312	-3.08677	0.00220444	0.00625056	-2.66382
ST6GALNAC6	-0.308022	7.5888	-6.68557	1.0569e-10	1.66063e-09	13.5136
ZNF101	-0.308054	5.93113	-7.25895	3.10426e-12	6.01301e-11	16.9681
C3orf80	-0.308268	4.23098	-3.59064	0.000382851	0.00138182	-1.04131
TBC1D2B	-0.308439	7.8862	-6.58511	1.92003e-10	2.86941e-09	12.93
KLHL4	-0.308616	3.53022	-3.39225	0.000782273	0.00257184	-1.70733
STK4	-0.308708	7.66242	-7.3599	1.63426e-12	3.26219e-11	17.5974
RCBTB2	-0.308967	6.75547	-6.64596	1.33846e-10	2.05444e-09	13.2827
LOXL3	-0.309124	5.52778	-5.30565	2.12916e-07	1.77852e-06	6.11112
RNASE3	-0.309551	1.31382	-4.40556	1.45102e-05	7.89935e-05	2.05373
MS4A4E	-0.309773	5.15663	-5.81682	1.48167e-08	1.58185e-07	8.69448
MYCBP2	-0.310544	7.98362	-6.19885	1.79354e-09	2.27124e-08	10.7494
APOBEC3D	-0.310613	5.48758	-5.36758	1.55718e-07	1.33888e-06	6.41366
ADAMTS10	-0.310751	5.86244	-3.98526	8.39257e-05	0.000367584	0.386313
NOS3	-0.310902	5.48266	-5.01697	8.81739e-07	6.43594e-06	4.73974
NECAP2	-0.312195	7.97794	-8.0578	1.65345e-14	4.09318e-13	22.1103
PRSS23	-0.312356	8.74704	-3.96477	9.10921e-05	0.000395609	0.308856
NHSL2	-0.312673	4.22367	-5.0304	8.26472e-07	6.0727e-06	4.8021
RECQL	-0.312715	7.40037	-4.89285	1.59349e-06	1.08987e-05	4.17014
ANOS1	-0.31285	5.58149	-3.53828	0.000463778	0.00163437	-1.22048
HTRA1	-0.313228	9.99319	-3.20349	0.0014976	0.00450632	-2.30832
GYPE	-0.313255	2.74073	-6.21691	1.61919e-09	2.07049e-08	10.8491
SH3PXD2B	-0.313504	8.06088	-3.84386	0.000146705	0.000601932	-0.140823
VEGFC	-0.313575	5.66552	-3.85895	0.00013832	0.000570697	-0.0853682
GAS6	-0.313954	8.7408	-4.25226	2.79757e-05	0.000140681	1.42831
JAK1	-0.313976	9.71227	-7.41328	1.16132e-12	2.35126e-11	17.9326
EVC	-0.314014	6.53613	-3.74443	0.000215152	0.000838664	-0.50109
VMO1	-0.314067	4.73612	-3.14007	0.0018503	0.00539206	-2.50302
ITGA1	-0.314386	8.08781	-5.21395	3.36636e-07	2.684e-06	5.66849
ADAM22	-0.314759	5.83211	-3.90109	0.000117251	0.000495181	0.0704687
JAK2	-0.314823	6.89465	-5.87916	1.05702e-08	1.16732e-07	9.02272
ZNF331	-0.314833	6.29849	-3.86712	0.000133977	0.000555608	-0.0552958
SLC2A6	-0.314868	5.39149	-3.87074	0.00013209	0.000548854	-0.0419242
CGNL1	-0.314916	6.63111	-3.8238	0.000158587	0.000644466	-0.214176
MFGE8	-0.315037	8.38656	-3.97333	8.80304e-05	0.000383192	0.341171
TACC1	-0.315127	8.80894	-4.67486	4.37906e-06	2.70522e-05	3.1995
LTBP1	-0.315354	8.97917	-3.32875	0.000976515	0.0031112	-1.91308
PDE2A	-0.315355	4.63537	-4.05738	6.27297e-05	0.00028599	0.661795
TMEM170B	-0.315398	4.88347	-5.82335	1.43033e-08	1.53281e-07	8.72875
SPSB1	-0.315518	8.05618	-4.49565	9.78017e-06	5.59097e-05	2.43042
ROR2	-0.315669	6.04801	-3.67589	0.000278826	0.00105139	-0.744411
NAGK	-0.315801	6.87739	-9.4066	1.13937e-18	4.05382e-17	31.555
ARHGAP22	-0.315813	4.56713	-5.80208	1.60416e-08	1.703e-07	8.61731
CACNA1I	-0.316664	2.38077	-3.25465	0.00125958	0.00387995	-2.14859
SLC12A3	-0.316767	1.62225	-4.62833	5.40794e-06	3.27189e-05	2.99729
EVC2	-0.316908	5.02246	-5.70779	2.65716e-08	2.70925e-07	8.12723
KCNJ10	-0.317092	2.33905	-3.88023	0.000127269	0.000531549	-0.00686618
RASIP1	-0.31713	5.09547	-4.76529	2.89186e-06	1.86586e-05	3.59752
FCAR	-0.317211	3.87915	-5.91262	8.80789e-09	9.88099e-08	9.20006
COX7A1	-0.317765	6.54214	-4.19296	3.58838e-05	0.000174365	1.19165
CYP7B1	-0.317785	6.0294	-3.7745	0.000191786	0.000758462	-0.393034
EAF2	-0.317837	4.66499	-5.47154	9.15195e-08	8.22659e-07	6.92811
SDC3	-0.318637	7.64675	-5.58916	4.96911e-08	4.76916e-07	7.51993
RAB34	-0.318838	7.6222	-3.80435	0.000170981	0.000686144	-0.285014
PXK	-0.318858	6.14619	-7.32899	1.99038e-12	3.92697e-11	17.404
GNAI2	-0.318911	9.65498	-8.06984	1.52396e-14	3.77814e-13	22.1905
BMP2K	-0.31911	5.92957	-7.81424	8.47008e-14	1.94663e-12	20.5039
PNRC1	-0.319228	8.83259	-6.24218	1.40274e-09	1.80731e-08	10.989
ANXA1	-0.319635	10.0728	-2.96904	0.00321819	0.00864095	-3.00982
TPM2	-0.319728	9.74506	-3.25986	0.00123744	0.00382083	-2.1322
HMCN1	-0.319848	6.96258	-3.26207	0.00122816	0.00379769	-2.12524
SLITRK4	-0.319924	4.0401	-3.3828	0.000808687	0.00264335	-1.73816
PLD3	-0.32002	9.44762	-4.85103	1.93995e-06	1.30303e-05	3.98099
ZCCHC18	-0.32004	3.28564	-4.41315	1.4039e-05	7.67477e-05	2.08522
CTSH	-0.320246	9.30922	-3.56254	0.000424476	0.00151375	-1.13778
TMEM200A	-0.320306	6.3426	-3.61995	0.000343542	0.00125783	-0.93995
ITGA7	-0.320456	5.64651	-3.47194	0.000589407	0.00200762	-1.44401
TGFB1	-0.320547	7.65669	-4.60185	6.09327e-06	3.64375e-05	2.88303
MAP1A	-0.320832	6.72933	-4.46192	1.13453e-05	6.35216e-05	2.2886
RFLNB	-0.320883	6.57017	-4.05534	6.3253e-05	0.000288094	0.653926
MDGA1	-0.321126	4.22747	-5.37713	1.48346e-07	1.27872e-06	6.46058
CORO1C	-0.32183	8.64639	-6.0736	3.62363e-09	4.36452e-08	10.0643
JCAD	-0.32189	7.24252	-4.71373	3.66652e-06	2.30779e-05	3.36979
NGF	-0.322571	2.44592	-3.34397	0.000926263	0.0029717	-1.86411
VSTM4	-0.322917	6.52247	-5.11743	5.41553e-07	4.15435e-06	5.20962
NTM	-0.323143	6.92897	-3.04348	0.00253692	0.00707301	-2.79252
CCIN	-0.323391	2.20138	-4.82587	2.18236e-06	1.45039e-05	3.86785
SDC2	-0.323511	8.05339	-4.30429	2.24347e-05	0.000115375	1.63838
APOL6	-0.323637	8.0368	-5.49418	8.14351e-08	7.41417e-07	7.04119
MYLK	-0.323766	7.86331	-3.22147	0.00140958	0.00427169	-2.25246
OVCH1	-0.324096	1.86651	-4.50317	9.46062e-06	5.43754e-05	2.46217
MCAM	-0.324131	8.01872	-4.69506	3.99354e-06	2.49058e-05	3.28785
SUSD5	-0.32481	4.19085	-3.85774	0.000138976	0.000572848	-0.0898272
CPQ	-0.324869	7.7703	-5.20256	3.56193e-07	2.83007e-06	5.61396
CHODL	-0.32492	1.95362	-3.87611	0.000129341	0.000538745	-0.0220906
ITPKB	-0.325437	6.80792	-5.7521	2.09785e-08	2.18215e-07	8.3567
FMOD	-0.325569	8.82213	-3.71189	0.000243448	0.000935241	-0.61712
TSKS	-0.326077	1.99144	-4.684	4.20025e-06	2.60327e-05	3.23947
MPZ	-0.326275	3.58518	-4.05734	6.27405e-05	0.00028599	0.661632
SMIM3	-0.326364	8.01697	-4.21773	3.23513e-05	0.000159849	1.29013
PKD2	-0.326442	7.74542	-5.12809	5.14035e-07	3.95933e-06	5.25993
PTGFR	-0.326461	4.09966	-3.65759	0.000298624	0.00111448	-0.808712
CDC20B	-0.32689	1.66135	-3.5725	0.00040926	0.00146645	-1.10367
RAPGEF1	-0.326928	7.91904	-7.45035	9.15151e-13	1.87518e-11	18.1664
TLN1	-0.327479	10.0072	-5.10042	5.88453e-07	4.46977e-06	5.12952
GGA2	-0.328045	7.90687	-7.49633	6.80258e-13	1.41779e-11	18.4575
APOC4-APOC2	-0.328059	0.832862	-3.7944	0.000177665	0.000709617	-0.321096
SLC6A6	-0.328134	8.68692	-3.94678	9.78578e-05	0.000422725	0.241164
TPP1	-0.328165	8.81904	-7.54224	5.0528e-13	1.05829e-11	18.7494
FEZ1	-0.329048	5.34223	-5.54058	6.40274e-08	5.98304e-07	7.27421
RNF213	-0.329625	9.01193	-6.00048	5.43625e-09	6.32383e-08	9.66948
CARD8	-0.329852	6.28982	-8.5287	6.43547e-16	1.81205e-14	25.3059
CMPK2	-0.329996	6.01448	-3.07307	0.00230501	0.00649997	-2.70472
SV2B	-0.330761	4.75845	-3.30311	0.001067	0.00335176	-1.99514
TNS1	-0.330861	8.85179	-3.81583	0.000163559	0.000662299	-0.243243
RGCC	-0.330908	7.56113	-3.96722	9.02054e-05	0.000391858	0.318101
ASAH1	-0.331281	9.37703	-6.69314	1.01012e-10	1.59066e-09	13.5578
CCRL2	-0.331495	5.29828	-4.29825	2.30197e-05	0.00011817	1.61387
FCGRT	-0.331814	8.99961	-6.91357	2.66266e-11	4.54201e-10	14.8623
FILIP1	-0.332526	4.85413	-5.24426	2.89531e-07	2.34255e-06	5.81408
NAV3	-0.3327	5.29706	-4.78116	2.68696e-06	1.74951e-05	3.66807
IL5RA	-0.332775	2.36417	-5.20032	3.60168e-07	2.85832e-06	5.60324
MAP3K14	-0.332852	5.98344	-6.39545	5.82251e-10	8.0638e-09	11.8467
ADORA2A	-0.333003	1.98354	-4.173	3.89948e-05	0.000187499	1.11268
ABCC9	-0.333112	7.37161	-4.32399	2.06248e-05	0.000107071	1.71849
OAS3	-0.333194	7.80609	-3.26372	0.00122128	0.00377779	-2.12005
FSTL3	-0.333475	8.59384	-3.15	0.00179043	0.00525132	-2.47277
REM1	-0.333567	3.39677	-4.99413	9.84027e-07	7.10329e-06	4.63403
SPTA1	-0.334359	1.91929	-6.14221	2.46828e-09	3.05295e-08	10.4383
PMCH	-0.33465	1.77899	-4.37119	1.68383e-05	8.96025e-05	1.9118
AKT3	-0.334706	7.28836	-5.34504	1.74551e-07	1.48876e-06	6.30323
CSK	-0.335096	7.40716	-6.70725	9.28357e-11	1.47007e-09	13.6404
MUSK	-0.335373	2.29901	-3.74351	0.00021591	0.000841042	-0.504397
SAT1	-0.335473	10.952	-4.72025	3.55847e-06	2.24644e-05	3.39848
IRAK3	-0.335631	6.90991	-4.65192	4.86018e-06	2.97221e-05	3.0996
VENTX	-0.336595	3.79095	-6.09948	3.13634e-09	3.82089e-08	10.205
DOCK4	-0.336625	6.29373	-7.0835	9.33249e-12	1.68311e-10	15.8891
SLC43A2	-0.336839	6.66418	-5.68843	2.94499e-08	2.97067e-07	8.02741
SESN3	-0.33791	7.6469	-4.24398	2.89701e-05	0.000144953	1.39509
RNF144A	-0.338206	7.24233	-4.35327	1.81899e-05	9.59541e-05	1.8382
UTRN	-0.338326	8.57507	-5.7469	2.157e-08	2.23956e-07	8.3297
DPYS	-0.338709	1.45156	-3.62838	0.000332965	0.00122438	-0.910674
LEPR	-0.339454	5.79112	-4.20858	3.36147e-05	0.000164989	1.25372
ADGRF5	-0.339715	7.04016	-5.65181	3.57486e-08	3.53681e-07	7.83933
SP110	-0.339837	5.73225	-6.35844	7.21025e-10	9.83357e-09	11.6381
TIMP2	-0.339918	10.519	-4.30916	2.19738e-05	0.000113279	1.65815
GMIP	-0.339937	6.73339	-6.3838	6.22823e-10	8.58375e-09	11.7809
TRAM2	-0.340541	7.6974	-6.0407	4.35112e-09	5.14959e-08	9.88619
SLC17A7	-0.34055	1.85275	-4.22959	3.07791e-05	0.000153103	1.33749
MGAT1	-0.340597	8.99713	-9.37623	1.42684e-18	5.04025e-17	31.3329
PNMA3	-0.341182	2.65586	-3.30575	0.00105733	0.00332693	-1.98672
KRT222	-0.34125	2.63689	-3.81181	0.000166121	0.000670755	-0.257872
PARVB	-0.341958	6.11036	-4.66794	4.51917e-06	2.78119e-05	3.16932
JAM3	-0.342208	7.39181	-5.33443	1.84171e-07	1.55753e-06	6.25135
HAAO	-0.342251	4.97668	-5.41505	1.22283e-07	1.07476e-06	6.64755
SH3PXD2A	-0.342313	8.59499	-5.08246	6.42247e-07	4.84162e-06	5.04517
IFIH1	-0.342331	7.26764	-4.85968	1.86285e-06	1.25521e-05	4.01997
CMTM3	-0.342357	8.07707	-3.87654	0.000129124	0.000538107	-0.0205109
RASGRF2	-0.342413	5.82339	-4.39086	1.54655e-05	8.34458e-05	1.99291
PKD2L1	-0.343101	2.1022	-4.07768	5.77514e-05	0.000265238	0.740132
PLEKHA2	-0.343181	7.72041	-6.66171	1.21862e-10	1.88581e-09	13.3744
PDE7A	-0.344779	6.83002	-5.25472	2.7482e-07	2.23523e-06	5.86446
CPED1	-0.344795	6.35617	-3.75533	0.000206387	0.000808018	-0.46201
CERCAM	-0.344816	7.88999	-4.01451	7.46191e-05	0.000332734	0.497487
RNF144B	-0.345332	6.65064	-5.90861	9.0031e-09	1.008e-07	9.17874
TGFBR2	-0.345681	9.71342	-5.07956	6.51372e-07	4.89955e-06	5.03157
BEST1	-0.345813	4.14539	-7.99327	2.55698e-14	6.19467e-13	21.6814
CTSO	-0.346109	8.16643	-5.88913	1.00122e-08	1.11147e-07	9.07544
SERPINH1	-0.346909	10.0021	-4.05451	6.34659e-05	0.000288832	0.650744
MICAL1	-0.346926	7.18653	-5.94575	7.3472e-09	8.35253e-08	9.37641
BCHE	-0.347546	3.99503	-3.76651	0.000197748	0.000777957	-0.421818
SCARF2	-0.347572	6.26664	-3.52539	0.000486035	0.00170222	-1.26423
ADRB3	-0.348081	1.36792	-3.72003	0.000236059	0.000910888	-0.588187
MAPK11	-0.348138	5.85446	-4.57542	6.86041e-06	4.05826e-05	2.76953
STAT2	-0.34837	8.85329	-8.14178	9.34527e-15	2.34764e-13	22.6716
WBP1L	-0.348767	8.58169	-7.61079	3.23402e-13	6.88373e-12	19.1876
LHX6	-0.34927	3.55573	-6.15823	2.25568e-09	2.81249e-08	10.526
NR3C1	-0.349816	7.85066	-6.70972	9.14728e-11	1.45119e-09	13.6548
SMO	-0.349867	6.1281	-5.03807	7.96426e-07	5.86864e-06	4.83778
SGCE	-0.350438	7.24012	-5.00577	9.30561e-07	6.75461e-06	4.68783
GRB2	-0.350766	8.8016	-10.7476	3.85918e-23	1.80311e-21	41.7278
LRFN5	-0.35078	3.23653	-5.7929	1.68545e-08	1.78484e-07	8.56929
ARID5B	-0.350928	7.7465	-5.38165	1.44978e-07	1.25096e-06	6.4828
ACSL1	-0.351412	8.42994	-4.46504	1.11912e-05	6.27732e-05	2.30167
SLC16A6	-0.351584	4.44212	-4.98715	1.01754e-06	7.31106e-06	4.60178
TNMD	-0.351765	1.07028	-3.02079	0.00272906	0.00752969	-2.85929
MYH10	-0.352238	7.92881	-4.41092	1.41759e-05	7.74459e-05	2.07597
SORCS2	-0.352561	5.05379	-3.69732	0.000257222	0.000981697	-0.668771
CD8B2	-0.35308	2.71552	-3.45027	0.000636901	0.00214735	-1.51617
WDR81	-0.353191	6.78567	-7.59242	3.64575e-13	7.70226e-12	19.0699
VGLL3	-0.353289	6.21193	-3.66449	0.000291012	0.00109134	-0.784512
ADAM33	-0.353363	5.00533	-3.60879	0.00035805	0.00130365	-0.978659
C1QTNF2	-0.353398	3.84291	-4.95717	1.17432e-06	8.31463e-06	4.46381
GUCY1B1	-0.353519	6.69784	-5.33315	1.85367e-07	1.56609e-06	6.24509
KCTD20	-0.353856	8.31179	-7.99012	2.61187e-14	6.31864e-13	21.6606
BMF	-0.354286	6.61375	-5.90174	9.34699e-09	1.04376e-07	9.14229
HLX	-0.355229	5.26723	-5.29246	2.27506e-07	1.88465e-06	6.04705
CAPG	-0.355655	9.94666	-3.64406	0.000314092	0.00116404	-0.856028
PRKD3	-0.355831	7.01284	-7.32097	2.0945e-12	4.12759e-11	17.354
CISH	-0.355918	5.60996	-5.59341	4.85981e-08	4.67746e-07	7.5415
S100Z	-0.356323	2.00153	-5.34169	1.77541e-07	1.51086e-06	6.2868
IL10	-0.356472	3.78085	-6.59709	1.78873e-10	2.68026e-09	12.9993
TIMP4	-0.356808	4.10009	-3.13722	0.00186781	0.00543006	-2.51167
PMP2	-0.357236	2.07927	-2.9876	0.00303418	0.00820908	-2.95611
FAM53B	-0.357452	6.90613	-5.704	2.71121e-08	2.75775e-07	8.10769
EDNRA	-0.357982	7.55133	-3.58865	0.000385676	0.00139143	-1.04818
RHOQ	-0.358317	7.76414	-8.21942	5.4964e-15	1.41418e-13	23.1939
DERL3	-0.358579	6.27172	-3.39429	0.00077669	0.00255616	-1.70067
KLRC4	-0.358862	2.55663	-5.26751	2.57798e-07	2.10508e-06	5.92624
PARP15	-0.358904	7.06021	-4.91888	1.40887e-06	9.80791e-06	4.28858
SLC16A2	-0.359076	6.48771	-5.63576	3.89059e-08	3.81367e-07	7.75723
METTL7A	-0.359119	8.42427	-3.55141	0.000442111	0.00156757	-1.1758
HDC	-0.359147	3.6902	-3.94697	9.7785e-05	0.000422606	0.241867
CHSY1	-0.359225	7.81265	-5.70351	2.71828e-08	2.76173e-07	8.10516
GBP2	-0.3593	8.5208	-4.9056	1.50034e-06	1.0364e-05	4.22807
TRANK1	-0.359394	7.17168	-7.61693	3.1069e-13	6.64642e-12	19.227
FAM124A	-0.359472	3.80639	-6.73598	7.81408e-11	1.25372e-09	13.8089
TNFAIP8	-0.359672	6.38031	-5.74529	2.17562e-08	2.25339e-07	8.32135
IL27	-0.359839	0.940023	-4.39952	1.48953e-05	8.0625e-05	2.02874
ITPRIP	-0.360048	7.13603	-4.72611	3.46398e-06	2.19493e-05	3.42429
ADCY3	-0.360083	6.76599	-7.43767	9.92929e-13	2.02236e-11	18.0863
DDX58	-0.36025	7.38788	-5.11709	5.42455e-07	4.15939e-06	5.20802
KIT	-0.360305	6.11109	-3.83098	0.000154232	0.00062872	-0.187952
KIRREL1	-0.360327	7.64537	-4.7108	3.71614e-06	2.33298e-05	3.35689
SNN	-0.360414	6.76266	-6.46615	3.86093e-10	5.51789e-09	12.2477
PEA15	-0.360891	9.76155	-7.82769	7.74587e-14	1.79474e-12	20.5917
NID1	-0.361279	8.53831	-4.54698	7.78954e-06	4.56664e-05	2.64801
ESR1	-0.361287	4.1964	-7.81582	8.38138e-14	1.92885e-12	20.5142
THSD7B	-0.361548	4.12715	-3.62825	0.000333123	0.00122469	-0.911116
PZP	-0.361567	2.15615	-6.30647	9.71943e-10	1.29341e-08	11.3468
PALLD	-0.361589	9.43708	-4.38309	1.5994e-05	8.58078e-05	1.96085
CERS4	-0.36161	5.55164	-4.01714	7.38314e-05	0.00032974	0.507528
ADAMTS9	-0.361705	6.87652	-4.27053	2.58956e-05	0.000131251	1.50182
ADAMTSL4	-0.361789	5.92803	-3.90153	0.00011705	0.000494452	0.0720934
TCF21	-0.362162	4.71501	-4.79073	2.57027e-06	1.68328e-05	3.71071
TTC16	-0.362245	1.66077	-4.47138	1.08836e-05	6.13657e-05	2.32829
ANGPTL6	-0.362255	2.18365	-4.82963	2.14437e-06	1.42849e-05	3.88472
OTULINL	-0.36229	6.62103	-4.08451	5.61635e-05	0.000258784	0.766554
CCR3	-0.362293	1.8577	-3.87456	0.000130131	0.000541774	-0.0278381
LAMB1	-0.362382	10.1442	-5.48859	8.38176e-08	7.60489e-07	7.01325
SCN2B	-0.362402	2.98395	-4.52339	8.65054e-06	5.01944e-05	2.54775
SCN4B	-0.36338	5.0287	-4.33686	1.95186e-05	0.000102234	1.77101
RHOG	-0.363786	8.01424	-8.83868	7.15322e-17	2.19198e-15	27.4709
KLHL5	-0.364046	7.40278	-6.32675	8.65176e-10	1.15859e-08	11.4603
NPC2	-0.364054	9.76965	-6.73353	7.92992e-11	1.2711e-09	13.7945
AKAP7	-0.364226	5.65473	-3.06837	0.00234052	0.00658482	-2.71873
FAM180A	-0.364852	4.33018	-3.95946	9.30427e-05	0.000403359	0.288835
TIMP3	-0.365312	8.02445	-3.50031	0.00053221	0.00184094	-1.34889
NABP1	-0.365439	6.15811	-5.88889	1.0025e-08	1.11216e-07	9.0742
ATP6V0D2	-0.367336	3.20604	-4.34765	1.86346e-05	9.80745e-05	1.81518
MOB3A	-0.367515	7.16137	-8.44055	1.19179e-15	3.27445e-14	24.6989
CYSLTR2	-0.3677	3.81551	-5.46231	9.59737e-08	8.57711e-07	6.88209
DKK2	-0.368343	4.51507	-3.88003	0.000127371	0.000531842	-0.00761744
HTR2A	-0.368455	2.6131	-4.89853	1.55132e-06	1.06599e-05	4.19593
SEMA4D	-0.368562	6.52765	-7.33505	1.91492e-12	3.78686e-11	17.4419
LAMA4	-0.368565	8.40219	-4.80858	2.36556e-06	1.56369e-05	3.79041
SOAT1	-0.368791	7.9487	-6.48307	3.49781e-10	5.02851e-09	12.3442
TNFSF10	-0.368833	8.6898	-4.37164	1.68057e-05	8.94848e-05	1.91365
PTPRCAP	-0.369052	3.45803	-7.77204	1.12045e-13	2.53061e-12	20.2289
OSR2	-0.369062	4.89392	-4.21709	3.2437e-05	0.000160132	1.28761
ZNF366	-0.369127	4.25196	-6.34163	7.94297e-10	1.07296e-08	11.5436
GPC6	-0.36921	6.75971	-3.76231	0.000200954	0.000788743	-0.436934
MBNL1	-0.369243	8.79236	-8.28609	3.47574e-15	9.13632e-14	23.645
PROK2	-0.369307	1.18128	-3.81005	0.00016726	0.000674233	-0.264303
DOK5	-0.369624	5.27921	-3.68194	0.000272563	0.00103148	-0.723109
MS4A2	-0.3697	4.39621	-4.27673	2.52236e-05	0.000128245	1.52684
SYT11	-0.369975	6.98035	-4.74856	3.12398e-06	2.00488e-05	3.52342
PCDH17	-0.370379	6.03007	-4.73381	3.34364e-06	2.12819e-05	3.45822
C1QTNF1	-0.370411	7.43959	-5.14225	4.79556e-07	3.71902e-06	5.32691
IRF5	-0.370426	6.0141	-7.06456	1.04986e-11	1.88743e-10	15.7738
SSPN	-0.370453	7.08098	-4.94684	1.23359e-06	8.68358e-06	4.41642
BCL11B	-0.370669	5.09528	-4.83601	2.08135e-06	1.38814e-05	3.91338
ELOVL5	-0.371569	8.37779	-6.5452	2.42958e-10	3.56206e-09	12.7001
SLC2A5	-0.371653	4.71925	-3.8115	0.000166323	0.000671411	-0.259015
CARD9	-0.371701	3.99658	-5.78927	1.71863e-08	1.81545e-07	8.55035
SPART	-0.372042	7.24864	-6.00142	5.4083e-09	6.29562e-08	9.6745
KDR	-0.372355	6.75698	-5.41274	1.23733e-07	1.08639e-06	6.63614
TREML4	-0.372367	1.35973	-4.39021	1.5509e-05	8.36541e-05	1.99023
CAMK1D	-0.372809	6.76658	-5.45754	9.83565e-08	8.78083e-07	6.85834
GPR25	-0.3733	1.02298	-4.44689	1.21178e-05	6.72829e-05	2.2257
SCARF1	-0.373506	5.38233	-8.00578	2.35016e-14	5.71806e-13	21.7644
GPM6A	-0.373721	2.98873	-3.09986	0.00211213	0.00602296	-2.62458
LOXL1	-0.374055	7.48019	-4.06624	6.05098e-05	0.000276637	0.695925
DRAM1	-0.374169	7.03647	-7.00211	1.5454e-11	2.72641e-10	15.395
TDRD10	-0.374247	2.67772	-6.34316	7.87309e-10	1.06437e-08	11.5523
ALPK2	-0.374321	4.67272	-3.62511	0.000337034	0.00123875	-0.922045
FOXO1	-0.374376	7.86855	-5.58809	4.9971e-08	4.78792e-07	7.51448
PALM	-0.374812	6.00912	-4.61853	5.65237e-06	3.40524e-05	2.95495
NES	-0.375328	7.43839	-4.80552	2.39959e-06	1.58362e-05	3.77669
PARP14	-0.375605	8.87718	-5.9837	5.96365e-09	6.88553e-08	9.57939
LDB2	-0.375951	6.15543	-5.97066	6.40768e-09	7.3632e-08	9.50951
CAPN11	-0.376319	2.18416	-5.81535	1.49347e-08	1.59344e-07	8.68678
TMEM88	-0.376436	4.28092	-4.36251	1.74803e-05	9.2613e-05	1.87613
HHEX	-0.376496	6.1401	-3.79542	0.000176968	0.000707332	-0.317399
MYO9B	-0.376589	8.13428	-9.21675	4.61928e-18	1.56807e-16	30.1735
CRHBP	-0.376717	1.96186	-4.95257	1.20036e-06	8.48134e-06	4.4427
S1PR3	-0.376807	5.97174	-5.15941	4.40753e-07	3.44818e-06	5.40833
P4HA3	-0.377465	5.15923	-3.62951	0.000331567	0.00122002	-0.906733
CREM	-0.378132	6.31622	-6.28376	1.1068e-09	1.45018e-08	11.22
PXDN	-0.378235	7.77798	-3.86533	0.000134916	0.000558821	-0.0618808
GPX8	-0.378978	7.81052	-4.89549	1.57375e-06	1.07835e-05	4.18213
AGRP	-0.379322	2.06776	-3.76066	0.000202228	0.000793013	-0.442876
DCANP1	-0.379379	2.02114	-6.40047	5.65558e-10	7.8518e-09	11.8751
RNF130	-0.379753	7.37017	-8.87154	5.652e-17	1.75408e-15	27.7032
NLRP6	-0.379832	2.32398	-3.81832	0.00016199	0.000656412	-0.234165
AXL	-0.379902	8.34047	-4.48792	1.01195e-05	5.76555e-05	2.39783
OAF	-0.379954	7.86057	-5.30646	2.12055e-07	1.77394e-06	6.11503
PTK2B	-0.380041	7.18843	-6.88557	3.15936e-11	5.35068e-10	14.6949
TCF7	-0.380079	5.28148	-5.07706	6.59331e-07	4.95066e-06	5.01986
PCED1B	-0.380353	5.88133	-5.22978	3.11178e-07	2.49986e-06	5.74443
TMTC1	-0.380597	5.58596	-4.71241	3.68874e-06	2.31749e-05	3.36399
MAN1A1	-0.380958	8.7698	-4.2702	2.59316e-05	0.000131373	1.5005
TM4SF19	-0.381105	2.49716	-4.01519	7.4413e-05	0.000331902	0.500104
FCHSD2	-0.381134	7.23789	-9.10533	1.04269e-17	3.38416e-16	29.3702
BTG2	-0.38175	9.03344	-3.68566	0.000268774	0.00101896	-0.709979
PROCR	-0.38214	7.54256	-5.56779	5.55634e-08	5.25273e-07	7.41164
PLCL2	-0.382187	6.50507	-6.27874	1.13895e-09	1.48772e-08	11.1921
IFITM3	-0.382193	11.3615	-5.00841	9.18812e-07	6.68196e-06	4.70007
TBC1D9	-0.38233	7.4324	-6.1102	2.95373e-09	3.60618e-08	10.2634
SAMD11	-0.382545	5.16625	-4.20295	3.44162e-05	0.000168437	1.23132
SUSD2	-0.38256	6.23238	-3.62271	0.000340055	0.00124775	-0.930398
SEMA4A	-0.382735	5.47212	-5.59293	4.872e-08	4.68655e-07	7.53907
TSPAN4	-0.382744	6.96937	-6.41006	5.3501e-10	7.45201e-09	11.9293
CLEC4F	-0.383113	2.61162	-3.63474	0.000325182	0.00119887	-0.888526
GLUL	-0.383494	10.5954	-5.82486	1.41869e-08	1.52225e-07	8.73669
FAS	-0.383626	6.87325	-6.43129	4.72976e-10	6.63688e-09	12.0496
C5orf58	-0.383949	2.9038	-8.03301	1.95551e-14	4.81292e-13	21.9452
PRKAR2B	-0.385266	5.59425	-4.32797	2.02758e-05	0.000105582	1.73475
BTG1	-0.385769	9.29395	-6.59185	1.84503e-10	2.75975e-09	12.969
ZEB1	-0.386129	7.74766	-5.4798	8.77087e-08	7.93015e-07	6.9693
CALHM5	-0.386136	5.24487	-5.20812	3.46518e-07	2.759e-06	5.64055
ASGR2	-0.386713	2.24298	-4.48078	1.0443e-05	5.92212e-05	2.36776
CORO2B	-0.386773	4.25049	-4.98892	1.00894e-06	7.25541e-06	4.60995
RASGRP1	-0.387459	5.67086	-4.45994	1.14441e-05	6.39811e-05	2.28032
ITPR2	-0.387829	7.44248	-5.91732	8.58481e-09	9.64982e-08	9.225
EGFL7	-0.388214	6.99369	-4.4804	1.04606e-05	5.92826e-05	2.36616
PLXND1	-0.38858	8.01466	-6.709	9.18663e-11	1.45608e-09	13.6506
TBC1D4	-0.388811	7.13605	-6.48178	3.52422e-10	5.05792e-09	12.3368
KCNE1	-0.389111	2.46351	-5.42968	1.13465e-07	1.00192e-06	6.71999
PLA2G5	-0.389729	3.47202	-3.93609	0.000102103	0.000438169	0.201054
OSTM1	-0.389805	6.92853	-9.16569	6.71266e-18	2.21674e-16	29.8047
CX3CL1	-0.389883	7.05329	-4.06908	5.98141e-05	0.000273898	0.70688
ATP1A2	-0.390117	3.30431	-3.14579	0.00181557	0.0053108	-2.4856
NRP1	-0.390354	8.5975	-6.25294	1.31947e-09	1.71038e-08	11.0487
TMEM204	-0.390432	7.86347	-4.82829	2.1578e-06	1.43575e-05	3.87872
ADGRD1	-0.390552	4.93282	-4.36976	1.69426e-05	9.00727e-05	1.90591
APOBEC3C	-0.390986	6.79318	-5.71385	2.5728e-08	2.63113e-07	8.15855
HPGDS	-0.391082	4.76363	-4.68329	4.21405e-06	2.60897e-05	3.23632
DLC1	-0.391803	7.00863	-5.68157	3.05411e-08	3.06981e-07	7.9921
COL4A2	-0.391813	10.9021	-4.90206	1.52563e-06	1.05046e-05	4.21199
NEFH	-0.391907	3.44364	-5.30249	2.16333e-07	1.7991e-06	6.09573
AVPR1A	-0.392495	4.73808	-4.37094	1.68561e-05	8.96691e-05	1.91079
NLGN4X	-0.392962	4.02372	-4.01061	7.57987e-05	0.000337044	0.482647
POPDC2	-0.393062	4.47219	-5.07635	6.61632e-07	4.96483e-06	5.0165
DNAH8	-0.393289	1.96528	-5.54327	6.31377e-08	5.91291e-07	7.28777
SLC31A2	-0.393769	5.00948	-7.44465	9.49341e-13	1.94289e-11	18.1304
ARSI	-0.39381	4.68292	-3.37561	0.00082936	0.00269951	-1.7616
FBXL7	-0.394318	5.56625	-5.64711	3.66465e-08	3.61512e-07	7.81527
PDE3B	-0.39452	5.59067	-4.68636	4.15529e-06	2.57822e-05	3.24978
PTGIR	-0.395133	5.02501	-6.03472	4.49791e-09	5.31591e-08	9.8539
PIM1	-0.39516	8.18764	-5.14611	4.70538e-07	3.65408e-06	5.34523
ITIH3	-0.39518	4.27963	-4.50752	9.28041e-06	5.33757e-05	2.48055
ENPP6	-0.395214	2.29007	-6.82216	4.64578e-11	7.66352e-10	14.3175
KCNJ8	-0.395439	6.56468	-4.16313	4.0627e-05	0.000194085	1.07374
COL5A1	-0.395491	10.3589	-3.17421	0.00165192	0.00490828	-2.39867
TSPAN11	-0.395852	4.93422	-4.10972	5.06507e-05	0.000236393	0.864498
ADCY4	-0.396307	4.99482	-6.30418	9.84749e-10	1.30535e-08	11.334
KANK3	-0.396535	4.40299	-5.59381	4.8496e-08	4.67028e-07	7.54353
SESN1	-0.397061	6.90654	-5.73411	2.30951e-08	2.37903e-07	8.26336
MPO	-0.39737	1.77501	-6.7761	6.13767e-11	9.96024e-10	14.0451
NOTCH2	-0.397488	8.60333	-5.34164	1.77586e-07	1.51086e-06	6.28656
STK10	-0.398131	7.25571	-8.78127	1.07821e-16	3.2455e-15	27.0664
NIN	-0.398705	7.16711	-7.78184	1.05004e-13	2.38106e-12	20.2927
MAP1LC3C	-0.398918	4.64519	-6.32279	8.85095e-10	1.1834e-08	11.4381
BST1	-0.39972	5.52814	-5.67969	3.0846e-08	3.09497e-07	7.98246
RAB8B	-0.399721	7.62552	-8.28346	3.53941e-15	9.2893e-14	23.6272
CD5L	-0.399738	0.838046	-3.50074	0.000531397	0.00183988	-1.34746
ABCA1	-0.399764	7.64905	-5.83656	1.33181e-08	1.43719e-07	8.7981
NINJ1	-0.399888	7.61086	-7.8822	5.38655e-14	1.27058e-12	20.9488
SEMA3C	-0.399936	8.5635	-3.51554	0.000503713	0.00175798	-1.29756
RNF122	-0.400217	5.78602	-5.90509	9.17752e-09	1.02618e-07	9.16008
ANXA2R	-0.400267	4.15673	-5.61649	4.30568e-08	4.18438e-07	7.6589
AKR1B1	-0.40036	7.83618	-6.80885	5.03552e-11	8.25835e-10	14.2387
DPYD	-0.400489	7.61769	-5.35839	1.6315e-07	1.39961e-06	6.36856
DACT1	-0.400795	6.85064	-5.19298	3.73484e-07	2.95297e-06	5.56819
EGR1	-0.40094	9.21625	-3.13823	0.00186162	0.00541493	-2.50862
AFF3	-0.401142	4.05708	-4.28334	2.45265e-05	0.000124962	1.55351
BACH2	-0.40122	4.56535	-5.44587	1.04434e-07	9.27469e-07	6.80029
SOD3	-0.403033	7.03382	-3.80707	0.000169194	0.000680376	-0.275126
MRGPRF	-0.403064	5.45617	-4.01744	7.37429e-05	0.000329518	0.508664
HEMGN	-0.403727	0.995472	-4.79373	2.53479e-06	1.66381e-05	3.72405
P2RX1	-0.404084	4.45049	-2.95081	0.00340875	0.0090795	-3.06225
ISM1	-0.404291	6.29658	-3.06395	0.00237434	0.0066624	-2.73187
ANTXR1	-0.40565	9.44734	-3.4978	0.000537061	0.00185496	-1.35735
COL16A1	-0.405959	8.86304	-4.66612	4.55673e-06	2.80224e-05	3.16138
SLC43A3	-0.406279	7.03353	-6.22105	1.58167e-09	2.02556e-08	10.872
MFSD1	-0.406737	8.37658	-10.0403	9.56824e-21	3.87446e-19	36.2763
UBE2E2	-0.406802	6.04661	-6.57566	2.03024e-10	3.02615e-09	12.8755
B2M	-0.407066	13.6801	-5.31428	2.0387e-07	1.71052e-06	6.15309
SLFN14	-0.407426	1.53958	-6.9601	2.00178e-11	3.47037e-10	15.1416
CHRNA6	-0.407538	2.21757	-6.04242	4.30973e-09	5.10415e-08	9.8955
ARSB	-0.407761	6.22544	-8.25701	4.24614e-15	1.10957e-13	23.448
PHACTR1	-0.407901	4.32718	-7.26974	2.8995e-12	5.6292e-11	17.035
RAB3IL1	-0.408349	5.99217	-5.8755	1.07826e-08	1.18601e-07	9.00338
MYBPC2	-0.408512	1.73213	-3.9286	0.000105181	0.000450232	0.173009
STEAP4	-0.408679	6.3118	-4.02346	7.19723e-05	0.00032222	0.531663
LMCD1	-0.40891	7.21842	-5.59951	4.70694e-08	4.54318e-07	7.57249
TENM3	-0.409061	6.29382	-4.99225	9.92938e-07	7.1585e-06	4.62535
PLPP1	-0.409209	7.75438	-6.67265	1.14162e-10	1.78452e-09	13.4382
CCDC102B	-0.409598	5.32342	-6.39085	5.97945e-10	8.27441e-09	11.8207
GPIHBP1	-0.41049	3.31868	-4.48392	1.02996e-05	5.85447e-05	2.38097
MCUB	-0.410519	6.44946	-7.66577	2.25676e-13	4.90176e-12	19.541
LITAF	-0.410702	9.3548	-7.73565	1.42503e-13	3.18052e-12	19.9926
SLFN5	-0.410771	7.87813	-5.75433	2.0729e-08	2.16016e-07	8.36832
GNLY	-0.411379	3.82705	-3.66326	0.000292348	0.00109514	-0.788806
NUDT10	-0.411439	3.35031	-4.3511	1.83607e-05	9.67352e-05	1.82929
DENND5A	-0.411501	7.42229	-9.03479	1.74093e-17	5.53422e-16	28.8645
PTPN5	-0.411546	2.26335	-4.0392	6.75334e-05	0.000304168	0.591922
LEF1	-0.411616	6.53426	-4.84216	2.02233e-06	1.35355e-05	3.94103
IRF1	-0.41162	7.57294	-6.97747	1.7989e-11	3.14429e-10	15.2463
FCN3	-0.41187	3.36048	-4.3478	1.86228e-05	9.80551e-05	1.81578
NXPE3	-0.412188	5.69909	-7.34571	1.78918e-12	3.55474e-11	17.5085
MAF	-0.41237	7.19693	-6.32107	8.93856e-10	1.19323e-08	11.4284
PIK3IP1	-0.412407	8.26709	-6.46294	3.93403e-10	5.60822e-09	12.2294
CALHM2	-0.412462	6.48185	-7.443	9.59447e-13	1.96122e-11	18.12
BHMT2	-0.412563	5.08958	-6.84697	3.99625e-11	6.66316e-10	14.4649
RGS2	-0.412976	8.53832	-3.99057	8.21587e-05	0.00036068	0.406435
BICC1	-0.413435	7.873	-4.12738	4.71007e-05	0.00022116	0.93342
S1PR2	-0.413506	6.047	-8.42417	1.33577e-15	3.66411e-14	24.5866
NRXN2	-0.414503	4.455	-4.79141	2.56225e-06	1.67924e-05	3.7137
LRRC18	-0.41457	2.38052	-7.60669	3.32181e-13	7.04415e-12	19.1613
COTL1	-0.415468	8.65091	-6.30318	9.90384e-10	1.3118e-08	11.3284
PTGER3	-0.415776	4.79522	-4.90749	1.48696e-06	1.02841e-05	4.23669
CSTA	-0.416953	5.83384	-3.39064	0.000786712	0.00258443	-1.71258
GADD45B	-0.416971	8.60872	-5.46694	9.37153e-08	8.40525e-07	6.90515
PPM1K	-0.417209	6.06916	-6.76327	6.63108e-11	1.07302e-09	13.9694
LGALS9	-0.417542	7.96748	-5.21013	3.43071e-07	2.73284e-06	5.6502
HAS2	-0.417817	5.40971	-3.68776	0.000266659	0.00101162	-0.70257
AGTR2	-0.417845	1.09302	-3.77029	0.000194908	0.000768737	-0.408213
CHST2	-0.417897	4.89071	-5.86619	1.13425e-08	1.24106e-07	8.95417
DOC2B	-0.418576	4.63827	-4.49443	9.83331e-06	5.61569e-05	2.42525
ADAM23	-0.418609	4.42311	-5.12995	5.09374e-07	3.9252e-06	5.26872
RELN	-0.41974	4.41304	-3.18306	0.00160378	0.00478265	-2.37144
COL4A1	-0.41974	11.087	-4.77124	2.81328e-06	1.82199e-05	3.62397
MAS1L	-0.419933	0.951011	-5.01687	8.82158e-07	6.43623e-06	4.73928
RBMS3	-0.420057	6.20558	-5.96433	6.63471e-09	7.60353e-08	9.47564
CDO1	-0.420299	5.13131	-3.71557	0.000240086	0.000923371	-0.604069
GALNT16	-0.420457	3.98866	-3.89669	0.000119303	0.000502658	0.0541035
GPRIN3	-0.420634	6.19327	-6.12936	2.65296e-09	3.26712e-08	10.368
RAB39A	-0.420639	2.94226	-6.74093	7.58522e-11	1.2193e-09	13.838
FLNA	-0.42074	11.4507	-4.28544	2.43084e-05	0.000123962	1.56201
GLT1D1	-0.420953	2.89812	-5.00418	9.37692e-07	6.80347e-06	4.68048
GHR	-0.421312	4.58904	-5.23357	3.05359e-07	2.46125e-06	5.76267
PDGFRB	-0.421773	9.69692	-5.07079	6.79714e-07	5.08351e-06	4.99051
OTOA	-0.42181	2.19437	-7.20144	4.46208e-12	8.43185e-11	16.6123
IFI44	-0.421843	8.0337	-3.81452	0.00016439	0.000665189	-0.248014
TMEM140	-0.422066	7.31554	-9.72446	1.05714e-19	4.02209e-18	33.9027
NFATC1	-0.422303	5.30352	-4.76084	2.95192e-06	1.90164e-05	3.57779
CRYBG1	-0.422653	7.48591	-5.06565	6.96881e-07	5.19818e-06	4.96647
TGFBR3	-0.423003	6.62065	-4.61679	5.69693e-06	3.42723e-05	2.94743
HERC5	-0.42306	5.95596	-5.38026	1.46007e-07	1.2592e-06	6.47596
LRRN2	-0.423189	4.58074	-5.15698	4.46071e-07	3.47678e-06	5.39676
BEND4	-0.423684	2.16975	-4.25937	2.7148e-05	0.000137086	1.45688
CLIC4	-0.42427	9.68548	-5.33545	1.83226e-07	1.55031e-06	6.25632
DUSP5	-0.42472	7.98794	-3.91476	0.000111097	0.000471886	0.121346
ITPR1	-0.424815	6.76347	-6.66724	1.17912e-10	1.8347e-09	13.4066
DPEP3	-0.426407	1.06447	-4.80273	2.43086e-06	1.60177e-05	3.76426
ECHDC3	-0.426477	4.69586	-3.68447	0.000269986	0.00102309	-0.714198
CCDC88B	-0.426756	6.05066	-5.47773	8.86494e-08	8.0067e-07	6.95897
PRDM1	-0.427091	6.58529	-5.86516	1.14057e-08	1.24664e-07	8.94876
IL6R	-0.427187	6.48966	-5.41416	1.22842e-07	1.07912e-06	6.64313
RCN3	-0.427221	8.23259	-4.91425	1.44011e-06	1.00049e-05	4.26748
IFFO1	-0.427865	5.99302	-7.81076	8.66811e-14	1.9841e-12	20.4812
NOD2	-0.427893	4.73063	-5.45698	9.86391e-08	8.79683e-07	6.85556
IL2	-0.427994	1.04962	-5.46793	9.32371e-08	8.37214e-07	6.9101
CCDC8	-0.428235	6.44007	-5.32358	1.94536e-07	1.63948e-06	6.1984
LRP1	-0.428245	10.0629	-5.38198	1.44736e-07	1.2495e-06	6.48442
FRZB	-0.429074	6.91062	-3.6677	0.000287528	0.00107947	-0.773225
ISG15	-0.429122	8.87393	-2.95439	0.00337051	0.00899454	-3.05197
SCARA3	-0.429143	6.68918	-4.85518	1.90255e-06	1.27993e-05	3.99971
F2RL3	-0.429409	5.84401	-4.46679	1.11053e-05	6.23739e-05	2.30902
SWAP70	-0.429686	7.81488	-9.21136	4.80541e-18	1.628e-16	30.1345
GRK3	-0.429703	6.68643	-7.46543	8.30445e-13	1.70985e-11	18.2617
ZNF804A	-0.430041	2.35337	-9.51647	5.03317e-19	1.84084e-17	32.3616
TNFRSF4	-0.430095	4.42961	-4.79011	2.57767e-06	1.68674e-05	3.70794
MYL9	-0.431379	10.0819	-4.37849	1.63155e-05	8.73946e-05	1.94188
SLC8A1	-0.431581	5.22647	-7.08455	9.27173e-12	1.67571e-10	15.8955
LGMN	-0.432928	9.41695	-7.81087	8.6617e-14	1.9841e-12	20.4819
CLEC11A	-0.433722	7.44	-5.05744	7.25196e-07	5.39519e-06	4.92808
GPR15	-0.433957	2.58301	-3.71913	0.000236871	0.000913276	-0.591411
EFEMP2	-0.434171	7.81915	-5.65868	3.44748e-08	3.41874e-07	7.87453
SPHK1	-0.434188	6.80505	-4.39716	1.50486e-05	8.13516e-05	2.01897
KLRC1	-0.434732	2.76815	-5.28507	2.361e-07	1.94448e-06	6.01121
CLDN5	-0.434798	5.82677	-4.40599	1.44828e-05	7.8906e-05	2.05553
MAP1B	-0.43499	7.766	-4.66888	4.4999e-06	2.77181e-05	3.17341
PSAP	-0.435025	12.8844	-8.4133	1.44075e-15	3.92673e-14	24.5121
CD163L1	-0.435372	5.11156	-4.95118	1.20837e-06	8.53079e-06	4.43631
CD274	-0.435385	4.81763	-5.74598	2.16759e-08	2.24645e-07	8.32494
IL18R1	-0.435457	5.23524	-6.27501	1.16346e-09	1.51857e-08	11.1714
ROBO1	-0.435514	6.80115	-6.42607	4.87544e-10	6.82442e-09	12.0199
EGR3	-0.43627	5.47473	-3.44571	0.000647339	0.00217446	-1.5313
PSTPIP2	-0.436578	6.01402	-7.23231	3.67342e-12	7.01954e-11	16.803
ENTPD1	-0.437015	7.55079	-9.20443	5.05594e-18	1.70947e-16	30.0843
PLEKHF1	-0.437295	5.67284	-5.99585	5.57702e-09	6.47429e-08	9.64461
VASH1	-0.437348	6.80195	-7.04279	1.20163e-11	2.1444e-10	15.6415
BNC2	-0.437782	5.74556	-5.56504	5.63663e-08	5.32272e-07	7.39773
TSPAN32	-0.437803	2.69192	-6.05482	4.02299e-09	4.79461e-08	9.96253
LYN	-0.438116	7.55972	-7.96244	3.14641e-14	7.53786e-13	21.4775
HOPX	-0.438794	7.28736	-4.676	4.35634e-06	2.69216e-05	3.20449
RASGRP3	-0.438876	5.70155	-8.97074	2.76737e-17	8.69958e-16	28.4074
KCNK13	-0.438941	2.97453	-6.292	1.05586e-09	1.38986e-08	11.266
RAB32	-0.439089	7.56028	-7.02682	1.32657e-11	2.35746e-10	15.5446
IL6ST	-0.439785	9.43175	-7.08055	9.50545e-12	1.71249e-10	15.8711
CLEC14A	-0.440203	6.67817	-7.13222	6.88765e-12	1.26636e-10	16.1868
GUCY1A1	-0.440212	7.38522	-5.23587	3.01896e-07	2.4345e-06	5.77368
MCTP1	-0.440275	5.53413	-6.93295	2.36466e-11	4.06631e-10	14.9785
MMD	-0.441077	6.76055	-6.56267	2.19198e-10	3.23883e-09	12.8006
NCR1	-0.441129	1.3889	-5.76865	1.91982e-08	2.01049e-07	8.44282
IL9R	-0.441375	2.8244	-7.22811	3.77212e-12	7.19198e-11	16.777
SERPINF2	-0.441469	4.98447	-4.35281	1.82257e-05	9.60832e-05	1.83632
TNFAIP2	-0.441942	9.0752	-4.27679	2.52175e-05	0.000128245	1.52707
PPM1M	-0.442117	6.59774	-11.3903	2.23349e-25	1.24951e-23	46.8267
XIRP1	-0.442445	3.57012	-3.33379	0.000959597	0.00306371	-1.89688
ADD2	-0.442558	3.56281	-5.11273	5.54145e-07	4.22806e-06	5.18745
CEACAM3	-0.442984	2.30452	-5.22355	3.2097e-07	2.57123e-06	5.71451
TMEM100	-0.443096	4.5498	-4.28092	2.47792e-05	0.000126211	1.54376
ST6GAL1	-0.443296	7.47811	-4.9906	1.00087e-06	7.20042e-06	4.61768
CYBA	-0.443306	9.21614	-4.83677	2.07392e-06	1.38427e-05	3.91682
AMPD1	-0.444262	2.3429	-3.91951	0.000109032	0.000464155	0.139063
MAN2B1	-0.444633	8.36228	-10.3875	6.53028e-22	2.84042e-20	38.9302
ATP6V1B2	-0.444662	8.24656	-10.5502	1.82868e-22	8.22761e-21	40.1889
HSF5	-0.444706	1.45255	-6.67062	1.15553e-10	1.80294e-09	13.4263
COL8A2	-0.444874	7.3205	-3.64557	0.000312324	0.00115826	-0.850739
FERMT2	-0.444925	7.49698	-6.13403	2.58432e-09	3.1872e-08	10.3935
GDF6	-0.445883	3.54971	-5.71993	2.49095e-08	2.5551e-07	8.18994
COL23A1	-0.446002	2.89674	-6.61719	1.58786e-10	2.40151e-09	13.1157
GPR55	-0.446255	2.3858	-6.36493	6.94528e-10	9.50268e-09	11.6746
TNFSF4	-0.44632	5.55308	-4.47715	1.06111e-05	5.99941e-05	2.35251
SCRG1	-0.446453	3.6241	-4.41937	1.36645e-05	7.48202e-05	2.11103
NINJ2	-0.446519	5.24009	-5.74057	2.23115e-08	2.3039e-07	8.29688
PSMA8	-0.446939	0.656025	-5.56475	5.64514e-08	5.3278e-07	7.39627
TXLNB	-0.447191	3.39467	-7.4807	7.5254e-13	1.55888e-11	18.3584
SEMA6B	-0.447254	5.94156	-6.16638	2.15443e-09	2.69613e-08	10.5708
HSD17B14	-0.44727	5.55838	-5.27815	2.44437e-07	2.00828e-06	5.97767
FZD4	-0.447328	6.89253	-7.17193	5.37105e-12	1.0027e-10	16.4306
ADAMTS3	-0.448124	3.59468	-8.34007	2.39431e-15	6.39247e-14	24.012
ARL4C	-0.44831	8.73159	-4.72042	3.55564e-06	2.24548e-05	3.39924
ATP8B4	-0.448896	4.80608	-10.6637	7.48758e-23	3.43238e-21	41.0722
TNC	-0.448969	7.79003	-3.01296	0.00279839	0.00768484	-2.88223
FLRT2	-0.449015	6.1158	-3.98595	8.36932e-05	0.000366753	0.388937
GLDN	-0.450469	4.39036	-4.38711	1.57185e-05	8.45429e-05	1.97743
SPIC	-0.450989	0.763353	-5.31571	2.0241e-07	1.69911e-06	6.16004
TMEM150C	-0.451536	5.35979	-6.44416	4.38874e-10	6.20959e-09	12.1226
PDE1A	-0.451579	5.93064	-6.28217	1.11687e-09	1.46225e-08	11.2112
ITPRIPL1	-0.451672	3.15326	-8.15012	8.82887e-15	2.22778e-13	22.7275
C1orf54	-0.452369	6.3455	-8.38255	1.78391e-15	4.83874e-14	24.3017
ASPA	-0.453182	3.2203	-5.58589	5.05491e-08	4.83514e-07	7.50333
TIAM1	-0.453874	5.91373	-6.44614	4.33846e-10	6.15382e-09	12.1339
COLEC11	-0.454337	5.82081	-3.16607	0.00169733	0.00501678	-2.42364
MMRN2	-0.454437	6.73144	-7.68251	2.02195e-13	4.44856e-12	19.6489
NNMT	-0.454742	9.87622	-4.77932	2.71003e-06	1.76116e-05	3.65986
CX3CR1	-0.455603	4.26746	-3.85227	0.000141975	0.000584215	-0.109942
ALOX5	-0.455657	8.33079	-4.77438	2.77274e-06	1.79985e-05	3.6379
LCN10	-0.455792	1.97537	-4.73911	3.26302e-06	2.08233e-05	3.48163
VWF	-0.456273	8.60827	-6.43955	4.50798e-10	6.35189e-09	12.0964
PRICKLE1	-0.457571	5.8017	-6.05244	4.07641e-09	4.84131e-08	9.94968
DTX1	-0.457579	5.86462	-5.99493	5.60561e-09	6.49861e-08	9.63963
MAP3K3	-0.457742	7.07004	-10.511	2.48774e-22	1.1134e-20	39.8845
TENT5C	-0.458032	7.19712	-3.90912	0.000113598	0.000481185	0.10034
PPT1	-0.458075	9.26636	-10.0937	6.34905e-21	2.58941e-19	36.6816
VAV3	-0.45838	5.51099	-5.23145	3.08608e-07	2.48325e-06	5.75245
KIAA1755	-0.458428	5.17556	-7.00074	1.55851e-11	2.74385e-10	15.3868
PVALB	-0.458449	1.38023	-4.80848	2.36664e-06	1.56369e-05	3.78997
HSPA12B	-0.458584	5.32907	-7.10646	8.08937e-12	1.47298e-10	16.0292
ICAM2	-0.45916	5.91809	-6.99239	1.64085e-11	2.87988e-10	15.3363
CD81	-0.45942	9.76925	-7.74235	1.36343e-13	3.05104e-12	20.0361
EMP1	-0.459959	9.28515	-4.54607	7.82101e-06	4.5803e-05	2.64415
SAMD3	-0.460338	3.61592	-7.77543	1.09559e-13	2.48104e-12	20.251
TNFSF12	-0.460413	6.93496	-9.45256	8.10019e-19	2.90633e-17	31.8918
MXRA8	-0.460547	9.19101	-4.54142	7.98475e-06	4.66655e-05	2.62433
STAC	-0.461012	3.94929	-3.76855	0.000196216	0.000773398	-0.414503
CYTL1	-0.461448	3.24383	-5.12395	5.2455e-07	4.03301e-06	5.2404
ENPP2	-0.461462	7.61154	-4.37015	1.69141e-05	8.99495e-05	1.90752
UCP2	-0.461602	7.23281	-5.57708	5.29314e-08	5.02627e-07	7.45868
NFKBIA	-0.461655	9.56497	-8.25753	4.23099e-15	1.10873e-13	23.4515
IL12B	-0.461832	1.41733	-5.51385	7.35524e-08	6.78366e-07	7.13982
ID3	-0.462063	8.25916	-5.87744	1.06698e-08	1.17527e-07	9.0136
SLC7A7	-0.462224	7.31779	-6.00517	5.29737e-09	6.17918e-08	9.69467
INHBA	-0.462305	8.54645	-3.61146	0.000354525	0.00129331	-0.969401
MGAT4A	-0.462415	7.47837	-8.22201	5.39975e-15	1.39142e-13	23.2114
ADAMTS2	-0.462817	8.31457	-5.1586	4.42519e-07	3.45547e-06	5.40448
CXCL2	-0.463158	6.232	-3.19013	0.00156624	0.00468469	-2.34962
OR52N4	-0.463274	1.86295	-5.46303	9.56178e-08	8.5498e-07	6.88569
C4B	-0.463676	6.31389	-4.12397	4.77683e-05	0.000224109	0.92007
DYSF	-0.46396	6.09201	-7.10275	8.27849e-12	1.50419e-10	16.0065
NUPR1	-0.464009	7.47313	-5.04336	7.76348e-07	5.74059e-06	4.86239
ENG	-0.464054	8.61982	-7.16056	5.76811e-12	1.07094e-10	16.3606
FHL5	-0.464153	5.30801	-4.3261	2.04387e-05	0.000106235	1.72713
MX1	-0.464245	8.1853	-3.80288	0.000171954	0.000689723	-0.290354
NLRP4	-0.464301	0.676171	-5.1669	4.24812e-07	3.33326e-06	5.44389
ID4	-0.46452	6.33266	-5.11575	5.46018e-07	4.17729e-06	5.20171
RASGRP4	-0.464623	4.26492	-10.7387	4.14187e-23	1.92988e-21	41.6579
IFNGR1	-0.464631	9.28721	-9.76292	7.90679e-20	3.06311e-18	34.1896
MEFV	-0.464997	4.13606	-10.31	1.19405e-21	5.06413e-20	38.3335
CR1L	-0.465183	1.1351	-5.99064	5.73987e-09	6.6452e-08	9.6166
RECK	-0.465442	5.9408	-7.03945	1.22677e-11	2.18468e-10	15.6212
GBGT1	-0.465474	5.31628	-9.11728	9.55747e-18	3.11387e-16	29.4561
SIPA1	-0.465686	7.31186	-7.93676	3.73858e-14	8.90504e-13	21.3079
RAB42	-0.466154	5.11735	-6.60185	1.73899e-10	2.61263e-09	13.0268
PTGDR	-0.466485	3.3527	-7.96242	3.14687e-14	7.53786e-13	21.4773
SNAI3	-0.466635	3.99943	-6.77437	6.2019e-11	1.00549e-09	14.0349
HCAR3	-0.466885	2.79543	-3.51173	0.000510706	0.0017778	-1.31042
CEBPE	-0.466886	1.51682	-5.86945	1.11431e-08	1.22107e-07	8.97141
COPZ2	-0.468304	6.60638	-5.60961	4.46399e-08	4.32095e-07	7.62388
FREM1	-0.468641	5.16011	-4.34925	1.85067e-05	9.74742e-05	1.82174
HEYL	-0.468964	7.47733	-4.29815	2.3029e-05	0.000118182	1.61348
COL1A1	-0.46923	13.1981	-3.05559	0.00243954	0.00682838	-2.75668
SCN4A	-0.469403	1.56605	-6.24977	1.3435e-09	1.73796e-08	11.0311
GP1BA	-0.469518	2.62459	-5.1181	5.39776e-07	4.14259e-06	5.21279
LCN6	-0.470167	1.16311	-4.5193	8.80909e-06	5.101e-05	2.53038
MAP3K8	-0.470331	6.53732	-7.35418	1.69506e-12	3.37958e-11	17.5615
RASSF5	-0.470808	7.19923	-7.49304	6.94874e-13	1.44648e-11	18.4366
FILIP1L	-0.471341	8.07599	-5.8754	1.07883e-08	1.18601e-07	9.00286
ARHGEF15	-0.47158	4.80367	-7.12641	7.14235e-12	1.31177e-10	16.1512
CAVIN1	-0.471865	10.2249	-6.36728	6.85176e-10	9.38984e-09	11.6878
ADGRE2	-0.471911	4.6421	-7.33701	1.89125e-12	3.74878e-11	17.4541
CPM	-0.473	7.02759	-5.46686	9.37541e-08	8.40525e-07	6.90475
TTYH2	-0.473195	4.97421	-7.75751	1.23344e-13	2.77109e-12	20.1345
ZNF521	-0.473276	6.20036	-5.93365	7.85088e-09	8.87765e-08	9.31192
TLL1	-0.47336	4.15608	-6.3976	5.75042e-10	7.97694e-09	11.8588
PI15	-0.473847	5.12512	-3.91059	0.000112944	0.000478873	0.105783
KLRC4-KLRK1	-0.474148	1.76281	-4.76406	2.90832e-06	1.87426e-05	3.59207
SYNPO2	-0.474231	6.96865	-3.97025	8.91193e-05	0.000387535	0.329551
GAP43	-0.47459	4.37943	-4.36096	1.75976e-05	9.31184e-05	1.86975
PLVAP	-0.474637	9.10373	-6.64339	1.35907e-10	2.08232e-09	13.2677
SOX17	-0.474657	3.94853	-6.189	1.89634e-09	2.39251e-08	10.6951
IDO2	-0.474658	1.41726	-6.93527	2.33126e-11	4.02106e-10	14.9924
GRAP	-0.474852	4.02023	-8.05332	1.70442e-14	4.21324e-13	22.0804
RARRES2	-0.477134	9.10063	-4.59167	6.37842e-06	3.79558e-05	2.83925
HLA-E	-0.478709	11.7627	-9.16577	6.70887e-18	2.21674e-16	29.8052
CCDC3	-0.478724	6.32376	-5.67727	3.12445e-08	3.12942e-07	7.97
SERPINB9	-0.478901	7.57338	-7.41544	1.14532e-12	2.32163e-11	17.9462
BTN3A2	-0.478999	7.4444	-7.37461	1.48765e-12	2.99769e-11	17.6896
BTN3A1	-0.479101	7.55406	-8.50593	7.54871e-16	2.10806e-14	25.1487
TCF4	-0.479547	7.38004	-7.4396	9.8065e-13	2.00215e-11	18.0985
DAZL	-0.479625	0.873746	-5.85476	1.2068e-08	1.30977e-07	8.8939
XCL1	-0.479904	2.54923	-4.71261	3.68542e-06	2.31705e-05	3.36485
EDNRB	-0.479966	6.02642	-5.17597	4.0623e-07	3.1985e-06	5.48706
GLI1	-0.48026	5.34264	-6.18774	1.90978e-09	2.4059e-08	10.6882
FIBIN	-0.480708	6.88553	-3.88964	0.000122656	0.000515192	0.0279547
GLT8D2	-0.480899	6.81204	-5.39298	1.36852e-07	1.18929e-06	6.53862
PTPN22	-0.480945	5.46907	-7.11038	7.89393e-12	1.44047e-10	16.0532
SIRPD	-0.481062	1.09536	-7.67736	2.0915e-13	4.57787e-12	19.6157
NDN	-0.481435	7.07191	-6.43981	4.50123e-10	6.34763e-09	12.0979
CNN3	-0.481464	9.74552	-6.86512	3.57871e-11	6.01414e-10	14.5729
HACD4	-0.4826	5.45794	-9.24645	3.7148e-18	1.2789e-16	30.3885
ANKRD33B	-0.482772	4.0404	-7.79241	9.79026e-14	2.22895e-12	20.3615
PLAU	-0.483483	9.58511	-3.50062	0.000531618	0.00183989	-1.34785
ZNF518B	-0.483675	5.42915	-7.85892	6.29174e-14	1.4658e-12	20.7961
SLCO2A1	-0.484095	7.15209	-4.50895	9.22206e-06	5.3076e-05	2.48658
BFSP2	-0.484961	1.12157	-5.74611	2.16613e-08	2.24631e-07	8.3256
WNT2	-0.485056	5.93866	-3.55138	0.00044215	0.00156757	-1.17589
CNN1	-0.485439	7.22635	-3.49355	0.000545352	0.00187939	-1.37163
PRG4	-0.48546	4.01261	-4.47412	1.07533e-05	6.07178e-05	2.33979
PHOSPHO1	-0.485743	2.93835	-8.62069	3.36934e-16	9.72875e-15	25.9435
TCN2	-0.485865	7.39794	-8.0765	1.45671e-14	3.62198e-13	22.2349
CD302	-0.485889	5.99147	-4.82456	2.19572e-06	1.4587e-05	3.86198
MRC2	-0.485905	8.6687	-5.07554	6.64239e-07	4.97872e-06	5.01271
SH3BP5	-0.486285	6.11637	-7.36758	1.55611e-12	3.12483e-11	17.6454
STAC3	-0.486618	4.34163	-8.63401	3.06696e-16	8.88581e-15	26.0361
BATF3	-0.486627	3.77262	-8.11305	1.13649e-14	2.83823e-13	22.4791
MDFIC	-0.486672	7.35543	-7.26991	2.89627e-12	5.6292e-11	17.0361
QKI	-0.4868	7.53533	-9.56198	3.58266e-19	1.31599e-17	32.6973
HAMP	-0.486907	2.97675	-4.4429	1.23312e-05	6.83117e-05	2.20903
LGI2	-0.487889	4.63458	-5.8519	1.22566e-08	1.32938e-07	8.87883
GPR132	-0.488205	5.56917	-5.90739	9.06319e-09	1.01406e-07	9.17227
DHH	-0.488223	2.42485	-6.96768	1.91053e-11	3.32469e-10	15.1873
NID2	-0.488998	6.67663	-5.50717	7.61435e-08	6.98475e-07	7.10627
HLA-B	-0.489088	13.0734	-5.82201	1.44076e-08	1.54204e-07	8.72169
BST2	-0.489319	9.823	-4.86509	1.81606e-06	1.22416e-05	4.04443
PGM5	-0.489493	4.84013	-4.56894	7.06248e-06	4.16909e-05	2.74175
LRRC8C	-0.48953	5.92257	-9.38247	1.36246e-18	4.82736e-17	31.3785
ADPRH	-0.4902	5.80839	-11.4069	1.95056e-25	1.09845e-23	46.9608
TAP1	-0.490339	8.78044	-6.07016	3.69378e-09	4.44273e-08	10.0456
GFI1	-0.490475	4.35302	-5.41236	1.23978e-07	1.08797e-06	6.63422
LZTS1	-0.491044	6.08408	-6.38817	6.07286e-10	8.38321e-09	11.8056
HGF	-0.491831	5.37889	-6.55111	2.34649e-10	3.44618e-09	12.7341
RAB39B	-0.492084	3.48141	-4.68738	4.13616e-06	2.56916e-05	3.25421
RARRES1	-0.492379	7.96098	-3.80017	0.000173758	0.000695937	-0.300173
LGALS1	-0.492433	11.2347	-5.04462	7.71629e-07	5.71066e-06	4.86826
THRSP	-0.492624	1.69694	-3.78665	0.000183043	0.000728873	-0.349152
PALMD	-0.492772	5.33394	-6.71382	8.92514e-11	1.4186e-09	13.6789
CD68	-0.493081	6.47361	-7.82848	7.70522e-14	1.78776e-12	20.5969
HIC1	-0.493088	5.68596	-7.0196	1.38714e-11	2.45741e-10	15.5009
RAB33A	-0.493263	3.44986	-6.79257	5.5567e-11	9.06936e-10	14.1424
AEBP1	-0.493353	10.942	-4.13947	4.48094e-05	0.000210926	0.980736
HEG1	-0.49371	8.02267	-6.55369	2.31111e-10	3.40304e-09	12.7489
ADAM19	-0.493768	7.04381	-4.87302	1.74959e-06	1.18594e-05	4.08028
CETP	-0.493771	3.0185	-5.19203	3.75249e-07	2.96417e-06	5.56364
RNF166	-0.494047	5.96361	-10.2559	1.81605e-21	7.62607e-20	37.9189
SLC47A1	-0.494263	3.63677	-6.2057	1.72534e-09	2.1914e-08	10.7872
ADAMTS8	-0.494295	3.86692	-3.63812	0.000321115	0.00118535	-0.876739
MICB	-0.494419	5.08953	-5.87971	1.05386e-08	1.16534e-07	9.02563
GHRL	-0.494455	3.88951	-3.6727	0.000282189	0.00106251	-0.755653
ITGA5	-0.494495	8.70838	-5.1314	5.05768e-07	3.89918e-06	5.27557
UBE2L6	-0.494995	8.70485	-8.54429	5.76875e-16	1.63515e-14	25.4137
OGFRL1	-0.495143	7.19073	-9.60421	2.61151e-19	9.67626e-18	33.0095
NRN1	-0.495459	4.39576	-4.85487	1.90531e-06	1.28128e-05	3.99831
SFMBT2	-0.495539	5.63246	-9.43566	9.18438e-19	3.28149e-17	31.7678
SH2D2A	-0.495921	4.56291	-5.74266	2.20643e-08	2.28114e-07	8.3077
LOX	-0.496013	7.69887	-4.44785	1.20668e-05	6.70854e-05	2.22973
CNRIP1	-0.496195	5.75794	-8.0378	1.89309e-14	4.67282e-13	21.9771
STAT5A	-0.496387	7.26011	-11.7619	1.07491e-26	6.5759e-25	49.8309
BTN3A3	-0.496509	6.83426	-9.04734	1.58943e-17	5.0811e-16	28.9543
MSRB3	-0.496856	7.57198	-5.52702	6.87005e-08	6.37419e-07	7.20594
THBD	-0.49696	7.08276	-6.09629	3.19266e-09	3.88394e-08	10.1876
MYCT1	-0.497037	5.22758	-7.09819	8.51727e-12	1.54263e-10	15.9787
SHE	-0.497447	4.82264	-8.64386	2.86064e-16	8.32461e-15	26.1047
RHOJ	-0.497456	5.90886	-7.36262	1.60614e-12	3.2136e-11	17.6144
MAN1C1	-0.497801	5.74103	-6.96526	1.93918e-11	3.36871e-10	15.1727
MRAS	-0.498493	6.44355	-8.23104	5.07538e-15	1.31381e-13	23.2724
FABP3	-0.499392	5.89726	-5.49422	8.14183e-08	7.41417e-07	7.04139
BCL6B	-0.499939	5.80877	-7.75637	1.24282e-13	2.78848e-12	20.1271
EPB41L2	-0.499986	7.8548	-8.31434	2.86042e-15	7.57744e-14	23.8368
CD34	-0.500004	6.57812	-7.38878	1.35879e-12	2.74128e-11	17.7785
SIGLEC11	-0.500665	2.86865	-5.66358	3.35931e-08	3.343e-07	7.89967
TUBA1A	-0.500942	9.57002	-6.21319	1.65367e-09	2.10825e-08	10.8286
PDE1B	-0.500976	4.69853	-8.2333	4.99733e-15	1.29755e-13	23.2876
[truncated: 1,064 more rows]
