# Supplementary material for: Machine learning algorithm integrates bulk and single-cell transcriptome sequencing to reveal immune-related personalized therapy prediction features for pancreatic cancer
Source: Aging (Albany NY). 2023 Dec 12;15(23):14109–40. doi: 10.18632/aging.205293 (PMC10756117; doi:10.18632/aging.205293)
Supplement: Supplementary Table 2 [file aging-15-205293-s003.xlsx]

## Sheet: Table S2
Supplementary Table 2. Differential genes between stromal_high and stromal_low samples.
	logFC	AveExpr	t	P.Value	adj.P.Val	B
CA9	1.14567	6.96079	4.64115	5.10323e-06	1.92654e-05	3.20015
HMGCS2	1.12119	4.89499	3.76764	0.000196897	0.00054609	-0.264691
TMEM238	1.11067	5.07671	10.8105	2.34417e-23	1.11361e-21	42.2937
REG4	1.10466	7.48572	2.84369	0.00475294	0.00976601	-3.20634
PHGR1	1.09482	3.95979	4.22249	3.17114e-05	0.000102512	1.45934
TM4SF5	1.09137	5.53105	5.22468	3.19176e-07	1.51796e-06	5.86271
MUC5AC	1.09066	7.32478	3.56225	0.000424935	0.00109531	-0.984539
FOXA2	1.05765	5.9665	8.37843	1.83569e-15	3.24192e-14	24.3827
GOLT1A	1.00856	5.19441	10.0862	6.7268e-21	2.33952e-19	36.709
AMN	1.00187	5.24398	6.38214	6.28864e-10	4.81327e-09	11.9038
SPIRE2	0.998402	5.48235	9.9028	2.73604e-20	8.86319e-19	35.3254
CACNG6	0.98681	2.04368	4.48626	1.01937e-05	3.62384e-05	2.53926
F12	0.974959	4.3915	9.32537	2.07802e-18	5.44544e-17	31.0578
CALHM3	0.96829	3.07617	4.73993	3.25074e-06	1.27591e-05	3.63183
NTSR1	0.965207	3.69538	4.75475	3.03609e-06	1.19636e-05	3.69727
NOXA1	0.954542	6.15325	8.76887	1.17798e-16	2.51366e-15	27.0831
ENTPD8	0.931672	4.4866	6.41335	5.24906e-10	4.07257e-09	12.0798
IHH	0.92908	4.63821	4.3782	1.63359e-05	5.58218e-05	2.08985
SHH	0.925214	4.94378	6.20764	1.70658e-09	1.22051e-08	10.9318
CRACR2B	0.92134	6.51008	7.79786	9.44298e-14	1.33275e-12	20.5135
C11orf86	0.919879	3.05368	4.51867	8.83346e-06	3.17747e-05	2.67592
CKMT1A	0.916649	5.21768	8.525	6.6049e-16	1.24258e-14	25.3875
C11orf53	0.91191	3.49748	6.15375	2.31334e-09	1.61705e-08	10.6359
CKMT1B	0.907489	5.23028	8.24831	4.5079e-15	7.53843e-14	23.4999
OVOL2	0.900065	5.19843	11.1251	1.9004e-24	1.05967e-22	44.7745
ADAP1	0.888463	6.75735	7.57789	4.00785e-13	5.17159e-12	19.0961
TNNT1	0.885299	4.07981	3.74341	0.000215995	0.00059431	-0.351553
CREB3L3	0.881884	2.18826	4.58113	6.68749e-06	2.46821e-05	2.9417
SULT1C2	0.870243	5.94486	4.06709	6.02993e-05	0.000185143	0.850454
BTBD16	0.866196	2.90748	6.90023	2.889e-11	2.80281e-10	14.9093
PRR7	0.863016	3.7809	8.39925	1.58862e-15	2.82612e-14	24.5248
SLC27A2	0.861884	4.46648	7.72051	1.57472e-13	2.15284e-12	20.012
FEZF1	0.86104	1.6914	4.82026	2.2403e-06	9.06948e-06	3.98865
CLDN3	0.850333	6.57768	4.33358	1.97947e-05	6.6505e-05	1.9071
REEP6	0.849445	5.68784	7.99244	2.57133e-14	3.90104e-13	21.7901
MUC3A	0.844579	6.22762	4.41338	1.4025e-05	4.85792e-05	2.2351
DEGS2	0.843994	5.0106	6.21325	1.65318e-09	1.18581e-08	10.9628
AMH	0.843407	2.38041	6.11034	2.95149e-09	2.03058e-08	10.399
TMEM184A	0.841121	6.20925	10.4754	3.28911e-22	1.3479e-20	39.6866
CCNO	0.835613	4.43118	7.74875	1.30708e-13	1.80727e-12	20.1947
CAPN8	0.834967	8.00068	4.68545	4.1726e-06	1.59792e-05	3.39278
CAMSAP3	0.834485	6.07166	10.1518	4.05865e-21	1.43206e-19	37.2073
RNF183	0.8343	3.43971	6.48803	3.39786e-10	2.73551e-09	12.5037
PITX1	0.831324	5.86102	5.24481	2.88744e-07	1.38329e-06	5.95933
CDHR5	0.826241	5.9846	4.948	1.22681e-06	5.21133e-06	4.56672
SLC7A4	0.816926	3.89756	5.94146	7.52247e-09	4.83502e-08	9.48999
METTL27	0.816051	4.06108	6.42756	4.83367e-10	3.77439e-09	12.1601
BARX2	0.812013	5.13651	6.57114	2.08518e-10	1.74865e-09	12.9798
KPNA7	0.810821	3.96018	6.44526	4.3608e-10	3.4383e-09	12.2605
XK	0.810308	4.63918	8.27049	3.87032e-15	6.51996e-14	23.6497
ETV4	0.803452	6.29421	7.77734	1.08189e-13	1.50941e-12	20.3801
LMNTD2	0.800169	4.09511	9.31706	2.20929e-18	5.7628e-17	30.9975
RNF208	0.800158	3.95314	8.56675	4.92696e-16	9.47883e-15	25.6757
SNORC	0.799477	3.59238	9.02769	1.83307e-17	4.23574e-16	28.9139
TRPM5	0.797434	2.74974	5.78859	1.72499e-08	1.03591e-07	8.68468
SMIM22	0.797093	7.6227	8.44383	1.16491e-15	2.09869e-14	24.8297
NPAS1	0.794594	2.397	8.32609	2.63748e-15	4.58647e-14	24.0266
ELMO3	0.789064	7.5126	10.7341	4.29545e-23	1.9744e-21	41.6958
FA2H	0.78714	6.69831	6.00697	5.24484e-09	3.46943e-08	9.84026
CTAGE4	0.786769	2.7559	3.88206	0.000126359	0.000364051	0.152282
PLA2G4F	0.7845	3.27595	6.45275	4.17464e-10	3.30839e-09	12.303
ANXA10	0.782764	8.07906	3.12352	0.00195421	0.00437652	-2.39667
KISS1	0.779584	2.20944	4.59059	6.40957e-06	2.37489e-05	2.98226
ANO7	0.778337	3.63543	6.82147	4.66513e-11	4.36413e-10	14.4412
SAPCD2	0.77766	5.24516	7.77025	1.13389e-13	1.57549e-12	20.3341
EPN3	0.777347	5.398	6.83056	4.41496e-11	4.15755e-10	14.495
RHPN1	0.776673	6.05461	8.11688	1.10732e-14	1.77662e-13	22.6172
GSTO2	0.776211	5.27557	11.936	2.56253e-27	2.26984e-25	51.3036
SPACA4	0.775239	3.31165	6.67236	1.14368e-10	1.00468e-09	13.5657
KRTCAP3	0.774133	7.08924	6.82566	4.54838e-11	4.26429e-10	14.4659
ESPN	0.772868	4.00835	5.07438	6.67983e-07	2.9833e-06	5.15129
PKP3	0.772145	8.33742	7.93175	3.8665e-14	5.733e-13	21.3897
TFF3	0.771935	8.48826	2.98397	0.00306941	0.00657863	-2.80942
CCK	0.769422	2.72569	3.84577	0.000145617	0.000415592	0.0187882
RBBP8NL	0.768987	3.8109	6.76251	6.66158e-11	6.08451e-10	14.0933
GPT2	0.766443	6.30342	6.94209	2.23582e-11	2.21202e-10	15.1598
FOXA3	0.7655	6.8651	5.44082	1.07174e-07	5.57402e-07	6.9162
SLC39A5	0.765332	4.89557	3.16602	0.00169763	0.00385726	-2.26746
CITED1	0.764896	1.95918	5.4185	1.2015e-07	6.19398e-07	6.80575
HOXB9	0.762803	3.94307	4.14483	4.38281e-05	0.000137652	1.15248
AKR7A3	0.760999	6.76327	4.58032	6.71173e-06	2.47499e-05	2.93824
DKK4	0.758606	2.53545	4.40834	1.43361e-05	4.95659e-05	2.2142
LGALS7B	0.758397	2.3924	3.32429	0.000991736	0.00237122	-1.77187
ESRP1	0.757777	8.14248	10.071	7.56166e-21	2.61384e-19	36.5936
ITPKA	0.756781	4.59951	5.24507	2.88368e-07	1.38187e-06	5.96059
CBLC	0.755563	7.33341	7.1967	4.59737e-12	5.02814e-11	16.7066
TRIM7	0.754654	4.50896	6.4776	3.61134e-10	2.89298e-09	12.4443
APOBEC1	0.754033	3.86455	3.52769	0.000481994	0.00123193	-1.102
IGSF9	0.753791	5.23321	5.75846	2.02759e-08	1.2036e-07	8.52797
HR	0.753323	4.76637	7.14129	6.50805e-12	6.96554e-11	16.3665
MCIDAS	0.752751	1.76938	8.38618	1.73963e-15	3.08186e-14	24.4355
HPDL	0.751117	3.73594	6.00531	5.29335e-09	3.49472e-08	9.83132
GDF15	0.750139	6.86173	4.70833	3.75837e-06	1.45105e-05	3.49287
ALKAL1	0.748686	2.85119	4.73996	3.25036e-06	1.27591e-05	3.63194
MLPH	0.747462	8.4311	6.95009	2.12873e-11	2.11839e-10	15.2077
RASSF7	0.747453	8.19811	8.56643	4.9382e-16	9.48972e-15	25.6735
MAPK15	0.747301	4.00352	5.90256	9.30555e-09	5.87234e-08	9.28348
BICDL2	0.747126	6.46431	6.33103	8.44209e-10	6.30266e-09	11.617
TMEM238L	0.746316	3.33997	3.70979	0.000245391	0.00066806	-0.471176
COMTD1	0.745022	6.2111	7.85702	6.37211e-14	9.18394e-13	20.8994
TMEM38A	0.742764	5.3366	8.67332	2.32264e-16	4.71374e-15	26.4153
DBNDD1	0.742297	5.19093	8.27874	3.65648e-15	6.19997e-14	23.7056
NMU	0.7416	5.09712	4.12922	4.67449e-05	0.000146165	1.09144
ZDHHC11	0.741412	3.11292	8.04598	1.79136e-14	2.79245e-13	22.1449
ZIC2	0.739794	1.83432	4.76044	2.95736e-06	1.16843e-05	3.72245
PTK6	0.735781	7.14435	5.61395	4.36359e-08	2.43876e-07	7.78542
NR0B2	0.734833	4.68507	3.77527	0.000191223	0.000531742	-0.237245
RAB17	0.734496	6.2802	9.1314	8.62374e-18	2.0686e-16	29.6563
GRB7	0.734068	7.06539	7.51512	6.02414e-13	7.60598e-12	18.6967
MAGIX	0.733237	4.20907	11.412	1.87184e-25	1.21505e-23	47.0637
ENTPD2	0.732137	5.16763	6.69411	1.00429e-10	8.88193e-10	13.6925
PROC	0.731254	4.07604	6.45946	4.01476e-10	3.18763e-09	12.341
SH2D6	0.729986	2.36577	6.12573	2.7076e-09	1.87416e-08	10.4829
NUP62CL	0.727939	4.5536	9.54999	3.91896e-19	1.11641e-17	32.7014
C9orf152	0.727542	5.78443	4.80052	2.456e-06	9.87217e-06	3.9005
RAB25	0.727119	8.94776	7.41094	1.17893e-12	1.41797e-11	18.0389
C1orf210	0.726638	6.36934	8.83204	7.50206e-17	1.64629e-15	27.527
MACROD1	0.726339	5.90935	9.21114	4.81379e-18	1.20394e-16	30.2304
MUC1	0.726013	9.83223	4.32578	2.04676e-05	6.85123e-05	1.8753
B3GNT3	0.724217	8.50304	6.40875	5.39107e-10	4.17894e-09	12.0538
CFAP46	0.724015	2.60839	6.2244	1.55191e-09	1.11741e-08	11.0243
TMEM52	0.723263	3.26233	3.66448	0.000291015	0.000778559	-0.630854
SYT8	0.723254	6.53718	3.29711	0.00108928	0.00257869	-1.85859
ZFPM1	0.723128	4.83054	7.69179	1.9024e-13	2.57802e-12	19.8266
TNNI3	0.722861	1.8253	4.59735	6.21799e-06	2.31247e-05	3.01126
GLOD5	0.718778	2.39669	7.33482	1.91783e-12	2.23554e-11	17.5624
CDT1	0.71564	4.88496	8.47808	9.17253e-16	1.681e-14	25.0647
MISP3	0.715038	4.9098	7.69696	1.83885e-13	2.49587e-12	19.8599
RNF223	0.714124	2.89223	5.98412	5.94988e-09	3.90392e-08	9.71775
BIK	0.713907	6.64609	6.78277	5.89575e-11	5.43169e-10	14.2125
CHRNA5	0.713547	4.51085	8.51339	7.16496e-16	1.33612e-14	25.3075
ESRP2	0.712646	6.88099	9.35527	1.6662e-18	4.44852e-17	31.2754
PPP1R1B	0.711658	7.4	3.46688	0.000600186	0.00150462	-1.30612
EPCAM	0.709254	10.5397	8.52755	6.48773e-16	1.22597e-14	25.4051
AGR2	0.706716	10.5027	3.62511	0.000337036	0.00088854	-0.768155
CAPN9	0.705568	5.12474	2.92851	0.0036559	0.00771221	-2.9685
SMIM6	0.704868	5.32821	5.83584	1.33703e-08	8.20305e-08	8.93179
PPP1R16A	0.704557	6.53213	8.67477	2.29886e-16	4.67665e-15	26.4254
CYSRT1	0.704449	3.6513	6.1123	2.91925e-09	2.01084e-08	10.4097
RSPH1	0.703204	4.09727	8.10546	1.19673e-14	1.90748e-13	22.541
DQX1	0.703019	3.8456	3.62504	0.000337123	0.000888632	-0.768397
TMEM125	0.70185	6.76302	7.59358	3.61847e-13	4.6905e-12	19.1963
ALDH3A1	0.701214	4.62471	3.84428	0.000146466	0.000417803	0.0133251
BTNL8	0.70121	4.19323	3.33504	0.000955446	0.00229347	-1.73738
RAPGEFL1	0.697828	6.74557	4.96015	1.15778e-06	4.93863e-06	4.62237
PLA2G10	0.697472	4.9876	4.11149	5.02846e-05	0.000156456	1.02232
FABP6	0.697465	3.03888	3.29531	0.00109604	0.00259399	-1.86431
BEST4	0.697461	2.60347	6.99701	1.59484e-11	1.62319e-10	15.49
BSPRY	0.696217	6.56747	8.83628	7.27802e-17	1.59919e-15	27.5569
COL9A1	0.695847	2.72786	4.99141	9.96987e-07	4.29586e-06	4.76608
KDF1	0.694225	6.1213	10.5992	1.24485e-22	5.40083e-21	40.6455
CYP3A5	0.692425	8.27585	4.41901	1.36857e-05	4.74907e-05	2.25844
TMC4	0.692212	8.32587	8.5649	4.99159e-16	9.57069e-15	25.6629
CFAP65	0.690502	1.87411	6.97872	1.78513e-11	1.80069e-10	15.3798
IRX5	0.68818	3.33731	5.43546	1.10158e-07	5.71349e-07	6.88966
CRB3	0.687837	6.63931	8.43823	1.21126e-15	2.17069e-14	24.7914
OVOL1	0.687434	4.89109	5.30537	2.13224e-07	1.04655e-06	6.25184
SGK2	0.685982	5.05612	7.02677	1.32703e-11	1.36533e-10	15.6697
FAM83E	0.685392	6.8843	4.94992	1.21566e-06	5.16997e-06	4.57549
ABHD17C	0.684046	7.69987	6.40206	5.60414e-10	4.33028e-09	12.016
STX1A	0.683649	6.54683	7.7731	1.11268e-13	1.54856e-12	20.3526
OTX1	0.68324	2.41873	7.59059	3.68977e-13	4.77564e-12	19.1771
ECE2	0.683136	3.12691	3.61393	0.000351299	0.000923423	-0.806888
BTNL3	0.682862	2.22438	3.08582	0.00221128	0.00489105	-2.50992
CD164L2	0.68141	1.7993	5.41577	1.21836e-07	6.26759e-07	6.79229
SIM2	0.680426	3.9587	4.86789	1.79236e-06	7.37721e-06	4.20267
IQGAP3	0.680216	6.32823	6.19021	1.88335e-09	1.33849e-08	10.836
PRSS16	0.679785	4.4632	7.92951	3.92521e-14	5.81499e-13	21.3749
TLE6	0.679222	3.32429	7.83105	7.57518e-14	1.07989e-12	20.7297
SRCIN1	0.679218	3.62072	6.66491	1.19561e-10	1.04813e-09	13.5224
SLC25A10	0.678841	5.7802	9.30378	2.43651e-18	6.30711e-17	30.9011
MNX1	0.678404	4.50743	6.35612	7.30711e-10	5.51096e-09	11.7576
FAM71E1	0.677887	3.13055	8.75751	1.27726e-16	2.70514e-15	27.0035
PSAPL1	0.677658	3.14449	3.22757	0.0013808	0.00320024	-2.07739
ASPHD1	0.676401	5.89518	6.55517	2.2912e-10	1.90545e-09	12.8879
CNKSR1	0.676392	6.01364	9.76861	7.5747e-20	2.34224e-18	34.3214
C8G	0.674668	2.71863	4.84954	1.95362e-06	7.99068e-06	4.12
FBP2	0.674246	1.83238	4.52056	8.75996e-06	3.15637e-05	2.6839
INHA	0.674058	3.23477	4.50396	9.42781e-06	3.37342e-05	2.61378
KCNH8	0.673205	4.27583	6.71322	8.95778e-11	8.00972e-10	13.8042
TLCD1	0.673091	5.62096	9.3204	2.15554e-18	5.63121e-17	31.0218
ARMC3	0.667687	2.65662	4.88667	1.64064e-06	6.80876e-06	4.28757
HID1	0.667293	7.53744	7.08584	9.19832e-12	9.6625e-11	16.0281
WNK2	0.66623	5.01151	4.37718	1.6408e-05	5.60117e-05	2.08566
DMKN	0.666049	6.12819	5.97966	6.09803e-09	3.98882e-08	9.69386
TBX6	0.665375	3.94371	6.05645	3.98668e-09	2.68521e-08	10.1068
SLC29A2	0.664653	5.99787	8.65369	2.66878e-16	5.37772e-15	26.2786
CREG2	0.664096	3.65627	5.21668	3.32102e-07	1.5724e-06	5.82444
ZNF488	0.66388	3.48547	5.37595	1.49238e-07	7.55607e-07	6.59631
FIBCD1	0.66076	3.40879	3.23526	0.00134535	0.00312317	-2.05342
BAIAP2L1	0.660504	8.43659	8.05486	1.6868e-14	2.63823e-13	22.2039
ARHGEF16	0.659921	7.10405	7.54925	4.82836e-13	6.17413e-12	18.9135
ANKS4B	0.658867	5.27219	4.86602	1.80821e-06	7.43884e-06	4.19422
GLB1L2	0.658841	5.43428	6.89268	3.02529e-11	2.92835e-10	14.8643
WFDC3	0.658315	3.20345	4.49605	9.76305e-06	3.48531e-05	2.58044
TESC	0.658152	8.54333	4.76239	2.93082e-06	1.15917e-05	3.73109
CEACAM19	0.658064	4.08558	7.60559	3.3459e-13	4.36714e-12	19.273
PRR15	0.657611	6.79233	5.70264	2.73105e-08	1.58414e-07	8.2393
DHRS11	0.656526	4.4983	9.34089	1.85303e-18	4.90115e-17	31.1707
C2orf72	0.654801	5.9396	4.74254	3.21191e-06	1.26213e-05	3.64334
CYP4F11	0.654751	4.83381	4.21944	3.21201e-05	0.000103715	1.44718
LGALS9C	0.654715	2.06959	4.77681	2.74168e-06	1.08994e-05	3.79502
NUDT8	0.654506	4.86134	7.37302	1.50295e-12	1.77505e-11	17.8011
HES6	0.654407	5.05993	5.44945	1.02534e-07	5.36221e-07	6.95897
PAQR6	0.652609	4.16237	7.55076	4.78119e-13	6.12302e-12	18.9232
BCL2L14	0.652087	4.72666	5.8295	1.38364e-08	8.4585e-08	8.89855
MMEL1	0.651983	3.32917	6.75842	6.8276e-11	6.21611e-10	14.0692
ONECUT3	0.651868	3.30864	3.38646	0.000798362	0.00194859	-1.57102
CYP2J2	0.651344	5.09757	6.4004	5.65803e-10	4.36598e-09	12.0067
TTLL6	0.651109	3.07029	5.09916	5.92081e-07	2.67167e-06	5.2674
CNNM1	0.65088	4.33886	6.33654	8.17868e-10	6.11768e-09	11.6478
GPR35	0.650227	6.47264	5.38602	1.41795e-07	7.20283e-07	6.64572
PIP5K1B	0.649859	5.17176	4.77855	2.71967e-06	1.0822e-05	3.80274
GRID2IP	0.649486	3.19881	10.5896	1.34278e-22	5.81085e-21	40.5707
DNAH2	0.648575	4.31833	5.46104	9.6602e-08	5.09114e-07	7.01658
CCDC183	0.648373	3.41355	7.00521	1.51612e-11	1.54677e-10	15.5395
MCRIP2	0.64641	5.81288	8.90038	4.59506e-17	1.02827e-15	28.0094
KREMEN2	0.646068	2.39383	5.48922	8.35484e-08	4.44589e-07	7.15694
UCN	0.645989	2.81499	7.73239	1.45612e-13	2.00034e-12	20.0887
DNASE1L2	0.64589	2.69746	8.2151	5.662e-15	9.35798e-14	23.276
PTPN3	0.644319	6.77307	10.9723	6.46196e-24	3.33026e-22	43.5659
SYTL1	0.643312	6.54647	7.47933	7.59261e-13	9.42537e-12	18.47
FAM83H	0.642467	7.90374	7.61859	3.07355e-13	4.0458e-12	19.3563
HNF1A	0.642068	4.60606	7.46019	8.58971e-13	1.05401e-11	18.3491
FAAH	0.641325	6.46538	9.57516	3.24644e-19	9.40584e-18	32.8869
SMIM31	0.641015	4.30016	4.32411	2.0614e-05	6.89445e-05	1.86852
SEMA4G	0.640888	6.2807	6.17641	2.03608e-09	1.43742e-08	10.7601
ARHGEF35	0.640331	5.87974	6.68508	1.06004e-10	9.34098e-10	13.6398
AP1M2	0.63853	8.48087	8.96957	2.7911e-17	6.37159e-16	28.5001
HAS3	0.638529	4.6962	5.02813	8.35576e-07	3.65876e-06	4.93592
TSTD1	0.637947	7.48193	10.5099	2.50957e-22	1.04609e-20	39.9535
STARD10	0.637714	8.09465	7.9992	2.45688e-14	3.74745e-13	21.8347
TRNP1	0.636982	7.92353	5.64024	3.79983e-08	2.14768e-07	7.91937
ATP2C2	0.636866	5.74826	5.30794	2.10479e-07	1.03487e-06	6.26434
LSR	0.636823	9.6662	7.50116	6.59378e-13	8.2944e-12	18.6082
LRRC56	0.636481	4.34373	8.75148	1.33331e-16	2.81213e-15	26.9612
PTPRH	0.635981	7.63214	6.18709	1.91688e-09	1.36061e-08	10.8188
TPRN	0.635928	6.1685	7.48242	7.44253e-13	9.25257e-12	18.4895
CLDN7	0.635639	8.96988	7.85873	6.29991e-14	9.08758e-13	20.9106
LDHD	0.63528	5.29542	6.96149	1.98471e-11	1.98553e-10	15.2762
GSDMB	0.634115	6.94559	5.63357	3.93564e-08	2.21854e-07	7.88536
USP43	0.633306	4.8849	10.9617	7.03459e-24	3.60353e-22	43.4821
TROAP	0.632984	4.41384	6.25005	1.34138e-09	9.76157e-09	11.1662
MS4A8	0.632678	4.86486	3.41863	0.000712712	0.00175872	-1.46575
RNF186	0.632611	3.8388	3.4219	0.000704515	0.00174077	-1.45501
IRF6	0.632424	8.57252	7.51936	5.86105e-13	7.41107e-12	18.7236
PKMYT1	0.631946	4.04354	6.22996	1.50369e-09	1.08638e-08	11.055
C10orf95	0.631748	3.06761	8.77923	1.09407e-16	2.36127e-15	27.1558
TEX45	0.631673	1.2663	6.48235	3.51253e-10	2.81914e-09	12.4713
OMP	0.630826	1.73011	6.36778	6.83233e-10	5.18276e-09	11.823
NEK2	0.630587	5.37238	6.55193	2.33526e-10	1.93358e-09	12.8693
SYTL5	0.630478	5.02783	3.84474	0.0001462	0.000417116	0.01503
AGPAT2	0.63036	8.80889	7.92843	3.95362e-14	5.85198e-13	21.3678
BAIAP2L2	0.629661	6.52863	4.35768	1.78482e-05	6.04548e-05	2.00558
EFNA2	0.629607	3.85167	3.86257	0.000136383	0.000391337	0.0804303
CLDN9	0.628617	3.84612	4.28613	2.42381e-05	8.00265e-05	1.71456
LPCAT4	0.62833	7.81237	6.36895	6.78618e-10	5.15926e-09	11.8296
RNF39	0.62832	5.07075	5.23894	2.9731e-07	1.42072e-06	5.93114
MISP	0.628118	8.61039	5.49053	8.29848e-08	4.41728e-07	7.16348
MOGAT2	0.62748	2.48134	3.30289	0.00106782	0.00253419	-1.84021
CLCN1	0.626894	2.34838	5.19906	3.62417e-07	1.70643e-06	5.74023
RGL3	0.626833	5.60389	5.85467	1.20739e-08	7.4751e-08	9.03074
HOXA10	0.626441	3.80907	3.31919	0.00100938	0.00240901	-1.78818
INPP5J	0.626178	3.5201	8.31959	2.75873e-15	4.78265e-14	23.9824
PLK1	0.62447	5.43424	6.90226	2.85333e-11	2.77136e-10	14.9214
PIWIL1	0.62384	2.37731	3.40642	0.000744165	0.00182679	-1.50583
CRYBB3	0.622863	1.49324	7.46851	8.14139e-13	1.00407e-11	18.4016
SLC6A8	0.622738	7.27039	5.17268	4.1287e-07	1.91849e-06	5.61462
LMTK3	0.622556	4.58046	6.04516	4.24471e-09	2.83988e-08	10.0458
SLCO4A1	0.622521	6.19124	4.38154	1.61022e-05	5.5167e-05	2.10357
RECQL4	0.622154	5.22309	7.23538	3.60306e-12	4.00243e-11	16.9451
LRRC31	0.621955	3.7424	3.45315	0.000630388	0.00157361	-1.35175
SLC39A4	0.621622	6.3959	4.91918	1.4069e-06	5.91816e-06	4.43515
VSIG1	0.620949	7.07194	3.06503	0.00236602	0.00519816	-2.57182
PHLDA2	0.620121	6.95331	4.40905	1.42917e-05	4.94323e-05	2.21716
BLACAT1	0.61986	5.26812	4.61483	5.74745e-06	2.15017e-05	3.08648
KRTAP5-1	0.619581	2.39476	6.17767	2.02164e-09	1.42842e-08	10.767
SLC22A18	0.619269	6.14438	6.23149	1.49064e-09	1.07832e-08	11.0635
FOXA1	0.619131	4.81694	4.46955	1.09715e-05	3.87363e-05	2.46913
SLC13A2	0.618129	2.05171	3.28512	0.00113506	0.00267628	-1.89662
RAP1GAP	0.617927	7.39414	5.09763	5.96518e-07	2.68884e-06	5.26021
LHFPL3	0.617185	2.55323	4.17809	3.81787e-05	0.000121388	1.28327
FAM241B	0.6168	4.95187	9.118	9.50862e-18	2.26807e-16	29.5601
LRFN4	0.616377	6.30268	6.14542	2.42426e-09	1.68904e-08	10.5904
CDC25C	0.616355	3.74673	6.74578	7.36744e-11	6.69327e-10	13.995
NTF4	0.616118	2.38499	4.36763	1.70988e-05	5.8125e-05	2.0464
SCX	0.615353	3.47015	4.90249	1.52258e-06	6.36542e-06	4.35926
GPT	0.615147	4.22373	4.73428	3.33647e-06	1.30295e-05	3.60689
ANO9	0.613222	6.14701	6.36009	7.1421e-10	5.40328e-09	11.7798
EPS8L2	0.613157	8.27508	8.46736	9.88562e-16	1.80705e-14	24.9911
MST1R	0.613084	7.56295	4.77946	2.70824e-06	1.07892e-05	3.80678
ELF3	0.613082	9.96328	5.23698	3.00232e-07	1.43308e-06	5.92171
FXYD3	0.612807	9.47345	4.71318	3.67572e-06	1.42204e-05	3.51416
CDC42BPG	0.61235	6.30817	9.36587	1.54064e-18	4.13276e-17	31.3526
GPRC5C	0.611906	7.00308	7.5397	5.13692e-13	6.55391e-12	18.8528
MYEOV	0.611453	6.75486	3.1761	0.00164149	0.00374271	-2.23655
COLCA2	0.611291	5.16091	6.57539	2.03359e-10	1.70876e-09	13.0042
GDPD2	0.611217	2.92186	4.37867	1.63032e-05	5.57325e-05	2.09176
EFNA3	0.610453	5.03434	4.64681	4.97412e-06	1.88156e-05	3.22466
CENPV	0.610241	5.85004	7.3679	1.5529e-12	1.82896e-11	17.7691
NQO1	0.609411	9.61264	5.06684	6.9288e-07	3.08271e-06	5.11608
GDPD3	0.608872	5.15503	5.94195	7.50224e-09	4.82479e-08	9.49261
LLGL2	0.608857	8.40004	8.07185	1.50347e-14	2.36754e-13	22.3169
SMIM24	0.608444	7.00071	3.10834	0.00205421	0.00458176	-2.44243
HSF4	0.605988	5.31917	6.62559	1.51072e-10	1.30354e-09	13.2941
TTC22	0.605155	5.6448	8.30587	3.03281e-15	5.22584e-14	23.8893
CRYM	0.604628	2.99219	5.37246	1.51912e-07	7.6755e-07	6.57916
KCNK1	0.604396	7.5424	5.85557	1.2015e-08	7.44228e-08	9.03548
SLC9A3	0.603926	4.89676	3.37559	0.00082941	0.00201915	-1.60639
RHBDL1	0.603403	3.80374	5.55787	5.85163e-08	3.1979e-07	7.50141
GALNT12	0.603009	7.24184	6.64708	1.3296e-10	1.15842e-09	13.4187
PPP1R36	0.602966	4.19155	7.15468	5.98476e-12	6.45012e-11	16.4486
SRMS	0.602953	4.01596	4.02964	7.01986e-05	0.000212583	0.706746
ASCL5	0.60278	2.04404	5.98053	6.06893e-09	3.97284e-08	9.6985
GALE	0.602388	7.57796	6.65235	1.28851e-10	1.12551e-09	13.4493
TESMIN	0.602313	3.48803	8.61694	3.45987e-16	6.83415e-15	26.0233
EPB41L4B	0.602294	6.33244	5.04132	7.84053e-07	3.4554e-06	4.99714
MAL2	0.602181	9.85529	5.97948	6.10411e-09	3.99126e-08	9.69289
GPRC5D	0.601894	3.56603	5.81085	1.53018e-08	9.2909e-08	8.8009
LEMD1	0.601316	4.7899	3.14168	0.00184046	0.00414963	-2.34165
SAMD13	0.601041	3.77622	6.73576	7.82447e-11	7.05945e-10	13.9362
CA14	0.600976	2.7215	6.06321	3.83954e-09	2.59154e-08	10.1433
ARFGEF3	0.600635	7.00243	6.02358	4.78443e-09	3.18095e-08	9.92953
PARD6B	0.600564	6.33055	7.9247	4.05365e-14	5.99482e-13	21.3433
AOC1	0.600508	7.46082	3.44435	0.000650488	0.00161906	-1.38092
C1orf226	0.600348	5.12901	6.57498	2.03847e-10	1.71201e-09	13.0019
FUT9	0.599957	3.13589	3.78127	0.000186871	0.000520662	-0.215632
IL17RE	0.599473	6.09759	6.19772	1.80515e-09	1.2856e-08	10.8772
ARHGEF5	0.599344	6.71622	8.59285	4.10029e-16	7.99697e-15	25.8563
JPH1	0.599027	4.66621	5.87394	1.08748e-08	6.78955e-08	9.13224
NPW	0.59901	1.33458	4.69283	4.03455e-06	1.55134e-05	3.42498
MKRN2OS	0.597992	4.13182	7.49916	6.67972e-13	8.37772e-12	18.5955
KIFC2	0.597864	6.3121	6.70242	9.55586e-11	8.49982e-10	13.7411
PLEKHG6	0.597438	6.01538	6.72446	8.37392e-11	7.52326e-10	13.8699
RCOR2	0.596701	3.795	7.78019	1.06163e-13	1.4848e-12	20.3987
B3GNT7	0.595705	7.26347	5.00429	9.37219e-07	4.05451e-06	4.82552
ADPRHL1	0.593978	3.98333	8.49006	8.4354e-16	1.55093e-14	25.147
MYO1A	0.59371	5.00099	2.92702	0.00367298	0.00774536	-2.97273
NR1I2	0.593179	4.83352	3.22258	0.00140428	0.00325023	-2.09293
C2CD4D	0.593056	2.18983	6.95221	2.10119e-11	2.09466e-10	15.2205
CAPN12	0.592507	4.94716	5.0872	6.27618e-07	2.81633e-06	5.21129
NUF2	0.592315	4.68931	6.24364	1.39124e-09	1.01029e-08	11.1306
INAVA	0.592206	7.925	4.77909	2.71291e-06	1.08027e-05	3.80513
ANKRD18A	0.592157	4.25518	8.36296	2.04359e-15	3.59414e-14	24.2773
TMEM82	0.592008	0.999793	4.84598	1.98641e-06	8.10725e-06	4.10403
STX19	0.590605	4.57603	5.72941	2.36821e-08	1.38931e-07	8.37744
C1orf116	0.590496	8.21063	5.80472	1.58161e-08	9.56218e-08	8.76884
TJP3	0.590225	7.33345	4.71581	3.63172e-06	1.40662e-05	3.52569
CDX2	0.590101	3.7588	3.74473	0.000214907	0.000591699	-0.346817
SSTR1	0.589771	4.19254	3.69572	0.000258788	0.000700717	-0.520973
ANKRD40CL	0.589504	2.87979	4.01467	7.45703e-05	0.000224503	0.649666
PBK	0.589493	4.66791	5.31462	2.0352e-07	1.00502e-06	6.29679
KIF12	0.589482	7.10958	3.80938	0.000167693	0.000472803	-0.113915
OSBPL7	0.589223	6.6491	6.81504	4.85053e-11	4.52016e-10	14.4031
SMPD3	0.588328	5.98637	5.04154	7.83206e-07	3.45256e-06	4.99818
PALM3	0.587354	4.98099	3.92875	0.000105118	0.000307861	0.325665
LRRC66	0.586724	4.84055	4.06552	6.06861e-05	0.00018623	0.844406
COLGALT2	0.586291	4.7383	4.01966	7.30834e-05	0.000220416	0.668694
KCTD14	0.586028	5.06355	4.38648	1.57615e-05	5.40652e-05	2.12393
ICA1	0.585202	7.40895	10.3919	6.3118e-22	2.46204e-20	39.0434
SMKR1	0.584845	2.84811	5.48533	8.52414e-08	4.53031e-07	7.13754
EVPL	0.584444	6.98802	4.55318	7.57713e-06	2.76e-05	2.82239
HSPB9	0.584435	1.92324	7.10316	8.25758e-12	8.71195e-11	16.1336
ACTL10	0.58425	4.13438	8.69705	1.96311e-16	4.04685e-15	26.5807
FAM3B	0.583639	6.53697	2.97335	0.00317457	0.00678435	-2.8401
TMC7	0.583088	5.78702	6.1052	3.0375e-09	2.08218e-08	10.3711
CHKB-CPT1B	0.582403	2.85132	5.60962	4.46384e-08	2.49234e-07	7.76343
CLDND2	0.582138	2.52229	6.88934	3.08756e-11	2.98184e-10	14.8444
DDC	0.581192	4.62255	2.89716	0.00403108	0.00842219	-3.05717
FAM153B	0.579517	1.98799	4.81864	2.25731e-06	9.13616e-06	3.98139
TRIM15	0.579459	5.62336	3.8928	0.000121144	0.000350152	0.191972
TMEM270	0.579451	1.20273	5.30088	2.18087e-07	1.06857e-06	6.23008
TRIM31	0.578659	6.28204	3.01114	0.00281475	0.00609115	-2.73046
ERBB3	0.578211	9.04118	5.69239	2.88383e-08	1.66481e-07	8.18656
IL22RA1	0.577935	6.58533	3.47563	0.000581661	0.00146228	-1.27696
PRR36	0.577775	3.10366	5.10353	5.79613e-07	2.62167e-06	5.28789
VIPR1	0.577525	4.41005	5.23129	3.08846e-07	1.47048e-06	5.89443
CGB7	0.577049	1.77046	4.25905	2.71849e-05	8.9013e-05	1.60556
PLEKHH1	0.576875	5.80964	8.22825	5.17379e-15	8.61809e-14	23.3646
HNF4A	0.576715	7.00232	4.51564	8.95292e-06	3.21636e-05	2.6631
PCSK4	0.576182	3.43953	6.52729	2.69941e-10	2.20716e-09	12.728
LAD1	0.575638	9.70573	5.03228	8.19014e-07	3.59224e-06	4.95517
NSUN7	0.574813	4.93894	8.29812	3.19941e-15	5.47511e-14	23.8368
NRTN	0.574605	3.24412	5.84649	1.26209e-08	7.77129e-08	8.98775
PERM1	0.57457	3.30891	5.41376	1.23093e-07	6.32268e-07	6.78237
ALOX12B	0.574529	1.33223	5.64699	3.66696e-08	2.0788e-07	7.95384
C19orf33	0.572877	9.32861	3.32519	0.000988634	0.0023648	-1.76897
ADAT3	0.572694	3.73468	6.12923	2.65496e-09	1.84147e-08	10.502
TEDC2	0.572668	3.40484	7.0374	1.24252e-11	1.28303e-10	15.7341
CHMP4C	0.571591	7.08925	7.30803	2.27433e-12	2.61701e-11	17.3955
ZG16B	0.571141	6.40876	3.29868	0.00108338	0.00256723	-1.85357
CGN	0.570282	8.39482	5.93027	7.99799e-09	5.11552e-08	9.43048
PDZD3	0.570079	4.00285	3.29641	0.00109187	0.00258448	-1.86079
TNNT2	0.569799	2.48241	4.68179	4.24295e-06	1.62266e-05	3.37678
PAK4	0.569049	6.85024	8.36044	2.07956e-15	3.65363e-14	24.2601
PRRG2	0.568913	5.8702	8.64102	2.91897e-16	5.84034e-15	26.1905
NR2F6	0.568666	7.67629	9.51933	4.92705e-19	1.38047e-17	32.4758
SH2D3A	0.568644	6.49652	5.53724	6.51479e-08	3.53758e-07	7.39754
IMPA2	0.56809	7.00029	5.28037	2.41733e-07	1.17361e-06	6.13075
SLC23A3	0.567686	3.48314	7.7135	1.64911e-13	2.24912e-12	19.9667
DNAJB13	0.567233	2.83713	3.4411	0.00065807	0.00163503	-1.39168
ZDHHC23	0.566037	5.40374	10.9369	8.57412e-24	4.35284e-22	43.2867
ZDHHC11B	0.565706	4.02969	5.40139	1.31113e-07	6.70629e-07	6.72138
ACY3	0.565528	5.20203	5.09673	5.99144e-07	2.69996e-06	5.25598
ZNF385C	0.564485	2.87036	9.04014	1.67484e-17	3.89125e-16	29.0028
ZNF165	0.564396	4.85845	7.1806	5.08697e-12	5.53514e-11	16.6076
BDH1	0.564107	5.1827	7.47721	7.69675e-13	9.53377e-12	18.4566
CDCA3	0.563518	4.275	6.46148	3.96771e-10	3.15469e-09	12.3525
AGR3	0.563355	7.15717	2.86239	0.00448811	0.00927565	-3.15447
PRSS33	0.563274	2.36648	2.96116	0.00329932	0.00702645	-2.87519
GAL3ST1	0.563066	4.50022	4.96679	1.12167e-06	4.79184e-06	4.65282
UBE2T	0.563063	5.92829	6.57936	1.98649e-10	1.67332e-09	13.027
CRISP2	0.562772	2.42931	2.93834	0.00354504	0.00749524	-2.94052
S100A5	0.562699	2.16966	5.44832	1.03127e-07	5.38994e-07	6.95339
MARVELD2	0.562652	6.3119	8.36901	1.95968e-15	3.45013e-14	24.3185
PNCK	0.562233	2.1954	3.21002	0.00146507	0.00337699	-2.13195
MRPS24	0.561667	5.83987	6.42196	4.9933e-10	3.8901e-09	12.1285
RORC	0.561018	6.00557	5.13526	4.96287e-07	2.2683e-06	5.43734
TMEM171	0.560235	4.77128	4.7079	3.76577e-06	1.45357e-05	3.49098
CFAP73	0.560086	2.70571	4.48143	1.04131e-05	3.69181e-05	2.51895
C2orf15	0.559888	4.35462	10.0038	1.26595e-20	4.24696e-19	36.0854
TRIM54	0.559469	4.32895	3.25372	0.00126358	0.00294823	-1.99561
DUSP9	0.558858	1.13082	4.15503	4.20147e-05	0.000132348	1.19252
MARVELD3	0.558671	5.93305	8.96938	2.79494e-17	6.37179e-16	28.4987
CDS1	0.558598	7.08262	7.59146	3.66879e-13	4.7521e-12	19.1827
CLDN4	0.558583	10.0083	4.78441	2.64687e-06	1.05645e-05	3.82875
ANK1	0.55787	4.05319	5.02177	8.61613e-07	3.75922e-06	4.9064
UBE2C	0.556969	6.67654	4.46211	1.1336e-05	3.9932e-05	2.43797
ALOXE3	0.556249	1.43419	5.00372	9.39775e-07	4.06272e-06	4.8229
TACC2	0.555267	6.24819	8.05478	1.68777e-14	2.63823e-13	22.2034
KLHDC7A	0.555186	4.3731	4.33417	1.97452e-05	6.63518e-05	1.90948
CYP2C9	0.554629	4.48771	3.01051	0.0028204	0.00610261	-2.73229
PRR4	0.554105	2.47525	4.55648	7.46643e-06	2.7261e-05	2.83645
ERN2	0.553722	7.38818	3.05479	0.00244584	0.00535967	-2.60216
THEM6	0.55368	7.36283	7.4737	7.87303e-13	9.74502e-12	18.4344
EXOC3L4	0.553663	4.57225	4.80781	2.37416e-06	9.57262e-06	3.933
FOXH1	0.553471	2.31161	6.37614	6.51049e-10	4.9652e-09	11.87
HDHD3	0.552932	7.68889	7.65027	2.4982e-13	3.3323e-12	19.5594
BEGAIN	0.551995	2.91663	5.61697	4.29489e-08	2.40511e-07	7.80078
SPATA6L	0.551902	4.70907	7.99279	2.56534e-14	3.89986e-13	21.7923
RXFP4	0.551731	2.09135	4.87777	1.71091e-06	7.06937e-06	4.2473
EPS8L3	0.551043	7.58182	3.14555	0.00181706	0.00410232	-2.3299
FAM110C	0.550726	6.48285	7.26161	3.05269e-12	3.43532e-11	17.1073
DACT2	0.550568	4.08839	3.65659	0.000299742	0.00079939	-0.658498
PRR22	0.549474	2.97535	6.36875	6.7942e-10	5.16304e-09	11.8285
ZP3	0.548791	4.15064	5.52944	6.78413e-08	3.67211e-07	7.35835
ANKRD24	0.548185	3.05103	7.24336	3.42605e-12	3.82328e-11	16.9944
FOXL1	0.548101	6.3065	3.87861	0.000128084	0.000368771	0.139516
FAAH2	0.547047	6.2345	8.75505	1.29987e-16	2.74961e-15	26.9862
E2F1	0.546166	5.28744	5.94301	7.45882e-09	4.79955e-08	9.49824
FBXL8	0.545577	4.69213	6.99981	1.56755e-11	1.59733e-10	15.5069
TMPRSS2	0.544752	7.64821	4.04974	6.47081e-05	0.000197291	0.783724
MSH5-SAPCD1	0.544722	3.44424	8.21372	5.7159e-15	9.43789e-14	23.2667
TLX1	0.544392	1.19031	4.73815	3.27754e-06	1.28466e-05	3.62396
PRR15L	0.544307	8.70951	4.38149	1.61054e-05	5.5167e-05	2.10338
RIN1	0.543776	5.71171	7.45455	8.90727e-13	1.08748e-11	18.3135
ACP6	0.543341	5.6771	8.70071	1.91276e-16	3.94786e-15	26.6062
PLEKHA6	0.543316	7.84434	6.76975	6.37735e-11	5.84058e-10	14.1359
RIPK4	0.542124	6.96937	6.84558	4.03044e-11	3.81233e-10	14.584
FAM221A	0.541623	4.6088	8.44646	1.14377e-15	2.06717e-14	24.8477
MXD3	0.541601	4.58885	7.62876	2.876e-13	3.80343e-12	19.4214
STYK1	0.54153	5.61621	5.06807	6.88783e-07	3.06894e-06	5.12179
CDCA7	0.541529	6.05476	3.77772	0.000189434	0.000527371	-0.228421
DNAAF3	0.541077	3.0437	6.57629	2.02282e-10	1.70055e-09	13.0094
PPDPF	0.540544	9.69076	7.48864	7.14945e-13	8.93393e-12	18.5289
ABHD11	0.539935	7.50166	8.32906	2.58392e-15	4.50715e-14	24.0467
SEMA4B	0.539727	8.3609	5.98229	6.01044e-09	3.93872e-08	9.70791
CATSPERB	0.539556	4.70385	5.02057	8.66613e-07	3.7762e-06	4.90084
CEP72	0.53923	4.70111	8.10906	1.16777e-14	1.86481e-13	22.565
CELSR3	0.538446	4.96117	5.04028	7.8798e-07	3.47001e-06	4.99233
CYP2S1	0.538133	7.06062	3.03726	0.00258831	0.00563917	-2.6539
CNFN	0.538064	2.80034	4.75884	2.97938e-06	1.17565e-05	3.71534
CCDC24	0.537667	5.59484	7.5239	5.69136e-13	7.20722e-12	18.7524
PWWP2B	0.537083	6.77453	7.66693	2.23979e-13	2.99938e-12	19.6665
GINS2	0.536973	4.66754	6.59424	1.81917e-10	1.54693e-09	13.1129
USH1C	0.536815	7.63819	4.34704	1.86841e-05	6.30478e-05	1.96203
PRSS12	0.535912	5.99861	5.28159	2.40258e-07	1.16778e-06	6.13666
MROH6	0.535392	6.23157	4.05658	6.29347e-05	0.000192471	0.81
DEPDC1B	0.535386	4.43721	5.44695	1.03857e-07	5.42142e-07	6.94658
CXADR	0.535031	7.31698	6.57812	2.00106e-10	1.68475e-09	13.0199
EBP	0.534775	7.60032	8.70378	1.87154e-16	3.87218e-15	26.6277
SAMD10	0.534746	5.10822	7.34827	1.76031e-12	2.0604e-11	17.6463
OR2B6	0.534689	1.18755	4.65407	4.81293e-06	1.82546e-05	3.25617
RASSF10	0.534645	3.00248	3.10162	0.00209998	0.00466854	-2.46262
GRIN1	0.534571	1.31681	4.98271	1.03944e-06	4.46861e-06	4.72599
FAM189A2	0.534187	3.8508	5.62738	4.06607e-08	2.28525e-07	7.85379
BCAN	0.533836	2.70908	5.5382	6.48239e-08	3.52224e-07	7.40237
C3orf52	0.533136	6.04038	6.40826	5.40621e-10	4.18876e-09	12.0511
CENPA	0.532737	4.02077	5.35238	1.68191e-07	8.44533e-07	6.48085
PDF	0.532396	4.11294	8.02753	2.02926e-14	3.1204e-13	22.0225
ZNF774	0.532378	3.8438	9.33035	2.003e-18	5.26197e-17	31.0941
C4BPB	0.532275	5.07244	3.62987	0.000331124	0.000874173	-0.751613
PPM1N	0.532153	3.54928	5.96399	6.64725e-09	4.31817e-08	9.6101
GLTPD2	0.532122	2.37766	5.33637	1.82378e-07	9.07992e-07	6.40267
ARRDC1	0.53209	7.60968	7.65208	2.46883e-13	3.29571e-12	19.571
CYSTM1	0.531072	9.55295	5.27808	2.44515e-07	1.18576e-06	6.11971
SH2D4A	0.530929	7.1806	5.77985	1.80794e-08	1.0819e-07	8.63914
DHDH	0.530813	3.03004	4.31418	2.15076e-05	7.16654e-05	1.82817
LTK	0.530804	3.44111	4.1269	4.71939e-05	0.00014746	1.08239
CCDC120	0.530576	5.65768	10.028	1.05121e-20	3.58276e-19	36.2687
STAP2	0.530508	7.22094	6.35671	7.2824e-10	5.49476e-09	11.7609
PLEK2	0.530476	7.93943	3.92249	0.000107753	0.000314927	0.30233
TSPAN1	0.530282	9.99629	3.91747	0.000109918	0.000320701	0.283589
FGFR4	0.529783	6.58656	3.90891	0.000113696	0.000330816	0.251746
KLHL23	0.528808	5.91675	6.43584	4.60636e-10	3.6185e-09	12.2071
PNMT	0.528622	2.05835	3.44512	0.000648713	0.00161556	-1.37838
SPINT2	0.528164	10.545	7.04975	1.15093e-11	1.19499e-10	15.8089
KRT8	0.527607	12.096	5.69356	2.86593e-08	1.65616e-07	8.19259
PHACTR3	0.527603	4.30392	2.97311	0.00317692	0.00678852	-2.84077
GATA5	0.527561	1.33595	2.85473	0.00459488	0.0094664	-3.17575
CDCA8	0.527027	5.55254	5.75783	2.0345e-08	1.20644e-07	8.52467
SPC24	0.526025	4.96658	6.18068	1.98752e-09	1.40665e-08	10.7836
C11orf91	0.525985	2.27301	5.4788	8.81615e-08	4.6782e-07	7.10497
SLC17A9	0.525788	6.18481	4.57085	7.00236e-06	2.56437e-05	2.89774
TTC39A	0.525447	6.16559	6.54291	2.46256e-10	2.02714e-09	12.8175
DCST2	0.525407	2.54283	6.94653	2.17577e-11	2.16015e-10	15.1864
FOXD2	0.525299	3.23362	6.19856	1.7966e-09	1.28058e-08	10.8818
FHDC1	0.524899	5.63269	6.68891	1.03603e-10	9.14364e-10	13.6622
TPD52	0.524492	7.88654	6.63936	1.39201e-10	1.2097e-09	13.374
MFSD3	0.524183	6.09159	7.17076	5.41093e-12	5.86138e-11	16.5472
SOX9	0.523525	8.26874	5.92121	8.40444e-09	5.35535e-08	9.38235
CCNI2	0.523482	3.90551	6.78978	5.65126e-11	5.22059e-10	14.2539
TMEM45B	0.523347	7.23062	3.71271	0.0002427	0.000661368	-0.460842
CTAGE15	0.523344	2.63828	3.45304	0.000630645	0.00157402	-1.35213
LIME1	0.52266	5.00987	6.62014	1.56036e-10	1.34297e-09	13.2626
REPS2	0.522637	6.63069	6.53328	2.60614e-10	2.135e-09	12.7623
ENDOG	0.522603	5.01489	6.7832	5.88047e-11	5.42055e-10	14.2151
GRAMD2A	0.522552	3.64937	5.4511	1.01669e-07	5.32679e-07	6.96716
GATA4	0.52239	5.11027	3.1755	0.0016448	0.00374874	-2.2384
C9orf24	0.522335	2.0162	3.86201	0.000136681	0.000392127	0.0783739
TSSK6	0.522291	3.07331	8.56302	5.05794e-16	9.68698e-15	25.6499
EFNA1	0.521886	8.65306	5.39779	1.33545e-07	6.8163e-07	6.70363
KMT5C	0.521763	5.04675	8.00005	2.44287e-14	3.73278e-13	21.8404
MUC20	0.521535	7.2551	3.79337	0.000178374	0.000499202	-0.171926
PTPN20	0.521435	3.7973	4.83718	2.06996e-06	8.42709e-06	4.0645
RNF32	0.521178	3.91674	9.4311	9.50138e-19	2.58952e-17	31.8288
MYRFL	0.521022	2.60461	4.16272	4.06968e-05	0.000128553	1.22272
SEZ6L2	0.520993	7.74758	6.48846	3.38923e-10	2.73049e-09	12.5061
ACY1	0.520557	5.56648	6.70388	9.47271e-11	8.43026e-10	13.7496
KRT18	0.520535	11.5091	5.63731	3.85895e-08	2.17603e-07	7.90442
ANG	0.520348	6.87327	5.18085	3.96555e-07	1.85281e-06	5.65347
TONSL	0.520316	5.2623	6.95124	2.11376e-11	2.10595e-10	15.2146
CDC25A	0.519925	3.95698	6.55051	2.35486e-10	1.94792e-09	12.8611
KLHDC9	0.519469	4.51769	7.06732	1.03207e-11	1.07883e-10	15.9155
ATG9B	0.519292	3.86764	4.06726	6.0258e-05	0.000185084	0.851102
CRIP1	0.519254	6.34432	5.30971	2.08619e-07	1.02751e-06	6.27291
SH2D7	0.519093	1.99248	3.90554	0.000115216	0.000334667	0.23923
CDC20	0.519069	6.19169	4.42295	1.34532e-05	4.67699e-05	2.27476
PPP1R1C	0.518795	3.31189	5.85033	1.23613e-08	7.6391e-08	9.00792
ATP6V1FNB	0.518734	4.29799	4.49337	9.87916e-06	3.52306e-05	2.56916
MAP7	0.518571	7.05075	8.04564	1.79542e-14	2.79621e-13	22.1427
MOK	0.518244	5.12113	9.21086	4.82355e-18	1.20461e-16	30.2284
MICALL2	0.517634	7.09242	5.93753	7.68617e-09	4.92349e-08	9.46909
C2CD4B	0.517466	5.08319	3.25595	0.00125406	0.00293126	-1.98864
SOWAHB	0.517457	5.30681	6.37836	6.42749e-10	4.9085e-09	11.8825
ADAMTSL5	0.517321	4.02944	5.15742	4.45109e-07	2.05594e-06	5.54218
PDX1	0.517244	4.85424	3.64283	0.000315532	0.000836841	-0.706519
TRIB3	0.517135	6.1444	5.20415	3.53403e-07	1.66537e-06	5.76451
CCDC114	0.5171	2.58358	4.27871	2.50136e-05	8.23153e-05	1.68464
TEDC1	0.516888	4.6516	6.86784	3.52e-11	3.35752e-10	14.7163
CEP170B	0.516328	7.86149	8.30525	3.04585e-15	5.23768e-14	23.8851
TNK1	0.516177	5.45239	9.36321	1.5713e-18	4.20836e-17	31.3332
TUFT1	0.515866	7.48068	6.85038	3.91453e-11	3.70475e-10	14.6125
C6orf132	0.515696	6.52976	5.13889	4.8753e-07	2.23128e-06	5.45449
DOC2A	0.515687	2.46066	6.49312	3.29817e-10	2.66217e-09	12.5327
IRX3	0.515326	3.78593	3.06629	0.00235638	0.005181	-2.56809
RALGPS1	0.515064	5.73419	7.27557	2.7944e-12	3.16829e-11	17.1939
RPS6KL1	0.514472	4.50231	7.59714	3.53549e-13	4.58993e-12	19.219
C17orf113	0.514438	3.60847	8.13308	9.91673e-15	1.60013e-13	22.7255
CENPF	0.514004	6.64879	5.4512	1.01617e-07	5.32572e-07	6.96766
SMIM5	0.513992	4.7218	5.32158	1.96515e-07	9.73815e-07	6.3306
ASL	0.513939	7.69928	8.56245	5.07826e-16	9.71495e-15	25.646
LRRC26	0.513918	0.919037	3.80473	0.00017073	0.000480252	-0.130781
TTLL10	0.513508	1.46425	5.92729	8.12945e-09	5.18985e-08	9.41465
BCL2L10	0.5134	2.08101	4.64534	5.00725e-06	1.89283e-05	3.21831
ZC2HC1C	0.513277	4.26061	9.80388	5.79986e-20	1.81654e-18	34.5846
STPG3	0.513167	1.26613	6.53356	2.60176e-10	2.13244e-09	12.7639
MOGAT3	0.512493	2.27854	3.10746	0.00206017	0.00459204	-2.44508
PLEKHN1	0.512392	4.6463	4.34101	1.91735e-05	6.45329e-05	1.93743
NEBL	0.512329	6.62934	5.89232	9.8398e-09	6.18881e-08	9.2293
FAM174B	0.51227	6.54303	5.94191	7.50372e-09	4.82479e-08	9.49241
MYZAP	0.511868	5.40605	5.09549	6.02785e-07	2.71349e-06	5.25015
CEACAM1	0.510158	7.39329	4.60352	6.04781e-06	2.2551e-05	3.03778
VWA3B	0.510059	2.37657	5.37078	1.5321e-07	7.73646e-07	6.57094
RDH13	0.509733	5.81914	7.64233	2.63159e-13	3.50199e-12	19.5084
PLLP	0.509408	6.33778	4.80762	2.37624e-06	9.57876e-06	3.93216
TST	0.509407	8.07884	5.32259	1.95513e-07	9.69979e-07	6.33554
FOXM1	0.509395	5.67085	4.89876	1.54966e-06	6.46909e-06	4.34234
LDLRAD1	0.50917	2.30754	3.76929	0.000195655	0.000543177	-0.258752
MIA-RAB4B	0.508552	1.63918	3.00658	0.00285602	0.00617341	-2.74374
PAX9	0.508305	2.23902	2.98791	0.00303124	0.00650584	-2.79802
C4orf48	0.508298	5.45281	3.20278	0.00150117	0.00345099	-2.15436
TDRD5	0.50769	3.21796	3.61089	0.000355281	0.000933313	-0.817418
WFDC2	0.507649	8.30257	2.99411	0.00297202	0.00639406	-2.78004
DMBX1	0.507165	2.48944	3.56378	0.00042256	0.00109018	-0.97931
DHRS13	0.507002	4.53121	8.59354	4.08031e-16	7.9763e-15	25.8611
CHTF18	0.506627	5.05515	6.97964	1.77507e-11	1.79161e-10	15.3853
GOLGA7B	0.506286	5.2171	5.65238	3.56411e-08	2.02454e-07	7.98139
PPP1R35	0.506218	6.75014	7.85524	6.44842e-14	9.27036e-13	20.8877
RTN4R	0.50609	4.29299	5.29004	2.3029e-07	1.12254e-06	6.17754
LGALS9B	0.506033	1.75961	3.42873	0.000687652	0.00170306	-1.43252
TNNI1	0.505828	4.4135	7.3889	1.35777e-12	1.61819e-11	17.9006
FNDC11	0.505292	2.33488	5.14552	4.71908e-07	2.1672e-06	5.48586
WFIKKN1	0.50507	1.79025	5.76405	1.96783e-08	1.17181e-07	8.55697
SLC4A11	0.505043	5.30544	3.86908	0.000132951	0.00038207	0.104415
LCN12	0.504773	1.86297	4.6717	4.4425e-06	1.69213e-05	3.3328
ADCK5	0.504617	5.6129	6.96917	1.89325e-11	1.90074e-10	15.3223
ZNF579	0.504604	5.29314	7.4825	7.43879e-13	9.25257e-12	18.49
ZNHIT2	0.504489	5.77397	6.7129	8.97463e-11	8.02057e-10	13.8023
KCNK7	0.504328	2.37874	6.26995	1.19759e-09	8.75049e-09	11.2765
GPR20	0.503683	2.69238	4.20724	3.38041e-05	0.000108596	1.3987
AGFG2	0.503449	7.0787	7.17459	5.28233e-12	5.73303e-11	16.5707
F5	0.503154	6.94244	3.13966	0.00185284	0.00417423	-2.3478
HJURP	0.502953	5.35343	5.24688	2.85785e-07	1.37143e-06	5.96927
POC1A	0.50268	4.98262	6.38575	6.1587e-10	4.72445e-09	11.9241
UBE2S	0.502563	6.17935	6.33931	8.04977e-10	6.03094e-09	11.6633
SHANK2	0.502543	5.18194	7.4114	1.17546e-12	1.4148e-11	18.0418
GUCA2A	0.502507	1.49708	3.06826	0.00234137	0.00515132	-2.56224
ARHGEF38	0.502368	5.57288	4.66463	4.58768e-06	1.7443e-05	3.30203
GRTP1	0.502105	5.99452	5.71324	2.58126e-08	1.50547e-07	8.29396
ILDR1	0.501692	5.88992	6.38692	6.11711e-10	4.69466e-09	11.9307
SPR	0.501547	7.77648	8.67353	2.31909e-16	4.71215e-15	26.4168
ALG1L	0.501528	4.11305	3.79059	0.000180291	0.000504311	-0.181969
FKBP1B	0.501491	5.48115	6.72306	8.44462e-11	7.57078e-10	13.8617
ESPL1	0.50145	4.30696	6.19911	1.79094e-09	1.27709e-08	10.8849
KIAA1522	0.50087	8.45278	6.44643	4.33112e-10	3.41648e-09	12.2671
TFR2	0.500477	2.7633	4.82267	2.21523e-06	8.97651e-06	3.99944
EVX1	0.500471	1.27397	3.30068	0.00107597	0.0025518	-1.84723
RDM1	0.500335	2.27731	6.44889	4.26953e-10	3.37416e-09	12.2811
PCP2	0.499997	2.59743	5.7542	2.07437e-08	1.22923e-07	8.50586
NECAB3	0.49908	5.58455	8.57949	4.50458e-16	8.70561e-15	25.7638
SDR16C5	0.498625	6.78362	3.11718	0.0019954	0.00446231	-2.4158
SPINK5	0.498585	4.40327	3.25789	0.00124579	0.00291432	-1.98253
ACYP1	0.49834	5.1974	10.2571	1.79902e-21	6.63688e-20	38.0099
ELL3	0.498286	4.01828	7.30693	2.29024e-12	2.63354e-11	17.3887
HTR1D	0.49824	4.05784	3.66253	0.000293154	0.000783417	-0.637704
SMAGP	0.498052	6.64808	5.90353	9.25636e-09	5.84347e-08	9.28863
ACOT11	0.497547	5.26817	7.81944	8.18299e-14	1.16264e-12	20.654
TBC1D30	0.497536	5.19689	7.59457	3.59521e-13	4.6639e-12	19.2026
MAP3K21	0.496935	5.96877	6.50627	3.05378e-10	2.48022e-09	12.6077
CAPS	0.496682	6.73068	4.95108	1.20897e-06	5.1428e-06	4.5808
SDCBP2	0.496399	8.16217	4.0912	5.46477e-05	0.000169196	0.94356
HMGA1	0.49616	9.57693	4.81466	2.29954e-06	9.30041e-06	3.96362
DOK7	0.496156	4.2582	4.87899	1.70111e-06	7.03571e-06	4.25282
SYCE3	0.495956	1.61801	4.25678	2.7447e-05	8.97502e-05	1.59645
CYP2B6	0.495715	2.52009	3.69034	0.000264082	0.000713915	-0.539939
ASF1B	0.495642	5.57269	5.53393	6.6279e-08	3.59441e-07	7.38089
MKI67	0.495634	7.07837	4.85678	1.88836e-06	7.74238e-06	4.1526
ASPM	0.495527	5.70528	5.54155	6.37052e-08	3.46477e-07	7.41921
WFDC10B	0.495402	1.74435	3.90701	0.000114548	0.000332955	0.244708
CDC45	0.495193	4.62695	4.92439	1.37251e-06	5.78232e-06	4.45892
WNK4	0.494911	2.92727	3.97526	8.73544e-05	0.000259954	0.500265
KCNE2	0.494888	1.66313	4.30822	2.20619e-05	7.33092e-05	1.80398
NGEF	0.494876	5.84562	4.81114	2.33759e-06	9.44758e-06	3.94788
KCNK10	0.494332	2.78286	4.04862	6.50033e-05	0.000198085	0.779423
ACER2	0.49417	5.05977	4.70133	3.88064e-06	1.49554e-05	3.46222
HSD11B2	0.494107	6.15834	3.32128	0.0010021	0.00239365	-1.78149
PRKCZ	0.494029	5.61253	8.49836	7.95995e-16	1.4651e-14	25.2041
HOOK2	0.493787	6.64848	8.21566	5.64023e-15	9.34016e-14	23.2798
CYP2W1	0.493507	3.28517	3.53623	0.000467259	0.00119643	-1.07307
CCDC187	0.493125	2.74381	4.91215	1.45452e-06	6.10036e-06	4.40318
NEDD4L	0.493049	6.32458	8.27394	3.77945e-15	6.39574e-14	23.6731
HSD17B3	0.492761	2.42743	5.30655	2.11955e-07	1.04122e-06	6.2576
ALS2CL	0.492079	7.38379	4.7145	3.65368e-06	1.41448e-05	3.51992
SERINC2	0.492022	8.7076	4.25766	2.73446e-05	8.94497e-05	1.6
NPM2	0.491629	3.87841	4.62473	5.49652e-06	2.06402e-05	3.12916
IZUMO4	0.491524	3.42784	6.20268	1.75511e-09	1.25311e-08	10.9046
SLC9A2	0.490823	4.69327	3.11665	0.00199888	0.00446774	-2.4174
MYH14	0.490199	8.89597	4.84061	2.03701e-06	8.30579e-06	4.0799
C1orf53	0.489999	3.83715	5.83186	1.3661e-08	8.36632e-08	8.91092
HELLS	0.489982	5.15092	7.89446	4.96316e-14	7.26406e-13	21.1446
CLCN2	0.489736	5.12462	8.54391	5.7844e-16	1.10286e-14	25.5179
FMO5	0.489519	6.1103	3.77397	0.00019218	0.00053414	-0.241931
AJM1	0.489191	3.65321	5.82166	1.44351e-08	8.79606e-08	8.85745
DECR2	0.489059	5.92338	6.8857	3.15701e-11	3.04027e-10	14.8226
CYP3A4	0.488948	2.45483	3.15213	0.00177786	0.00402236	-2.30988
TERT	0.488677	1.15024	4.34967	1.84739e-05	6.2377e-05	1.97279
PABPC1L	0.488196	6.11434	5.70071	2.75915e-08	1.5988e-07	8.22938
SFTPD	0.487984	3.25894	4.68016	4.27465e-06	1.63368e-05	3.36966
FAM83F	0.487625	4.68216	6.05871	3.93683e-09	2.65479e-08	10.119
RIBC2	0.487278	3.03246	4.71986	3.56493e-06	1.38264e-05	3.54346
C19orf73	0.487037	2.73188	6.17908	2.00563e-09	1.41828e-08	10.7748
ZNF593	0.486974	5.06232	7.38848	1.36144e-12	1.62143e-11	17.898
CDK1	0.486912	6.16281	5.06682	6.92963e-07	3.08271e-06	5.11596
PTTG1	0.486326	6.04452	5.02463	8.49816e-07	3.71442e-06	4.91966
LEXM	0.486174	1.98665	6.63872	1.39737e-10	1.21374e-09	13.3702
MMP15	0.486079	7.68422	6.49573	3.24816e-10	2.6243e-09	12.5476
ABO	0.48532	4.70116	3.3254	0.000987923	0.00236376	-1.76831
VSTM5	0.485289	2.50457	5.03476	8.09285e-07	3.55279e-06	4.96667
SPINT1	0.484269	9.42997	6.52812	2.68638e-10	2.19862e-09	12.7327
PLEKHB1	0.484053	6.31645	4.5422	7.95696e-06	2.88845e-05	2.77568
FAM229A	0.483835	2.65799	5.85555	1.20165e-08	7.44228e-08	9.03536
SLC16A5	0.483364	6.40093	4.32697	2.03631e-05	6.82529e-05	1.88017
MTFP1	0.483167	5.38513	6.69854	9.78076e-11	8.67717e-10	13.7184
B4GALNT3	0.482359	7.14288	4.93046	1.33354e-06	5.63046e-06	4.48658
LFNG	0.482281	8.00495	5.00425	9.37399e-07	4.05451e-06	4.82534
SORD	0.481845	6.47403	7.17585	5.24095e-12	5.69175e-11	16.5784
GMDS	0.481696	7.27733	4.59981	6.14944e-06	2.28848e-05	3.02185
EPHA10	0.481624	5.43426	6.60538	1.70309e-10	1.45623e-09	13.1772
PRELID2	0.481012	5.58825	7.41078	1.18018e-12	1.41846e-11	18.0379
ARHGEF39	0.480968	4.55625	6.39414	5.86705e-10	4.51497e-09	11.9714
CATSPER2	0.480787	2.12175	5.46055	9.68488e-08	5.10098e-07	7.01411
RASAL1	0.480607	6.00933	4.18612	3.69227e-05	0.000117747	1.31499
YDJC	0.480437	6.34398	7.20892	4.25721e-12	4.67904e-11	16.7818
NOL3	0.480309	6.82128	7.14138	6.50429e-12	6.96554e-11	16.3671
GJC3	0.480132	2.14737	4.44922	1.1995e-05	4.20617e-05	2.3841
AURKA	0.480107	5.80157	5.59986	4.6985e-08	2.61391e-07	7.71383
ZNF296	0.479987	3.29064	5.58341	5.1209e-08	2.82526e-07	7.6305
PRSS8	0.479739	8.76578	3.3355	0.00095393	0.00229016	-1.73591
PLA2G2F	0.479514	1.69877	2.91244	0.00384405	0.0080671	-3.01407
WDR62	0.479454	3.81508	6.27375	1.1719e-09	8.57965e-09	11.2976
ECI1	0.479128	6.96069	9.0635	1.41363e-17	3.32067e-16	29.1697
FAM81B	0.478919	2.77861	3.22674	0.00138472	0.00320799	-2.08
TPX2	0.47878	6.76586	4.34406	1.89248e-05	6.37587e-05	1.94985
SKA3	0.477582	4.45288	5.27337	2.50356e-07	1.21236e-06	6.09694
KIF4A	0.477548	5.31104	5.21703	3.3153e-07	1.57013e-06	5.8261
LHB	0.477242	2.45157	3.85836	0.000138639	0.00039721	0.0649857
TTC6	0.477186	2.6157	4.85404	1.91277e-06	7.83488e-06	4.14028
GIPR	0.477152	5.39072	4.29381	2.34593e-05	7.76816e-05	1.7456
RNF224	0.47686	2.06206	5.44541	1.04678e-07	5.46259e-07	6.93897
IGSF9B	0.476591	3.95364	4.81036	2.34611e-06	9.47751e-06	3.94439
KLF5	0.476581	9.092	4.02386	7.18556e-05	0.000217137	0.684701
MFSD6L	0.476259	4.11521	3.66984	0.000285237	0.000765147	-0.612086
HOOK1	0.476176	6.40952	6.57006	2.09853e-10	1.75811e-09	12.9735
TMEM253	0.475763	2.24571	5.49879	7.95182e-08	4.24605e-07	7.20475
SLC52A3	0.475528	5.46211	4.7692	2.84006e-06	1.12458e-05	3.76123
CALML6	0.475397	1.23849	5.51593	7.27676e-08	3.92004e-07	7.29055
TMUB1	0.475048	7.24591	7.85877	6.29847e-14	9.08758e-13	20.9108
FZD5	0.475017	6.87182	6.28379	1.10658e-09	8.11891e-09	11.3535
ERVMER34-1	0.475	3.35159	4.97778	1.06427e-06	4.56725e-06	4.70331
PAM16	0.47468	5.1289	7.99613	2.50821e-14	3.8189e-13	21.8144
EGR4	0.474636	2.00402	4.04963	6.47363e-05	0.000197342	0.783314
ARHGEF28	0.474468	6.70327	7.49087	7.04733e-13	8.81927e-12	18.543
CEP55	0.474272	5.87844	4.41999	1.36277e-05	4.7309e-05	2.26248
SCNN1A	0.474202	8.55884	3.35132	0.000902845	0.00217828	-1.68497
VWA7	0.474003	4.76688	5.17084	4.16643e-07	1.93391e-06	5.60585
CYP4F12	0.473983	4.94482	3.47696	0.000578892	0.00145682	-1.27253
AURKB	0.473958	4.83458	4.59468	6.29293e-06	2.33728e-05	2.99981
GET4	0.473912	5.27336	9.94907	1.92276e-20	6.30064e-19	35.6732
TMEM141	0.473903	8.23883	7.90558	4.60752e-14	6.76685e-13	21.2176
LRP5	0.473815	8.34144	6.47068	3.76029e-10	3.00523e-09	12.4049
RDH12	0.473627	2.74202	4.17573	3.85555e-05	0.000122494	1.27396
ASPHD2	0.473491	5.69923	4.61088	5.85089e-06	2.18551e-05	3.06942
FAM24B	0.473266	4.1776	8.05763	1.65547e-14	2.59489e-13	22.2223
TM7SF2	0.473244	5.63323	6.88034	3.26182e-11	3.13057e-10	14.7907
LY6G6C	0.473101	1.09812	4.01843	7.34476e-05	0.000221358	0.663996
GALNT3	0.473062	8.15065	4.89266	1.59489e-06	6.63025e-06	4.31471
DTL	0.472797	5.14145	5.58702	5.02522e-08	2.78293e-07	7.64876
KIF14	0.472783	4.72808	5.68887	2.93817e-08	1.69433e-07	8.16847
TOM1L1	0.472761	6.64376	7.44299	9.5958e-13	1.16735e-11	18.2406
EPHA1	0.472592	6.35542	6.6015	1.74266e-10	1.48633e-09	13.1548
CELF5	0.472424	1.87515	4.77067	2.82075e-06	1.11798e-05	3.76777
DUSP8	0.472027	5.4112	6.07072	3.6822e-09	2.49098e-08	10.184
CCDC68	0.471362	5.64526	5.17296	4.123e-07	1.91637e-06	5.61595
PDZD7	0.471151	2.78562	6.82835	4.47478e-11	4.20456e-10	14.4819
OCLN	0.471075	6.82081	5.87934	1.05599e-08	6.60265e-08	9.16075
GAD1	0.471043	3.4441	4.73291	3.35748e-06	1.30995e-05	3.60088
LBX2	0.470954	2.90782	6.28457	1.10166e-09	8.08632e-09	11.3578
KIFC1	0.470353	5.62808	4.79499	2.51992e-06	1.0094e-05	3.87587
PLXNA2	0.469879	7.38215	6.56598	2.14964e-10	1.79739e-09	12.9501
GINS1	0.469603	4.76824	5.57234	5.42608e-08	2.98162e-07	7.57448
PRSS22	0.469193	7.13907	3.74062	0.000218298	0.000599871	-0.361502
ZWINT	0.468681	6.37888	5.79677	1.65073e-08	9.96236e-08	8.72736
CREB3L4	0.468477	6.38175	7.32627	2.02517e-12	2.34939e-11	17.5091
KIAA0895	0.467849	5.34776	7.33767	1.88335e-12	2.19686e-11	17.5802
C5orf63	0.467662	4.71251	9.85783	3.85186e-20	1.22675e-18	34.9881
SPEF1	0.467248	1.99474	4.10885	5.08324e-05	0.000158045	1.01206
GAREM1	0.467044	6.2205	5.34172	1.77517e-07	8.85088e-07	6.42875
RAB19	0.467019	3.50548	6.59198	1.84365e-10	1.56601e-09	13.0998
OIP5	0.466768	3.83586	5.62569	4.10241e-08	2.30491e-07	7.84518
RIMKLA	0.466602	4.11128	6.07544	3.58662e-09	2.43309e-08	10.2096
FGF20	0.466055	2.17488	3.45474	0.000626827	0.00156541	-1.34649
ZBTB42	0.46601	5.48419	8.13202	9.98871e-15	1.61022e-13	22.7184
CCNB1	0.465032	6.74388	5.02783	8.3681e-07	3.66228e-06	4.9345
TMEM61	0.464453	3.62979	3.80413	0.000171129	0.000481135	-0.132973
GRHL1	0.464429	5.22004	4.73538	3.31962e-06	1.29756e-05	3.61174
D2HGDH	0.464325	6.13528	6.60934	1.66357e-10	1.42675e-09	13.2001
SPAG5	0.464236	5.79395	6.08661	3.37003e-09	2.2944e-08	10.2701
CDCA5	0.464142	5.27102	4.87293	1.75033e-06	7.22523e-06	4.22544
SAPCD1	0.463799	2.27926	4.435	1.27642e-05	4.45294e-05	2.32486
EXO1	0.46296	4.29657	5.39749	1.33748e-07	6.82262e-07	6.70216
PPP1R26	0.462857	6.87019	9.53583	4.35637e-19	1.23071e-17	32.5971
DCST1	0.462837	1.0925	5.45047	1.01998e-07	5.34079e-07	6.96403
ESYT3	0.462703	3.80392	7.02484	1.34298e-11	1.37923e-10	15.658
CCNB2	0.462532	5.67135	4.56929	7.05129e-06	2.58117e-05	2.89109
WDR90	0.462435	5.73007	7.24202	3.45515e-12	3.84566e-11	16.9861
MYRF	0.462246	7.82748	4.69198	4.05022e-06	1.55631e-05	3.42127
PLPP2	0.461854	7.60426	4.48874	1.00832e-05	3.59131e-05	2.54966
ARHGAP39	0.461664	4.93914	6.41636	5.15834e-10	4.0095e-09	12.0968
CES3	0.461354	5.28794	4.58533	6.5625e-06	2.4268e-05	2.95973
PAK6	0.461178	2.17389	4.27537	2.537e-05	8.33914e-05	1.67119
LPIN3	0.461123	6.59374	7.40264	1.2434e-12	1.48815e-11	17.9868
LEAP2	0.46109	2.71866	6.65206	1.29072e-10	1.12686e-09	13.4477
PPP1R9A	0.460925	6.45494	5.95551	6.96416e-09	4.50854e-08	9.56487
MRPL12	0.460249	6.70071	6.14851	2.38249e-09	1.66266e-08	10.6073
CDK18	0.459957	6.23415	6.14627	2.41269e-09	1.68236e-08	10.595
BIRC5	0.459914	5.65208	4.19948	3.49191e-05	0.000111903	1.36791
TCAP	0.458995	1.92265	4.70955	3.73747e-06	1.4433e-05	3.49821
EMC9	0.458971	5.72035	7.86846	5.90429e-14	8.56047e-13	20.9742
GTF2H2C	0.458919	1.16876	3.02474	0.00269463	0.00585058	-2.69066
ZDHHC12	0.45867	7.02676	7.73977	1.38692e-13	1.90991e-12	20.1365
ARHGAP8	0.457763	4.42455	6.70428	9.45021e-11	8.41464e-10	13.7519
PHKA1	0.457584	5.6541	7.42987	1.044e-12	1.26462e-11	18.158
RAB27B	0.457523	6.8549	4.23564	3.00058e-05	9.74617e-05	1.51181
NTHL1	0.457089	5.96336	7.36629	1.56902e-12	1.84539e-11	17.759
ALDH1L1	0.456828	4.53621	3.08182	0.00224034	0.00494566	-2.52187
TMEM86B	0.45659	3.96682	5.70284	2.72816e-08	1.583e-07	8.24033
SLC45A4	0.456475	6.76183	6.46416	3.90609e-10	3.11297e-09	12.3678
JMJD7-PLA2G4B	0.456202	3.00624	2.933	0.00360485	0.00761491	-2.95572
MIF	0.456079	8.55878	3.58674	0.000388391	0.00101108	-0.900628
KAAG1	0.455689	1.96544	4.11942	4.86703e-05	0.000151794	1.05322
ACHE	0.45567	5.3493	3.31402	0.00102757	0.00244864	-1.80469
CLBA1	0.455552	5.40613	8.45109	1.10741e-15	2.00572e-14	24.8795
MTHFS	0.455548	5.72143	7.9133	4.37541e-14	6.44265e-13	21.2683
SPTBN2	0.455047	7.18701	5.41711	1.21005e-07	6.23238e-07	6.7989
TNFRSF11A	0.454768	5.82274	4.86222	1.84075e-06	7.56375e-06	4.1771
CIT	0.454456	5.03221	6.23091	1.49558e-09	1.08143e-08	11.0603
UGT1A1	0.454381	2.77772	3.03953	0.00256943	0.00560234	-2.64721
GLI4	0.45427	4.94501	6.02401	4.77314e-09	3.17469e-08	9.93182
MELK	0.454106	5.47409	4.3191	2.10603e-05	7.03401e-05	1.84816
KLC3	0.453791	3.27945	3.81619	0.000163333	0.000461505	-0.0891565
PLA2G4D	0.453649	1.39152	5.50877	7.55175e-08	4.05721e-07	7.25467
SAMD12	0.452984	6.46646	6.70021	9.68353e-11	8.60888e-10	13.7281
CARD10	0.452716	7.20686	6.96841	1.9021e-11	1.9085e-10	15.3178
FAM47E	0.452649	3.18581	5.94809	7.25386e-09	4.67829e-08	9.5253
TCEA3	0.452468	7.21075	3.92962	0.000104756	0.000306905	0.328921
CFAP99	0.451985	0.92584	5.10835	5.66126e-07	2.56613e-06	5.31055
CASZ1	0.451787	5.36795	6.15831	2.25471e-09	1.57997e-08	10.6609
FOXO6	0.451684	2.72027	5.3497	1.70492e-07	8.5482e-07	6.46774
LYSMD4	0.45129	4.97008	8.2735	3.79093e-15	6.40879e-14	23.6701
NR1D1	0.451287	6.49855	4.48025	1.04673e-05	3.70949e-05	2.514
CYP2C8	0.451209	3.22509	3.6662	0.000289149	0.000774173	-0.624832
BGLAP	0.451138	1.9311	4.4768	1.06276e-05	3.76158e-05	2.4995
CDCA2	0.451103	4.42881	4.89784	1.55641e-06	6.4925e-06	4.33816
C1orf35	0.45107	5.69881	8.75028	1.34473e-16	2.83043e-15	26.9528
MYO5C	0.451002	7.46755	6.09799	3.16253e-09	2.16439e-08	10.3319
SCRIB	0.45036	7.55315	6.61199	1.63761e-10	1.4066e-09	13.2154
AKR1C4	0.450071	2.52656	2.97761	0.00313194	0.00670083	-2.82779
DGAT1	0.450008	7.4138	7.12966	6.9987e-12	7.4625e-11	16.2954
CFAP157	0.449927	2.53777	5.12213	5.29238e-07	2.41113e-06	5.37543
HNF4G	0.449648	6.15997	4.11959	4.86378e-05	0.000151721	1.05385
ANO8	0.449552	5.76052	6.07485	3.59851e-09	2.44019e-08	10.2063
BTC	0.449548	4.85077	5.74188	2.21562e-08	1.3052e-07	8.442
EPS8L1	0.449523	7.67004	3.07813	0.00226738	0.00500277	-2.53286
UQCC3	0.449244	6.12955	7.84684	6.81946e-14	9.7625e-13	20.8329
POLE2	0.449225	4.16366	7.24229	3.44919e-12	3.84155e-11	16.9878
KCNJ14	0.449067	3.09424	6.89986	2.89559e-11	2.8076e-10	14.9071
HMMR	0.448961	5.13705	4.60298	6.06258e-06	2.25961e-05	3.03545
CLDN12	0.448732	7.70477	7.1144	7.69878e-12	8.15783e-11	16.2022
SH3YL1	0.448477	7.28061	7.1071	8.05723e-12	8.51114e-11	16.1577
FOXI1	0.448315	1.55112	3.16976	0.00167658	0.00381401	-2.25599
FAM98C	0.448266	5.73627	9.16743	6.62866e-18	1.61509e-16	29.9154
TBC1D3L	0.448107	0.864059	3.33978	0.000939859	0.00225925	-1.72216
TRAF4	0.448034	7.86724	8.2351	4.93595e-15	8.23804e-14	23.4108
COBL	0.447807	5.93426	5.71528	2.55341e-08	1.49076e-07	8.30447
CPLX1	0.447216	3.83048	4.41607	1.38623e-05	4.80744e-05	2.24622
RPH3AL	0.447215	5.69421	5.05797	7.23355e-07	3.2112e-06	5.07466
TRIP13	0.447174	4.91462	4.80198	2.43943e-06	9.80791e-06	3.90699
AGMAT	0.446585	4.75813	4.77614	2.75028e-06	1.09285e-05	3.79202
FBXL6	0.446125	6.04183	6.73722	7.75642e-11	7.01294e-10	13.9447
LIPM	0.445949	1.43689	4.25074	2.81556e-05	9.18908e-05	1.57224
BEND7	0.445688	5.03864	6.13722	2.53852e-09	1.76503e-08	10.5456
ASB12	0.445684	1.45633	5.96884	6.4722e-09	4.21573e-08	9.63602
GALNT6	0.445607	6.606	4.01095	7.56971e-05	0.000227613	0.6355
GRHL2	0.445602	6.7349	3.99497	8.07208e-05	0.000241481	0.574817
C2orf50	0.445495	1.48936	5.17697	4.04225e-07	1.88399e-06	5.63501
AQP2	0.445387	2.20845	3.55677	0.000433536	0.00111563	-1.00323
PRICKLE4	0.445373	3.99395	7.16276	5.6893e-12	6.14884e-11	16.4981
SMPDL3B	0.444889	5.95156	4.56042	7.33654e-06	2.68219e-05	2.85321
BCO1	0.44487	4.00973	3.78011	0.000187708	0.000522906	-0.219824
CATSPER3	0.444763	2.41843	7.96066	3.18458e-14	4.75924e-13	21.5801
ELOVL6	0.444455	5.81066	5.90456	9.20461e-09	5.81511e-08	9.29407
CPT1B	0.444372	4.7409	6.45263	4.17769e-10	3.30926e-09	12.3023
DBNDD2	0.443732	5.98298	7.11775	7.53954e-12	8.00405e-11	16.2226
PIMREG	0.443374	3.88688	5.11961	5.35825e-07	2.43918e-06	5.36352
FUT3	0.443247	7.49356	3.00209	0.0028973	0.00625706	-2.75682
KCP	0.443236	4.39312	3.3305	0.000970634	0.00232551	-1.75198
SLC45A3	0.443022	6.72577	4.01214	7.53335e-05	0.0002266	0.640047
TTLL13P	0.442649	1.38446	7.71766	1.60456e-13	2.19187e-12	19.9935
SPATA24	0.442606	3.70629	8.50892	7.39272e-16	1.37108e-14	25.2767
CIART	0.442472	4.71475	4.53597	8.18073e-06	2.96147e-05	2.7492
CABP4	0.442382	4.84504	5.57358	5.39094e-08	2.96519e-07	7.58077
PHOSPHO2	0.442203	4.47063	8.75322	1.31694e-16	2.78227e-15	26.9734
HCN3	0.442167	4.74228	6.6405	1.38267e-10	1.2022e-09	13.3805
CAMK2N2	0.441979	3.04062	3.41192	0.000729843	0.00179708	-1.48779
SLC25A29	0.441881	6.48017	6.31431	9.29224e-10	6.89799e-09	11.5235
RTEL1-TNFRSF6B	0.441832	3.76833	3.28651	0.00112966	0.00266465	-1.89222
TMEM54	0.44181	8.37254	6.17071	2.10257e-09	1.47946e-08	10.7288
KRT19	0.441719	12.354	2.87852	0.00427057	0.00887086	-3.10948
CYP3A7	0.441442	2.44811	5.49293	8.19614e-08	4.36828e-07	7.17548
KIF15	0.441177	4.65585	5.76694	1.93755e-08	1.1554e-07	8.57201
TMEM97	0.441152	7.34098	3.3319	0.000965927	0.00231569	-1.74748
ANKEF1	0.441114	5.49726	6.73687	7.77269e-11	7.02019e-10	13.9427
MAD2L1	0.441063	5.158	5.64755	3.65617e-08	2.07338e-07	7.95669
MYO5B	0.44097	7.44157	6.06725	3.75425e-09	2.53871e-08	10.1652
VILL	0.440653	7.90548	3.16949	0.00167813	0.00381703	-2.25684
DLG3	0.440072	7.69985	8.69662	1.96898e-16	4.05404e-15	26.5777
CCNA2	0.439955	5.95156	5.07647	6.61233e-07	2.95703e-06	5.16107
NYAP1	0.439925	3.24118	4.18371	3.72958e-05	0.000118803	1.30546
F2RL1	0.439907	8.33546	4.59388	6.31553e-06	2.34464e-05	2.99638
GABBR2	0.439816	1.24453	4.06682	6.03665e-05	0.000185317	0.849399
SOWAHA	0.439539	4.06044	3.92403	0.000107099	0.000313177	0.308068
BICDL1	0.439431	6.05361	5.78835	1.72719e-08	1.03686e-07	8.68345
C11orf1	0.439395	5.58487	8.4818	8.93721e-16	1.63965e-14	25.0902
KAZALD1	0.439204	4.52852	4.88222	1.67541e-06	6.93782e-06	4.26744
MANEAL	0.439113	6.26008	6.51884	2.83676e-10	2.31279e-09	12.6796
ZNF524	0.43907	6.60515	7.52525	5.64173e-13	7.15503e-12	18.761
ASS1	0.439042	9.08338	4.35768	1.78478e-05	6.04548e-05	2.0056
TMEM262	0.439038	1.06021	6.21831	1.60644e-09	1.15472e-08	10.9907
KIF2C	0.438999	5.60854	4.40364	1.46318e-05	5.04856e-05	2.19475
CKB	0.438902	7.56229	4.2256	3.12992e-05	0.000101256	1.47175
FERMT1	0.438658	7.66645	3.76845	0.00019629	0.000544764	-0.261797
MZT2B	0.438625	7.93721	4.37844	1.63189e-05	5.57747e-05	2.09084
TFAP2A	0.438484	4.38864	3.41832	0.00071351	0.00175992	-1.46679
STK39	0.438461	8.06084	6.85439	3.82026e-11	3.61755e-10	14.6363
SH3GLB2	0.438398	7.64716	8.03381	1.945e-14	2.99897e-13	22.0641
TRIM11	0.438348	6.09423	8.82611	7.82738e-17	1.71106e-15	27.4853
PPFIA3	0.438345	4.5483	4.8091	2.35984e-06	9.52167e-06	3.9388
SIGIRR	0.438344	7.15825	7.26153	3.05415e-12	3.43532e-11	17.1069
NIPAL1	0.43831	4.80605	5.29677	2.22644e-07	1.08901e-06	6.21012
GOLGA6L9	0.438272	4.63859	8.18382	7.01395e-15	1.14368e-13	23.0657
NAPRT	0.43815	7.81386	4.14613	4.35929e-05	0.000137014	1.15758
MST1	0.437698	4.46602	6.50319	3.10936e-10	2.51934e-09	12.5901
GLS2	0.437553	3.23896	5.3345	1.84111e-07	9.16084e-07	6.39354
PYCR3	0.437249	5.87851	7.72084	1.57127e-13	2.14985e-12	20.0141
ATP1B1	0.4372	10.9336	4.6017	6.09758e-06	2.27067e-05	3.02995
SLC10A5	0.436785	3.25785	6.73786	7.72626e-11	6.98939e-10	13.9485
TRIM40	0.436619	1.25219	3.11054	0.00203944	0.00455002	-2.43582
TGFBR3L	0.436603	1.47546	4.00384	7.78945e-05	0.000233519	0.608472
CKS1B	0.436483	6.87666	6.33751	8.1333e-10	6.08817e-09	11.6532
TMEM151A	0.436271	2.85745	2.91969	0.00375807	0.00790912	-2.99353
MLXIPL	0.436264	5.07864	2.99775	0.0029377	0.00632905	-2.76945
BUB1B	0.436012	5.28603	5.26142	2.6577e-07	1.28044e-06	6.0393
PCLAF	0.435976	5.09189	5.14643	4.69813e-07	2.16007e-06	5.49014
EMC6	0.435967	4.95612	5.73167	2.33985e-08	1.37505e-07	8.38912
DMRTA1	0.435455	3.79616	3.99469	8.08122e-05	0.000241669	0.573748
CISD3	0.435404	7.14433	8.27932	3.64194e-15	6.18148e-14	23.7095
PARD6A	0.435301	5.09849	5.83664	1.33123e-08	8.17043e-08	8.936
E2F7	0.435191	3.95627	4.27387	2.55319e-05	8.39076e-05	1.66515
GRAMD1C	0.435039	5.27474	7.63844	2.6995e-13	3.58396e-12	19.4835
INSC	0.434638	3.42155	2.96247	0.00328573	0.00700256	-2.87143
RAB3D	0.434372	6.76021	5.83432	1.34802e-08	8.26153e-08	8.92385
FAM83G	0.434357	5.95211	6.47936	3.5744e-10	2.86474e-09	12.4543
GIPC2	0.434334	5.94294	3.75302	0.00020822	0.000574589	-0.317162
PDE11A	0.434023	4.5022	5.197	3.66142e-07	1.72302e-06	5.73037
CYP27B1	0.433812	3.61747	5.61751	4.28262e-08	2.39982e-07	7.80355
TRIM36	0.433777	3.88511	5.64515	3.70273e-08	2.09768e-07	7.94444
TTK	0.433703	4.6535	4.58194	6.66301e-06	2.46022e-05	2.9452
PPARG	0.433699	7.1012	3.82742	0.000156379	0.000443922	-0.0482603
ETFB	0.433621	7.25199	6.865	3.58147e-11	3.40851e-10	14.6994
AUNIP	0.43346	3.34207	5.3568	1.64466e-07	8.28515e-07	6.50248
PBLD	0.43317	6.36438	4.14506	4.37859e-05	0.000137545	1.15339
PCDH20	0.432875	3.16472	3.44587	0.000646982	0.00161149	-1.3759
STK31	0.432723	3.58035	3.99266	8.14724e-05	0.000243515	0.566066
SYBU	0.432539	6.01174	3.82636	0.000157022	0.0004456	-0.0521215
GPR160	0.432499	6.17612	4.96274	1.14356e-06	4.88289e-06	4.63424
RAB40C	0.432134	6.6294	7.72497	1.52913e-13	2.09556e-12	20.0408
SLC16A11	0.431717	2.60409	4.16609	4.01314e-05	0.000127027	1.23598
NRG4	0.431699	3.51464	4.57437	6.89284e-06	2.5308e-05	2.9128
CITED4	0.431697	6.75983	3.59723	0.000373663	0.000976622	-0.864534
BBC3	0.431481	5.63383	4.79549	2.51411e-06	1.00772e-05	3.87808
SHROOM3	0.431434	8.2167	5.14478	4.73629e-07	2.17233e-06	5.48235
SLC26A5	0.43132	2.07366	5.00864	9.17824e-07	3.97721e-06	4.84563
PLCH1	0.431193	5.49616	5.24892	2.82886e-07	1.35867e-06	5.9791
CHAC1	0.430727	4.35527	3.64481	0.00031321	0.000831657	-0.699611
KNL1	0.430265	5.14726	5.79185	1.69501e-08	1.02085e-07	8.70168
MRPL23	0.430036	6.80576	7.45562	8.84633e-13	1.08159e-11	18.3202
FOXD4	0.429452	1.96407	5.28078	2.41237e-07	1.17187e-06	6.13273
TH	0.429381	1.33337	2.95393	0.00337541	0.00717033	-2.89593
PLXNB1	0.428527	7.97058	6.2017	1.76495e-09	1.25961e-08	10.8991
EPPK1	0.428348	6.25951	3.72882	0.000228319	0.000624883	-0.403588
C9orf116	0.428317	3.71909	5.19684	3.66427e-07	1.72388e-06	5.72962
TSACC	0.428137	1.63573	5.6818	3.05048e-08	1.75209e-07	8.13213
E2F8	0.428114	4.14004	4.85024	1.94721e-06	7.96638e-06	4.12315
MYBL2	0.428025	6.08184	3.80054	0.00017351	0.000487186	-0.145957
PATJ	0.42791	7.77411	8.97851	2.61658e-17	5.98925e-16	28.5636
MRPL38	0.427909	5.55101	7.02726	1.323e-11	1.362e-10	15.6727
TMEM92	0.42775	5.95227	3.44225	0.000655365	0.00162998	-1.38786
TUBAL3	0.42768	1.67184	3.5798	0.000398444	0.00103455	-0.92448
COL28A1	0.427625	3.7257	3.56179	0.000425648	0.00109698	-0.986102
ABCB9	0.427554	4.14451	7.31689	2.14978e-12	2.48716e-11	17.4506
REM2	0.427496	2.50304	6.06156	3.87492e-09	2.61407e-08	10.1344
SLC22A5	0.42744	5.01279	9.51112	5.23853e-19	1.46292e-17	32.4154
KRT86	0.427397	2.67313	3.7433	0.000216084	0.000594457	-0.351938
SMIM1	0.42724	3.22583	5.02233	8.59281e-07	3.75194e-06	4.90901
KIF11	0.427233	6.08867	5.2933	2.26555e-07	1.10655e-06	6.19332
EPN1	0.426596	7.22307	7.86576	6.01173e-14	8.7014e-13	20.9566
SRRM5	0.426531	2.84785	7.58362	3.86104e-13	4.98972e-12	19.1327
ONECUT2	0.42638	6.982	3.10611	0.0020693	0.00460877	-2.44914
TOX3	0.426113	5.70696	3.27336	0.00118171	0.00277664	-1.9338
PRDM16	0.425996	4.71903	4.38798	1.56594e-05	5.37261e-05	2.13012
FLVCR1	0.425603	5.8864	7.64919	2.51598e-13	3.35339e-12	19.5525
STRC	0.425365	2.11003	5.28466	2.36586e-07	1.15191e-06	6.15152
SULT1C3	0.425208	1.54142	3.60166	0.000367606	0.000962122	-0.849272
PIP5KL1	0.425068	2.47995	4.83276	2.11323e-06	8.59185e-06	4.04466
LNX1	0.424547	5.58816	6.39985	5.67607e-10	4.37629e-09	12.0036
TMEM30B	0.42449	7.83326	6.00473	5.31023e-09	3.5045e-08	9.82823
TOP1MT	0.424488	5.96957	6.58193	1.95652e-10	1.65134e-09	13.0419
PLS1	0.424373	8.31203	3.75869	0.000203761	0.00056329	-0.29685
NPDC1	0.424162	8.19548	4.18963	3.63858e-05	0.000116209	1.32888
LRP8	0.424027	5.25414	4.77028	2.82589e-06	1.11976e-05	3.76602
AATK	0.424001	5.29322	3.80523	0.000170401	0.000479487	-0.128972
APOM	0.423889	3.3985	7.10934	7.94537e-12	8.3982e-11	16.1713
ETV2	0.423728	2.2114	5.94634	7.32349e-09	4.7214e-08	9.51602
ABCC3	0.423649	8.85595	3.57032	0.000412543	0.00106709	-0.956931
S100A6	0.423636	13.6893	3.73534	0.000222734	0.000611071	-0.380365
RBM14-RBM4	0.423236	3.35959	4.42541	1.33093e-05	4.63266e-05	2.285
METTL7B	0.423047	6.0379	3.6664	0.00028893	0.00077371	-0.624123
ACSM1	0.422648	3.35015	4.2856	2.42926e-05	8.01601e-05	1.71243
DNASE1	0.422452	5.07433	5.91146	8.86429e-09	5.62099e-08	9.33064
CENPS-CORT	0.422376	1.90699	4.94379	1.25164e-06	5.31105e-06	4.54747
CTSV	0.421972	4.47761	3.47068	0.000592065	0.00148624	-1.29345
LIPH	0.421843	8.01091	3.38297	0.000808209	0.00197044	-1.58239
DMTN	0.421756	6.51854	5.05305	7.40795e-07	3.28255e-06	5.05174
MCM10	0.421606	4.09017	4.89513	1.57641e-06	6.56463e-06	4.32591
ZNF692	0.42127	6.22453	6.34317	7.87307e-10	5.91158e-09	11.6849
VSIG10	0.421206	6.54644	7.48993	7.09023e-13	8.86644e-12	18.537
TTC32	0.421079	4.48482	6.99608	1.60406e-11	1.63159e-10	15.4844
C11orf80	0.42068	6.12817	7.14453	6.37762e-12	6.84317e-11	16.3864
ADORA2B	0.420517	5.06182	4.08677	5.56464e-05	0.000171881	0.926422
YBX2	0.420085	1.46671	3.3305	0.000970621	0.00232551	-1.75196
EXD3	0.420084	5.26112	6.5227	2.77318e-10	2.26421e-09	12.7017
FBXL15	0.419991	5.83964	4.66586	4.562e-06	1.73532e-05	3.3074
CCSER1	0.419746	4.72237	6.24251	1.4002e-09	1.01636e-08	11.1244
UBXN10	0.419574	5.7355	4.22762	3.10356e-05	0.00010048	1.47978
C1orf159	0.419425	4.76125	6.3523	7.46965e-10	5.62855e-09	11.7361
PLIN5	0.419362	3.45222	3.14776	0.00180379	0.00407505	-2.32317
CAPN15	0.419059	6.79152	5.80488	1.58021e-08	9.5571e-08	8.7697
RNF207	0.418945	5.94163	5.42308	1.17364e-07	6.05584e-07	6.82842
PXMP2	0.418711	5.58445	6.98978	1.66754e-11	1.6901e-10	15.4464
KIF9	0.418572	4.39035	7.77988	1.06383e-13	1.48665e-12	20.3966
C11orf42	0.418507	2.01164	6.34573	7.75773e-10	5.83271e-09	11.6993
MAMDC4	0.418473	4.82089	4.61381	5.77393e-06	2.15913e-05	3.08208
PRRG4	0.4182	6.46039	6.14071	2.4893e-09	1.73222e-08	10.5646
MROH1	0.417955	6.80715	6.78443	5.83698e-11	5.38563e-10	14.2223
KRTDAP	0.417921	0.800031	4.02181	7.24528e-05	0.000218748	0.67688
RAB26	0.417901	4.79176	3.17475	0.00164894	0.00375717	-2.24071
GDPGP1	0.417648	4.1878	9.07387	1.31104e-17	3.09249e-16	29.2439
SPPL2B	0.417494	6.80626	5.50833	7.56885e-08	4.06324e-07	7.25248
FAM155B	0.417392	2.99163	4.1347	4.57005e-05	0.000143136	1.11284
SYT12	0.417351	4.33203	3.1606	0.0017285	0.00392111	-2.28402
ADGRG1	0.417271	8.48428	6.25215	1.32546e-09	9.64989e-09	11.1778
RCCD1	0.416728	5.31253	8.07193	1.50262e-14	2.36754e-13	22.3175
TMEM211	0.416461	1.3512	2.9611	0.0033	0.0070268	-2.87537
PRC1	0.416414	6.48257	5.07754	6.5781e-07	2.94327e-06	5.16606
ZNF219	0.416064	5.94639	5.59252	4.88254e-08	2.71187e-07	7.67664
C6orf141	0.416056	5.8633	3.81677	0.000162966	0.000460654	-0.0870441
SYNE4	0.41604	4.47172	3.48353	0.000565383	0.00142599	-1.25056
HSD17B8	0.4157	6.47877	6.36383	6.98969e-10	5.29504e-09	11.8008
BRSK2	0.415432	3.32369	2.90789	0.00389897	0.00817328	-3.02694
ZNF511	0.415207	6.02223	8.07795	1.44255e-14	2.28006e-13	22.3575
YOD1	0.415062	6.45207	7.04258	1.20329e-11	1.24479e-10	15.7654
FAM160A1	0.414837	5.52562	5.57173	5.44325e-08	2.98955e-07	7.57142
FSCN2	0.414823	2.9386	5.1462	4.70333e-07	2.16188e-06	5.48908
MT3	0.414665	1.19682	3.40193	0.000756039	0.00185487	-1.52051
OR2A7	0.414627	3.22768	4.46352	1.12663e-05	3.96946e-05	2.44385
SGO1	0.414622	4.03903	5.9185	8.52991e-09	5.4292e-08	9.36797
GPR39	0.414336	5.432	5.51946	7.14491e-08	3.8539e-07	7.30823
PLEKHH3	0.413661	6.19762	5.97552	6.23849e-09	4.07443e-08	9.67174
ERICH2	0.413606	3.14138	4.73297	3.35651e-06	1.30987e-05	3.60116
RNF43	0.413603	6.06642	5.12242	5.28511e-07	2.40911e-06	5.37676
DLGAP5	0.41359	5.44672	3.93951	0.000100727	0.000296275	0.365899
SPTSSB	0.413526	5.11986	2.89896	0.00400869	0.00838055	-3.05212
SPAG4	0.413441	5.35998	4.24676	2.86324e-05	9.33215e-05	1.55629
XDH	0.413247	6.31566	3.05696	0.00242879	0.00532299	-2.59576
MALL	0.413049	7.01665	3.41542	0.000720855	0.00177708	-1.4763
NBEAL2	0.413015	8.18257	5.07485	6.66477e-07	2.97813e-06	5.15347
PLAC8L1	0.412829	2.76108	7.03028	1.29853e-11	1.33762e-10	15.6909
LRRC46	0.412627	2.68807	5.55276	6.00952e-08	3.28313e-07	7.47565
TIGD3	0.412251	2.14672	5.86	1.17297e-08	7.28053e-08	9.0588
CACNB1	0.412248	4.92036	5.4821	8.66735e-08	4.60067e-07	7.12143
CENPK	0.412146	4.40727	4.87213	1.75691e-06	7.25063e-06	4.22184
UFSP1	0.411972	3.53798	5.61726	4.28842e-08	2.40228e-07	7.80224
RAB40B	0.41167	5.37033	6.88046	3.25946e-11	3.13007e-10	14.7914
TRIM10	0.411338	3.22587	4.22074	3.19454e-05	0.00010319	1.45236
MZT2A	0.410961	6.59541	5.50656	7.63831e-08	4.09536e-07	7.24365
SIRT7	0.410863	6.28636	6.88707	3.13066e-11	3.01831e-10	14.8308
REC8	0.410799	5.30246	4.19548	3.55077e-05	0.000113575	1.35205
TOR4A	0.410755	7.33807	4.72345	3.50659e-06	1.36343e-05	3.55926
CMTM8	0.410732	5.93378	6.05431	4.03451e-09	2.7142e-08	10.0952
CDC6	0.410643	5.27889	4.31561	2.13768e-05	7.12855e-05	1.83397
CCDC78	0.41064	2.92989	4.64769	4.95439e-06	1.87493e-05	3.22846
ZSCAN4	0.410528	1.60648	3.19291	0.00155174	0.00355571	-2.18484
TK1	0.410475	6.89502	3.75691	0.000205149	0.000566942	-0.303219
OTOP3	0.41042	0.996883	2.90174	0.00397423	0.00831568	-3.04429
TMEM145	0.410033	2.04753	3.38183	0.000811474	0.00197718	-1.58612
AP1G2	0.4099	7.30141	7.45758	8.73519e-13	1.06877e-11	18.3326
CCER2	0.409809	1.36499	4.39924	1.49136e-05	5.13226e-05	2.17659
LSMEM1	0.409532	3.46857	7.05672	1.10225e-11	1.14679e-10	15.8512
CCDC85C	0.40951	5.33758	8.38698	1.73e-15	3.06799e-14	24.441
ID1	0.409452	9.021	3.68923	0.000265187	0.000716105	-0.543849
RAD54L	0.409297	3.98542	4.61463	5.75276e-06	2.15169e-05	3.08559
VWA2	0.409	6.30889	3.71942	0.000236609	0.000645908	-0.437021
RNF103-CHMP3	0.408937	2.29701	3.95219	9.57752e-05	0.000282884	0.413437
TTC9B	0.408878	0.589948	5.16189	4.3542e-07	2.01502e-06	5.56338
PAFAH1B3	0.408605	6.7584	6.5987	1.77181e-10	1.50892e-09	13.1386
SOX13	0.408588	6.4436	7.23407	3.63286e-12	4.03027e-11	16.937
OPLAH	0.408492	6.00071	4.48082	1.04413e-05	3.70103e-05	2.51637
IGF2BP2	0.408313	6.8875	3.88975	0.000122603	0.00035395	0.180694
EPO	0.407965	1.02309	3.1013	0.00210216	0.00467277	-2.46357
TGM3	0.407914	1.4543	3.07976	0.0022554	0.00497699	-2.52801
TSPAN13	0.407825	8.78706	5.63805	3.8439e-08	2.17039e-07	7.9082
SLC25A22	0.407702	6.25569	6.86741	3.52917e-11	3.36438e-10	14.7138
TFAP4	0.40766	4.86053	8.50356	7.67512e-16	1.41727e-14	25.2399
ZNF444	0.407493	5.78398	7.70441	1.7509e-13	2.38031e-12	19.908
EZH2	0.40732	5.60777	6.42204	4.99111e-10	3.8901e-09	12.1289
PIDD1	0.407183	4.99118	5.70242	2.73421e-08	1.58543e-07	8.23818
RAD51	0.406955	4.43584	4.85598	1.89547e-06	7.76965e-06	4.14899
TMEM114	0.406942	0.7447	4.65965	4.69271e-06	1.78304e-05	3.28037
AXDND1	0.406616	2.26663	3.67186	0.000283076	0.000759948	-0.604967
KCNC4	0.406478	4.83756	6.61419	1.6164e-10	1.38909e-09	13.2282
CMBL	0.406427	7.46989	5.28372	2.37705e-07	1.15637e-06	6.14696
PILRB	0.405924	4.545	4.15947	4.12483e-05	0.00013015	1.20997
KRTCAP2	0.405756	7.00958	7.64103	2.65409e-13	3.52641e-12	19.5001
SLC22A18AS	0.405749	4.07287	4.36122	1.75781e-05	5.95875e-05	2.02009
ZNF367	0.405548	4.59042	5.9494	7.20161e-09	4.64988e-08	9.53232
TMEM190	0.405499	1.22829	4.06036	6.19746e-05	0.000189739	0.824536
MPST	0.40534	6.91822	5.30697	2.11511e-07	1.03964e-06	6.25963
ANLN	0.405198	6.63887	3.42139	0.000705769	0.00174336	-1.45666
NEIL1	0.40511	5.22959	5.06725	6.91512e-07	3.07846e-06	5.11798
GRB14	0.404732	4.41648	3.00982	0.00282662	0.0061153	-2.7343
MYADML2	0.404696	0.978992	3.57571	0.000404463	0.00104826	-0.938472
CTU1	0.404464	4.21703	5.85677	1.19374e-08	7.40135e-08	9.04177
MND1	0.404403	3.77018	4.67675	4.34145e-06	1.65772e-05	3.35482
CNTD1	0.404367	3.32421	7.09222	8.83982e-12	9.29164e-11	16.067
RIBC1	0.403754	3.13524	6.0121	5.09829e-09	3.37774e-08	9.8678
PDCD2L	0.403385	5.33189	7.68639	1.97114e-13	2.66406e-12	19.7918
F11R	0.402909	9.5335	6.04565	4.23337e-09	2.83341e-08	10.0484
A1CF	0.402858	4.51142	2.94807	0.00343823	0.00729193	-2.9127
TICRR	0.402302	3.94047	5.27107	2.5326e-07	1.22398e-06	6.08581
MORN1	0.402154	4.00249	8.24363	4.65528e-15	7.77725e-14	23.4683
CCDC150	0.401849	3.10942	6.88356	3.19841e-11	3.07666e-10	14.8099
TSPO2	0.40156	1.96862	4.50832	9.24804e-06	3.31468e-05	2.63215
S100A1	0.401503	3.21513	3.46045	0.000614164	0.00153746	-1.32752
CYP51A1	0.401482	6.67904	5.65027	3.60398e-08	2.04582e-07	7.97062
HIP1R	0.401146	7.75642	5.20979	3.43662e-07	1.62127e-06	5.79145
KLHL35	0.400849	3.25109	5.10089	5.8712e-07	2.6521e-06	5.2755
GIPC1	0.400558	8.74424	6.38335	6.24486e-10	4.78622e-09	11.9106
UGT8	0.400395	7.32141	5.1033	5.80244e-07	2.62313e-06	5.28684
GTSE1	0.400354	4.40393	4.471	1.09019e-05	3.85083e-05	2.47521
EME1	0.399941	3.53357	5.09229	6.12253e-07	2.74956e-06	5.23515
ADAMTS13	0.399782	3.89782	6.15426	2.30667e-09	1.61306e-08	10.6387
LIPT2	0.399774	3.96909	6.19526	1.83041e-09	1.3025e-08	10.8637
SH3RF2	0.399199	6.29746	3.9065	0.000114778	0.000333566	0.242818
PAQR4	0.399046	6.29251	5.07639	6.61497e-07	2.95743e-06	5.16069
FAM72C	0.398833	2.85883	5.69262	2.88028e-08	1.66332e-07	8.18775
ANO5	0.398806	4.59906	3.95429	9.49798e-05	0.000280633	0.421303
BEX5	0.398792	4.92206	3.11598	0.00200329	0.00447583	-2.41942
THOC3	0.398664	5.81624	6.93928	2.2748e-11	2.24914e-10	15.1429
HYAL1	0.398504	6.33592	3.03566	0.00260169	0.00566616	-2.65861
CAPN5	0.398456	7.91668	3.39099	0.000785761	0.00192059	-1.55627
CCNF	0.398395	4.86189	5.91506	8.6917e-09	5.52184e-08	9.34973
MATN4	0.398143	1.5707	3.11428	0.00201453	0.00449798	-2.42455
PSRC1	0.397966	4.55265	6.03424	4.5101e-09	3.01152e-08	9.9869
RMI2	0.397957	5.04683	4.88976	1.61693e-06	6.71695e-06	4.30154
ENTPD6	0.397925	8.05197	7.50053	6.62069e-13	8.31595e-12	18.6042
MGST2	0.397761	7.67025	7.37639	1.47091e-12	1.74205e-11	17.8222
AKAP1	0.397682	7.97885	6.73541	7.84127e-11	7.07087e-10	13.9341
SYNPR	0.397459	1.87781	3.40818	0.000739559	0.00181732	-1.50007
STIL	0.397379	5.18903	5.63043	4.00129e-08	2.25406e-07	7.86934
SFXN4	0.39735	6.6642	8.32553	2.64771e-15	4.59955e-14	24.0228
ESRRA	0.397246	7.66627	7.84114	7.08316e-14	1.0123e-12	20.7956
MSH5	0.397215	4.2132	6.30147	1.00016e-09	7.36349e-09	11.4519
NME2	0.397011	8.7939	4.21565	3.26337e-05	0.000105253	1.43213
N4BP3	0.396651	4.78669	6.28498	1.09913e-09	8.07121e-09	11.36
CRYBG2	0.396451	5.57665	2.99792	0.00293615	0.0063273	-2.76897
FBXO43	0.396359	2.12063	5.77204	1.88535e-08	1.12606e-07	8.59849
ZNF57	0.396338	5.18149	6.62243	1.53933e-10	1.32554e-09	13.2758
CKAP2L	0.396242	4.62991	4.41823	1.37326e-05	4.76344e-05	2.25518
COX19	0.396235	6.08465	9.2857	2.78363e-18	7.13172e-17	30.7699
CDH1	0.3959	10.1891	4.7175	3.60368e-06	1.3964e-05	3.53311
XKR9	0.395853	5.26345	4.88642	1.64258e-06	6.81517e-06	4.28643
STBD1	0.395827	5.39785	6.77016	6.36146e-11	5.82917e-10	14.1383
MECOM	0.395661	7.5454	4.20861	3.36108e-05	0.00010805	1.40414
ZNF837	0.395623	3.47624	5.45566	9.93113e-08	5.21776e-07	6.98984
NUDT12	0.395477	6.13732	6.44385	4.39685e-10	3.46351e-09	12.2524
INSL3	0.395379	2.63141	5.44804	1.03275e-07	5.39601e-07	6.95201
TRIM74	0.395282	2.09919	4.28206	2.46599e-05	8.12932e-05	1.69817
DDR1	0.395227	9.29319	5.79182	1.69527e-08	1.02085e-07	8.70153
CCDC189	0.395166	2.9019	6.89222	3.03389e-11	2.93501e-10	14.8615
PSPN	0.395086	1.82347	5.20165	3.57811e-07	1.68521e-06	5.75256
NOS1AP	0.394893	3.58484	5.95807	6.86715e-09	4.44913e-08	9.5785
DDTL	0.394803	4.27733	7.05739	1.09766e-11	1.14317e-10	15.8553
AP1S1	0.39442	8.10489	8.47506	9.36838e-16	1.71505e-14	25.0439
MAST1	0.394313	2.28852	4.02108	7.26684e-05	0.000219282	0.674074
CBWD6	0.394151	3.50997	7.47159	7.98112e-13	9.86122e-12	18.4211
POU5F1	0.394148	6.14628	3.29844	0.0010843	0.00256871	-1.85436
PROSER2	0.394037	5.34535	4.73837	3.27419e-06	1.28393e-05	3.62494
CA13	0.393996	5.54325	5.19652	3.67e-07	1.72523e-06	5.72812
HSD17B1	0.393779	3.12152	5.28016	2.41986e-07	1.1745e-06	6.12974
YJEFN3	0.393769	2.67846	4.503	9.46801e-06	3.38638e-05	2.60972
CACNA1F	0.393535	2.36836	5.30479	2.1385e-07	1.04902e-06	6.24901
GCKR	0.393472	3.97645	3.00048	0.0029122	0.00628445	-2.7615
SARS2	0.393458	5.05668	7.46343	8.41215e-13	1.03296e-11	18.3695
MTFR2	0.393164	3.4645	4.80865	2.36485e-06	9.53963e-06	3.93676
NT5C	0.39313	7.20335	7.01437	1.43277e-11	1.46525e-10	15.5948
TMEM134	0.393112	5.86111	6.98994	1.66594e-11	1.68949e-10	15.4474
OCIAD2	0.393062	8.60645	5.33811	1.8078e-07	9.00303e-07	6.41116
IGSF5	0.392929	2.68475	3.87039	0.000132271	0.000380182	0.109238
IL37	0.39289	1.33161	3.38296	0.000808244	0.00197044	-1.58243
PGAP2	0.392815	6.10917	10.192	2.97637e-21	1.06515e-19	37.5133
UNC5CL	0.392806	7.08882	2.9284	0.00365719	0.00771398	-2.96882
SP5	0.392624	2.84921	3.36994	0.000845989	0.00205598	-1.62473
CARD14	0.392448	3.45691	5.07156	6.77197e-07	3.02206e-06	5.13811
ASIC3	0.392418	2.71422	4.40998	1.42344e-05	4.92641e-05	2.22099
IPO4	0.392382	5.37154	8.25647	4.26201e-15	7.14833e-14	23.555
MZF1	0.392362	5.76629	5.30837	2.10029e-07	1.03326e-06	6.26641
C8orf82	0.392212	6.08503	7.47153	7.9843e-13	9.86122e-12	18.4207
NAGS	0.392016	4.73223	4.01298	7.50806e-05	0.000225879	0.643223
LARGE2	0.3919	4.51211	3.55405	0.000437858	0.00112514	-1.01248
BCL2L15	0.391826	6.90148	3.19781	0.00152643	0.00350291	-2.16971
ILVBL	0.391751	7.38303	8.2707	3.8647e-15	6.51996e-14	23.6512
HS3ST1	0.391545	6.28036	3.36855	0.000850134	0.00206458	-1.62925
MRM1	0.391167	5.38446	7.24246	3.44559e-12	3.84155e-11	16.9888
INF2	0.391139	8.38174	4.7323	3.3669e-06	1.31244e-05	3.5982
TUBB8	0.390993	0.962317	4.87049	1.7706e-06	7.30178e-06	4.21439
LRRC73	0.39088	2.56942	4.62055	5.60124e-06	2.10148e-05	3.11111
SHB	0.39069	7.36911	5.31231	2.05907e-07	1.01591e-06	6.28554
MUC12	0.390411	3.07777	3.71007	0.000245131	0.000667566	-0.470183
VPS37B	0.390045	7.54445	6.82522	4.5604e-11	4.2732e-10	14.4633
KIF18A	0.390008	4.28896	4.42133	1.35485e-05	4.70723e-05	2.26804
TRAIP	0.389992	3.82653	5.71035	2.62126e-08	1.52462e-07	8.27906
NT5C3A	0.389904	7.40033	8.03624	1.91336e-14	2.95824e-13	22.0802
GSTZ1	0.389576	4.96647	6.7932	5.53575e-11	5.11944e-10	14.2741
GPRIN2	0.389572	5.79402	4.1633	4.05984e-05	0.000128338	1.22502
SLC44A3	0.389376	7.09163	5.11023	5.60964e-07	2.54544e-06	5.31937
C6orf136	0.389261	5.78863	8.53626	6.1034e-16	1.15978e-14	25.4652
ERCC6L	0.389193	4.10105	5.74886	2.13455e-08	1.26137e-07	8.47814
ARHGAP33	0.389113	4.43249	5.66057	3.41313e-08	1.94658e-07	8.02332
C7orf61	0.389068	1.68909	4.37192	1.67854e-05	5.71853e-05	2.06401
PLEKHJ1	0.389035	7.05593	6.93563	2.32625e-11	2.29348e-10	15.121
BUB1	0.388923	5.42948	4.30758	2.21226e-05	7.34843e-05	1.80136
C6orf52	0.388847	2.08179	4.25415	2.77533e-05	9.06298e-05	1.58591
NDUFA7	0.38883	5.31185	6.78825	5.70371e-11	5.26618e-10	14.2449
MAP3K9	0.388519	5.52619	6.01306	5.07138e-09	3.36253e-08	9.87294
ZDHHC13	0.388388	6.32619	9.01246	2.04678e-17	4.70399e-16	28.8054
CLEC19A	0.388352	1.66288	5.18275	3.92864e-07	1.83809e-06	5.66248
MED25	0.38786	6.37747	7.21547	4.08511e-12	4.49679e-11	16.8222
TSPAN15	0.387778	8.75484	4.4093	1.42764e-05	4.93994e-05	2.21818
HSBP1L1	0.387639	5.6293	6.22396	1.55575e-09	1.1197e-08	11.0219
MRPL52	0.387539	7.02586	8.08488	1.37628e-14	2.1814e-13	22.4037
RAD54B	0.387538	4.28462	7.06527	1.04526e-11	1.09127e-10	15.9031
SLC39A11	0.387217	7.38106	6.12881	2.66129e-09	1.84511e-08	10.4997
ANKRD36C	0.387082	6.59843	4.37642	1.64624e-05	5.61863e-05	2.08251
CHAD	0.386511	3.33266	4.22919	3.08315e-05	9.993e-05	1.48604
TRMT61A	0.386044	6.53829	6.86192	3.64913e-11	3.46261e-10	14.6811
SEMA3B	0.385859	7.18851	3.21603	0.0014357	0.00331437	-2.11331
POC1B-GALNT4	0.385772	3.15495	5.08239	6.42479e-07	2.87771e-06	5.18876
ANKRD22	0.385678	7.09995	3.04806	0.0024997	0.00546573	-2.62207
AGBL2	0.385599	3.05555	7.13625	6.71631e-12	7.17039e-11	16.3357
KLC4	0.385543	6.98786	5.91823	8.54232e-09	5.43506e-08	9.36655
ZNF205	0.385538	6.06343	6.68469	1.06246e-10	9.35749e-10	13.6376
CCDC153	0.385288	3.05646	4.53927	8.06159e-06	2.92269e-05	2.76321
ATAD3B	0.384889	5.89786	5.1193	5.36623e-07	2.44216e-06	5.36209
HTR3E	0.384849	1.03573	3.56665	0.000418131	0.00107974	-0.969481
ZFP41	0.384844	5.00726	7.28302	2.66557e-12	3.03843e-11	17.2401
MYO19	0.384757	6.5286	7.87578	5.62271e-14	8.18011e-13	21.0222
EPHX4	0.384683	3.96517	3.23366	0.00135266	0.00313869	-2.05842
TKFC	0.384525	6.33515	8.61409	3.53009e-16	6.94863e-15	26.0036
TSEN54	0.384393	6.65153	7.70942	1.69404e-13	2.30669e-12	19.9403
SDR42E1	0.384099	5.04393	6.12275	2.75321e-09	1.90341e-08	10.4666
PROB1	0.384049	3.9766	6.69591	9.93554e-11	8.80071e-10	13.703
ZMYND10	0.383953	2.75914	3.74261	0.000216647	0.000595815	-0.35438
CRYGS	0.38395	3.82408	6.20995	1.68435e-09	1.20563e-08	10.9446
RNFT2	0.383882	3.25766	5.58641	5.04135e-08	2.79005e-07	7.64566
SPSB2	0.383664	5.83577	5.68457	3.00589e-08	1.7294e-07	8.1464
SAC3D1	0.383282	5.153	5.91988	8.46565e-09	5.39233e-08	9.37531
GRHL3	0.383278	2.47208	3.8105	0.000166969	0.000471232	-0.109852
PEX11A	0.382986	5.63987	6.86097	3.67029e-11	3.47747e-10	14.6755
RBP3	0.382954	0.632586	5.1741	4.09998e-07	1.90723e-06	5.62135
HSPBP1	0.38283	7.08736	6.82309	4.61979e-11	4.32409e-10	14.4507
RAB41	0.382573	1.63293	5.73618	2.28413e-08	1.34416e-07	8.41248
PPIP5K1	0.382318	6.45368	8.69378	2.0091e-16	4.12665e-15	26.5579
EML2	0.382077	7.04959	7.23612	3.58627e-12	3.98638e-11	16.9497
DEPDC1	0.382035	4.50651	4.26861	2.61072e-05	8.56327e-05	1.64398
FUT1	0.381472	5.07648	4.71005	3.7289e-06	1.44098e-05	3.5004
FN3K	0.381291	4.68759	5.30808	2.10337e-07	1.03447e-06	6.265
NCAPG	0.381138	5.28544	4.29318	2.35218e-05	7.78431e-05	1.74307
SCIN	0.380975	5.48228	3.17084	0.00167056	0.00380286	-2.25269
OVGP1	0.380964	4.20763	4.92019	1.40016e-06	5.89274e-06	4.43976
TUBB4B	0.380955	10.0893	6.54962	2.36727e-10	1.95723e-09	12.856
C17orf100	0.380855	4.06468	5.96531	6.59921e-09	4.28984e-08	9.61715
RRNAD1	0.380668	6.68394	9.78812	6.53506e-20	2.03556e-18	34.4669
TEX22	0.380214	2.28347	6.69979	9.70786e-11	8.62599e-10	13.7257
C2CD4C	0.38015	2.69825	3.62383	0.000338637	0.000892208	-0.772585
DUSP28	0.380075	3.9568	9.08206	1.23518e-17	2.91761e-16	29.3026
SLC26A1	0.380003	4.09556	6.14751	2.39596e-09	1.67137e-08	10.6018
PLK4	0.379782	4.6931	5.24424	2.89569e-07	1.38685e-06	5.95659
FAM110A	0.379226	5.55241	5.34502	1.74573e-07	8.71943e-07	6.4449
KCNQ1	0.379099	6.82808	3.39828	0.000765844	0.00187622	-1.53246
MVK	0.379086	5.32489	7.62861	2.87879e-13	3.80416e-12	19.4204
FANCA	0.378569	4.81605	5.27156	2.52628e-07	1.22128e-06	6.08822
RINL	0.378256	5.84677	6.31147	9.44476e-10	6.98075e-09	11.5077
KIF21A	0.378242	6.30814	6.27154	1.18677e-09	8.67731e-09	11.2854
PSMC3IP	0.378227	4.12046	6.18696	1.91831e-09	1.36106e-08	10.8181
BUD23	0.377997	7.19208	9.01318	2.03614e-17	4.68587e-16	28.8105
SFXN2	0.377993	4.63549	6.51415	2.91581e-10	2.3761e-09	12.6528
CTXN1	0.377917	3.98705	3.20965	0.00146689	0.0033804	-2.13309
CA8	0.377907	4.49415	3.25251	0.00126881	0.00295882	-1.99942
SUSD4	0.377581	5.32547	2.98763	0.00303387	0.00651067	-2.79881
SLC12A9	0.377353	6.80733	7.16203	5.71543e-12	6.17158e-11	16.4936
ROPN1B	0.377182	1.05339	4.48797	1.01175e-05	3.60128e-05	2.54642
MACC1	0.377137	7.71379	3.76827	0.000196426	0.000545051	-0.262444
DUSP4	0.377059	7.7488	4.41464	1.39489e-05	4.83449e-05	2.24029
SLC26A6	0.377012	5.79149	5.30564	2.12928e-07	1.0454e-06	6.25318
RAB3IP	0.376577	6.40567	6.56676	2.13979e-10	1.79003e-09	12.9545
SPATA46	0.376086	1.74182	5.34379	1.75666e-07	8.76627e-07	6.43887
CENPM	0.375473	4.76405	3.6048	0.000363374	0.000952659	-0.838457
MANSC1	0.37525	7.11039	5.01611	8.85392e-07	3.85111e-06	4.88022
CALML4	0.375133	6.16269	4.43444	1.27953e-05	4.46195e-05	2.32254
GNRH1	0.37508	4.54232	5.97017	6.42505e-09	4.18662e-08	9.64312
GTF2IRD1	0.375065	6.62107	6.87805	3.30774e-11	3.16928e-10	14.7771
EME2	0.374784	4.09444	5.04936	7.5413e-07	3.33563e-06	5.03457
MYPN	0.374447	1.74962	3.80416	0.000171104	0.000481135	-0.132838
CENPU	0.37442	5.50853	4.22831	3.0946e-05	0.000100247	1.48253
APOBEC3B	0.374223	4.46934	3.27133	0.00118992	0.00279362	-1.9402
MOSPD3	0.37389	5.99131	6.96955	1.88881e-11	1.8974e-10	15.3246
TINAGL1	0.373604	8.83765	3.81653	0.00016312	0.000460982	-0.0879347
DVL1	0.373603	8.16908	5.46992	9.22884e-08	4.88348e-07	7.06074
ABCC6	0.373554	4.30651	3.9614	9.23236e-05	0.000273497	0.44806
NPAS2	0.373346	6.18618	5.64445	3.71636e-08	2.1047e-07	7.94088
JUP	0.373143	10.1959	4.61051	5.86055e-06	2.18815e-05	3.06785
HDAC11	0.373091	6.4194	6.35138	7.50952e-10	5.65358e-09	11.731
ST14	0.372919	9.86561	4.40266	1.46943e-05	5.06497e-05	2.1907
NOC4L	0.372486	6.1457	6.59123	1.85186e-10	1.5708e-09	13.0955
CHCHD10	0.372385	7.15426	5.27445	2.49003e-07	1.20615e-06	6.10216
MFSD13A	0.372186	5.0242	5.80729	1.55983e-08	9.45406e-08	8.78228
VPS37D	0.372178	4.22497	4.44935	1.19881e-05	4.20549e-05	2.38464
RSPH14	0.372001	2.03983	4.48895	1.00736e-05	3.58864e-05	2.55057
CPSF4L	0.371901	0.492596	6.30324	9.90084e-10	7.29881e-09	11.4618
FRMD5	0.371573	4.82078	4.06164	6.1653e-05	0.000188857	0.829457
DNAH11	0.371523	3.55677	3.09183	0.00216831	0.00480412	-2.49195
LIN9	0.370884	4.78602	6.68208	1.0792e-10	9.49019e-10	13.6223
NRAP	0.370878	1.15805	3.45891	0.000617561	0.00154477	-1.33265
CHEK1	0.370869	5.19544	5.38719	1.40949e-07	7.16414e-07	6.6515
CKS2	0.370821	7.10901	3.98781	8.30736e-05	0.000248127	0.547692
MTMR11	0.370759	7.92428	3.47208	0.000589107	0.00147969	-1.28879
TP73	0.370754	3.18036	5.01533	8.88748e-07	3.86275e-06	4.87658
SYT17	0.370511	5.12903	5.00857	9.18124e-07	3.97721e-06	4.84531
TPPP	0.370484	4.91767	3.70839	0.000246697	0.000671281	-0.47615
TIGD4	0.370222	2.94932	6.17258	2.08049e-09	1.46574e-08	10.7391
CPTP	0.370163	6.64343	5.47238	9.11283e-08	4.82509e-07	7.07297
ATP8B1	0.370148	8.02229	4.7405	3.24222e-06	1.27345e-05	3.63434
CC2D1A	0.370045	6.88259	7.7856	1.02427e-13	1.43609e-12	20.4338
VSX1	0.370038	1.38719	3.40602	0.000745223	0.00182912	-1.50714
AK7	0.369977	4.36618	5.54911	6.12488e-08	3.34186e-07	7.45725
RASSF6	0.369931	6.89868	4.16324	4.06087e-05	0.000128346	1.22478
MIA2	0.369894	6.18512	8.12749	1.03012e-14	1.65902e-13	22.6882
DAGLA	0.369585	4.97233	6.31247	9.39099e-10	6.94916e-09	11.5132
SLC25A37	0.36943	7.55198	4.83773	2.0647e-06	8.40859e-06	4.06695
GATD3B	0.369003	4.61166	3.91339	0.000111703	0.000325465	0.268402
AIFM3	0.368963	3.3305	4.77831	2.72277e-06	1.08293e-05	3.80165
MESP1	0.368787	2.46218	4.07196	5.91159e-05	0.000181885	0.869201
PCDH1	0.368772	8.85176	4.7199	3.56429e-06	1.38264e-05	3.54364
ATG4D	0.368661	6.13264	7.04137	1.21229e-11	1.25334e-10	15.7581
TMEM44	0.368585	6.0377	5.95346	7.04303e-09	4.55613e-08	9.55394
TMPRSS7	0.368549	1.06787	4.86817	1.78997e-06	7.36915e-06	4.20395
ENKD1	0.368203	6.59378	5.46511	9.46009e-08	4.98877e-07	7.03681
RNF126	0.367419	6.57828	6.08698	3.36312e-09	2.29061e-08	10.2721
KLHL25	0.367417	5.66565	5.30686	2.11628e-07	1.03992e-06	6.25909
ATP5F1D	0.367391	7.34063	5.57239	5.42459e-08	2.98162e-07	7.57474
AGAP9	0.367273	5.5857	4.31609	2.1333e-05	7.11534e-05	1.83592
MAOA	0.367258	7.64296	3.75204	0.000209001	0.000576653	-0.320677
SIGLEC15	0.367134	2.73454	2.90728	0.00390638	0.00818578	-3.02866
TFCP2L1	0.366986	6.85928	3.10639	0.00206741	0.0046059	-2.4483
FAM72A	0.366916	3.04084	5.68531	2.99411e-08	1.72321e-07	8.1502
ARHGAP32	0.366902	7.50623	5.7671	1.93587e-08	1.1548e-07	8.57285
PROZ	0.366711	1.41308	4.25562	2.75819e-05	9.01047e-05	1.59179
PSORS1C2	0.366635	2.32973	2.91425	0.00382243	0.00803064	-3.00895
C1QTNF12	0.366623	3.30589	2.98726	0.00303746	0.00651672	-2.79989
PPM1H	0.366603	6.42753	4.98587	1.02381e-06	4.4081e-06	4.74056
KLHDC4	0.366526	5.648	8.0537	1.70014e-14	2.65512e-13	22.1962
POU5F1B	0.366457	2.00703	5.10024	5.88991e-07	2.65984e-06	5.27244
DNMBP	0.36643	7.47821	6.43396	4.65704e-10	3.65493e-09	12.1964
PPM1J	0.366282	3.43019	5.45618	9.90469e-08	5.20708e-07	6.99242
GCOM1	0.366276	4.04696	5.01523	8.89153e-07	3.86352e-06	4.87615
ATOH7	0.3661	0.967306	5.57042	5.48069e-08	3.00775e-07	7.56479
MACROD2	0.366091	4.68497	2.8538	0.00460807	0.00949013	-3.17834
SPA17	0.365977	4.56693	6.63701	1.4116e-10	1.22547e-09	13.3603
FANK1	0.365885	4.61914	4.97496	1.07868e-06	4.62441e-06	4.69038
BOP1	0.365879	7.16787	5.67338	3.18957e-08	1.82766e-07	8.08894
CCDC192	0.365846	1.73391	5.21564	3.33829e-07	1.57882e-06	5.81944
STXBP2	0.365646	7.19123	6.45424	4.13869e-10	3.28143e-09	12.3114
ZNF888	0.365332	5.96027	4.36605	1.72156e-05	5.84611e-05	2.03992
NUDT14	0.365208	6.46053	6.18136	1.97998e-09	1.40189e-08	10.7873
CDK10	0.365088	7.11815	6.35919	7.17907e-10	5.42883e-09	11.7748
CDHR3	0.365066	3.73536	4.38886	1.55999e-05	5.35324e-05	2.13375
SYCE2	0.36502	1.87919	5.29695	2.22435e-07	1.08831e-06	6.21103
LMTK2	0.36501	7.24991	6.75534	6.95566e-11	6.32932e-10	14.0511
BRICD5	0.36498	3.75316	4.57633	6.83275e-06	2.51199e-05	2.92117
C4orf19	0.364966	6.83509	3.71492	0.000240675	0.000656061	-0.45299
REEP4	0.364947	6.51869	6.17226	2.08422e-09	1.46776e-08	10.7374
BATF2	0.364882	5.37707	3.79461	0.000177525	0.000496981	-0.167443
PSMG3	0.364835	7.23986	6.5871	1.89762e-10	1.60611e-09	13.0717
KIF20A	0.36482	5.48118	3.76077	0.00020214	0.000559265	-0.289357
RPL8	0.364819	12.439	6.53871	2.52419e-10	2.07486e-09	12.7934
NUTM1	0.364319	1.79395	4.55422	7.5421e-06	2.75018e-05	2.82682
MOCOS	0.364315	5.17367	4.61985	5.61894e-06	2.10678e-05	3.10809
SURF2	0.364251	6.34547	6.48126	3.53496e-10	2.8358e-09	12.4651
SLC7A11	0.363766	5.91502	3.09227	0.00216523	0.00479792	-2.49065
PCBD1	0.363426	8.16459	7.45861	8.67754e-13	1.06248e-11	18.3391
TMEM74B	0.363359	4.13737	3.35498	0.000891395	0.00215371	-1.67315
TMEM79	0.363321	5.17059	5.86286	1.15491e-08	7.17895e-08	9.07385
MYCN	0.363218	2.69883	3.40708	0.000742435	0.00182307	-1.50367
DNAJC22	0.363041	6.46114	4.12304	4.7951e-05	0.000149716	1.06732
PSMG4	0.363014	4.61016	6.86259	3.63433e-11	3.4542e-10	14.6851
SLC4A9	0.362693	1.21757	5.84221	1.2917e-08	7.93354e-08	8.96525
HAGHL	0.362668	4.59828	3.87561	0.000129595	0.000372867	0.12848
MTG1	0.362491	5.53673	6.57994	1.97962e-10	1.66836e-09	13.0304
CHKA	0.362318	7.15778	5.94478	7.38649e-09	4.76022e-08	9.5077
DLX4	0.3623	1.07893	4.24583	2.87452e-05	9.36532e-05	1.55256
CDCP1	0.361991	8.34762	4.14891	4.30945e-05	0.000135548	1.16847
MRPL41	0.361715	7.42452	5.06265	7.07131e-07	3.1441e-06	5.09649
PPL	0.361688	8.4425	3.50905	0.000515679	0.00130957	-1.16492
OSBP2	0.36119	4.51356	5.09531	6.03302e-07	2.7151e-06	5.24932
KIF22	0.361027	6.82081	6.97543	1.82172e-11	1.83326e-10	15.36
WDR97	0.360751	2.41354	5.54761	6.1729e-08	3.3659e-07	7.4497
SLC27A5	0.360641	3.57907	5.95852	6.8502e-09	4.44153e-08	9.5809
ZNF653	0.360576	4.47659	6.88888	3.09621e-11	2.98849e-10	14.8416
FOXP4	0.360533	7.0335	4.93973	1.27607e-06	5.40661e-06	4.5289
HSPA1B	0.360514	9.31701	2.91375	0.00382842	0.00804025	-3.01037
TJP2	0.359769	8.35136	5.84722	1.25713e-08	7.74919e-08	8.99157
GALNT4	0.359763	5.90401	4.17513	3.8651e-05	0.000122752	1.27162
FGFBP3	0.359713	3.16977	5.46965	9.2416e-08	4.8887e-07	7.0594
CCHCR1	0.359588	6.1897	6.41981	5.05614e-10	3.93366e-09	12.1163
HS3ST5	0.359318	1.97746	3.78309	0.000185567	0.000517366	-0.209052
GOT1	0.359279	7.56804	6.97623	1.81274e-11	1.8253e-10	15.3648
ZNF784	0.3591	5.06054	6.87868	3.29506e-11	3.16069e-10	14.7808
RHPN2	0.358862	7.73126	3.44159	0.000656921	0.00163337	-1.39006
FBRSL1	0.35867	5.79933	5.8484	1.24915e-08	7.70555e-08	8.99775
ELOVL7	0.358449	5.96351	4.45685	1.16003e-05	4.07954e-05	2.41599
ACSM3	0.358269	5.30653	3.1133	0.00202101	0.00451126	-2.42749
ZNF787	0.358199	6.54609	6.48996	3.35971e-10	2.70927e-09	12.5147
CAMK2N1	0.358168	8.63705	4.57978	6.72796e-06	2.47853e-05	2.93593
HCAR1	0.357895	4.22405	3.18927	0.00157076	0.003593	-2.19605
POLR2H	0.357779	7.51417	8.22218	5.39355e-15	8.97536e-14	23.3237
CENPS	0.357746	4.65546	6.81683	4.79826e-11	4.4739e-10	14.4137
FBXO16	0.357725	3.17711	5.73	2.3608e-08	1.38544e-07	8.38048
TRPM4	0.357712	7.2878	4.0957	5.36502e-05	0.000166229	0.960994
ADRB1	0.357638	2.34132	3.68259	0.000271897	0.000733294	-0.567249
C2orf88	0.357575	5.35958	3.45664	0.000622585	0.0015555	-1.34018
ACOT4	0.357311	4.44901	5.02089	8.65274e-07	3.77133e-06	4.90233
DTX2	0.357237	6.567	5.35218	1.68362e-07	8.4514e-07	6.47987
SLC37A1	0.357127	6.95213	5.72756	2.39165e-08	1.4021e-07	8.3679
ACADS	0.356947	6.75712	5.85344	1.21548e-08	7.51695e-08	9.02426
SHROOM1	0.356931	6.6399	5.2988	2.20385e-07	1.0789e-06	6.21996
SPRN	0.356853	3.7689	5.46076	9.67406e-08	5.09686e-07	7.01519
ZNF33B	0.356649	7.15834	6.35676	7.2802e-10	5.49476e-09	11.7612
SGSM3	0.356425	8.17528	5.77224	1.88333e-08	1.12543e-07	8.59953
SCAND1	0.356421	7.23437	4.35633	1.79521e-05	6.07584e-05	2.00006
GPR143	0.356303	3.9819	3.04667	0.00251096	0.00548611	-2.62618
DNMT3B	0.35625	4.37329	5.65649	3.48761e-08	1.98573e-07	8.00241
DLGAP1	0.356203	1.9845	3.47886	0.000574945	0.00144775	-1.26616
UGT1A9	0.356	2.58329	3.24424	0.00130496	0.00303564	-2.02533
LTO1	0.355909	5.30135	8.36923	1.95668e-15	3.44842e-14	24.32
PMEL	0.355697	3.61218	5.06971	6.83296e-07	3.04768e-06	5.12948
ATP7B	0.355212	5.63433	3.06854	0.00233921	0.00514722	-2.56139
CPNE7	0.355105	5.33929	3.09455	0.00214913	0.00476568	-2.48382
RAP1GAP2	0.354927	7.18218	3.96051	9.26519e-05	0.000274374	0.444711
SIRT6	0.354841	6.22436	6.52055	2.80845e-10	2.2908e-09	12.6894
LENG9	0.354609	5.4431	5.04992	7.52079e-07	3.32829e-06	5.03719
RBM47	0.354513	8.033	5.91475	8.70636e-09	5.52909e-08	9.34809
MROH7	0.354308	3.55904	5.40837	1.26527e-07	6.48539e-07	6.75578
RAD9A	0.35423	5.53267	6.73658	7.78628e-11	7.02873e-10	13.941
RDH5	0.35418	3.71944	4.06959	5.96891e-05	0.000183469	0.860074
CDKN3	0.354004	4.95296	3.97706	8.67288e-05	0.000258318	0.507048
ANKZF1	0.353835	6.99653	7.41386	1.15701e-12	1.39457e-11	18.0573
TMEM63B	0.353783	7.45656	6.99071	1.65804e-11	1.68247e-10	15.452
BOLA2B	0.353676	4.33575	5.83967	1.3096e-08	8.04056e-08	8.9519
SLC50A1	0.353388	7.99505	6.02188	4.82971e-09	3.2073e-08	9.92038
CCDC58	0.353289	5.82506	6.93338	2.35861e-11	2.32269e-10	15.1075
STK32A	0.353111	4.71887	3.95562	9.44755e-05	0.00027924	0.426324
MCM7	0.352883	8.16869	5.94024	7.57282e-09	4.86187e-08	9.48351
MFSD10	0.35274	8.07337	4.97977	1.05414e-06	4.52838e-06	4.71249
CTAGE8	0.352577	4.38938	6.49418	3.27776e-10	2.64696e-09	12.5387
PFKP	0.352485	8.94688	4.72174	3.5342e-06	1.37292e-05	3.55175
SRPK3	0.352452	2.64335	3.51336	0.0005077	0.00129217	-1.1504
ASAH2B	0.352449	4.74531	8.75838	1.26936e-16	2.69178e-15	27.0096
GAS8	0.352446	6.01878	9.32047	2.15445e-18	5.63121e-17	31.0223
CARMIL3	0.352339	2.95672	4.66643	4.55015e-06	1.7312e-05	3.30989
DNAH3	0.352336	3.09846	3.98418	8.42901e-05	0.000251539	0.533968
TMEM177	0.352165	5.27051	7.47317	7.9001e-13	9.77142e-12	18.4311
L3MBTL1	0.351899	4.273	6.80996	5.00198e-11	4.65365e-10	14.3731
INPP1	0.351844	7.14411	5.9594	6.81685e-09	4.42328e-08	9.58564
LONRF3	0.351809	5.10849	5.34515	1.74463e-07	8.71735e-07	6.44551
PEX11G	0.351553	4.50076	5.22433	3.19726e-07	1.52015e-06	5.86105
ANKS6	0.351511	6.38857	6.8353	4.28983e-11	4.04643e-10	14.5231
LETM2	0.351425	4.39203	4.25591	2.75476e-05	9.00272e-05	1.59297
PKP2	0.351406	6.96356	4.40277	1.46868e-05	5.06342e-05	2.19118
PDE6C	0.351198	0.964098	5.09795	5.95587e-07	2.68535e-06	5.26171
FANCI	0.351148	6.06269	4.86202	1.8425e-06	7.56712e-06	4.17619
KIF24	0.351145	4.34036	5.75073	2.11327e-08	1.2501e-07	8.48785
EPB41L1	0.351127	7.78486	4.84948	1.95417e-06	7.991e-06	4.11973
ABHD3	0.350927	6.74468	4.73625	3.30623e-06	1.29381e-05	3.61562
PCYT2	0.350838	6.59914	5.68882	2.93895e-08	1.69433e-07	8.16822
CHAF1B	0.350755	4.6075	6.17615	2.03899e-09	1.43829e-08	10.7587
C1GALT1	0.35068	7.50515	5.4753	8.97644e-08	4.75731e-07	7.08755
POLQ	0.350679	4.47658	4.88499	1.65372e-06	6.85371e-06	4.27994
RTKN	0.350655	7.03644	7.58224	3.89601e-13	5.03109e-12	19.1238
RAVER2	0.350397	6.23817	6.10526	3.03652e-09	2.08218e-08	10.3714
SLC9C2	0.350299	1.52584	4.3696	1.69541e-05	5.77021e-05	2.05449
ORC1	0.350115	4.16411	4.36428	1.73474e-05	5.88759e-05	2.03267
SPATA25	0.349785	3.09989	5.84904	1.24484e-08	7.68456e-08	9.0011
C11orf52	0.349688	3.49508	6.5558	2.28261e-10	1.90016e-09	12.8915
NEIL3	0.349589	3.4689	4.5301	8.39695e-06	3.03586e-05	2.7243
POLD2	0.34958	7.75639	8.26084	4.13593e-15	6.94372e-14	23.5845
KIF18B	0.349481	5.04922	4.48803	1.01146e-05	3.601e-05	2.54669
TEKT5	0.349453	1.65557	4.40855	1.43231e-05	4.95309e-05	2.21507
RP1L1	0.349432	2.49505	2.87969	0.00425519	0.00884262	-3.10621
GPR89B	0.349383	4.85501	7.92421	4.06697e-14	6.0093e-13	21.3401
ALDH3B1	0.349145	7.43211	3.56763	0.00041664	0.00107638	-0.966149
CBX8	0.349142	4.76541	6.00534	5.2924e-09	3.49472e-08	9.83149
FAM189B	0.349105	5.96667	6.61557	1.60327e-10	1.37851e-09	13.2361
AACS	0.348905	6.11197	7.112	7.81477e-12	8.27557e-11	16.1876
C21orf58	0.348851	4.24069	4.2837	2.44892e-05	8.07617e-05	1.70477
SPATA33	0.348802	4.59922	7.503	6.51579e-13	8.20844e-12	18.6198
FRAT2	0.348409	6.44426	5.77308	1.87478e-08	1.12071e-07	8.60394
EXOSC5	0.348226	6.37517	5.74695	2.15648e-08	1.27345e-07	8.46823
KCNK15	0.348121	3.73467	3.27433	0.00117778	0.00276818	-1.93073
COL27A1	0.347924	6.49025	4.26424	2.6595e-05	8.71821e-05	1.6264
IFI27L1	0.347902	5.16888	5.60587	4.55265e-08	2.53692e-07	7.74436
RRM2	0.347627	6.37854	3.39674	0.000770013	0.00188535	-1.5375
LSM4	0.347246	8.06726	7.82673	7.79583e-14	1.10949e-12	20.7016
NUDT13	0.347179	4.41449	7.32791	2.00418e-12	2.32663e-11	17.5193
TMPRSS9	0.347019	1.74134	5.12084	5.32609e-07	2.42584e-06	5.36932
ACBD4	0.346766	5.95617	6.61759	1.58415e-10	1.36275e-09	13.2478
NUSAP1	0.346745	6.57017	3.94681	9.78473e-05	0.000288454	0.393249
RPA3	0.346672	6.21385	6.45928	4.01883e-10	3.18937e-09	12.3401
TMPRSS5	0.346579	2.94248	3.54778	0.000448008	0.00114973	-1.03385
MRPS12	0.346491	6.9662	5.46676	9.38026e-08	4.95128e-07	7.04501
PLCB3	0.346376	7.77914	4.97595	1.07361e-06	4.60387e-06	4.6949
SPATA2L	0.346372	6.00662	5.50358	7.75719e-08	4.15386e-07	7.22871
UGT1A7	0.34636	2.42493	3.65321	0.000303551	0.00080866	-0.670311
ZSWIM5	0.346327	4.5777	4.49483	9.81599e-06	3.50274e-05	2.57528
CACFD1	0.346299	7.13689	5.95073	7.14919e-09	4.6213e-08	9.53941
ABCG5	0.346271	1.59964	3.13463	0.00188386	0.00423403	-2.36304
FAM83B	0.346007	6.09991	3.63967	0.000319272	0.000845378	-0.717537
INO80B	0.345872	5.48814	6.40679	5.45239e-10	4.22262e-09	12.0428
CDC42EP5	0.345753	7.35773	3.0957	0.00214103	0.00475049	-2.48036
REXO5	0.345661	4.0187	6.42021	5.04417e-10	3.92794e-09	12.1186
ARHGAP11A	0.345626	5.62441	4.93765	1.28875e-06	5.45625e-06	4.5194
PIH1D2	0.345513	3.29867	6.80426	5.17775e-11	4.80928e-10	14.3393
SDHAF1	0.345484	6.33701	7.33283	1.94237e-12	2.26105e-11	17.55
COQ4	0.345464	6.86276	7.32887	1.99193e-12	2.31398e-11	17.5253
PCLO	0.345379	4.94809	3.3039	0.0010641	0.00252707	-1.83698
PITPNM3	0.345252	4.88582	4.33126	1.99925e-05	6.71299e-05	1.89764
FAM86B2	0.345146	2.04836	4.83656	2.07604e-06	8.44873e-06	4.06169
SLAIN1	0.344976	4.94165	4.23488	3.0102e-05	9.77368e-05	1.50877
PIWIL4	0.344656	5.70225	4.3912	1.54423e-05	5.30133e-05	2.14341
CSKMT	0.34463	3.93181	6.90069	2.88089e-11	2.79654e-10	14.9121
PRICKLE3	0.34455	5.2925	6.62689	1.49914e-10	1.2942e-09	13.3016
TOP2A	0.344517	7.47339	3.18947	0.00156973	0.00359112	-2.19545
CLTB	0.344512	9.58053	4.37965	1.62341e-05	5.55185e-05	2.0958
FITM1	0.344223	2.27543	3.1994	0.00151832	0.0034857	-2.16481
CIB1	0.344184	9.6046	5.71281	2.58716e-08	1.50788e-07	8.29175
MMAB	0.344181	5.87586	6.6034	1.72313e-10	1.47115e-09	13.1658
PLEKHG3	0.344147	7.05063	5.71063	2.61736e-08	1.52287e-07	8.2805
VPS9D1	0.34408	6.39516	5.8062	1.56901e-08	9.49951e-08	8.7766
HPCAL1	0.344014	7.00542	5.36694	1.56226e-07	7.88406e-07	6.55212
TMEM229A	0.343988	1.03345	3.03729	0.00258806	0.00563917	-2.65381
AQP11	0.343851	3.8413	6.32665	8.65703e-10	6.45463e-09	11.5925
C9orf43	0.343805	2.39874	5.854	1.21176e-08	7.49667e-08	9.02724
PLEKHD1	0.343769	1.08393	4.0928	5.42907e-05	0.000168152	0.949763
HMBS	0.343598	5.38904	5.84375	1.28101e-08	7.87358e-08	8.97331
TPGS1	0.343379	4.06938	3.40939	0.000736398	0.00181084	-1.49609
CCDC87	0.343	2.24963	5.2149	3.35063e-07	1.58422e-06	5.81588
ACSS2	0.34284	7.30732	5.90665	9.09987e-09	5.75535e-08	9.30518
RIPPLY3	0.342806	3.09432	4.69223	4.04559e-06	1.55522e-05	3.42237
ESCO2	0.342631	3.88835	4.33295	1.98486e-05	6.6673e-05	1.90451
FABP7	0.342494	0.815634	3.0236	0.00270451	0.00586977	-2.694
TP53AIP1	0.34222	1.31728	4.28725	2.41226e-05	7.96917e-05	1.7191
PNPLA2	0.341962	8.01368	5.28426	2.37059e-07	1.15388e-06	6.14959
TUBA4A	0.341865	8.21986	5.26452	2.61686e-07	1.26255e-06	6.05424
POP7	0.341446	7.16799	7.14775	6.25035e-12	6.71508e-11	16.4061
CFAP45	0.341272	3.22983	3.0456	0.00251963	0.00550364	-2.62933
POLB	0.341132	6.33299	5.40254	1.30349e-07	6.66973e-07	6.72703
CDNF	0.341101	2.9486	5.14147	4.81393e-07	2.20557e-06	5.46669
FIZ1	0.340988	4.861	8.03905	1.87727e-14	2.91302e-13	22.0989
FGF17	0.34066	1.28495	4.00896	7.63043e-05	0.000229196	0.627952
DIRAS2	0.340623	3.02458	2.84273	0.00476694	0.00979122	-3.209
LPAR2	0.340469	6.34134	4.51079	9.14745e-06	3.28139e-05	2.64259
MGAT4B	0.340441	8.68974	6.0899	3.30874e-09	2.25628e-08	10.288
KHK	0.340414	4.28003	4.52843	8.4593e-06	3.05451e-05	2.71724
HTATIP2	0.340321	8.04335	5.95663	6.92142e-09	4.48258e-08	9.57085
SLC16A13	0.340235	4.00983	5.8087	1.54803e-08	9.39253e-08	8.78965
CENPH	0.340067	4.76645	4.63357	5.28141e-06	1.98895e-05	3.16733
ITGA3	0.339985	9.64882	3.20291	0.00150051	0.00344993	-2.15395
UBALD2	0.339895	8.07492	5.19651	3.67018e-07	1.72523e-06	5.72807
ATAD3C	0.339816	4.51677	4.09657	5.34591e-05	0.000165697	0.964372
CYB561	0.339737	8.35183	5.87139	1.10265e-08	6.87923e-08	9.11879
RNASEH2A	0.339514	6.13861	5.95457	7.00025e-09	4.53019e-08	9.55985
PPAN	0.339288	5.47238	5.89562	9.66444e-09	6.08527e-08	9.24675
LRRC1	0.33922	6.96025	5.91468	8.7099e-09	5.52928e-08	9.34769
FKBP4	0.338904	8.48231	4.936	1.29891e-06	5.49515e-06	4.51186
DBP	0.338781	4.88859	4.04874	6.49703e-05	0.00019802	0.779903
SLC52A2	0.338769	7.80673	5.36548	1.57386e-07	7.9379e-07	6.54497
MRRF	0.338655	6.14331	9.09018	1.1644e-17	2.75424e-16	29.3607
PRKAR1B	0.33851	5.84695	5.12782	5.14722e-07	2.3494e-06	5.40222
CAMKMT	0.338395	4.53051	7.88439	5.30876e-14	7.74988e-13	21.0786
EIF4EBP3	0.338348	5.37702	4.32893	2.01931e-05	6.77365e-05	1.88814
PET117	0.33822	5.58998	7.05618	1.10593e-11	1.14967e-10	15.8479
TELO2	0.338137	6.60622	5.29092	2.2927e-07	1.11789e-06	6.18182
ANKRD9	0.338028	5.84131	5.8111	1.5281e-08	9.28158e-08	8.80222
GGT7	0.338027	6.58841	5.58605	5.05088e-08	2.79351e-07	7.64383
PLCXD1	0.337842	5.95776	4.6254	5.47985e-06	2.05867e-05	3.13206
EXOSC4	0.337786	6.50046	5.51519	7.30471e-08	3.93261e-07	7.28684
C11orf98	0.337777	5.94209	6.79606	5.4407e-11	5.03428e-10	14.291
SLC16A8	0.337686	2.58051	4.5017	9.52264e-06	3.40449e-05	2.60423
TMCO6	0.337652	5.35592	8.50654	7.51714e-16	1.39264e-14	25.2603
CXXC4	0.337613	4.28619	3.12377	0.00195258	0.00437343	-2.39591
PGAP3	0.337139	7.40282	4.79896	2.47393e-06	9.93017e-06	3.89353
TYMS	0.337068	5.8152	4.06412	6.10348e-05	0.000187199	0.838987
MYH7B	0.336898	2.80986	6.04763	4.18704e-09	2.80682e-08	10.0591
DNA2	0.336876	4.58526	6.14025	2.49568e-09	1.73595e-08	10.5621
SPATA12	0.336801	3.3384	5.24611	2.86877e-07	1.37589e-06	5.96559
TMEM139	0.336625	5.95046	2.92406	0.00370713	0.00780867	-2.98114
GCAT	0.336512	5.75502	3.58072	0.000397094	0.001032	-0.921313
SLC9C1	0.336379	2.81229	6.63491	1.42935e-10	1.24025e-09	13.3481
LRRC45	0.336226	5.89476	5.26784	2.57378e-07	1.24318e-06	6.07025
C1orf56	0.336011	4.82506	6.99712	1.59381e-11	1.62311e-10	15.4906
PTGES2	0.335859	7.55098	6.6839	1.06749e-10	9.39205e-10	13.633
TEX49	0.335852	0.792584	3.79685	0.000175999	0.000493199	-0.159339
TSGA10	0.335586	4.29848	6.3142	9.29795e-10	6.89923e-09	11.5229
GAS2L2	0.335565	1.77218	2.93574	0.00357403	0.00755326	-2.94792
PLP2	0.335506	9.50795	6.09583	3.20096e-09	2.18805e-08	10.3201
KIAA1958	0.335451	4.54437	6.34326	7.86871e-10	5.91092e-09	11.6854
ECHDC2	0.335222	6.38183	5.59184	4.89999e-08	2.71889e-07	7.67318
CENPE	0.335156	5.16278	4.24907	2.83551e-05	9.2524e-05	1.56554
C9orf50	0.334776	1.73823	4.27054	2.58943e-05	8.5e-05	1.65176
SULT1A2	0.334615	2.9016	4.57278	6.94226e-06	2.54565e-05	2.90598
TMED3	0.334502	7.47042	6.00345	5.34801e-09	3.52807e-08	9.82134
COCH	0.334169	3.91153	3.49779	0.000537089	0.00135906	-1.20279
FRK	0.334157	6.14272	4.78268	2.66816e-06	1.0642e-05	3.82107
PLCH2	0.334103	4.75642	2.85215	0.00463142	0.00953591	-3.18292
PCK2	0.334038	6.87405	5.3998	1.3218e-07	6.75677e-07	6.71356
PDE4C	0.334004	5.11685	3.16006	0.00173161	0.00392555	-2.28567
POLE	0.333667	5.88718	7.01633	1.41553e-11	1.45024e-10	15.6066
WBP2NL	0.333447	2.74782	5.46669	9.38379e-08	4.9516e-07	7.04464
TMEM160	0.333358	5.47977	4.05334	6.37702e-05	0.000194746	0.79753
GALNT7	0.333352	7.5926	4.28736	2.41116e-05	7.96709e-05	1.71953
SNRPD1	0.333246	7.1773	6.07648	3.56602e-09	2.42105e-08	10.2152
RIPPLY1	0.333207	1.02485	4.53793	8.10953e-06	2.93944e-05	2.75755
B3GNT8	0.332965	4.75411	3.88323	0.00012578	0.000362629	0.156606
DOLPP1	0.332955	6.50856	7.61535	3.13936e-13	4.12179e-12	19.3355
LRRC36	0.332925	3.34828	3.88847	0.000123219	0.000355666	0.17598
SIPA1L3	0.33257	7.33912	5.22319	3.21541e-07	1.52622e-06	5.8556
ZNF768	0.332452	7.52195	8.65177	2.70527e-16	5.43836e-15	26.2653
KLHL17	0.332417	4.86923	4.78067	2.69306e-06	1.07363e-05	3.81217
ACOT8	0.33238	5.85411	7.77558	1.09456e-13	1.52583e-12	20.3687
GLUD2	0.332209	3.47459	4.46738	1.1077e-05	3.90519e-05	2.46001
NR6A1	0.331854	4.63966	5.54528	6.24818e-08	3.40233e-07	7.43797
RNF128	0.331825	8.01749	2.95711	0.00334174	0.00710704	-2.88681
IGSF23	0.331747	0.958897	3.4587	0.000618016	0.00154545	-1.33333
SSH3	0.331739	7.44354	4.89488	1.57827e-06	6.57079e-06	4.32477
ZNF341	0.331515	4.46543	6.88594	3.15231e-11	3.03747e-10	14.8241
LCLAT1	0.331435	6.29063	7.97774	2.83894e-14	4.27273e-13	21.6929
FAM222B	0.331085	6.53613	6.72066	8.56703e-11	7.67648e-10	13.8477
SNAPC4	0.330976	5.66643	6.51114	2.96772e-10	2.41724e-09	12.6356
AHSG	0.330915	1.01246	3.11924	0.00198194	0.00443453	-2.4096
ATAD3A	0.330798	6.41474	5.2019	3.57367e-07	1.68358e-06	5.75376
PLEKHA7	0.330788	7.09167	4.55433	7.53849e-06	2.74945e-05	2.82727
NOL4L	0.33075	6.82604	7.66695	2.23954e-13	2.99938e-12	19.6666
ANKDD1B	0.33071	3.01914	4.92597	1.36229e-06	5.74473e-06	4.46609
SPRYD4	0.330622	5.04815	8.87261	5.60921e-17	1.24213e-15	27.8132
SELENBP1	0.330602	7.66921	3.36583	0.000858256	0.00208192	-1.63806
KBTBD11	0.330548	6.10101	4.17795	3.82002e-05	0.000121434	1.28274
TIGD1	0.330198	5.81919	6.43051	4.75134e-10	3.72207e-09	12.1769
TRAPPC6A	0.330072	7.13699	5.1106	5.59942e-07	2.54148e-06	5.32113
CLYBL	0.329926	4.09667	6.01004	5.15669e-09	3.41377e-08	9.85673
KLHL31	0.329843	2.78497	5.4272	1.14916e-07	5.94036e-07	6.84879
CHST5	0.329768	2.83812	3.73722	0.000221141	0.000606996	-0.373636
CYP2C19	0.329647	3.6612	3.43499	0.000672523	0.0016668	-1.41186
BCAT2	0.329547	6.42262	5.86492	1.14211e-08	7.10455e-08	9.08467
TBRG4	0.329314	7.31099	7.99033	2.60826e-14	3.94651e-13	21.7761
CHDH	0.329241	6.11959	3.76039	0.000202439	0.000560001	-0.290745
LEKR1	0.329178	2.62393	7.39844	1.27731e-12	1.52765e-11	17.9604
HEXIM2	0.329054	4.88334	6.92498	2.48317e-11	2.43829e-10	15.0572
CCDC107	0.328733	6.01428	4.18073	3.77607e-05	0.000120126	1.29371
ANKMY1	0.32817	5.20614	7.46478	8.3392e-13	1.02549e-11	18.3781
MROH7-TTC4	0.328156	2.72095	3.96146	9.23019e-05	0.000273481	0.448281
SRC	0.327883	8.10679	5.13329	5.01095e-07	2.28966e-06	5.42806
MAMSTR	0.32768	3.09681	5.44286	1.06056e-07	5.52432e-07	6.92633
CNNM4	0.327383	6.85775	5.14805	4.66079e-07	2.14406e-06	5.49783
SLC35A2	0.327261	7.43911	6.39334	5.89424e-10	4.52975e-09	11.9669
BOLA1	0.327159	5.97234	6.43239	4.69967e-10	3.68499e-09	12.1875
CCNB3	0.327082	2.54452	6.50009	3.16624e-10	2.56298e-09	12.5725
MRPL21	0.326905	6.66965	6.95015	2.12797e-11	2.11839e-10	15.2081
PPP1R13B	0.326638	6.1471	6.60578	1.69903e-10	1.45349e-09	13.1795
PPARGC1A	0.326624	4.87439	2.8445	0.00474122	0.00974429	-3.20411
WWC1	0.326371	7.14007	5.45785	9.82028e-08	5.1659e-07	7.00069
ALKBH6	0.326247	3.98026	6.36783	6.83018e-10	5.18276e-09	11.8233
PAXX	0.326168	7.2029	5.4151	1.22252e-07	6.28521e-07	6.78899
GREB1L	0.32609	4.4547	3.50534	0.000522643	0.00132606	-1.17741
BRI3BP	0.32608	5.70003	5.45392	1.00204e-07	5.25814e-07	6.98119
SH3RF1	0.326028	7.82466	4.906	1.49749e-06	6.26823e-06	4.37522
ZNF628	0.325952	3.96694	4.94798	1.22692e-06	5.21133e-06	4.56664
PMVK	0.325829	7.80402	6.35679	7.27933e-10	5.49476e-09	11.7613
ENDOV	0.325825	5.09198	6.32444	8.76749e-10	6.53412e-09	11.5801
NOSTRIN	0.325649	6.19529	3.6589	0.000297155	0.000793113	-0.650389
FSIP2	0.325555	4.82489	4.17058	3.93894e-05	0.000124841	1.25367
XRCC3	0.325426	5.50024	5.78531	1.75569e-08	1.05286e-07	8.66758
SMIM2	0.325383	1.57232	3.6198	0.000343738	0.000905226	-0.786556
SPATA17	0.325363	3.08268	4.35319	1.81963e-05	6.14993e-05	1.9872
C19orf67	0.325335	1.33316	5.45806	9.80951e-08	5.16183e-07	7.00175
RAD51AP1	0.324894	4.94233	3.89079	0.000122102	0.000352623	0.184551
TTLL2	0.324862	1.70142	4.08936	5.50601e-05	0.000170318	0.936445
FBXW9	0.324806	5.4129	5.83059	1.37551e-08	8.41185e-08	8.90426
OCEL1	0.32464	5.99469	5.92805	8.0956e-09	5.17018e-08	9.4187
HINT2	0.324601	6.19342	5.15635	4.47444e-07	2.0656e-06	5.53714
GPR89A	0.324533	5.10538	7.87997	5.46754e-14	7.97482e-13	21.0497
PLXNA3	0.324525	6.71989	5.12645	5.18169e-07	2.3645e-06	5.39579
ZNHIT1	0.324339	7.54907	6.62927	1.47808e-10	1.27862e-09	13.3154
CFAP43	0.324167	3.36979	4.30385	2.24774e-05	7.45754e-05	1.78624
TMEM223	0.324119	6.12711	7.80548	8.97746e-14	1.27127e-12	20.5631
BORA	0.324102	4.8648	5.73507	2.29773e-08	1.3517e-07	8.40673
ABCB6	0.323729	4.88542	6.2115	1.66967e-09	1.19562e-08	10.9531
ZNF69	0.323624	5.36263	4.72228	3.52549e-06	1.36984e-05	3.55412
PUS1	0.323604	5.64941	5.6433	3.73899e-08	2.11681e-07	7.935
SLC26A8	0.323591	2.07919	5.46467	9.4816e-08	4.99856e-07	7.03462
HDDC3	0.323471	5.60797	7.09599	8.63513e-12	9.08773e-11	16.0899
FLNB	0.323409	10.4581	3.29454	0.00109893	0.00259902	-1.86674
LAMA5	0.322979	7.9208	3.6944	0.000260077	0.000703759	-0.525627
C12orf73	0.322668	4.51247	6.37285	6.63536e-10	5.05363e-09	11.8515
ZNRF1	0.322653	5.77385	7.60231	3.41821e-13	4.45467e-12	19.2521
RTBDN	0.322621	2.42815	2.95196	0.00339648	0.00721237	-2.90159
LRWD1	0.32226	5.58098	6.20355	1.74654e-09	1.24752e-08	10.9093
DEDD2	0.322255	7.56266	5.50585	7.6667e-08	4.10928e-07	7.24006
MIEN1	0.322242	7.37496	5.16727	4.24036e-07	1.96715e-06	5.58891
ARHGAP27	0.321868	7.17233	4.20281	3.44366e-05	0.000110419	1.38111
MBLAC1	0.321794	3.36333	4.7323	3.36695e-06	1.31244e-05	3.59818
MYORG	0.321644	6.9584	4.19874	3.50276e-05	0.000112187	1.36497
TLX2	0.321615	1.11366	3.57897	0.000399651	0.00103721	-0.927303
HES5	0.321556	1.26763	3.7383	0.000220233	0.0006047	-0.369778
DHCR7	0.321523	7.09644	4.55144	7.63611e-06	2.78029e-05	2.81499
C15orf65	0.321113	4.0135	4.5248	8.5969e-06	3.10156e-05	2.70183
CFAP70	0.321048	4.01969	4.3773	1.64001e-05	5.59962e-05	2.08612
GAK	0.320985	7.51968	5.88006	1.05188e-08	6.58182e-08	9.16453
CCNE2	0.320892	4.09152	5.52147	7.07063e-08	3.81626e-07	7.31834
FAM86B1	0.320869	3.62358	5.58353	5.11777e-08	2.82526e-07	7.63109
TIGD5	0.320798	5.10684	5.73497	2.29897e-08	1.35196e-07	8.40621
CCDC96	0.320766	3.48923	4.2166	3.25045e-05	0.000104877	1.43589
ALDOA	0.320605	11.2569	5.21232	3.39373e-07	1.60325e-06	5.80356
TREH	0.320554	2.75409	2.92557	0.0036897	0.00777774	-2.97686
ZNF620	0.320258	4.24586	7.52529	5.64016e-13	7.15503e-12	18.7612
SLC35E4	0.320172	4.59513	4.57857	6.76453e-06	2.4896e-05	2.93075
LHFPL5	0.320056	1.85533	3.90739	0.00011438	0.000332523	0.246093
ZHX1-C8orf76	0.319943	3.52611	5.53905	6.45389e-08	3.509e-07	7.40663
PTPRF	0.319932	9.48215	4.48491	1.02549e-05	3.6433e-05	2.53356
PPP1R13L	0.319932	6.92777	3.27069	0.00119256	0.00279865	-1.94224
NCAPH	0.319781	5.01693	3.75446	0.000207077	0.000571807	-0.311999
STOX1	0.319732	3.13272	3.65067	0.000306439	0.000815843	-0.679169
RAB11FIP4	0.319582	6.35745	5.74238	2.20977e-08	1.3022e-07	8.44456
SPATA2	0.319559	5.81288	8.29093	3.36202e-15	5.735e-14	23.7881
DOHH	0.319447	5.67935	5.24179	2.93127e-07	1.40231e-06	5.94481
TMEM53	0.319341	5.387	5.82081	1.45013e-08	8.83e-08	8.85302
UBALD1	0.319329	5.60544	5.06357	7.03984e-07	3.13093e-06	5.10078
MRPS17	0.319297	5.58429	7.32299	2.0679e-12	2.39733e-11	17.4886
FDXR	0.319176	5.3198	4.50896	9.22181e-06	3.30667e-05	2.63486
UNC13C	0.319142	2.11243	2.88342	0.00420639	0.00875192	-3.09576
FAM151A	0.319066	1.98253	3.28579	0.00113246	0.00267051	-1.8945
ISYNA1	0.319016	6.83916	3.48567	0.000561039	0.00141546	-1.24338
SERPIND1	0.318855	3.16535	2.99817	0.00293378	0.00632379	-2.76823
SMPD2	0.318798	6.05575	6.31433	9.29113e-10	6.89799e-09	11.5236
TMEM68	0.318745	5.67566	6.80161	5.26114e-11	4.87875e-10	14.3237
ZNF695	0.318632	2.63103	4.30115	2.27368e-05	7.53626e-05	1.77533
ZNF823	0.31856	5.5656	7.49453	6.88248e-13	8.61932e-12	18.5662
MARCKSL1	0.318477	9.68773	4.06027	6.19986e-05	0.000189779	0.82417
MYOM1	0.318052	6.08091	3.05967	0.00240749	0.00528449	-2.58771
KIF23	0.317981	5.36902	3.6027	0.000366198	0.00095888	-0.845688
DUS4L	0.317878	4.67056	6.91377	2.65954e-11	2.60246e-10	14.9902
ENOSF1	0.317789	6.47578	5.57467	5.36036e-08	2.95123e-07	7.58627
DYRK1B	0.317709	6.00104	4.48649	1.01835e-05	3.62095e-05	2.54022
UQCRHL	0.317613	1.90389	4.02913	7.03424e-05	0.000212905	0.704813
TRPT1	0.317604	6.63486	7.61581	3.12999e-13	4.11692e-12	19.3384
TRIM46	0.317463	3.83998	3.53417	0.000470776	0.00120507	-1.08005
PTGR2	0.317383	4.99106	6.73871	7.68732e-11	6.96157e-10	13.9535
KHDC4	0.317343	7.47965	5.82434	1.42277e-08	8.67587e-08	8.8715
TRIM45	0.317313	4.74897	6.6094	1.66297e-10	1.42675e-09	13.2004
NAPEPLD	0.317307	6.46473	6.38306	6.25507e-10	4.79189e-09	11.909
TRIM2	0.317195	7.68304	4.19693	3.52935e-05	0.000112932	1.35779
OAZ3	0.317118	2.55005	5.63159	3.97708e-08	2.24116e-07	7.87522
BRAT1	0.316989	6.90437	5.50795	7.5839e-08	4.07004e-07	7.25056
KHDC1	0.316964	3.70733	6.43473	4.63627e-10	3.64031e-09	12.2008
COX6A1	0.31677	9.27331	6.60015	1.75667e-10	1.49678e-09	13.147
MVD	0.316437	6.83533	4.64792	4.94912e-06	1.87335e-05	3.22948
RELL2	0.316333	3.99006	4.88863	1.62553e-06	6.751e-06	4.29645
ADM2	0.316261	5.42268	3.15192	0.00177906	0.00402454	-2.3105
NEURL2	0.31618	2.88691	5.75161	2.10336e-08	1.24554e-07	8.4924
OXSM	0.316107	5.50521	8.66107	2.53309e-16	5.11035e-15	26.33
HPRT1	0.316018	7.13701	7.42555	1.07337e-12	1.29835e-11	18.1308
SLC37A4	0.315848	6.85665	4.38181	1.60832e-05	5.51243e-05	2.10469
SLC25A47	0.315785	0.666986	4.10432	5.17861e-05	0.000160863	0.994466
NLRP9	0.315661	1.65077	4.20854	3.36216e-05	0.00010805	1.40383
SPAG1	0.315639	5.81234	4.58798	6.48501e-06	2.40075e-05	2.97108
INO80C	0.315636	4.79053	5.3741	1.50647e-07	7.61838e-07	6.58723
NPHS2	0.315614	0.716763	3.55965	0.000428997	0.00110494	-0.993412
TSNARE1	0.315403	5.94052	5.959	6.83196e-09	4.43139e-08	9.58349
C4orf36	0.315381	2.65314	4.9415	1.2654e-06	5.36274e-06	4.53697
THAP10	0.315325	3.79457	6.05854	3.9407e-09	2.65634e-08	10.1181
MBOAT2	0.315262	7.7526	3.61388	0.00035137	0.000923466	-0.807076
ASNS	0.314877	6.68591	4.68799	4.12454e-06	1.58236e-05	3.40387
EPHB4	0.314513	8.21301	4.28072	2.48009e-05	8.17263e-05	1.69275
PPP1R37	0.314432	6.76367	5.60232	4.63808e-08	2.58199e-07	7.72636
CLCNKA	0.314351	1.67189	2.95103	0.00340645	0.00722771	-2.90426
WDR18	0.314068	6.73368	4.7403	3.24523e-06	1.27434e-05	3.63345
COX5A	0.313751	8.46408	6.9782	1.79082e-11	1.80537e-10	15.3767
SIVA1	0.313632	6.96443	5.25942	2.68445e-07	1.29296e-06	6.02964
MID1IP1	0.313083	7.57818	5.74078	2.22871e-08	1.312e-07	8.43629
LZTS3	0.313059	6.39996	3.97637	8.69654e-05	0.000258977	0.504477
EFHD2	0.312973	9.24879	4.4389	1.25489e-05	4.38321e-05	2.34107
CLUH	0.312831	7.36193	6.1599	2.23454e-09	1.56648e-08	10.6696
ANK3	0.312691	5.90036	4.92485	1.36953e-06	5.77381e-06	4.461
NELFA	0.312609	6.32197	7.05206	1.13457e-11	1.17872e-10	15.8229
DOK4	0.312536	7.9691	4.327	2.03609e-05	6.82529e-05	1.88028
MRPS34	0.312536	8.43389	6.55093	2.34902e-10	1.94403e-09	12.8636
LENEP	0.312154	1.06477	5.02933	8.30758e-07	3.64048e-06	4.94148
ZNF696	0.312091	4.89568	7.1455	6.33879e-12	6.8058e-11	16.3923
NDUFS7	0.312068	6.3234	4.32654	2.04012e-05	6.83425e-05	1.8784
KCTD1	0.312042	5.56437	4.69139	4.06113e-06	1.55909e-05	3.4187
EIF4EBP1	0.312014	7.95876	3.85077	0.000142808	0.000408053	0.0371148
EMX1	0.311993	1.21486	2.8737	0.00433455	0.00899106	-3.12295
RNPEPL1	0.311854	7.79134	5.49908	7.93994e-08	4.24104e-07	7.20619
HYPK	0.311738	4.56947	7.44453	9.50128e-13	1.15751e-11	18.2503
IQCC	0.311573	4.5875	7.03303	1.27659e-11	1.31741e-10	15.7076
ALG1L2	0.311156	2.06283	4.38172	1.60891e-05	5.51334e-05	2.10435
DHRS3	0.311076	9.01184	3.76277	0.000200603	0.000555553	-0.282191
COA6	0.310846	6.68777	5.93012	8.00455e-09	5.1178e-08	9.42968
TMEM205	0.3108	8.23922	5.79833	1.63693e-08	9.88262e-08	8.73549
P4HTM	0.310274	6.80881	4.97446	1.08127e-06	4.63371e-06	4.68807
ANKRD18B	0.310192	2.48907	3.60886	0.000357953	0.000939605	-0.824416
GTPBP3	0.309994	5.47106	6.55696	2.26703e-10	1.88812e-09	12.8982
PCBD2	0.309901	5.19309	8.57087	4.78635e-16	9.23966e-15	25.7042
PTCD1	0.309612	5.24072	6.54368	2.45149e-10	2.01999e-09	12.8219
MUTYH	0.309578	5.67272	6.49752	3.2144e-10	2.59825e-09	12.5578
DNPH1	0.309326	7.49074	4.75673	3.00855e-06	1.18661e-05	3.706
PICK1	0.309324	6.51235	6.49271	3.30618e-10	2.66737e-09	12.5303
ISCA2	0.309097	6.03724	6.88227	3.22362e-11	3.09916e-10	14.8022
PUSL1	0.308875	5.516	4.92979	1.3378e-06	5.64705e-06	4.48352
SLC22A23	0.308827	6.1211	4.31034	2.18631e-05	7.27642e-05	1.81259
FAM207A	0.308562	5.83413	4.82714	2.16952e-06	8.80807e-06	4.01944
CLMN	0.308481	7.3772	4.65859	4.71526e-06	1.79081e-05	3.27579
ERBB2	0.308062	8.74308	3.31311	0.00103084	0.00245538	-1.80763
STXBP6	0.30775	5.54083	2.83976	0.00481041	0.00986761	-3.21721
CENPI	0.307685	4.16908	4.17008	3.94715e-05	0.000125078	1.2517
B3GNT4	0.307648	3.19112	5.41114	1.24753e-07	6.40023e-07	6.76942
MCAT	0.307488	6.03971	6.81805	4.76304e-11	4.44838e-10	14.4209
DNAAF5	0.307383	6.22417	7.72812	1.49768e-13	2.05411e-12	20.0612
ZNF497	0.307288	3.61398	5.50897	7.54387e-08	4.05495e-07	7.25568
ITPRID1	0.307097	2.41021	3.09164	0.00216967	0.00480652	-2.49253
MBD6	0.307097	6.98323	5.42261	1.17647e-07	6.06863e-07	6.82609
BAG1	0.307046	7.51485	5.30959	2.08747e-07	1.02784e-06	6.27232
CAPRIN2	0.306858	6.85381	3.5734	0.000407917	0.00105625	-0.946408
HSD17B7	0.306835	5.39765	5.88025	1.05081e-08	6.57751e-08	9.16552
EXPH5	0.306705	5.91117	5.02761	8.3769e-07	3.66519e-06	4.93349
SETD6	0.30665	5.55373	8.37098	1.9331e-15	3.41039e-14	24.3319
PHETA1	0.306388	6.92496	5.0492	7.54724e-07	3.33739e-06	5.03381
CCDC196	0.30634	0.81187	3.94796	9.73995e-05	0.000287283	0.397576
DSG2	0.306202	9.55234	3.14196	0.00183877	0.00414636	-2.3408
COQ3	0.3062	4.86327	5.75899	2.02187e-08	1.20063e-07	8.53071
MRGBP	0.305671	6.72596	6.44271	4.42602e-10	3.48487e-09	12.246
PANK1	0.305636	4.47693	5.42639	1.15394e-07	5.96166e-07	6.84478
RPP25	0.305447	6.34996	4.50795	9.26313e-06	3.31939e-05	2.6306
KCNMB3	0.305149	3.89624	6.88183	3.23241e-11	3.10585e-10	14.7996
BPNT1	0.305025	7.45505	6.00665	5.25439e-09	3.47439e-08	9.8385
BICRA	0.304819	4.54488	5.16354	4.319e-07	1.99982e-06	5.5712
IFRD2	0.304817	7.22359	6.42672	4.85712e-10	3.78922e-09	12.1554
THOP1	0.304809	5.94324	5.32202	1.96074e-07	9.72194e-07	6.33277
VRTN	0.304805	0.842291	3.0349	0.00260805	0.00567927	-2.66084
TTLL12	0.304758	7.82118	4.56036	7.3383e-06	2.68219e-05	2.85298
CORO2A	0.304577	7.46294	2.9421	0.00350344	0.00741728	-2.92979
MYO15B	0.304509	7.21406	3.11694	0.00199699	0.00446467	-2.41653
ATP6V1C2	0.30445	3.95625	3.78841	0.00018181	0.000508142	-0.189848
TIMM17B	0.304257	7.18974	6.86645	3.54993e-11	3.38038e-10	14.708
CCNE1	0.304232	4.64718	3.33426	0.000958049	0.00229907	-1.7399
MAP10	0.304203	4.73929	5.45727	9.84934e-08	5.17958e-07	6.99783
LANCL3	0.3042	2.84448	4.42168	1.35278e-05	4.701e-05	2.26949
RPP21	0.303962	5.71671	5.92485	8.23872e-09	5.25549e-08	9.40169
NEK8	0.303826	5.10246	6.33427	8.28615e-10	6.19168e-09	11.6351
ATP2A1	0.303822	2.31764	4.43135	1.29694e-05	4.52175e-05	2.30966
CYHR1	0.303707	6.54534	6.1184	2.82126e-09	1.94808e-08	10.4429
CCDC125	0.303531	5.78778	7.22699	3.79897e-12	4.19812e-11	16.8933
PRPF40B	0.303371	4.88378	6.48889	3.38087e-10	2.72504e-09	12.5085
MAGI1	0.303232	6.84612	5.11634	5.4445e-07	2.47447e-06	5.34814
TCF7L2	0.303229	7.07032	4.17777	3.82286e-05	0.000121501	1.28203
CMC1	0.303183	4.70538	7.12657	7.13546e-12	7.5988e-11	16.2765
TYSND1	0.302918	6.18143	6.42948	4.7798e-10	3.7392e-09	12.1711
KRTAP5-9	0.302904	1.1648	3.83017	0.00015472	0.000439507	-0.0382361
LCOR	0.302829	7.09559	6.53199	2.62594e-10	2.15019e-09	12.7549
ANKRD61	0.302825	3.30013	6.7669	6.48769e-11	5.93524e-10	14.1191
SPAG16	0.302702	5.78021	5.82504	1.41738e-08	8.64614e-08	8.87517
TMEM182	0.302654	4.47681	5.94108	7.53782e-09	4.84205e-08	9.48801
ZNF707	0.302637	4.92225	6.44662	4.32654e-10	3.41445e-09	12.2681
MYO10	0.302621	7.83029	5.26496	2.61112e-07	1.26014e-06	6.05636
CAPN10	0.302595	5.75524	6.02697	4.6954e-09	3.12665e-08	9.94778
COASY	0.302571	7.61925	7.52238	5.74747e-13	7.27286e-12	18.7428
FAM81A	0.302526	4.22647	3.86322	0.000136037	0.000390476	0.0828208
WDR24	0.302428	5.53307	5.77931	1.81316e-08	1.08464e-07	8.63634
IDNK	0.302388	4.93976	5.62834	4.04563e-08	2.27677e-07	7.85867
IGSF8	0.302261	7.74486	5.57407	5.37718e-08	2.95858e-07	7.58324
NME1-NME2	0.302249	3.35785	3.33047	0.000970707	0.00232551	-1.75204
NIPA1	0.302179	6.6558	5.45903	9.76058e-08	5.13767e-07	7.00659
DOT1L	0.302163	5.87961	5.78866	1.72429e-08	1.03585e-07	8.68507
FAM111B	0.302036	5.07452	3.48803	0.000556295	0.00140474	-1.23548
SDC4	0.301761	10.7348	3.41225	0.000728989	0.00179524	-1.48671
MDH2	0.301414	9.08409	7.99894	2.46124e-14	3.75075e-13	21.833
POLR2J3	0.301236	4.619	5.05588	7.3069e-07	3.24207e-06	5.06495
KLF16	0.301114	6.4576	5.29935	2.19772e-07	1.0762e-06	6.22265
ROMO1	0.301092	8.6304	6.00532	5.29292e-09	3.49472e-08	9.8314
GPAT3	0.301084	5.20091	3.4284	0.000688457	0.0017048	-1.43361
HYAL3	0.301043	3.94201	4.11332	4.99075e-05	0.000155397	1.02945
HPCA	0.301023	2.55416	3.4113	0.000731433	0.00180023	-1.48981
SPTBN5	0.300894	4.471	3.47146	0.000590414	0.00148275	-1.29085
MTHFD2L	0.300792	4.65404	7.27391	2.82393e-12	3.19963e-11	17.1836
MCOLN3	0.300625	3.70528	2.87519	0.00431469	0.00895532	-3.11879
CENPX	0.300576	6.86183	5.20892	3.45143e-07	1.6278e-06	5.78731
POLD4	0.300499	7.55628	4.67517	4.37289e-06	1.66823e-05	3.34791
RRP12	0.300488	6.56103	5.85637	1.19632e-08	7.41465e-08	9.03968
SELENOI	0.300273	7.11923	6.71134	9.05922e-11	8.08767e-10	13.7932
ZNF572	0.300208	4.18512	5.39587	1.34854e-07	6.87694e-07	6.69421
BNC1	-0.300214	1.66285	-2.89419	0.00406847	0.00848988	-3.06554
PLD3	-0.300289	9.44762	-4.53178	8.33459e-06	3.01412e-05	2.73142
GOPC	-0.300327	7.73244	-7.96192	3.1577e-14	4.72738e-13	21.5884
KRT36	-0.3005	0.794376	-4.41436	1.39653e-05	4.8392e-05	2.23917
RBFOX2	-0.300548	8.1103	-7.27734	2.76317e-12	3.14096e-11	17.2049
KCNN3	-0.300599	4.39034	-5.01186	9.03693e-07	3.92169e-06	4.86055
GBP4	-0.300884	7.39584	-3.17145	0.00166717	0.00379616	-2.25082
LURAP1	-0.300934	3.34733	-5.66445	3.34384e-08	1.90899e-07	8.04318
GRB2	-0.301279	8.8016	-8.81577	8.42782e-17	1.83524e-15	27.4125
CCSER2	-0.301419	7.32292	-8.93426	3.60064e-17	8.15395e-16	28.2494
MAP4	-0.301717	8.97806	-8.22027	5.46469e-15	9.06712e-14	23.3108
APOBEC3C	-0.301862	6.79318	-4.3214	2.08546e-05	6.97216e-05	1.85749
BTN3A2	-0.30195	7.4444	-4.42306	1.34463e-05	4.67554e-05	2.27525
PNRC1	-0.302196	8.83259	-5.87165	1.1011e-08	6.87207e-08	9.12016
TBXAS1	-0.302207	6.69977	-3.9084	0.000113922	0.000331304	0.249873
CD68	-0.30222	6.47361	-4.52946	8.42071e-06	3.04251e-05	2.7216
IGF2R	-0.302235	8.69819	-6.65149	1.2951e-10	1.1301e-09	13.4444
BMPER	-0.302306	2.3514	-3.77707	0.000189911	0.000528576	-0.230781
IL18BP	-0.302354	5.54727	-5.10018	5.89148e-07	2.65984e-06	5.27218
PKIA	-0.30253	5.35968	-3.2578	0.00124617	0.00291481	-1.98282
RNF166	-0.302692	5.96361	-5.71273	2.58824e-08	1.50799e-07	8.29134
CCDC88A	-0.302692	6.93575	-5.45474	9.97832e-08	5.24093e-07	6.98526
ZHX3	-0.302832	6.57252	-6.14449	2.43694e-09	1.69718e-08	10.5853
ASAH1	-0.302869	9.37703	-6.04883	4.15919e-09	2.78925e-08	10.0656
ICAM2	-0.303024	5.91809	-4.42381	1.34025e-05	4.66128e-05	2.27836
FAM124B	-0.303379	3.62342	-5.14597	4.70876e-07	2.16321e-06	5.48797
NOS3	-0.303504	5.48266	-4.88855	1.62614e-06	6.75189e-06	4.29609
TMEM236	-0.303604	4.10164	-3.92385	0.000107178	0.000313353	0.307376
AFAP1	-0.303954	7.57485	-5.38862	1.39925e-07	7.11849e-07	6.65855
CRHBP	-0.304641	1.96186	-3.95186	9.59024e-05	0.000283162	0.412185
MOB3A	-0.304927	7.16137	-6.76773	6.45545e-11	5.90893e-10	14.124
TXNDC15	-0.304976	7.81817	-7.69145	1.90668e-13	2.58176e-12	19.8244
RAB7B	-0.305316	5.6988	-3.67406	0.000280755	0.000754671	-0.597262
SLC2A9	-0.305352	4.21373	-6.56218	2.19843e-10	1.83548e-09	12.9282
GJC1	-0.305512	5.24348	-5.10006	5.89499e-07	2.66072e-06	5.2716
KLF10	-0.305658	8.34789	-5.05433	7.36202e-07	3.26397e-06	5.05772
HLA-E	-0.305827	11.7627	-5.43963	1.07832e-07	5.60309e-07	6.91028
CARMIL2	-0.305891	3.65864	-3.00163	0.00290152	0.0062638	-2.75815
RBPMS2	-0.30601	3.13897	-3.13811	0.00186233	0.00419107	-2.35249
KCNMB4	-0.306072	4.74079	-3.70174	0.000252973	0.000686064	-0.499684
REV3L	-0.306254	6.68569	-5.98497	5.9222e-09	3.89026e-08	9.72228
LPAR6	-0.306811	7.33608	-4.94964	1.21729e-06	5.17431e-06	4.57421
GADD45A	-0.306848	7.57822	-4.61984	5.61907e-06	2.10678e-05	3.10807
CXCR3	-0.306973	3.97835	-3.04361	0.00253588	0.00553486	-2.6352
TRPC3	-0.307023	2.54158	-6.30014	1.00784e-09	7.41686e-09	11.4444
CAVIN4	-0.307243	3.24223	-3.92043	0.000108637	0.000317291	0.294635
STAT5B	-0.307305	7.99407	-7.11484	7.67763e-12	8.14049e-11	16.2049
CBX6	-0.307552	7.51845	-4.01069	7.57749e-05	0.000227807	0.634529
NEK1	-0.307577	6.03271	-7.01872	1.39473e-11	1.43065e-10	15.6211
HSF5	-0.307621	1.45255	-4.45234	1.18321e-05	4.15503e-05	2.39714
HERC1	-0.307821	7.75124	-7.31097	2.23214e-12	2.5737e-11	17.4138
KCNS2	-0.307821	2.81671	-6.22755	1.52442e-09	1.09949e-08	11.0417
TMOD2	-0.307971	6.00123	-5.50305	7.77847e-08	4.16263e-07	7.22606
EVA1A	-0.308127	5.62089	-3.38424	0.00080463	0.00196219	-1.57827
MYH8	-0.308279	1.28873	-4.76678	2.87195e-06	1.13695e-05	3.75053
STAT1	-0.308351	9.65138	-3.65647	0.000299869	0.000799604	-0.658895
IFI30	-0.308502	6.29321	-4.31476	2.14543e-05	7.15018e-05	1.83053
SLC19A2	-0.308538	6.98483	-4.05241	6.40104e-05	0.000195444	0.793975
CHST1	-0.308552	4.77162	-3.97156	8.86563e-05	0.000263367	0.486304
ITPRIPL2	-0.308582	8.11335	-5.74325	2.19953e-08	1.29662e-07	8.44907
PARD3B	-0.309034	6.52635	-5.6383	3.83897e-08	2.16836e-07	7.90945
ZYX	-0.309115	9.17405	-5.06913	6.85249e-07	3.05479e-06	5.12674
SLFN12	-0.30923	5.37434	-5.7482	2.14211e-08	1.2654e-07	8.47471
ETV1	-0.309372	6.62043	-4.0234	7.19897e-05	0.000217465	0.68294
MEI1	-0.309586	3.80661	-3.8235	0.000158774	0.000450196	-0.0625475
VCL	-0.309636	9.41285	-5.57073	5.472e-08	3.00395e-07	7.56632
ILDR2	-0.309641	4.41626	-4.31864	2.11018e-05	7.04549e-05	1.84628
NFIX	-0.31007	7.30478	-4.91381	1.44314e-06	6.05864e-06	4.41072
RBP5	-0.310211	5.18926	-3.43871	0.000663675	0.00164751	-1.39956
UHRF1BP1L	-0.310409	6.43313	-6.83715	4.24214e-11	4.00589e-10	14.534
CSRNP1	-0.310414	7.85178	-4.02868	7.0471e-05	0.000213256	0.703086
PGF	-0.31046	5.52759	-4.18156	3.76304e-05	0.000119757	1.29699
HOXA7	-0.310479	1.73994	-3.14255	0.00183516	0.00413932	-2.339
KCNT2	-0.311583	4.11081	-5.31159	2.06656e-07	1.01908e-06	6.28203
IL1RL1	-0.311636	4.64502	-3.35301	0.000897559	0.00216706	-1.67953
IL18R1	-0.311682	5.23524	-4.35973	1.76911e-05	5.99466e-05	2.01399
STEAP4	-0.311839	6.3118	-3.03744	0.0025868	0.0056377	-2.65337
RNASE3	-0.311965	1.31382	-4.4422	1.23691e-05	4.32574e-05	2.35482
TCEAL4	-0.312019	8.31964	-6.69801	9.81164e-11	8.70003e-10	13.7153
[truncated: 2,245 more rows]
