# Supplementary material for: Machine learning algorithm integrates bulk and single-cell transcriptome sequencing to reveal immune-related personalized therapy prediction features for pancreatic cancer
Source: Aging (Albany NY). 2023 Dec 12;15(23):14109–40. doi: 10.18632/aging.205293 (PMC10756117; doi:10.18632/aging.205293)
Supplement: Supplementary Table 3 [file aging-15-205293-s004.xlsx]

## Sheet: Table S3
Supplementary Table 3. Differential genes between pancreatic cancer and normal pancreatic samples.
	logFC	AveExpr	t	P.Value	adj.P.Val	B
TMPRSS4	9.91524	2.10734	45.6676	2.85567e-145	1.91291e-143	321.837
CEACAM5	9.90902	2.68451	24.4402	3.16103e-76	2.94007e-75	162.961
CST1	9.53594	-0.61595	27.9602	2.62252e-89	3.65881e-88	193.012
MSLN	9.00141	2.52829	29.3082	3.78493e-94	6.30607e-93	204.212
KLK6	8.89568	-0.292222	23.0053	9.94764e-71	7.77992e-70	150.24
S100P	8.75143	2.29578	28.9343	8.14606e-93	1.28913e-91	201.138
TFF1	8.61651	2.12427	19.6698	1.14383e-57	6.12802e-57	120.23
MMP12	8.25922	-1.51305	37.1829	1.82922e-120	6.55303e-119	264.761
SLC6A14	8.20786	0.430184	27.2022	1.52403e-86	1.9471e-85	186.668
COL10A1	8.17535	2.31686	32.5035	3.13093e-105	7.39627e-104	229.719
ONECUT3	8.07649	-1.39365	20.4089	1.3749e-60	7.98251e-60	126.901
COL17A1	7.81501	2.72227	25.7182	4.78689e-81	5.17874e-80	174.051
MUC5AC	7.80218	2.42844	16.6298	1.30194e-45	5.10543e-45	92.5094
GALNT5	7.75121	0.942161	33.3387	4.90476e-108	1.24594e-106	236.16
MUCL3	7.74292	1.78849	15.4518	5.71007e-41	2.00411e-40	81.8212
UGT1A10	7.60707	-1.51482	24.2831	1.25165e-75	1.1435e-74	161.537
CCL18	7.53698	-0.212163	26.1776	9.25802e-83	1.06085e-81	177.954
TNS4	7.45671	1.5238	24.826	1.08851e-77	1.06831e-76	166.299
IGFL2	7.4217	-1.43104	27.1818	1.81026e-86	2.30826e-85	186.497
CTSE	7.41837	4.90662	34.4085	1.42259e-111	4.05624e-110	244.272
SERPINB5	7.41311	1.12805	30.0816	6.9919e-97	1.26048e-95	210.482
MUC17	7.40424	-0.413453	14.1299	7.92133e-36	2.42893e-35	69.9776
CEACAM6	7.39242	5.99191	38.6633	4.80833e-125	2.00964e-123	275.266
MMP1	7.3354	2.44115	19.9052	1.34047e-58	7.37955e-58	122.379
AOC1	7.32343	1.73245	30.3503	7.98742e-98	1.4837e-96	212.659
MMP11	7.29276	4.37286	34.2251	5.69014e-111	1.5832e-109	242.897
KLK7	7.26024	0.206056	17.3099	2.6309e-48	1.10501e-47	98.6608
KRT17	7.22003	4.18937	28.1018	8.04824e-90	1.14407e-88	194.196
FAM83A	7.14216	-0.0024804	18.8775	1.57777e-54	7.74045e-54	112.972
DUOXA2	7.09831	0.57529	18.115	1.67761e-51	7.65609e-51	106.014
TRIM15	7.09677	-0.532559	27.7819	1.16481e-88	1.59549e-87	191.543
LRRC15	7.0884	-0.0156955	23.6375	3.67113e-73	3.09381e-72	155.859
PADI1	6.97942	0.220255	15.575	1.87747e-41	6.64796e-41	82.9074
CXCL5	6.90123	1.64147	18.1789	9.3494e-52	4.2888e-51	106.616
FGF19	6.83444	-1.83884	22.5763	4.5476e-69	3.3899e-68	146.461
COL1A1	6.82123	10.067	37.6972	4.55412e-122	1.71967e-120	268.432
PSCA	6.81538	1.85336	13.7431	2.41919e-34	7.16091e-34	66.6037
LEMD1	6.80234	-1.34752	28.4608	4.07304e-91	6.04008e-90	197.209
PLPP4	6.78017	-0.825565	29.7094	1.43237e-95	2.49042e-94	207.46
VSIG1	6.76161	0.453215	15.9841	4.61623e-43	1.70108e-42	86.6091
CST2	6.73497	-0.893063	29.2573	5.73834e-94	9.47189e-93	203.771
KLK10	6.68349	2.11274	22.2597	7.71462e-68	5.51729e-67	143.636
NMU	6.55261	-1.6243	26.4467	9.27915e-84	1.0914e-82	180.277
CLDN18	6.52684	2.98149	13.9785	3.02896e-35	9.16559e-35	68.6533
EPS8L3	6.47084	2.26624	23.9778	1.8269e-74	1.61182e-73	158.886
WNT7A	6.46897	-0.771558	20.4677	8.06363e-61	4.71101e-60	127.462
GJB3	6.45533	1.37617	31.8544	5.03331e-103	1.10869e-101	224.629
MISP	6.43807	3.07629	39.3155	5.00766e-127	2.18151e-125	279.871
GABRP	6.42773	2.3021	17.1471	1.16351e-47	4.81555e-47	97.2084
TFF2	6.42222	2.22157	14.9689	4.41855e-39	1.47084e-38	77.4889
WNT2	6.41936	-0.517624	28.7402	4.03597e-92	6.23567e-91	199.519
COL11A1	6.40133	2.63709	20.0209	4.67461e-59	2.60351e-58	123.413
FER1L6	6.39202	-1.17588	16.7748	3.47459e-46	1.38417e-45	93.8072
MUC16	6.32025	0.629172	13.344	8.02626e-33	2.27758e-32	63.0929
FOXL1	6.31219	0.693792	26.064	2.44932e-82	2.77732e-81	176.993
SFN	6.30917	3.19017	36.5291	2.09362e-118	7.15931e-117	260.023
STRA6	6.27518	1.05957	28.5718	1.62337e-91	2.43692e-90	198.129
POSTN	6.23481	4.78136	36.6706	7.47131e-119	2.59571e-117	260.999
KRT16	6.23265	1.48776	17.6358	1.34e-49	5.82103e-49	101.657
IHH	6.22796	-0.91254	19.8675	1.88837e-58	1.03493e-57	122.016
COL3A1	6.22132	9.74954	35.5231	3.40541e-115	1.08133e-113	252.6
BPIFB1	6.20042	-1.42499	17.0472	2.89746e-47	1.18939e-46	96.2966
FIBCD1	6.15782	-2.03228	22.8579	3.69242e-70	2.83231e-69	148.991
GCNT3	6.14624	3.34056	28.8903	1.17019e-92	1.8444e-91	200.73
HOXB9	6.14325	-2.00437	22.5693	4.83962e-69	3.60346e-68	146.418
DUOX2	6.14005	3.5436	21.1786	1.29058e-63	8.19602e-63	133.844
DHRS9	6.11406	0.598398	15.9711	5.19335e-43	1.91159e-42	86.4974
MMP9	6.10609	1.66565	25.6586	7.99882e-81	8.59181e-80	173.52
SDR16C5	6.09307	0.955179	21.222	8.72153e-64	5.56584e-63	134.289
KCNN4	6.0912	2.81821	33.4375	2.29824e-108	5.88397e-107	236.914
GJB4	6.08693	-0.799727	25.7834	2.7296e-81	2.97111e-80	174.591
COL1A2	6.08091	9.63301	36.7122	5.52432e-119	1.9227e-117	261.326
RFLNA	6.08005	1.0814	25.2516	2.6962e-79	2.75249e-78	169.994
HLA-DQB2	6.07322	0.379434	26.809	4.25415e-85	5.19097e-84	183.349
S100A6	6.07083	8.31815	46.7243	3.95744e-148	2.80462e-146	328.404
CDHR2	6.04126	1.392	19.2209	6.85664e-56	3.49898e-55	116.127
B3GNT6	6.01794	-2.63844	20.129	1.74903e-59	9.85624e-59	124.453
INHBA	6.00666	2.82966	30.6714	6.05465e-99	1.16679e-97	215.223
MMP13	5.99862	-2.96687	30.5292	1.89539e-98	3.58895e-97	214.14
C19orf33	5.98742	2.78083	30.938	7.17294e-100	1.42874e-98	217.354
CYP2S1	5.97128	2.18985	22.9484	1.64997e-70	1.28069e-69	149.773
ADGRF1	5.95598	1.14689	23.3058	6.90743e-72	5.57842e-71	152.94
CCL24	5.94214	-2.31499	27.2875	7.41891e-87	9.60383e-86	187.441
APOBEC1	5.92968	-2.76211	27.2908	7.21938e-87	9.35173e-86	187.481
LAMC2	5.92722	5.80541	45.8236	1.07325e-145	7.21399e-144	322.787
EPYC	5.90936	-3.00984	20.8826	1.876e-62	1.15501e-61	131.307
LAMP5	5.89937	1.09363	25.8132	2.112e-81	2.31693e-80	174.844
LAMB3	5.88083	5.57626	49.1861	1.31775e-154	1.06509e-152	343.308
FDCSP	5.87733	-1.69776	17.6181	1.57603e-49	6.83376e-49	101.525
KLK8	5.86857	-2.17004	18.3117	2.7766e-52	1.2928e-51	107.872
TRIM31	5.86631	1.01946	20.0937	2.41155e-59	1.35429e-58	124.069
HTR1D	5.86536	-1.36143	28.2025	3.47965e-90	5.01932e-89	195.083
CCL22	5.8603	-0.736222	27.5683	6.98726e-88	9.32907e-87	189.771
PITX1	5.8357	0.751956	19.2086	7.66895e-56	3.90637e-55	116.008
GPR87	5.83151	-1.85526	20.8413	2.72567e-62	1.66815e-61	130.887
CCL17	5.82944	-2.37337	27.3262	5.35667e-87	6.94804e-86	187.772
CAPN9	5.82273	-0.641187	17.6459	1.22179e-49	5.31782e-49	101.75
KRT19	5.81052	7.64938	40.2451	8.1319e-130	3.90811e-128	286.208
WNT10A	5.80541	-0.373821	23.5555	7.57386e-73	6.31747e-72	155.152
ERN2	5.78882	2.47883	20.7351	7.13699e-62	4.31262e-61	129.879
PLAAT2	5.77924	-2.10897	26.5108	5.376e-84	6.37687e-83	180.855
ADGRF4	5.75821	-1.03324	30.6143	9.56833e-99	1.83307e-97	214.788
PI3	5.74615	0.65695	18.1398	1.33733e-51	6.11746e-51	106.251
CILP2	5.73587	-0.188529	25.934	7.4756e-82	8.36036e-81	175.884
CRYBG2	5.72807	0.73491	24.6045	7.50989e-77	7.12038e-76	164.365
SLC9A2	5.71103	-1.17912	22.1455	2.14558e-67	1.51946e-66	142.618
UBE2C	5.70362	0.577385	26.4915	6.3353e-84	7.483e-83	180.651
NEK2	5.63359	-0.602089	28.3908	7.27646e-91	1.07013e-89	196.638
FN1	5.60358	9.05664	30.278	1.43127e-97	2.62624e-96	211.975
HOXA13	5.59931	-2.64598	18.5166	4.2661e-53	2.01899e-52	109.774
DLGAP5	5.59608	-0.383865	30.7514	3.18997e-99	6.22092e-98	215.879
BIRC7	5.59334	-2.29993	26.446	9.33899e-84	1.09778e-82	180.311
TRIM29	5.58438	3.60743	25.8321	1.79604e-81	1.97696e-80	174.923
STYK1	5.5837	-0.122708	28.4566	4.21669e-91	6.24837e-90	197.179
CD1A	5.57685	-2.59583	30.9111	8.89449e-100	1.76626e-98	217.195
C11orf86	5.575	-3.05932	25.8251	1.90732e-81	2.09591e-80	175.021
GPRC5A	5.57424	5.81138	42.6068	1.02753e-136	5.82565e-135	302.087
CLRN3	5.5683	-0.772628	21.8081	4.43507e-66	3.03216e-65	139.585
VSIG2	5.5659	2.5594	23.8331	6.53488e-74	5.63839e-73	157.577
TSPAN1	5.56428	4.5083	40.9077	8.86823e-132	4.48224e-130	290.755
ZBED2	5.55053	-2.14268	23.727	1.66611e-73	1.41754e-72	156.714
CEP55	5.53898	0.266425	30.4077	5.03455e-98	9.39655e-97	213.116
TNFSF11	5.51932	-0.996449	27.8429	6.98924e-89	9.62744e-88	192.082
CST4	5.51283	-3.33957	32.45	4.74983e-105	1.11265e-103	229.341
DKK1	5.5048	0.139621	17.5642	2.57892e-49	1.11232e-48	100.999
PLA2G2D	5.49519	-3.05796	26.2306	5.88031e-83	6.77378e-82	178.501
TCN1	5.48336	3.30662	20.8713	2.07719e-62	1.27647e-61	131.047
SULF1	5.43959	5.27762	39.7724	2.10527e-128	9.66645e-127	282.949
CYP2C18	5.37643	-0.107089	19.1428	1.39916e-55	7.07174e-55	115.416
NTM	5.37062	1.88634	27.2622	9.18965e-87	1.18725e-85	187.191
HLA-DQA2	5.36061	0.788173	16.4406	7.29128e-45	2.80301e-44	90.7649
EPHX4	5.35888	-1.87585	31.3922	1.93625e-101	4.04627e-100	221.008
NMUR2	5.3538	-3.11879	21.1819	1.25263e-63	7.96016e-63	134.032
CTHRC1	5.32243	3.38609	33.1377	2.30327e-107	5.72451e-106	234.564
SOX21	5.31875	-2.44049	19.3786	1.627e-56	8.4819e-56	117.636
ADAM12	5.30541	1.73728	20.9283	1.24011e-62	7.66644e-62	131.644
EFNA2	5.3019	-2.7353	26.9852	9.54675e-86	1.18863e-84	184.913
SHH	5.29325	0.516216	21.2848	4.94502e-64	3.18068e-63	134.861
CDH17	5.27494	1.18862	14.2755	2.17241e-36	6.76629e-36	71.2984
ABCA12	5.26901	-1.83565	27.3302	5.17958e-87	6.7228e-86	187.803
TM4SF5	5.22556	-0.156696	17.8152	2.59939e-50	1.15266e-49	103.298
GPA33	5.22526	-1.51212	23.3636	4.13922e-72	3.36645e-71	153.492
CDH3	5.21334	3.22021	32.4711	4.03068e-105	9.45326e-104	229.401
LCN2	5.21242	6.29251	25.5991	1.33574e-80	1.41995e-79	172.758
PLAC8	5.21231	1.81472	22.0061	7.48881e-67	5.23521e-66	141.351
ANXA13	5.2104	-0.2141	18.002	4.71456e-51	2.12579e-50	105.006
EGFL6	5.20829	-1.66531	30.5494	1.61036e-98	3.05812e-97	214.287
CEMIP	5.18569	2.50234	24.8239	1.10864e-77	1.08643e-76	166.249
TPX2	5.16535	1.57516	28.4897	3.20453e-91	4.77021e-90	197.456
ST8SIA2	5.15774	-2.75152	28.5931	1.36072e-91	2.04894e-90	198.37
NOX1	5.15369	-2.52662	29.1522	1.35898e-93	2.21146e-92	202.968
S100A2	5.14834	1.04747	13.4077	4.59871e-33	1.31507e-32	63.6632
OPN1SW	5.12139	-2.05576	37.4436	2.80294e-121	1.02862e-119	266.663
AGMO	5.11674	-1.59334	22.6711	1.95171e-69	1.4666e-68	147.344
NKAIN4	5.11631	-2.4634	27.7783	1.20092e-88	1.64152e-87	191.583
TOP2A	5.10647	2.30665	30.8762	1.17575e-99	2.323e-98	216.857
FAM3D	5.08609	1.05577	14.8673	1.10047e-38	3.62743e-38	76.5709
AGR2	5.08575	5.68558	31.0083	4.09573e-100	8.25901e-99	217.723
MATN3	5.08348	1.7195	20.9112	1.44822e-62	8.93317e-62	131.486
AKR1B10	5.07811	1.22369	14.2103	3.88043e-36	1.19945e-35	70.7221
CLIC3	5.06775	0.945418	17.384	1.33765e-48	5.65719e-48	99.3603
LRRC31	5.05594	-2.67239	21.2508	6.72176e-64	4.30228e-63	134.642
MMP10	5.03596	-0.981334	21.3391	3.02991e-64	1.95853e-63	135.381
KIF20A	5.02054	0.114444	29.0649	2.7828e-93	4.47997e-92	202.203
OASL	5.01482	1.30276	22.1518	2.02753e-67	1.4369e-66	142.663
PPP1R14D	5.01294	-1.0694	22.7454	1.00634e-69	7.63541e-69	147.991
CORO2A	5.0128	2.7728	37.9697	6.51643e-123	2.53402e-121	270.385
GJB2	5.00241	3.01962	28.6953	5.84549e-92	8.9747e-91	199.09
CGB5	4.99919	-3.53969	18.0315	3.59832e-51	1.62623e-50	105.406
MKI67	4.99043	2.58202	31.4276	1.46274e-101	3.07317e-100	221.228
DMBX1	4.97633	-3.31861	26.1124	1.61798e-82	1.84427e-81	177.507
CKAP2L	4.96982	-0.874719	30.0157	1.19199e-96	2.13903e-95	209.972
SERPINB7	4.96368	-1.90594	22.4724	1.14987e-68	8.465e-68	145.587
MTRNR2L1	4.95615	-3.42298	14.1607	6.0227e-36	1.8546e-35	70.4232
TNFAIP6	4.95127	-0.0702718	25.0407	1.68051e-78	1.68395e-77	168.177
CYP24A1	4.95069	-3.21644	20.8294	3.03714e-62	1.85529e-61	130.86
SOX11	4.94953	-2.75345	24.2845	1.23547e-75	1.1303e-74	161.65
IL2RG	4.94435	3.11065	32.3015	1.51334e-104	3.49068e-103	228.074
TINAG	4.92657	-3.48943	23.3309	5.53114e-72	4.48545e-71	153.278
NPSR1	4.9199	-3.51537	17.188	8.01129e-48	3.3291e-47	97.7113
HAPLN1	4.9154	-3.262	24.1508	3.99501e-75	3.59772e-74	160.497
KIF4A	4.91475	0.133298	29.7469	1.05524e-95	1.84125e-94	207.778
IL1RN	4.90278	2.47124	26.406	1.31321e-83	1.53903e-82	179.886
SCEL	4.89745	0.751784	16.3079	2.43907e-44	9.26195e-44	89.5652
ANLN	4.89544	1.44989	25.7358	4.11317e-81	4.45479e-80	174.183
COMP	4.89354	3.87645	25.0221	1.97537e-78	1.97234e-77	167.864
CSF2	4.89322	-3.49858	32.4305	5.52941e-105	1.29063e-103	229.196
SULT1E1	4.87274	-1.843	18.8714	1.66771e-54	8.1735e-54	113.005
PAEP	4.87181	-3.57665	22.8808	3.01167e-70	2.31831e-69	149.288
ADTRP	4.86633	-0.33542	22.4077	2.0517e-68	1.49743e-67	144.963
BCAS1	4.85754	2.67263	22.0386	5.59345e-67	3.92143e-66	141.58
TRIM10	4.8486	-2.37471	29.079	2.47892e-93	4.00724e-92	202.37
CCR4	4.8205	-1.84341	23.6373	3.6773e-73	3.09768e-72	155.935
IL2RA	4.81795	-0.258777	23.1666	2.37482e-71	1.89753e-70	151.723
SPDEF	4.8161	1.23528	17.3038	2.78204e-48	1.16799e-47	98.6324
PRSS33	4.8051	-3.50219	22.7873	6.92583e-70	5.27118e-69	148.454
E2F8	4.79177	-1.30556	29.5496	5.26231e-95	9.03695e-94	206.198
FAM83E	4.79168	2.26336	23.3113	6.57989e-72	5.31829e-71	152.956
HLA-DQA1	4.7806	3.74847	28.6409	9.16817e-92	1.39339e-90	198.581
COL8A1	4.76943	3.81341	29.9012	3.01568e-96	5.37219e-95	208.905
CST6	4.7646	-0.0866613	15.9689	5.29901e-43	1.95012e-42	86.501
OLFML2B	4.74446	3.15211	30.9575	6.14126e-100	1.23077e-98	217.451
ST6GALNAC1	4.73867	2.30631	20.6136	2.14706e-61	1.27999e-60	128.748
LUZP2	4.73619	-2.76538	26.1276	1.42016e-82	1.61972e-81	177.626
MYO1A	4.73561	0.10088	15.3198	1.87948e-40	6.49975e-40	80.6391
ALPP	4.7346	-3.34271	18.0339	3.51977e-51	1.59183e-50	105.426
IQGAP3	4.73176	1.53354	22.2798	6.44439e-68	4.62238e-67	143.804
MSLNL	4.72439	-3.57806	23.1481	2.79789e-71	2.22829e-70	151.665
IFI27	4.70082	5.28067	38.2686	7.80442e-124	3.13459e-122	272.384
SPARC	4.69937	9.31886	35.6589	1.24662e-115	3.96486e-114	253.576
NRG3	4.69568	-1.10232	20.8247	3.16968e-62	1.93505e-61	130.746
CXCL9	4.69388	0.932766	16.239	4.56246e-44	1.71949e-43	88.9442
EREG	4.68577	-0.693667	16.1837	7.5363e-44	2.82665e-43	88.4677
BLACAT1	4.68305	-0.0141669	21.0028	6.32329e-63	3.93771e-62	132.326
THBS2	4.68179	6.09637	34.1387	1.0945e-110	2.99838e-109	242.065
TNFSF9	4.67618	-1.02157	23.9961	1.556e-74	1.37592e-73	159.07
FAM177B	4.66976	-1.18041	21.6409	1.99581e-65	1.33692e-64	138.114
LEF1	4.66217	1.6139	30.7311	3.75299e-99	7.29706e-98	215.712
CCL20	4.66034	0.804433	17.0037	4.30883e-47	1.76135e-46	95.8977
HJURP	4.65902	0.0394309	25.858	1.4369e-81	1.5879e-80	175.242
PCDH7	4.64744	2.46431	26.7	1.07336e-84	1.29439e-83	182.382
CDC20	4.64036	1.07154	24.5128	1.67387e-76	1.57333e-75	163.575
CAPN8	4.63998	3.627	20.6898	1.07592e-61	6.46345e-61	129.32
PTPRR	4.63868	-0.27264	22.9173	2.17542e-70	1.68253e-69	149.511
DMBT1	4.62908	3.53993	13.8277	1.14731e-34	3.42095e-34	67.1712
MMP28	4.62669	2.38954	25.3611	1.04456e-79	1.08621e-78	170.899
ZG16B	4.62498	1.59904	17.4364	8.28602e-49	3.52719e-48	99.831
H4C9	4.62353	-0.128827	27.9306	3.35774e-89	4.65797e-88	192.814
CREG2	4.6215	-0.756207	22.276	6.66437e-68	4.77491e-67	143.8
PIMREG	4.6087	-1.46656	27.763	1.36449e-88	1.85989e-87	191.441
CENPF	4.59604	1.89128	26.3709	1.77253e-83	2.07112e-82	179.611
CHST6	4.59185	-1.06365	22.2569	7.9089e-68	5.65004e-67	143.639
AQP5	4.59112	2.2768	14.6589	7.1155e-38	2.29782e-37	74.6508
HLA-DRB5	4.5875	4.03574	23.9024	3.54959e-74	3.08577e-73	158.032
VCAN	4.57621	5.93507	31.4671	1.0702e-101	2.2606e-100	221.343
HOXC11	4.57361	-3.34072	17.576	2.31499e-49	9.99364e-49	101.251
CXCL13	4.57053	-1.09664	14.2727	2.22712e-36	6.93449e-36	71.3254
NQO1	4.55898	4.75152	44.1546	4.29163e-141	2.60696e-139	312.168
LGR5	4.55301	-0.737672	19.4876	6.01991e-57	3.17641e-56	118.592
IGFBP3	4.55218	6.10107	39.3361	4.33788e-127	1.89395e-125	279.861
DNAH3	4.54816	-2.16645	25.6033	1.28852e-80	1.3705e-79	173.107
TMC5	4.54171	4.15723	31.3114	3.67383e-101	7.60424e-100	220.192
ALPG	4.54047	-3.66722	18.8791	1.55437e-54	7.62949e-54	113.16
NPFFR1	4.54037	-2.50935	28.5454	2.01959e-91	3.02474e-90	197.981
NDP	4.53914	-2.89626	28.293	1.63894e-90	2.38347e-89	195.897
PRAP1	4.53523	-1.15713	14.2815	2.06025e-36	6.42002e-36	71.4039
S100A5	4.53448	-3.5191	33.405	2.94966e-108	7.5222e-107	236.725
SULT1B1	4.53141	1.22468	13.3954	5.11857e-33	1.46223e-32	63.5606
CDC25C	4.52587	-1.69149	27.904	4.19638e-89	5.80901e-88	192.627
CD70	4.51989	-2.78587	26.4365	1.01234e-83	1.18927e-82	180.269
CRABP2	4.50482	2.50942	18.6721	1.03071e-53	4.9462e-53	111.043
LYZ	4.49828	6.95126	23.3787	3.6191e-72	2.94956e-71	153.296
SFRP4	4.49223	4.34462	26.0353	3.1351e-82	3.54261e-81	176.557
SCT	4.47335	-2.71775	26.817	3.97275e-85	4.85063e-84	183.504
GDPD2	4.46981	-2.39719	23.2222	1.4496e-71	1.16301e-70	152.287
BATF	4.46522	0.919016	26.7462	7.24933e-85	8.79088e-84	182.831
IGLL5	4.46032	1.56279	13.0779	8.14738e-32	2.26368e-31	60.7883
ANKRD40CL	4.45933	-2.98354	18.5129	4.41489e-53	2.0889e-52	109.791
DAPP1	4.45272	1.06938	30.5441	1.68166e-98	3.18733e-97	214.221
KPNA7	4.44838	-1.51302	24.5761	9.6304e-77	9.10003e-76	164.174
SEMA7A	4.44618	2.85257	27.0477	5.6269e-86	7.05979e-85	185.295
C6orf15	4.43651	-3.71115	17.3868	1.30357e-48	5.51425e-48	99.5464
COL5A1	4.43193	6.88902	34.5786	3.94461e-112	1.14816e-110	245.386
PLA2G7	4.421	0.25198	24.4845	2.1444e-76	2.00787e-75	163.333
DLX5	4.41978	-2.82333	27.2151	1.36636e-86	1.75368e-85	186.876
BUB1	4.41692	0.597735	29.0317	3.65452e-93	5.84962e-92	201.935
SFRP2	4.4117	6.4549	23.912	3.26271e-74	2.84144e-73	157.989
TMEM92	4.40869	1.53946	23.5354	9.04624e-73	7.51676e-72	154.969
CHIT1	4.40576	0.131782	13.6852	4.02758e-34	1.18501e-33	66.1072
HS3ST1	4.39745	2.57849	27.5486	8.24256e-88	1.09677e-86	189.538
HPGD	4.39729	2.32911	20.6029	2.36375e-61	1.40745e-60	128.635
MARCO	4.38963	0.887986	12.8184	7.70331e-31	2.08983e-30	58.5698
PTGS2	4.38141	1.61582	16.6957	7.14473e-46	2.82211e-45	93.0741
DEPDC1	4.38	-1.03896	25.4857	3.5553e-80	3.73679e-79	172.063
TMEM150B	4.37883	-1.03042	21.1401	1.82704e-63	1.15616e-62	133.602
HCAR1	4.37522	-1.44346	20.3503	2.34034e-60	1.34996e-59	126.467
SLC9A4	4.3729	-2.75225	15.4812	4.3798e-41	1.53998e-40	82.2111
ADAMTS14	4.37182	1.07446	23.4846	1.41792e-72	1.17172e-71	154.533
SPOCD1	4.37064	-0.189917	22.9432	1.72831e-70	1.34097e-69	149.743
ASPM	4.36994	0.678629	25.6321	1.00526e-80	1.07507e-79	173.297
ADAMDEC1	4.36472	-1.27864	21.4825	8.31247e-65	5.45793e-64	136.702
CD1C	4.36407	-0.861772	20.8145	3.47531e-62	2.12031e-61	130.655
GPR1	4.34818	-2.50484	25.2219	3.48809e-79	3.54795e-78	169.825
HES2	4.34797	-1.87759	23.0236	8.45455e-71	6.63342e-70	150.51
DIPK1C	4.34407	-2.34711	26.0999	1.80151e-82	2.0475e-81	177.385
IDO1	4.33797	-0.148206	19.4879	6.00082e-57	3.16805e-56	118.585
TFAP2A	4.33474	0.814597	20.3927	1.59345e-60	9.22944e-60	126.8
PLAT	4.33469	5.6735	32.9275	1.16704e-106	2.85341e-105	232.766
APOL1	4.32702	5.66918	44.9936	2.01332e-143	1.29117e-141	317.498
MIA	4.32293	-0.100037	14.5441	1.98401e-37	6.33793e-37	73.7068
SEMA3C	4.31495	3.51611	30.2886	1.31414e-97	2.41585e-96	212.038
SLC22A18AS	4.31372	-1.04678	28.3932	7.13369e-91	1.04992e-89	196.688
MOGAT3	4.30286	-3.52244	20.246	6.03585e-60	3.43901e-59	125.601
DNAJC5B	4.302	-2.39495	27.9751	2.3169e-89	3.24168e-88	193.244
MUC13	4.29801	4.19613	23.6878	2.35349e-73	1.99542e-72	156.105
GPX2	4.29372	4.98586	25.9114	9.07834e-82	1.01181e-80	175.431
KERA	4.28578	-3.75598	30.1394	4.38183e-97	7.93598e-96	211.037
CD1E	4.28475	-1.91332	21.7329	8.7225e-66	5.91172e-65	138.98
PLAUR	4.28323	4.03832	41.9272	9.32647e-135	5.09569e-133	297.589
CXCL10	4.28022	-0.0895067	18.2998	3.09826e-52	1.44068e-51	107.743
HOXA10	4.2793	-1.53917	17.7445	4.96268e-50	2.18528e-49	102.72
CLCN1	4.27409	-2.78898	22.898	2.58504e-70	1.99461e-69	149.426
CCL19	4.26966	1.0573	11.0953	1.51408e-24	3.55784e-24	44.1443
HLA-DQB1	4.26221	4.29214	24.7373	2.35794e-77	2.27872e-76	165.31
SLC2A1	4.26152	5.09368	34.017	2.75758e-110	7.40909e-109	241.142
EXO1	4.24493	-1.02094	28.0099	1.73244e-89	2.43438e-88	193.5
TFF3	4.24213	3.48371	14.7538	3.041e-38	9.90211e-38	75.3572
IBSP	4.24122	-3.06151	20.1141	2.00293e-59	1.12643e-58	124.388
KYNU	4.2335	1.5058	29.7	1.54535e-95	2.67971e-94	207.388
CDA	4.22832	0.946028	17.1955	7.48361e-48	3.11247e-47	97.6502
CATSPER1	4.22732	-1.67613	24.7629	1.8862e-77	1.83006e-76	165.814
CD207	4.22432	-1.63295	21.8326	3.55948e-66	2.44379e-65	139.866
TMEM45B	4.2242	2.48933	22.3098	4.92414e-68	3.55017e-67	143.996
IL1A	4.224	-2.47217	20.7583	5.78026e-62	3.50037e-61	130.207
ZNF488	4.22378	-1.40128	22.1317	2.42807e-67	1.71641e-66	142.54
RHBDL2	4.20462	0.888277	26.2207	6.39935e-83	7.35436e-82	178.353
IYD	4.20076	0.638684	15.647	9.78345e-42	3.4895e-41	83.5941
NEIL3	4.19972	-2.5516	27.2082	1.44853e-86	1.85548e-85	186.815
GRIN2D	4.18707	0.885813	18.8697	1.69326e-54	8.29663e-54	112.936
DKK2	4.18537	-0.936402	24.6652	4.42325e-77	4.22868e-76	164.942
ANKFN1	4.18231	-2.32585	22.3701	2.86983e-68	2.08444e-67	144.707
KIF18B	4.17778	-0.0378112	23.7395	1.49167e-73	1.27188e-72	156.797
COL5A2	4.1734	6.22014	37.0008	6.81697e-120	2.41121e-118	263.257
PTGES	4.17312	2.27536	20.4058	1.41478e-60	8.20429e-60	126.841
C5orf46	4.16347	-1.42893	20.6024	2.3749e-61	1.41367e-60	128.757
AHNAK2	4.16332	4.3898	28.5439	2.04465e-91	3.05993e-90	197.693
APELA	4.16326	-3.9478	22.9923	1.11678e-70	8.71673e-70	150.304
ADGRG7	4.16298	-2.93052	16.513	3.77326e-45	1.46062e-44	91.5664
DHDH	4.15684	-2.43929	22.6355	2.68107e-69	2.0085e-68	147.08
DTL	4.15629	0.251847	28.2909	1.66874e-90	2.425e-89	195.817
DKK4	4.15321	-3.50824	21.1207	2.17748e-63	1.37703e-62	133.523
TREM1	4.14798	0.309678	20.1768	1.13293e-59	6.41206e-59	124.847
HRH1	4.14432	1.56825	30.3035	1.16522e-97	2.14611e-96	212.271
DCSTAMP	4.13912	-2.49636	24.3469	7.15235e-76	6.59283e-75	162.21
GATA3	4.13887	0.121981	22.716	1.30749e-69	9.89722e-69	147.72
GREM1	4.13549	4.34936	21.3683	2.32752e-64	1.50999e-63	135.366
FAM111B	4.13451	-0.222005	25.1753	5.22176e-79	5.29485e-78	169.361
SKA3	4.12553	-0.679907	27.7784	1.19924e-88	1.64036e-87	191.559
LUM	4.12551	7.56477	27.8753	5.33359e-89	7.3572e-88	192.093
CCL15	4.12411	-2.57692	18.7408	5.50109e-54	2.66011e-53	111.865
JCHAIN	4.11816	3.90069	15.9856	4.5556e-43	1.67969e-42	86.406
B3GNT3	4.11358	3.83696	32.4	7.01245e-105	1.62902e-103	228.756
EDAR	4.11146	-0.17588	20.1216	1.87076e-59	1.0527e-58	124.355
GJB5	4.11043	-0.69772	15.7507	3.82679e-42	1.37824e-41	84.5614
COL22A1	4.10167	1.12992	18.8977	1.31116e-54	6.45191e-54	113.185
FOXD1	4.10108	-2.18139	20.1537	1.39688e-59	7.89451e-59	124.718
LGR6	4.0943	0.505952	16.8681	1.48338e-46	5.97014e-46	94.674
HTRA3	4.08217	4.91716	35.6924	9.73197e-116	3.1155e-114	253.71
NOX4	4.08121	0.724247	22.6381	2.61841e-69	1.96306e-68	147.021
PADI3	4.07994	-3.25774	17.8329	2.21265e-50	9.83399e-50	103.605
KIF26B	4.07383	2.82435	30.7153	4.25719e-99	8.26098e-98	215.506
FABP6	4.07173	-2.69997	16.3455	1.73164e-44	6.59737e-44	90.036
MZB1	4.06823	0.478982	16.9343	8.11064e-47	3.28592e-46	95.2783
C8orf74	4.06787	-3.97052	23.7925	9.35131e-74	8.00839e-73	157.384
SPINK4	4.06546	-2.74078	14.0936	1.09258e-35	3.34076e-35	69.8286
HECW1	4.06426	-2.00917	23.5646	6.9877e-73	5.84349e-72	155.316
TNFRSF9	4.06339	-1.37133	25.2306	3.23303e-79	3.29022e-78	169.874
NCAPH	4.06297	0.0165886	28.9436	7.54341e-93	1.19473e-91	201.22
NPTX1	4.06294	0.859349	18.2342	5.64089e-52	2.6041e-51	107.135
ESM1	4.06274	0.451869	19.2608	4.76588e-56	2.44097e-55	116.508
MCM10	4.06175	-1.02074	25.6324	1.0021e-80	1.07227e-79	173.335
TIGIT	4.0601	-0.655428	22.8843	2.91895e-70	2.24959e-69	149.24
PNOC	4.05748	-2.66338	23.2685	9.61112e-72	7.73636e-71	152.718
MFSD2A	4.05388	1.01537	21.042	4.43316e-63	2.77747e-62	132.68
UBE2T	4.039	0.352086	27.2744	8.28551e-87	1.07186e-85	187.309
HOXC8	4.03784	-2.33591	21.5397	4.96451e-65	3.27728e-64	137.262
FCRLA	4.03379	-2.81665	16.413	9.37763e-45	3.59308e-44	90.6577
RRM2	4.02532	1.93303	25.6629	7.70713e-81	8.2876e-80	173.515
NTF4	4.01822	-3.14082	19.014	4.53424e-55	2.25559e-54	114.382
RTKN2	4.01742	0.426066	23.5105	1.12755e-72	9.33344e-72	154.772
FGFBP1	4.0156	-0.271507	14.9777	4.0847e-39	1.36064e-38	77.5912
SLC16A3	4.01508	4.64989	36.4079	5.0716e-118	1.72223e-116	258.982
PNPLA3	4.01485	-1.90916	23.2161	1.53056e-71	1.22746e-70	152.228
PRND	4.00956	-2.62883	21.8409	3.30128e-66	2.2697e-65	139.981
MOGAT2	4.00589	-2.51064	16.8935	1.17664e-46	4.75224e-46	95.0138
ITGA2	3.99817	4.33892	41.3266	5.22658e-133	2.71172e-131	293.535
FCER1A	3.99809	-1.03579	19.6652	1.19234e-57	6.38267e-57	120.237
ACTB	3.98922	11.4592	38.5489	1.07655e-124	4.45185e-123	274.499
NUF2	3.98648	-0.254458	26.1437	1.23733e-82	1.41368e-81	177.709
CD52	3.98093	1.94611	20.1612	1.30482e-59	7.3785e-59	124.64
CARD11	3.97978	3.54646	37.6974	4.54788e-122	1.71967e-120	268.373
ZPLD1	3.97032	-2.16367	19.5096	4.92435e-57	2.60466e-56	118.865
FAM83D	3.9691	0.469092	20.9975	6.63146e-63	4.12568e-62	132.287
PLAU	3.96778	4.78885	32.875	1.75152e-106	4.27179e-105	232.376
IGFBP1	3.96435	-1.90184	16.0163	3.44724e-43	1.27415e-42	87.02
HLA-DRB1	3.96102	6.22053	32.0443	1.13305e-103	2.55623e-102	225.857
SLPI	3.95998	4.62639	28.9774	5.71403e-93	9.0941e-92	201.244
NDC80	3.9592	0.417085	30.3042	1.15824e-97	2.13527e-96	212.299
FNDC1	3.95481	3.56399	22.7962	6.39837e-70	4.87542e-69	148.222
THSD7B	3.95145	-1.55374	22.0857	3.66877e-67	2.57763e-66	142.141
AREG	3.94989	1.92027	17.3737	1.46937e-48	6.21023e-48	99.2151
MMP7	3.94894	6.92484	23.965	2.04569e-74	1.79837e-73	158.446
CDC45	3.94816	-0.304232	24.7306	2.49972e-77	2.41336e-76	165.498
CDCA2	3.94409	-0.912935	26.2082	7.12617e-83	8.18485e-82	178.279
CDK1	3.94324	1.51461	26.3654	1.85843e-83	2.17021e-82	179.567
CTLA4	3.93471	-1.5983	23.5616	7.17605e-73	5.99332e-72	155.279
ATP6V0D2	3.93251	-2.5354	24.8161	1.18601e-77	1.16049e-76	166.312
CR2	3.93091	-1.16393	9.85113	2.95522e-20	6.28783e-20	34.4025
KIF14	3.93067	-0.491097	25.9203	8.41324e-82	9.38215e-81	175.8
CCN4	3.9277	1.84662	19.2231	6.7212e-56	3.43165e-55	116.105
TMIGD3	3.92688	0.426175	24.1968	2.66676e-75	2.41266e-74	160.82
CGB8	3.91819	-4.14088	19.5782	2.63431e-57	1.39905e-56	119.559
FEZF1	3.91752	-3.84914	16.9335	8.17582e-47	3.31164e-46	95.4324
GNA15	3.90727	2.24022	28.7468	3.82126e-92	5.91796e-91	199.524
APOC1	3.90109	3.07468	21.3966	1.80358e-64	1.17515e-63	135.717
FCRL3	3.89785	-1.86268	17.911	1.08303e-50	4.84099e-50	104.269
SHISA2	3.89517	0.766184	24.2852	1.22876e-75	1.12468e-74	161.59
ZNF365	3.89505	0.365678	21.9524	1.21238e-66	8.42419e-66	140.893
MUC4	3.89458	2.74871	14.1327	7.72172e-36	2.36846e-35	69.8895
SIX1	3.89427	-1.71053	19.5138	4.73732e-57	2.50777e-56	118.884
UCN2	3.88813	-3.22838	22.1884	1.46007e-67	1.03813e-66	143.119
BCO1	3.88728	-1.17931	24.0748	7.78703e-75	6.94231e-74	159.787
CD74	3.88533	9.34456	28.3821	7.81879e-91	1.1473e-89	196.437
RAET1L	3.8838	-2.45729	18.7133	7.0697e-54	3.40935e-53	111.616
CENPA	3.87983	-1.19411	24.6453	5.26013e-77	5.01405e-76	164.781
AURKB	3.87855	0.105371	23.9432	2.47731e-74	2.16903e-73	158.594
CALB2	3.87576	0.446774	14.6612	6.96546e-38	2.25086e-37	74.7503
TMEM238L	3.87573	-2.06289	15.1968	5.6941e-40	1.93968e-39	79.6383
KLHDC7B	3.87308	-0.272209	15.6915	6.5443e-42	2.34573e-41	84.0193
ADAMTS12	3.87269	2.91028	24.2426	1.78456e-75	1.62127e-74	161.075
FOXQ1	3.87181	2.54586	24.8136	1.21266e-77	1.18598e-76	166.098
ISLR	3.86578	5.29871	35.8053	4.22749e-116	1.36904e-114	254.514
ANXA8	3.86161	-0.0562937	12.9878	1.77963e-31	4.8931e-31	60.0533
SUCNR1	3.85958	-0.775906	18.2878	3.45541e-52	1.60503e-51	107.666
ALDH3A1	3.85777	0.451306	13.8677	8.06424e-35	2.41483e-34	67.7155
LAIR2	3.84941	-3.96854	24.5705	1.01118e-76	9.54568e-76	164.209
SRMS	3.84065	-1.97477	18.4071	1.16138e-52	5.44762e-52	108.802
PTTG1	3.83627	1.16341	24.6518	4.97186e-77	4.74388e-76	164.785
CRACD	3.83508	1.41641	20.4926	6.42917e-61	3.77075e-60	127.684
CD79A	3.83408	0.360084	12.7614	1.25949e-30	3.39989e-30	58.0965
ANKS4B	3.83306	0.305312	15.3801	1.09088e-40	3.79741e-40	81.1994
CYP2B6	3.82946	-2.57792	16.8158	2.39139e-46	9.5734e-46	94.3153
PHLDA2	3.82903	2.42282	18.0808	2.29389e-51	1.04394e-50	105.617
SFTA2	3.82426	1.39369	13.9445	4.09184e-35	1.23494e-34	68.3566
CDH11	3.82039	4.40074	32.1607	4.54923e-104	1.03952e-102	226.831
TNFSF18	3.81509	-3.03698	19.5714	2.80442e-57	1.48859e-56	119.465
EGR2	3.81284	1.8794	20.2004	9.14059e-60	5.18532e-59	124.994
SLC44A4	3.81244	5.32012	33.156	2.00095e-107	5.00494e-106	234.512
KCP	3.81043	0.987794	15.9219	8.11188e-43	2.97076e-42	86.0753
RDM1	3.80862	-3.53558	24.7175	2.80112e-77	2.69768e-76	165.482
MELK	3.80567	0.400554	22.8069	5.81428e-70	4.43727e-69	148.532
DEPDC1B	3.8055	-0.496711	24.9383	4.09441e-78	4.05708e-77	167.315
VILL	3.80307	4.20164	29.1934	9.69084e-94	1.59021e-92	203.037
GRP	3.80149	-0.84817	15.415	7.96372e-41	2.77665e-40	81.548
TMEM154	3.79517	1.59036	28.8471	1.67121e-92	2.6214e-91	200.39
COL8A2	3.79499	2.8002	23.1125	3.83632e-71	3.04292e-70	151.104
ADGRE3	3.79398	-3.45078	21.8289	3.67998e-66	2.52474e-65	139.906
HLA-DRA	3.78751	7.12748	29.3239	3.32814e-94	5.54974e-93	204.053
C15orf48	3.7757	3.19891	23.8	8.75036e-74	7.50689e-73	157.15
HOXC9	3.77305	-2.1973	19.0996	2.07487e-55	1.04196e-54	115.132
CDX1	3.76709	-2.52507	19.377	1.65034e-56	8.59669e-56	117.674
UPK3A	3.76254	-3.72189	22.8207	5.14492e-70	3.93257e-69	148.779
OAS1	3.75988	3.5883	31.5226	6.89416e-102	1.461e-100	221.861
RIPPLY3	3.75877	-2.85918	23.0094	9.5891e-71	7.50251e-70	150.433
OAS2	3.7532	3.45723	27.2382	1.12479e-86	1.44839e-85	186.823
LAMA3	3.74869	5.30889	35.094	8.28302e-114	2.53943e-112	249.221
SLAMF7	3.74762	1.10812	20.3029	3.60056e-60	2.06288e-59	125.979
IGFL1	3.74739	-3.89352	15.2419	3.79384e-40	1.29892e-39	80.1233
ITGB6	3.74634	5.15822	33.9941	3.28081e-110	8.79078e-109	240.936
TCL1A	3.74633	-3.3648	13.3231	9.63461e-33	2.73041e-32	63.1096
FOXP3	3.74577	-0.652215	27.4776	1.49768e-87	1.97804e-86	189.043
MUC3A	3.74379	3.83351	17.8888	1.32622e-50	5.91986e-50	103.711
CEACAM1	3.74158	3.50706	29.1094	1.93074e-93	3.12626e-92	202.402
H3C10	3.735	-1.58007	18.2276	5.99168e-52	2.76278e-51	107.15
HOXB8	3.73434	-2.26833	18.4926	5.31706e-53	2.51151e-52	109.597
MYB	3.72858	-0.796708	24.1582	3.74171e-75	3.37271e-74	160.51
AC090004.1	3.72768	-3.59758	24.0156	1.31025e-74	1.16071e-73	159.343
BIRC5	3.72626	1.36688	20.6634	1.36638e-61	8.18821e-61	129.234
EFNA5	3.72226	2.33029	25.9368	7.29989e-82	8.17788e-81	175.831
TM4SF20	3.72136	-2.32637	11.4321	9.52243e-26	2.29836e-25	47.0298
CPA6	3.7192	-3.27755	14.6965	5.08218e-38	1.64609e-37	75.2175
IL22RA2	3.71885	-4.17618	24.297	1.10795e-75	1.01697e-74	161.822
SLC13A5	3.71511	-0.284604	11.2822	3.2757e-25	7.82424e-25	45.7022
IL17REL	3.71508	-3.77095	20.2195	7.6814e-60	4.37149e-59	125.382
SERPINB4	3.71431	-3.19634	16.2082	6.03567e-44	2.2686e-43	88.8231
KNL1	3.71416	0.448667	26.7062	1.01829e-84	1.22949e-83	182.503
ANTXR1	3.71152	5.44926	32.484	3.64367e-105	8.56614e-104	229.294
SIRPG	3.70702	-1.70603	22.6829	1.75597e-69	1.32408e-68	147.491
CCL26	3.70442	-2.56799	20.7859	4.5032e-62	2.73464e-61	130.475
RNF223	3.7037	-1.60285	19.669	1.15155e-57	6.16767e-57	120.298
TRABD2A	3.70021	0.209692	20.8142	3.4855e-62	2.1252e-61	130.637
DQX1	3.69746	-1.41293	14.5034	2.8543e-37	9.07954e-37	73.4098
HOPX	3.69459	3.26404	30.2791	1.41838e-97	2.60502e-96	211.946
HAVCR1	3.69329	-3.38407	18.0618	2.72828e-51	1.23817e-50	105.712
ANO1	3.692	4.68589	40.9765	5.56226e-132	2.83327e-130	291.135
HOXB7	3.68991	1.28765	20.7644	5.47217e-62	3.31688e-61	130.153
MND1	3.6895	-1.56605	25.4666	4.19387e-80	4.38909e-79	171.928
ZBP1	3.68881	-0.434907	23.5741	6.42921e-73	5.38336e-72	155.357
UGT1A6	3.68587	-2.39958	16.3635	1.47046e-44	5.60996e-44	90.2022
ASF1B	3.68447	1.04739	24.4825	2.18263e-76	2.04085e-75	163.31
CCR8	3.68332	-3.92543	23.4793	1.48663e-72	1.22798e-71	154.625
ENTHD1	3.6828	-3.93023	21.6572	1.72313e-65	1.15664e-64	138.378
PRR11	3.68273	0.424067	26.85	3.00288e-85	3.67792e-84	183.725
AGR3	3.68259	2.22712	15.5752	1.8736e-41	6.63545e-41	82.8354
ODAM	3.67494	-0.721484	15.9408	6.83482e-43	2.50777e-42	86.2958
DPYSL3	3.673	5.30139	38.0863	2.84403e-123	1.12382e-121	271.037
BGN	3.67269	8.04612	28.7391	4.07343e-92	6.28857e-91	199.294
SELPLG	3.67096	3.07668	29.3519	2.64577e-94	4.42319e-93	204.425
CENPM	3.66747	-0.0534101	21.3203	3.59054e-64	2.31785e-63	135.214
POU2AF1	3.66664	0.554467	14.2206	3.53967e-36	1.09516e-35	70.8366
SYNDIG1	3.66541	0.49423	22.7119	1.35663e-69	1.02652e-68	147.687
FRMD5	3.66271	0.30004	23.424	2.42358e-72	1.98514e-71	154.014
TIMP1	3.65391	7.47308	28.1582	5.03054e-90	7.20859e-89	194.434
WNT7B	3.65006	1.76621	18.3103	2.81368e-52	1.30913e-51	107.768
CYP4F3	3.64891	1.17575	15.8904	1.07977e-42	3.93888e-42	85.7779
P2RY10	3.64888	-2.23932	19.9709	7.36818e-59	4.0793e-58	123.075
NDNF	3.64772	0.189872	18.1752	9.67286e-52	4.43406e-51	106.614
MDK	3.64533	5.28909	39.6047	6.71542e-128	3.04059e-126	281.699
CXCR3	3.64427	-0.714492	23.5306	9.43888e-73	7.82971e-72	154.982
FOSL1	3.64376	1.90099	18.0044	4.61199e-51	2.08098e-50	104.962
NRP2	3.64281	4.09683	37.1956	1.66882e-120	6.00038e-119	264.718
H2BC11	3.64263	-2.05193	19.8895	1.54581e-58	8.49325e-58	122.325
SYT12	3.64211	1.0488	15.6801	7.25292e-42	2.59592e-41	83.8849
SGO1	3.64108	-1.26184	24.2839	1.24292e-75	1.13658e-74	161.628
ST6GAL2	3.64082	-0.390099	21.1981	1.08183e-63	6.88824e-63	134.124
S100A14	3.63359	4.73899	29.1499	1.38419e-93	2.2506e-92	202.628
DLEU7	3.63263	-2.3829	25.5493	2.05304e-80	2.17537e-79	172.668
FXYD5	3.62946	5.19511	43.9869	1.2638e-140	7.60612e-139	311.032
TWIST1	3.62817	0.202017	18.5243	3.97944e-53	1.88561e-52	109.8
BCL2A1	3.62676	0.0621408	21.6199	2.4109e-65	1.60946e-64	137.915
GABRD	3.62505	-1.25389	24.0921	6.68996e-75	5.98334e-74	159.945
PLA2G2F	3.6243	-3.83893	15.3418	1.54192e-40	5.34751e-40	81.0221
GSDMC	3.62333	-2.29973	20.0504	3.57606e-59	1.99908e-58	123.798
SDS	3.62216	0.731753	17.8229	2.42319e-50	1.0758e-49	103.385
CD28	3.6216	-0.999755	20.236	6.61271e-60	3.76549e-59	125.435
TDO2	3.62094	-0.428341	22.3056	5.11352e-68	3.68399e-67	144.08
COL12A1	3.61424	5.9147	27.7716	1.26998e-88	1.73227e-87	191.147
HAS2	3.61372	0.549882	18.0352	3.47827e-51	1.57343e-50	105.33
CRISPLD1	3.60889	0.697143	20.9868	7.30524e-63	4.54197e-62	132.192
TBX15	3.60886	-0.856318	16.7043	6.60391e-46	2.61165e-45	93.2307
FOXC2	3.60883	-0.977933	19.0749	2.60048e-55	1.30124e-54	114.862
FXYD3	3.60809	5.56916	30.2423	1.90936e-97	3.48711e-96	211.483
COX6B2	3.60504	-0.319837	14.3501	1.11913e-36	3.51312e-36	72.0057
ACTBL2	3.60422	-3.38944	20.0263	4.45217e-59	2.48104e-58	123.618
DRP2	3.60162	-0.980615	22.3425	3.6756e-68	2.66178e-67	144.427
ESPN	3.6	0.315374	14.8334	1.4908e-38	4.8877e-38	76.2966
KRT20	3.59647	-2.39708	10.5279	1.47041e-22	3.30323e-22	39.7399
MMP3	3.59377	-1.09357	16.7562	4.11479e-46	1.63621e-45	93.7155
SHCBP1	3.59361	0.332823	26.7406	7.60419e-85	9.20408e-84	182.798
LYPD2	3.59066	-3.337	12.6352	3.73038e-30	9.96806e-30	57.1753
TMEM200C	3.58363	-0.995188	27.5013	1.22652e-87	1.62539e-86	189.254
TNC	3.58183	4.00213	22.5765	4.54074e-69	3.38608e-68	146.198
IGF2BP1	3.57832	-3.17998	17.0065	4.20014e-47	1.71728e-46	96.0823
CXCL14	3.56429	4.66224	21.5665	3.89952e-65	2.58734e-64	137.077
ACSL5	3.56401	4.61676	38.3469	4.48522e-124	1.81637e-122	272.91
KIF2C	3.56042	1.08475	24.0263	1.19332e-74	1.05856e-73	159.307
LILRA4	3.55862	-3.10983	19.3055	3.16871e-56	1.63406e-55	117.052
CD19	3.55516	-1.92659	15.0604	1.94283e-39	6.53174e-39	78.419
BCL11B	3.55331	0.755366	25.6314	1.01103e-80	1.08064e-79	173.298
SCUBE3	3.54933	0.383404	15.8132	2.17409e-42	7.87356e-42	85.1117
LPAR5	3.54904	1.51604	26.5593	3.55425e-84	4.22621e-83	181.213
HTRA4	3.5483	-2.76015	21.6767	1.44578e-65	9.7381e-65	138.523
TNFRSF18	3.54737	-1.2414	22.4278	1.71407e-68	1.25523e-67	145.199
FAM151A	3.54479	-3.23712	22.4056	2.0894e-68	1.52381e-67	145.07
KIFC1	3.54119	1.25953	23.9514	2.30483e-74	2.02254e-73	158.638
EDIL3	3.54074	3.44297	26.0364	3.10429e-82	3.50982e-81	176.577
KRT6B	3.53949	1.02602	11.2179	5.55543e-25	1.31938e-24	45.14
VNN1	3.53417	2.50205	14.321	1.4493e-36	4.53572e-36	71.5666
OLR1	3.532	2.27119	15.836	1.76807e-42	6.41979e-42	85.1798
ITGA11	3.52802	3.47713	22.0541	4.86876e-67	3.41459e-66	141.569
HOXA11	3.5279	-3.40763	15.323	1.82601e-40	6.32043e-40	80.8401
RASSF10	3.52265	-2.68977	16.066	2.19598e-43	8.16137e-43	87.5202
LY6D	3.52196	-0.070333	9.06193	1.12647e-17	2.24856e-17	28.4719
NT5E	3.51321	3.25893	27.4449	1.97079e-87	2.59063e-86	188.565
TNIP3	3.51099	-3.62655	23.302	7.14283e-72	5.76614e-71	153.053
HS3ST3A1	3.50469	-1.71172	19.3934	1.42153e-56	7.43452e-56	117.799
MDFI	3.50464	2.65895	29.4303	1.3937e-94	2.35617e-93	205.092
ITGB4	3.50439	6.75303	39.7065	3.31901e-128	1.51328e-126	282.399
GTSE1	3.49952	0.195314	24.5772	9.53466e-77	9.01391e-76	164.159
HMMR	3.49818	0.426384	23.8818	4.25587e-74	3.69484e-73	158.057
CD300LF	3.49587	0.208157	22.3104	4.8995e-68	3.53371e-67	144.11
ANOS1	3.49544	0.823592	20.8802	1.91724e-62	1.17966e-61	131.224
HSD17B6	3.49458	-0.773153	21.9089	1.79269e-66	1.24036e-65	140.537
IFI6	3.48961	5.34907	25.182	4.92752e-79	4.99908e-78	169.052
BUB1B	3.4864	0.606764	23.8706	4.69464e-74	4.07035e-73	157.955
ICOS	3.48549	-2.26882	20.6189	2.04467e-61	1.21932e-60	128.961
XDH	3.48386	1.89394	17.9286	9.21845e-51	4.13074e-50	104.263
MUC12	3.47976	-0.959673	20.3385	2.60591e-60	1.50137e-59	126.364
PTHLH	3.47945	0.0060578	20.0752	2.85399e-59	1.59908e-58	123.942
H4C8	3.47739	-1.97591	20.166	1.24912e-59	7.0656e-59	124.84
FHL2	3.47734	4.63817	45.613	4.02363e-145	2.68608e-143	321.41
CACNG6	3.47491	-3.64939	13.9062	5.73741e-35	1.72466e-34	68.2308
ECM1	3.47251	4.04782	27.6166	4.65632e-88	6.25104e-87	189.934
FCAMR	3.47217	-3.74314	18.5038	4.79694e-53	2.26857e-52	109.761
HEPH	3.46813	3.45224	28.5867	1.43499e-91	2.15744e-90	198.08
DSG3	3.46658	-0.241793	10.537	1.36788e-22	3.07608e-22	39.7097
LGALS9B	3.46323	-3.50722	16.1201	1.34341e-43	5.00992e-43	88.0428
HLA-B	3.45405	9.31721	30.9473	6.66474e-100	1.32887e-98	217.322
EDNRA	3.45237	2.89823	26.8379	3.32722e-85	4.06498e-84	183.464
PF4	3.45076	-3.2975	20.048	3.65322e-59	2.04104e-58	123.816
ADAM19	3.4497	3.09978	24.4946	1.96235e-76	1.84006e-75	163.241
LTB	3.44864	1.52465	15.5615	2.12043e-41	7.50147e-41	82.7724
AEBP1	3.44711	7.44819	27.4545	1.8178e-87	2.39435e-86	188.531
NOG	3.44675	-1.69312	19.6078	2.01093e-57	1.07118e-56	119.753
THY1	3.44547	5.52739	28.902	1.06274e-92	1.67638e-91	200.541
SLC4A11	3.44534	1.52096	16.1621	9.17299e-44	3.43001e-43	88.2057
S100A11	3.4414	7.35309	36.6667	7.69025e-119	2.6649e-117	260.837
SLC7A4	3.43899	-0.554099	18.4306	9.36729e-53	4.40549e-52	108.97
CNR2	3.43751	-3.54994	15.8959	1.02686e-42	3.74867e-42	86.0169
PLAAT4	3.43722	3.61244	27.454	1.82553e-87	2.40291e-86	188.607
SULT2B1	3.43222	0.532372	16.0713	2.09181e-43	7.78162e-43	87.4459
LGALS4	3.43121	6.30164	23.6658	2.85796e-73	2.41894e-72	155.758
RAC2	3.42968	3.63473	35.8987	2.12383e-116	6.93524e-115	255.28
TMEM171	3.42867	-0.034646	19.7972	3.58201e-58	1.95056e-57	121.417
SELL	3.42853	1.51473	15.868	1.32268e-42	4.81512e-42	85.542
HOXB13	3.42578	-3.61669	13.061	9.43356e-32	2.61397e-31	60.8529
CDCA5	3.41966	1.28004	23.5293	9.55178e-73	7.92e-72	154.911
CYP26A1	3.41899	-3.01046	16.0241	3.21277e-43	1.18838e-42	87.1567
LCK	3.4155	1.65397	21.2693	5.68923e-64	3.64737e-63	134.681
SEMA3A	3.41102	0.832006	20.3734	1.89799e-60	1.09771e-59	126.631
CTSK	3.40927	4.84431	30.5726	1.33696e-98	2.55132e-97	214.17
ASPN	3.40844	3.99669	25.005	2.29189e-78	2.28255e-77	167.604
TMSB10	3.40805	8.55712	37.8199	1.89555e-122	7.26999e-121	269.221
SAA2-SAA4	3.40653	-3.28592	16.1473	1.04889e-43	3.91907e-43	88.2844
ARSI	3.40495	0.172246	20.6441	1.62804e-61	9.72945e-61	129.103
HOXC10	3.40381	-2.37636	11.7417	7.26391e-27	1.79896e-26	49.6005
B2M	3.40343	10.4703	31.3679	2.34837e-101	4.89703e-100	220.739
LIF	3.39882	3.62744	23.8257	6.97553e-74	6.01063e-73	157.311
ZNF469	3.3984	2.2176	22.3976	2.24533e-68	1.63449e-67	144.766
AKR1B15	3.39816	-3.86454	20.8551	2.40673e-62	1.47572e-61	131.147
SERTAD4	3.39744	0.601028	23.0306	7.94538e-71	6.24645e-70	150.525
LDLRAD1	3.3971	-3.00798	19.0019	5.06329e-55	2.51557e-54	114.284
MAB21L4	3.39149	0.652176	15.9947	4.19331e-43	1.54728e-42	86.7489
S100A16	3.39055	5.96004	46.1117	1.77251e-146	1.2251e-144	324.498
DOK5	3.39022	0.681658	22.5636	5.09359e-69	3.78968e-68	146.363
JPT1	3.38782	4.67903	48.3662	1.77726e-152	1.38499e-150	338.351
CD109	3.38595	2.86886	23.205	1.68887e-71	1.35386e-70	151.894
WFDC3	3.37775	-1.3064	16.6499	1.0847e-45	4.2604e-45	92.7607
HOXC4	3.37663	-0.344318	26.2961	3.35959e-83	3.90455e-82	179.026
ISG15	3.3717	3.69051	21.6028	2.81292e-65	1.874e-64	137.477
PIGR	3.37092	6.16854	18.19	8.45396e-52	3.88259e-51	106.308
KRT7	3.36792	7.28467	24.2279	2.03092e-75	1.84082e-74	160.753
IFNE	3.36752	-3.31683	14.7674	2.69455e-38	8.78424e-38	75.8613
SDC1	3.36514	6.30231	37.4998	1.87275e-121	6.93768e-120	266.818
P4HA3	3.36108	0.799961	19.114	1.81925e-55	9.1477e-55	115.171
SULF2	3.35736	5.50925	44.2875	1.82562e-141	1.11941e-139	312.949
SNCAIP	3.35692	-0.0805975	21.035	4.72543e-63	2.95585e-62	132.65
PHACTR3	3.35401	0.557314	12.241	1.08058e-28	2.78842e-28	53.6676
CTSS	3.35002	5.28937	37.994	5.4843e-123	2.14546e-121	270.362
VSTM2L	3.34958	2.68231	14.3478	1.14214e-36	3.58478e-36	71.7719
PAX5	3.34347	-1.81025	12.0601	5.00171e-28	1.27123e-27	52.2386
TMEM26	3.34024	-1.30543	22.7379	1.07601e-69	8.16084e-69	147.974
CD3D	3.33911	0.0989711	20.0502	3.58172e-59	2.00167e-58	123.718
PBK	3.33787	-0.277028	21.3515	2.70795e-64	1.75447e-63	135.51
KCNS1	3.33727	-0.9062	19.0363	3.70032e-55	1.84639e-54	114.515
SMIM24	3.33653	2.57228	14.7243	3.9608e-38	1.28736e-37	75.1371
SLAMF9	3.33462	-3.4909	19.0711	2.69195e-55	1.34632e-54	114.931
CENPE	3.33269	0.635982	24.0117	1.35609e-74	1.20078e-73	159.197
SLC24A2	3.33051	-1.64199	16.7982	2.80762e-46	1.12144e-45	94.1291
MYEOV	3.32562	3.00974	14.7228	4.01566e-38	1.30497e-37	75.064
STPG4	3.32465	-3.26055	17.0346	3.25032e-47	1.332e-46	96.3478
SH2D1A	3.32436	-1.44161	19.0775	2.53916e-55	1.2712e-54	114.916
BIK	3.32312	1.72572	18.8768	1.58701e-54	7.78187e-54	112.935
CAPG	3.32231	5.72023	44.22	2.81822e-141	1.72263e-139	312.508
CDKN3	3.32206	0.0754891	24.6557	4.80458e-77	4.58875e-76	164.85
GPR132	3.32169	1.25832	25.8924	1.06899e-81	1.19075e-80	175.519
EPSTI1	3.31604	2.98807	29.0287	3.74769e-93	5.99385e-92	201.761
CD180	3.31359	0.305978	18.9654	7.07041e-55	3.49589e-54	113.834
SLC45A3	3.31329	2.82985	25.0021	2.35142e-78	2.34065e-77	167.684
MBOAT2	3.3128	3.77392	33.9922	3.3297e-110	8.89739e-109	240.985
SPATA12	3.31209	-3.23629	21.4396	1.22356e-64	8.00427e-64	136.409
ALPK2	3.30928	-0.481957	19.0328	3.81787e-55	1.9031e-54	114.468
ROS1	3.30917	-2.32924	14.9385	5.80693e-39	1.92645e-38	77.3542
CXCR4	3.30306	4.27413	25.9286	7.83056e-82	8.74233e-81	175.56
IRX5	3.30216	-1.44674	16.9371	7.90754e-47	3.20496e-46	95.3834
EVX1	3.29975	-4.1946	15.6125	1.33727e-41	4.75496e-41	83.4726
NPC1L1	3.29963	2.33497	14.0785	1.24958e-35	3.81129e-35	69.4217
GPR35	3.294	2.53213	18.9953	5.37884e-55	2.66963e-54	113.928
ARL9	3.29312	-2.23609	23.8018	8.61079e-74	7.39364e-73	157.433
GSDMA	3.29272	-2.30582	15.7986	2.47994e-42	8.96794e-42	85.0925
SPACA4	3.2895	-2.60553	17.5488	2.96816e-49	1.27767e-48	101.01
NCR3	3.28765	-3.27127	19.8881	1.56508e-58	8.5943e-58	122.367
E2F2	3.28738	-0.801453	21.1637	1.47664e-63	9.36849e-63	133.834
TSPAN8	3.28598	5.96214	27.2039	1.50225e-86	1.92087e-85	186.348
CYP2C9	3.28452	-0.401039	12.1491	2.35558e-28	6.03393e-28	52.9207
SLC22A3	3.28258	1.93998	19.1362	1.48576e-55	7.49971e-55	115.277
TRAT1	3.28207	-2.59841	18.1388	1.34936e-51	6.17105e-51	106.399
HK2	3.27689	4.30275	30.2101	2.47521e-97	4.50792e-96	211.272
MUC5B	3.27069	5.02347	12.8506	5.83419e-31	1.58517e-30	58.4152
CCNB2	3.26994	1.24069	21.8453	3.17296e-66	2.18224e-65	139.899
IGFL3	3.2686	-4.24422	15.9027	9.65717e-43	3.52876e-42	86.0945
ZIC2	3.26825	-3.05358	13.883	7.04433e-35	2.11168e-34	68.0099
FERMT1	3.26602	3.64685	31.0363	3.27586e-100	6.64687e-99	217.961
KLRB1	3.26593	-0.400901	20.1516	1.42396e-59	8.04062e-59	124.656
HLA-DPB1	3.26551	5.74896	32.4292	5.58566e-105	1.30221e-103	228.833
TTK	3.26499	-0.118008	21.8875	2.17298e-66	1.50242e-65	140.331
CRISP3	3.26377	1.93036	6.4397	4.19229e-10	6.8323e-10	11.1404
ARR3	3.26179	-3.98667	25.8162	2.05933e-81	2.26041e-80	175.004
FOXS1	3.25396	0.609835	20.5087	5.5562e-61	3.2656e-60	127.869
SIGLEC15	3.2538	-1.37547	17.9134	1.05927e-50	4.73799e-50	104.288
IL1RAPL2	3.25285	-4.05304	19.749	5.55402e-58	3.006e-57	121.119
EMB	3.2504	3.52557	34.2389	5.12403e-111	1.42976e-109	242.875
HLA-A	3.24977	8.688	32.1537	4.80788e-104	1.09606e-102	226.818
CAMK2N1	3.24927	4.88689	42.2303	1.24142e-135	6.93777e-134	299.518
SPC24	3.24921	0.15851	20.4967	6.19486e-61	3.63551e-60	127.771
GZMA	3.24878	0.0926198	20.7044	9.42665e-62	5.6699e-61	129.656
CRYM	3.24727	-1.58906	20.5753	3.03753e-61	1.80043e-60	128.543
VGLL1	3.24635	-0.536251	13.8832	7.02932e-35	2.1075e-34	67.8974
LRRIQ4	3.24602	-4.25204	19.0713	2.68671e-55	1.34404e-54	114.948
GUCY2C	3.24538	-0.969593	18.0054	4.57028e-51	2.06264e-50	105.11
IL11	3.24494	-0.811797	16.9487	7.11584e-47	2.89067e-46	95.4638
AMN	3.24399	1.9225	11.888	2.13179e-27	5.34381e-27	50.5798
AKR1C4	3.24063	-3.02852	15.8944	1.04143e-42	3.79972e-42	85.9901
FAM184B	3.23721	-3.76893	23.3768	3.68283e-72	3.00026e-71	153.721
DUOXA1	3.23619	-0.240269	15.7737	3.10749e-42	1.12124e-41	84.7771
S100A4	3.23518	5.0708	23.4246	2.41055e-72	1.97529e-71	153.632
MTRNR2L12	3.23096	-2.38762	20.9733	8.25427e-63	5.12551e-62	132.176
TNFSF15	3.23023	0.390618	22.3662	2.97408e-68	2.15855e-67	144.611
PDE6G	3.22969	-2.46531	19.4877	6.01324e-57	3.17375e-56	118.697
HTR1B	3.22597	-2.94063	17.9946	5.04203e-51	2.27292e-50	105.095
MFAP5	3.22182	2.95345	16.4795	5.11596e-45	1.9749e-44	90.9197
KRT23	3.21977	2.48413	12.8435	6.20368e-31	1.68487e-30	58.6212
CKS2	3.21675	1.61516	23.9032	3.52431e-74	3.06517e-73	158.179
NT5DC4	3.21182	-3.77278	20.7283	7.58665e-62	4.5815e-61	130.002
KRT79	3.21069	-3.52377	18.6669	1.08048e-53	5.18247e-53	111.248
TMEM40	3.20226	-2.72323	14.6358	8.74551e-38	2.8163e-37	74.6685
TYRP1	3.20201	-2.69148	17.4018	1.13739e-48	4.82067e-48	99.6777
CCL13	3.20197	-1.08517	15.0421	2.28966e-39	7.68195e-39	78.2279
AMTN	3.20125	-4.50273	16.0239	3.21844e-43	1.19026e-42	87.1899
IL4I1	3.19869	0.628889	19.3041	3.2088e-56	1.6543e-55	116.913
IGFBP5	3.19833	8.06966	21.657	1.72582e-65	1.15805e-64	137.936
PKM	3.19731	8.81862	36.5591	1.68308e-118	5.77983e-117	260.136
TNFRSF17	3.19595	-2.92473	16.0408	2.75945e-43	1.02225e-42	87.3134
S100A10	3.19265	6.92244	39.7	3.47358e-128	1.58007e-126	282.35
GPR68	3.18943	1.55791	23.2993	7.31418e-72	5.90203e-71	152.848
PRRX2	3.18834	0.597063	17.0501	2.8213e-47	1.15837e-46	96.3434
GJB6	3.18376	-2.10607	13.3842	5.64439e-33	1.60939e-32	63.601
TGFBI	3.1834	5.85784	27.6314	4.11347e-88	5.52606e-87	189.945
SERPINA1	3.18289	8.2402	17.1167	1.53648e-47	6.34977e-47	96.6285
WFDC2	3.17928	4.25134	20.361	2.12414e-60	1.2267e-59	126.174
SMCO2	3.173	-2.74501	19.6415	1.47931e-57	7.90581e-57	120.108
DIO2	3.17272	2.3204	20.3613	2.11755e-60	1.22325e-59	126.385
TIMD4	3.17106	-3.45983	16.8	2.76116e-46	1.10311e-45	94.2236
TRIM54	3.16912	0.380181	12.4808	1.39991e-29	3.69531e-29	55.7107
FBN2	3.16873	-0.863128	17.5972	1.90761e-49	8.24958e-49	101.383
IGSF6	3.16682	1.49417	21.205	1.0162e-63	6.47666e-63	134.107
TMC7	3.16245	1.87388	19.2595	4.82181e-56	2.46897e-55	116.404
ITIH2	3.15934	-0.406362	14.9628	4.66718e-39	1.55255e-38	77.4882
ANXA8L1	3.15687	-0.422308	13.4885	2.26692e-33	6.52841e-33	64.4337
GZMH	3.15609	-1.37562	18.7467	5.20992e-54	2.5218e-53	111.898
GEM	3.15329	3.60812	23.3896	3.28662e-72	2.68083e-71	153.44
CEACAM18	3.15274	-4.50919	13.9018	5.96502e-35	1.79115e-34	68.2072
HOXA1	3.15064	-1.84575	22.9163	2.19504e-70	1.69703e-69	149.586
CHRNA1	3.15061	-2.64136	17.5217	3.80052e-49	1.63237e-48	100.772
CELSR1	3.14665	3.59808	31.3652	2.39868e-101	4.99129e-100	220.577
F2R	3.14611	4.44519	31.8523	5.12024e-103	1.12657e-101	224.361
MOXD1	3.14563	3.18912	21.547	4.64734e-65	3.07101e-64	137.017
MROH6	3.14436	2.83676	18.0645	2.66283e-51	1.20959e-50	105.383
BMP7	3.14045	0.402833	14.4456	4.77647e-37	1.51162e-36	72.8474
ANXA1	3.13891	6.0387	30.657	6.79138e-99	1.30491e-97	214.798
C16orf54	3.13312	0.0584323	16.9269	8.67697e-47	3.51245e-46	95.2416
PROC	3.13164	-0.360103	20.0751	2.85564e-59	1.59955e-58	123.96
H2AC13	3.13147	-4.34032	18.8199	2.66991e-54	1.30103e-53	112.655
ENKUR	3.13046	-2.08682	20.0105	5.13973e-59	2.85849e-58	123.441
ALG1L2	3.12841	-3.33957	20.8699	2.10436e-62	1.29276e-61	131.274
STAC	3.12523	-0.887823	18.3309	2.32964e-52	1.08702e-51	108.084
DRAXIN	3.12423	-2.1749	22.8955	2.64193e-70	2.0369e-69	149.413
XCR1	3.12376	-2.26453	15.8234	1.98157e-42	7.18166e-42	85.3225
SIT1	3.1223	-1.25741	18.3202	2.5703e-52	1.19788e-51	108.001
PSAPL1	3.12099	-2.39506	10.7048	3.57524e-23	8.13443e-23	41.1604
COL7A1	3.11992	3.76151	18.541	3.41452e-53	1.62107e-52	109.628
LY6E	3.11753	6.46077	30.8458	1.49881e-99	2.94049e-98	216.318
HLA-G	3.11711	0.59733	15.4439	6.13405e-41	2.14983e-40	81.7777
DCHS2	3.1166	-1.52634	17.9607	6.87287e-51	3.08829e-50	104.732
PPARG	3.11296	2.86194	22.2892	5.92209e-68	4.25399e-67	143.713
SLC5A1	3.11081	3.2407	18.3546	1.87688e-52	8.77225e-52	107.987
FCRL2	3.11073	-2.84053	13.4299	3.78637e-33	1.08499e-32	64.0382
ABCB4	3.10792	-0.882835	25.4561	4.59301e-80	4.80424e-79	171.829
ADAMTS6	3.10755	-0.104547	23.1624	2.46444e-71	1.96673e-70	151.716
FBN1	3.10727	5.84798	27.5265	9.92401e-88	1.31871e-86	189.062
CCL4L2	3.10713	-1.0731	17.6854	8.51533e-50	3.72617e-49	102.198
SLC16A4	3.10554	2.00406	20.4881	6.69926e-61	3.92328e-60	127.566
SAPCD2	3.10377	1.05891	17.6388	1.30379e-49	5.66841e-49	101.684
RETN	3.10208	-2.11708	13.5419	1.41863e-33	4.10905e-33	64.9816
GZMB	3.09668	-0.967815	17.4322	8.60839e-49	3.66362e-48	99.884
ATP2C2	3.09381	1.92171	15.552	2.30943e-41	8.16418e-41	82.6319
BMP4	3.09158	3.02867	21.1546	1.60283e-63	1.01559e-62	133.488
LTBP1	3.08852	4.89591	32.1578	4.6537e-104	1.06215e-102	226.728
ADAM28	3.08805	4.0309	26.3733	1.73697e-83	2.03079e-82	179.376
PPP1R14C	3.08696	1.07707	16.8946	1.16589e-46	4.70978e-46	94.8939
BASP1	3.0854	3.04754	25.756	3.4565e-81	3.74982e-80	174.178
XKR5	3.08208	-4.37696	21.428	1.35848e-64	8.878e-64	136.323
AP001931.1	3.0814	-4.26464	20.6019	2.38571e-61	1.41967e-60	128.862
F2RL2	3.08003	1.82932	15.5709	1.94798e-41	6.89512e-41	82.8111
CLSPN	3.07769	-0.822238	21.6256	2.29044e-65	1.53113e-64	138.005
KLK4	3.0757	-3.58986	15.7699	3.21761e-42	1.16033e-41	84.8862
NCAPG	3.07469	0.650665	21.1725	1.36368e-63	8.65462e-63	133.874
CPXM1	3.07224	3.12518	19.1395	1.44211e-55	7.28694e-55	115.165
NINJ2	3.07145	0.642951	27.086	4.06789e-86	5.1202e-85	185.724
UTS2	3.06951	-4.20894	17.9345	8.73558e-51	3.91899e-50	104.577
GUCA1A	3.06822	-4.26924	19.4092	1.23039e-56	6.44864e-56	118.027
ASPHD2	3.06525	1.64975	19.3819	1.57867e-56	8.23434e-56	117.539
MCHR1	3.0649	-3.69091	19.2163	7.14829e-56	3.64496e-55	116.266
SLC13A2	3.06364	-2.21971	11.5939	2.48996e-26	6.08642e-26	48.3809
SPTSSB	3.06103	0.82469	14.7855	2.29082e-38	7.47431e-38	75.8546
CDH2	3.05634	1.32845	15.0333	2.47907e-39	8.30603e-39	78.0281
CD40LG	3.05586	-2.4	17.4187	9.74517e-49	4.14111e-48	99.8251
TP63	3.05525	-0.759261	15.4419	6.24442e-41	2.18734e-40	81.8094
PPEF1	3.05257	-1.58085	20.1879	1.02368e-59	5.80047e-59	125.033
WFDC10B	3.0523	-4.39044	19.0992	2.0829e-55	1.04573e-54	115.202
USH1C	3.05162	3.98085	23.9161	3.14627e-74	2.74247e-73	158.045
KCND2	3.05042	0.0894387	20.0897	2.49932e-59	1.40318e-58	124.085
CCL5	3.04907	2.58767	19.3685	1.78414e-56	9.27148e-56	117.313
CENPI	3.04841	-0.997387	23.7969	8.99455e-74	7.70623e-73	157.354
FCRL5	3.04672	-0.919335	13.0118	1.44534e-31	3.98294e-31	60.3205
ZNF860	3.04586	-0.848524	22.518	7.65482e-69	5.66509e-68	146.005
RUNX1	3.04578	5.0609	37.7658	2.79015e-122	1.06178e-120	268.724
BPI	3.04252	-2.69506	18.2346	5.62167e-52	2.59584e-51	107.282
APLNR	3.04024	2.97453	18.7948	3.35718e-54	1.63187e-53	112.032
CDKN2A	3.0396	0.65609	10.3241	7.39781e-22	1.63634e-21	38.0122
LGALS3BP	3.03358	7.70402	37.1123	3.04371e-120	1.08443e-118	264.08
DIAPH3	3.03352	0.214347	21.9233	1.5753e-66	1.09111e-65	140.65
FGF5	3.0335	-3.89825	16.8813	1.31616e-46	5.31025e-46	94.9743
TIFAB	3.03032	-3.71702	15.9157	8.58828e-43	3.14229e-42	86.2084
COL6A5	3.02745	-3.81976	14.9006	8.15768e-39	2.6999e-38	77.0757
GPC6	3.02715	2.37501	20.5199	5.02071e-61	2.95531e-60	127.811
BAIAP2L2	3.02671	2.84863	15.897	1.01691e-42	3.71373e-42	85.634
CD86	3.02586	1.54865	20.5973	2.48854e-61	1.48041e-60	128.599
MGLL	3.02181	5.55545	39.4931	1.45616e-127	6.48806e-126	280.885
PODNL1	3.0217	1.46464	18.8027	3.12403e-54	1.51929e-53	112.273
CD3G	3.01996	-0.646005	19.2805	3.98174e-56	2.04686e-55	116.743
RAB31	3.01915	5.03206	32.751	4.57532e-106	1.10622e-104	231.345
WT1	3.01404	-1.2811	14.6385	8.53923e-38	2.75033e-37	74.6333
DRC1	3.01158	-3.4772	16.6703	9.00861e-46	3.54901e-45	93.0471
CMTM3	3.01152	4.13513	31.7704	9.75731e-103	2.11824e-101	223.729
ANKRD55	3.00713	-3.79663	18.7182	6.76299e-54	3.26305e-53	111.726
TNFRSF11B	3.00445	1.83649	14.3588	1.03567e-36	3.25215e-36	71.9488
ALDH3B2	3.00407	-0.762213	13.7364	2.5675e-34	7.59533e-34	66.6211
MSX2	3.00384	0.286739	17.3678	1.55093e-48	6.5521e-48	99.2545
TMEM200A	3.00378	2.13863	20.5618	3.43359e-61	2.02904e-60	128.215
F5	2.99779	3.0157	14.0968	1.0623e-35	3.25021e-35	69.4853
AIM2	2.99538	-1.58496	16.1743	8.21431e-44	3.07683e-43	88.4684
SPRR1A	2.99095	-2.36848	10.6995	3.72907e-23	8.47851e-23	41.12
PRR5L	2.9891	2.30226	28.7293	4.414e-92	6.80361e-91	199.341
TREM2	2.98619	1.94775	18.0362	3.44803e-51	1.56047e-50	105.22
MARCKSL1	2.98262	5.73207	38.7629	2.38846e-125	1.00469e-123	275.774
METTL11B	2.98225	-4.57069	17.0546	2.70764e-47	1.1124e-46	96.5509
APOE	2.98141	5.62223	21.8347	3.49203e-66	2.39832e-65	139.401
PKIA	2.98066	0.96268	21.2751	5.39966e-64	3.46741e-63	134.78
UGT1A1	2.97735	-3.72552	12.6465	3.38293e-30	9.05077e-30	57.3033
CD55	2.97527	5.70541	31.2672	5.21779e-101	1.07772e-99	219.661
ARNTL2	2.97288	3.05319	26.8476	3.06481e-85	3.75065e-84	183.505
FSCN1	2.97013	4.6458	31.6197	3.2015e-102	6.82894e-101	222.496
NR1I2	2.96484	0.602655	10.0554	6.07581e-21	1.31304e-20	35.9251
TPRG1	2.95844	0.664205	17.763	4.18945e-50	1.84896e-49	102.845
TCF23	2.95835	-3.55063	15.3534	1.38815e-40	4.81762e-40	81.134
BTLA	2.9569	-2.30201	16.4918	4.57489e-45	1.76813e-44	91.3859
OSM	2.95644	-0.198548	15.2722	2.8856e-40	9.92132e-40	80.2648
BST2	2.95508	5.06264	31.4545	1.18248e-101	2.49508e-100	221.165
PSMB9	2.9547	3.50979	32.0865	8.13756e-104	1.84439e-102	226.265
COL6A3	2.95419	8.73716	20.0526	3.50298e-59	1.95879e-58	123.464
NUSAP1	2.95174	2.1275	24.8668	7.62517e-78	7.51377e-77	166.561
MMP14	2.95047	7.57246	33.3243	5.47874e-108	1.38994e-106	235.823
TMIGD2	2.94991	-2.92188	19.1378	1.46357e-55	7.39154e-55	115.533
CYSLTR2	2.94829	-1.31408	22.8681	3.37254e-70	2.591e-69	149.144
RAD54L	2.94799	-0.587999	19.9048	1.34526e-58	7.40384e-58	122.425
CRTAM	2.94544	-2.00238	19.8422	2.37849e-58	1.30135e-57	121.913
KLF5	2.94517	5.34087	34.368	1.93152e-111	5.45961e-110	243.715
AGRP	2.94512	-4.01882	18.0559	2.87907e-51	1.30539e-50	105.685
C3orf80	2.9443	-0.459618	22.7555	9.19382e-70	6.98103e-69	148.113
CCDC33	2.94064	-4.03169	17.3444	1.92052e-48	8.089e-48	99.1945
LGALS1	2.93904	6.28281	31.9057	3.3634e-103	7.47592e-102	224.717
CD48	2.93851	1.48633	14.8725	1.05033e-38	3.46565e-38	76.5661
LRRC55	2.93673	-1.07536	14.9509	5.19534e-39	1.72531e-38	77.4179
GDA	2.93578	3.14907	19.1883	9.23179e-56	4.68414e-55	115.599
ALPI	2.93529	-4.24901	12.9248	3.07185e-31	8.39649e-31	59.6946
IL21R	2.93514	-0.47981	19.2672	4.49249e-56	2.30336e-55	116.618
PTK6	2.93374	3.41168	18.0718	2.48946e-51	1.13162e-50	105.364
RUNX2	2.93149	2.33104	24.0117	1.35683e-74	1.20089e-73	159.054
H3C4	2.93122	-3.37223	15.887	1.11393e-42	4.06124e-42	85.942
CENPK	2.93086	0.0235411	22.546	5.96168e-69	4.42376e-68	146.231
SDK2	2.92808	-0.151177	20.1787	1.11316e-59	6.30201e-59	124.904
NIPAL4	2.92739	-2.7463	14.4877	3.28116e-37	1.04238e-36	73.3613
LY86	2.92575	0.951693	19.111	1.87033e-55	9.40212e-55	115.13
ANXA2	2.92543	9.19361	29.9763	1.64033e-96	2.94086e-95	209.491
NPR3	2.9195	2.27941	14.9842	3.85351e-39	1.28494e-38	77.4717
CSF2RA	2.91916	1.45067	19.9827	6.61529e-59	3.66766e-58	123.025
SERPINB3	2.91793	-1.46794	9.35439	1.28591e-18	2.62936e-18	30.704
EPHX3	2.91704	-1.0096	15.4299	6.96279e-41	2.43395e-40	81.7168
HLA-DPA1	2.91586	5.88499	25.7252	4.50558e-81	4.87709e-80	173.706
HTR2B	2.91357	-0.545273	17.555	2.80362e-49	1.2077e-48	100.994
TREML2	2.91332	-2.59699	15.184	6.39045e-40	2.17424e-39	79.5806
CLEC17A	2.90204	-3.32588	13.7594	2.09567e-34	6.20703e-34	66.9456
DRD1	2.90116	-2.13816	14.3859	8.13719e-37	2.56219e-36	72.4291
PRR15	2.89679	2.70001	21.3569	2.581e-64	1.67278e-63	135.339
MCEMP1	2.89678	-0.551394	12.8769	4.64774e-31	1.2651e-30	59.1446
TGM2	2.89387	7.32404	19.7682	4.66411e-58	2.53135e-57	120.751
SHISAL2A	2.89077	-2.18516	18.9982	5.23916e-55	2.60162e-54	114.234
MYO7B	2.88777	2.51085	11.1441	1.01647e-24	2.3992e-24	44.3484
TNFRSF13C	2.88698	-0.648231	13.2119	2.54024e-32	7.12666e-32	62.0435
LILRB4	2.88681	1.81801	18.1258	1.51985e-51	6.94262e-51	106.048
RGS10	2.8852	2.53237	34.3952	1.57196e-111	4.46263e-110	244.12
HAPLN3	2.88496	2.69631	24.3316	8.18095e-76	7.52678e-75	161.822
RNF183	2.8813	-0.307564	15.2586	3.26361e-40	1.11974e-39	80.146
RAD51	2.87748	0.198417	22.193	1.40159e-67	9.97282e-67	143.071
BTBD16	2.87263	-1.5712	15.5976	1.52932e-41	5.43191e-41	83.2542
VWA3B	2.87258	-2.13291	16.0752	2.01909e-43	7.51253e-43	87.5999
RAB33A	2.86849	-1.79694	21.3121	3.86537e-64	2.49116e-63	135.222
BANK1	2.8676	1.2195	17.4088	1.06665e-48	4.52476e-48	99.5632
POU2F3	2.86595	0.745432	14.8387	1.42144e-38	4.66657e-38	76.3357
ATP10A	2.86586	2.18828	19.1012	2.045e-55	1.02723e-54	114.915
OXTR	2.86358	-0.0625858	17.7869	3.36904e-50	1.49058e-49	103.094
CCDC190	2.86198	-4.3	13.0848	7.67748e-32	2.13433e-31	61.075
CD2	2.8606	1.36744	16.5501	2.69005e-45	1.0469e-44	91.7256
OR2I1P	2.85513	1.35761	12.3111	5.95483e-29	1.54724e-28	54.191
SH3KBP1	2.85175	4.20478	51.7326	4.71607e-161	4.23149e-159	358.11
UHRF1	2.85143	0.972453	21.022	5.31572e-63	3.3166e-62	132.492
HOXB6	2.85093	1.65418	16.4446	7.02906e-45	2.70274e-44	90.7373
ARL4C	2.84861	4.72701	32.5894	1.60452e-105	3.82738e-104	230.092
GZMK	2.84608	-0.45014	14.6605	7.01399e-38	2.26542e-37	74.7997
ESCO2	2.84406	-0.461248	21.4234	1.41669e-64	9.25222e-64	136.177
EGLN3	2.84145	3.64685	17.6365	1.33177e-49	5.78745e-49	101.355
COL24A1	2.84144	-0.921526	16.4787	5.15714e-45	1.9904e-44	91.2069
LAPTM5	2.83971	5.77912	25.9297	7.75922e-82	8.66763e-81	175.463
TNFRSF13B	2.83846	-3.46468	13.2495	1.82996e-32	5.15243e-32	62.4978
RHOH	2.83831	0.620151	16.9758	5.55399e-47	2.26137e-46	95.6679
TERT	2.83678	-4.4391	15.7581	3.58003e-42	1.28984e-41	84.7861
DGKI	2.83621	-1.15685	22.119	2.72142e-67	1.92031e-66	142.452
CACNG8	2.83254	-2.25736	14.2485	2.76165e-36	8.57018e-36	71.2178
C9orf50	2.82968	-3.57933	19.2264	6.52151e-56	3.33144e-55	116.359
UNC93A	2.82503	-4.26856	14.9793	4.02526e-39	1.3413e-38	77.7816
HLA-DOA	2.82458	3.11412	19.7496	5.52599e-58	2.99248e-57	120.713
CDKN2B	2.82075	2.80696	19.4024	1.3091e-56	6.85384e-56	117.584
PTAFR	2.82042	3.08459	28.5048	2.82677e-91	4.21429e-90	197.399
LAMA4	2.81769	4.66577	33.2447	1.01076e-107	2.54774e-106	235.166
IL1R2	2.81302	1.72551	11.743	7.18178e-27	1.77885e-26	49.3768
FCHO1	2.81273	1.51189	21.1056	2.49494e-63	1.57473e-62	133.198
C11orf53	2.81145	-1.09081	14.9033	7.96221e-39	2.63566e-38	76.9936
BEND6	2.8089	-0.610795	21.2748	5.41474e-64	3.47596e-63	134.844
KIF15	2.80574	0.22297	23.022	8.57392e-71	6.72437e-70	150.468
CXCL8	2.80495	2.96304	13.4749	2.5524e-33	7.33973e-33	64.0128
ESPL1	2.80403	0.729161	19.2231	6.72038e-56	3.43165e-55	116.169
AK4	2.80345	2.77801	18.9151	1.11847e-54	5.50649e-54	113.14
FCRL1	2.80286	-3.21296	11.0297	2.58557e-24	6.04083e-24	43.8178
SLC24A3	2.80235	2.14373	24.2835	1.2467e-75	1.13951e-74	161.456
SLC7A3	2.80226	-4.07705	17.4374	8.21471e-49	3.4976e-48	100.043
LGALS9C	2.80135	-2.88072	13.843	1.00263e-34	2.99504e-34	67.6664
FGF1	2.80057	0.616657	21.1089	2.42144e-63	1.52884e-62	133.303
MXRA5	2.80048	6.13407	20.7758	4.93284e-62	2.99275e-61	129.835
PIWIL1	2.79895	-3.39369	12.0553	5.21035e-28	1.32305e-27	52.2853
TBXAS1	2.79862	2.98574	24.3969	4.61555e-76	4.2726e-75	162.359
PLEK2	2.79759	3.63643	23.0288	8.07656e-71	6.34702e-70	150.204
KCNK1	2.79746	3.81857	28.0455	1.28713e-89	1.81255e-88	193.501
SPN	2.79451	1.72333	17.9886	5.32622e-51	2.40048e-50	104.801
THEM5	2.79306	-2.02585	19.1716	1.0757e-55	5.4453e-55	115.81
PI15	2.79179	0.970608	13.2225	2.31669e-32	6.50228e-32	62.0514
CEACAM3	2.79136	-3.03147	16.8574	1.63644e-46	6.5794e-46	94.7416
CST7	2.79105	0.644886	18.6765	9.90184e-54	4.75522e-53	111.187
MYOF	2.78851	5.96626	40.4646	1.8108e-130	8.92172e-129	287.573
CLEC2L	2.78563	-3.21457	16.6516	1.06773e-45	4.19541e-45	92.8753
SLITRK3	2.7832	-2.47449	14.9665	4.51831e-39	1.50354e-38	77.6276
BCAN	2.78273	-1.32174	18.4903	5.42696e-53	2.56218e-52	109.565
KIF11	2.77781	1.90939	23.6638	2.90865e-73	2.46077e-72	156.025
CCR3	2.77691	-4.09425	16.4008	1.04704e-44	4.0055e-44	90.6096
GPR183	2.77607	1.87457	16.3743	1.33289e-44	5.09205e-44	90.067
TMEM52B	2.77475	-2.16435	16.938	7.84379e-47	3.18044e-46	95.4426
BST1	2.77268	1.26478	21.6977	1.19706e-65	8.07675e-65	138.558
SLC16A1	2.77095	3.44408	29.544	5.50811e-95	9.44247e-94	205.909
SP140	2.77075	0.187242	17.7564	4.45142e-50	1.9628e-49	102.811
VDR	2.77038	3.72564	40.2997	5.59511e-130	2.70892e-128	286.533
RSPO2	2.76764	-3.90371	14.8699	1.07504e-38	3.54539e-38	76.8041
PLD4	2.7644	0.410138	17.7829	3.49451e-50	1.54574e-49	103.042
SLC9A3	2.76355	0.173582	10.5384	1.3531e-22	3.04354e-22	39.7288
CLDN2	2.75909	4.5281	12.5649	6.8182e-30	1.81152e-29	55.9645
MST1R	2.75595	4.2849	26.3754	1.70606e-83	1.99584e-82	179.342
SERPINE1	2.7556	6.06713	17.4826	5.43566e-49	2.32447e-48	99.8057
OBP2A	2.75425	-4.45428	17.3128	2.56299e-48	1.07695e-47	98.9039
ITGB2	2.75192	4.92654	24.4488	2.93109e-76	2.7288e-75	162.63
SLC6A6	2.75007	4.95217	32.0971	7.48864e-104	1.69928e-102	226.226
GPNMB	2.75004	5.60325	24.5162	1.62533e-76	1.52843e-75	163.195
EFNB2	2.74388	4.55249	41.1469	1.75662e-132	9.04197e-131	292.246
RXFP4	2.74386	-3.21851	15.3908	9.90427e-41	3.44957e-40	81.4654
CDH13	2.7436	1.01217	18.4858	5.6542e-53	2.66883e-52	109.415
CEACAM7	2.74249	2.36304	7.93473	3.25971e-14	5.94831e-14	20.3692
PDLIM4	2.74233	3.24191	23.0413	7.22165e-71	5.68432e-70	150.36
SAMD9	2.7405	3.81735	29.2939	4.25426e-94	7.06995e-93	203.826
XIRP1	2.73328	-0.743839	12.6377	3.6505e-30	9.75728e-30	57.1043
MAB21L2	2.73281	-1.19706	11.7816	5.19947e-27	1.29227e-26	49.8985
HAS1	2.73267	-1.61352	10.612	7.51758e-23	1.70111e-22	40.3959
SGCD	2.73213	1.85542	16.7154	5.9724e-46	2.36622e-45	93.1682
CALHM6	2.73202	-0.0216807	18.5299	3.7805e-53	1.79221e-52	109.881
CCDC170	2.73064	-0.191495	19.8257	2.76265e-58	1.50858e-57	121.701
IL12RB1	2.73054	0.191406	21.5549	4.32885e-65	2.86248e-64	137.346
HOXA3	2.72948	1.21176	19.1966	8.55932e-56	4.34971e-55	115.885
HMCN1	2.72814	2.72089	16.2471	4.23827e-44	1.59947e-43	88.8071
PPP1R3G	2.72754	-0.637234	19.1726	1.06596e-55	5.39742e-55	115.763
IL17B	2.72697	-4.07619	19.3759	1.6671e-56	8.68171e-56	117.725
CAMK4	2.72643	0.91751	20.5951	2.53897e-61	1.50949e-60	128.63
GRIK4	2.72641	-3.72454	17.8033	2.89936e-50	1.28393e-49	103.38
PFKP	2.72355	5.27719	36.1582	3.15209e-117	1.045e-115	257.048
TASL	2.72193	-0.783188	18.7578	4.70906e-54	2.28219e-53	111.989
SGPP2	2.71946	3.64261	25.0272	1.88978e-78	1.88881e-77	167.783
GNG8	2.71866	-4.67364	22.188	1.46565e-67	1.04172e-66	143.143
CAPN5	2.71859	5.0666	29.6223	2.91134e-95	5.03055e-94	206.413
PTGER2	2.71844	1.16528	20.8054	3.77238e-62	2.29868e-61	130.514
PIK3CG	2.71584	0.405077	17.8235	2.40971e-50	1.07025e-49	103.415
LY9	2.7152	-0.758062	16.2631	3.66323e-44	1.38513e-43	89.2481
VAV1	2.71505	2.18207	20.6511	1.52816e-61	9.13814e-61	129.006
CA14	2.71457	-1.50292	18.0331	3.54616e-51	1.60339e-50	105.4
ZNF888	2.71454	-1.83884	20.3838	1.72734e-60	1.0002e-59	126.831
TLR7	2.71279	-0.123851	16.6461	1.12301e-45	4.40996e-45	92.7044
IL2RB	2.71197	1.37089	18.4367	8.86075e-53	4.17027e-52	108.929
EMP3	2.71031	3.66659	29.7414	1.10411e-95	1.92481e-94	207.492
FYB1	2.70981	2.43443	17.2094	6.59094e-48	2.7447e-47	97.5984
MS4A1	2.70972	-0.624088	8.0672	1.32248e-14	2.44057e-14	21.5349
COTL1	2.70923	5.8457	40.0168	3.90265e-129	1.82186e-127	284.492
CD1B	2.70824	-3.95539	15.4232	7.39257e-41	2.58074e-40	81.7702
CXorf65	2.7078	-3.25937	16.6724	8.83612e-46	3.48176e-45	93.0671
CDCA8	2.70739	1.38077	19.8854	1.60443e-58	8.80544e-58	122.141
C1QA	2.70675	5.0603	24.333	8.07832e-76	7.43936e-75	161.603
SLITRK6	2.7059	-0.75755	13.4165	4.25731e-33	1.21851e-32	63.8346
MEI1	2.70559	-0.184694	22.2095	1.20881e-67	8.61363e-67	143.234
PRSS51	2.70405	-2.24703	13.1338	5.01319e-32	1.39783e-31	61.4482
SYT13	2.70153	4.29167	21.3157	3.74118e-64	2.41271e-63	134.779
KIF18A	2.70115	-0.377028	20.7796	4.76705e-62	2.89396e-61	130.363
HLA-DOB	2.70075	-0.11361	15.8353	1.77911e-42	6.45748e-42	85.3479
SYTL2	2.70018	3.93785	29.2699	5.17688e-94	8.58134e-93	203.614
XKR9	2.69983	-0.392956	13.5834	9.8544e-34	2.86919e-33	65.2772
S100A3	2.69972	-0.698638	18.9662	7.01283e-55	3.46917e-54	113.885
OSBPL10	2.69916	3.18218	33.6751	3.73029e-109	9.70273e-108	238.583
HLA-C	2.69856	8.73417	26.3931	1.46688e-83	1.71706e-82	179.61
ADRB3	2.69726	-4.12941	16.6638	9.55442e-46	3.76177e-45	92.9983
TMEM130	2.69508	0.952564	15.9619	5.64652e-43	2.07566e-42	86.427
HOXB5	2.69385	1.2161	18.633	1.4724e-53	7.03988e-53	110.74
CCL8	2.69369	-2.5317	13.7602	2.08084e-34	6.16499e-34	66.9287
RIBC2	2.69319	-1.87104	17.244	4.80598e-48	2.00608e-47	98.218
BMP3	2.69199	-2.27761	13.6902	3.8547e-34	1.13483e-33	66.303
NKAIN3	2.69192	-4.51608	18.5743	2.51912e-53	1.19859e-52	110.412
PAQR8	2.69047	3.16231	22.6986	1.52651e-69	1.15373e-68	147.315
PDLIM7	2.68917	5.22385	31.9906	1.72676e-103	3.87777e-102	225.372
CCR7	2.6888	0.355875	11.7156	9.03305e-27	2.23202e-26	49.2824
REN	2.6872	-3.60119	15.2576	3.2923e-40	1.12899e-39	80.2783
GDNF	2.68575	-2.35256	16.2151	5.6661e-44	2.13092e-43	88.8838
GBP2	2.68571	4.79552	38.0474	3.7512e-123	1.47633e-121	270.724
TMEM132E	2.68461	-1.59131	19.0807	2.46656e-55	1.23517e-54	114.967
C2	2.68444	2.50166	20.8142	3.48437e-62	2.12517e-61	130.447
RAB42	2.68241	-0.0139445	23.8142	7.71674e-74	6.63179e-73	157.488
BRINP1	2.68058	-2.16439	17.4801	5.55874e-49	2.37659e-48	100.385
FABP3	2.67827	0.783812	20.7001	9.79429e-62	5.88741e-61	129.593
CENPW	2.67745	0.592439	22.881	3.00735e-70	2.31681e-69	149.198
GPR85	2.6754	-1.24041	21.7381	8.32353e-66	5.64718e-65	139.041
ACTA2	2.67402	6.90005	21.6683	1.5593e-65	1.04919e-64	137.929
RUNX3	2.67265	1.94936	17.1955	7.48064e-48	3.1119e-47	97.5295
CORIN	2.6723	0.878124	15.1596	7.95971e-40	2.6997e-39	79.1974
AHR	2.67226	5.53066	41.4772	1.89795e-133	9.97956e-132	294.436
RP1	2.67054	-4.42785	14.4136	6.35597e-37	2.00585e-36	72.7329
FPR3	2.66699	2.16852	15.6877	6.7715e-42	2.42584e-41	83.8047
LYPD5	2.66644	-0.231459	22.1147	2.82639e-67	1.99222e-66	142.388
SIGLEC12	2.66606	-1.49296	11.8658	2.56801e-27	6.42413e-27	50.6167
SLAMF6	2.66599	0.685212	15.0919	1.46391e-39	4.93947e-39	78.6069
HTR2A	2.66497	-2.8863	15.7239	4.87797e-42	1.75295e-41	84.4609
GLI2	2.66472	1.77669	23.4706	1.60435e-72	1.32465e-71	154.327
IGF2BP3	2.66456	-0.0508446	9.71972	8.10112e-20	1.70862e-19	33.3938
PRRX1	2.66299	3.80567	20.8567	2.37076e-62	1.45413e-61	130.677
CDC20B	2.66064	-4.18284	17.0964	1.8482e-47	7.62514e-47	96.9348
ZBTB7C	2.66021	2.04822	17.3534	1.76901e-48	7.46315e-48	98.9589
NTS	2.65917	-3.15806	10.5587	1.15106e-22	2.59356e-22	40.0483
SERPINH1	2.65415	6.52103	30.0385	9.91059e-97	1.78172e-95	209.8
NUGGC	2.6514	-2.17802	16.1973	6.6642e-44	2.50291e-43	88.7161
GAPDH	2.65104	9.77615	27.3887	3.16397e-87	4.13408e-86	188.138
ITGAD	2.65033	-3.45026	15.8364	1.76083e-42	6.3947e-42	85.494
ITGA3	2.64973	6.87672	28.8144	2.18676e-92	3.41911e-91	199.806
CDHR5	2.64887	2.76938	12.8857	4.30698e-31	1.17299e-30	58.9082
TMEM82	2.64629	-3.93954	13.3926	5.247e-33	1.49805e-32	63.7507
CACNG4	2.64587	0.624126	9.89711	2.07299e-20	4.42515e-20	34.7058
NEFL	2.64566	-1.49379	15.1183	1.15368e-39	3.90211e-39	78.948
SERPINE2	2.64459	3.82992	20.0195	4.7338e-59	2.63573e-58	123.073
MIXL1	2.64288	-4.17039	18.0327	3.55993e-51	1.60925e-50	105.473
ST6GALNAC5	2.64267	0.388049	17.5645	2.5703e-49	1.10909e-48	101.052
SOX30	2.64191	-2.92085	17.1872	8.06721e-48	3.35163e-47	97.7454
LGALS3	2.64181	6.82773	34.5012	7.06864e-112	2.03927e-110	244.734
IFI44L	2.6415	3.10663	14.6124	1.078e-37	3.46576e-37	74.0263
COL14A1	2.6403	4.7684	18.0358	3.45969e-51	1.56539e-50	104.885
SCIN	2.63703	2.11633	14.9598	4.79776e-39	1.59545e-38	77.26
TNFRSF21	2.6363	5.81918	34.0495	2.15441e-110	5.82048e-109	241.279
CDT1	2.63532	1.0712	16.5157	3.68187e-45	1.4258e-44	91.44
AP1S3	2.63282	2.01417	20.9741	8.19199e-63	5.08845e-62	131.947
CCL7	2.62987	-4.31221	14.9361	5.93343e-39	1.96808e-38	77.394
RMI2	2.62974	1.16138	20.7892	4.36908e-62	2.65484e-61	130.366
MSMB	2.62947	-2.43658	9.32379	1.61673e-18	3.2982e-18	30.5434
LTA	2.62925	-2.78281	15.5815	1.76929e-41	6.27399e-41	83.1727
PKP1	2.62434	1.4122	10.7881	1.82911e-23	4.18548e-23	41.6032
TMEM156	2.62301	-1.01168	17.7498	4.72932e-50	2.08393e-49	102.797
FBXO39	2.62241	-3.12869	16.7947	2.89684e-46	1.15637e-45	94.1788
CD3E	2.62181	1.90447	14.9044	7.89025e-39	2.61227e-38	76.7889
TENM4	2.62063	2.07226	18.8377	2.26903e-54	1.10707e-53	112.507
CCL3L3	2.6202	-1.79135	14.3263	1.3826e-36	4.32905e-36	71.8924
COLEC10	2.61588	-4.14029	17.7581	4.38063e-50	1.93289e-49	102.968
LIPH	2.61242	4.33756	29.0788	2.48316e-93	4.00747e-92	202.003
NME8	2.61161	-3.42185	17.316	2.48954e-48	1.04631e-47	98.9335
PCLAF	2.6116	1.24722	19.7846	4.01658e-58	2.18477e-57	121.236
CTSW	2.61127	0.0302441	15.2993	2.26017e-40	7.79836e-40	80.5108
HS3ST2	2.60958	-0.29612	14.728	3.83282e-38	1.24638e-37	75.4028
MMP2	2.60855	7.53583	20.2613	5.2537e-60	2.99686e-59	125.245
FAP	2.60821	3.41297	17.0423	3.02981e-47	1.24293e-46	95.9474
CP	2.6076	3.26465	10.412	3.69317e-22	8.22948e-22	38.3756
GREB1L	2.60707	-0.352731	13.7329	2.64679e-34	7.82396e-34	66.5889
MCUB	2.60617	2.54588	34.364	1.9901e-111	5.60898e-110	243.872
NREP	2.60605	4.09489	32.4158	6.19965e-105	1.44192e-103	228.767
GBP5	2.60438	1.31604	14.3318	1.31678e-36	4.12563e-36	71.7536
PLCD3	2.60431	4.15845	29.526	6.38184e-95	1.09021e-93	205.682
RAB7B	2.60424	1.85918	21.6786	1.42085e-65	9.57351e-65	138.32
IL12B	2.60333	-4.56897	18.6888	8.84939e-54	4.25293e-53	111.456
ISL2	2.60079	-2.4415	16.921	9.16351e-47	3.70864e-46	95.303
HOXC6	2.59857	-0.0732533	16.8046	2.64867e-46	1.05925e-45	94.1442
EFNB1	2.59786	4.99602	34.6019	3.31037e-112	9.6643e-111	245.472
H2AC11	2.59672	-2.00825	15.2876	2.51298e-40	8.65689e-40	80.4929
CCNJL	2.59602	-0.124976	18.4727	6.37667e-53	3.00693e-52	109.364
SUGCT	2.59052	1.22096	15.016	2.89604e-39	9.68316e-39	77.8717
FOXA1	2.58985	0.884238	12.4393	1.99592e-29	5.25298e-29	55.324
OAS3	2.58937	4.33663	27.1805	1.83046e-86	2.3325e-85	186.174
IL37	2.58929	-4.459	15.6322	1.11889e-41	3.9879e-41	83.6485
MAD2L1	2.58898	1.40317	21.7041	1.12984e-65	7.63641e-65	138.598
HHLA2	2.58517	1.63466	10.3409	6.47984e-22	1.43524e-21	38.028
CALHM5	2.58513	1.22507	20.3777	1.82461e-60	1.0559e-59	126.628
FOLH1	2.58213	-0.789457	16.9314	8.32753e-47	3.37239e-46	95.3276
SOSTDC1	2.58193	-1.70029	11.2485	4.32181e-25	1.02978e-24	45.5322
PPBP	2.58162	-3.76389	12.0534	5.29207e-28	1.34359e-27	52.2806
C7orf57	2.58106	-3.82041	14.6446	8.08068e-38	2.60564e-37	74.7945
RAB41	2.57905	-3.09204	18.5229	4.02848e-53	1.90746e-52	109.937
PLXDC2	2.5788	4.94754	26.4298	1.07202e-83	1.25787e-82	179.755
PMAIP1	2.57834	1.07318	17.8427	2.02286e-50	8.99661e-50	103.533
IL24	2.57766	-1.06632	14.764	2.77728e-38	9.0494e-38	75.7563
ETV1	2.57635	2.94674	26.1748	9.48273e-83	1.08596e-81	177.756
COL4A2	2.57423	8.01117	26.247	5.10949e-83	5.9137e-82	178.298
TYROBP	2.57344	3.84227	23.4266	2.36839e-72	1.94156e-71	153.704
CTSB	2.5733	8.85622	31.0877	2.17449e-100	4.42592e-99	218.395
AMIGO2	2.57034	3.74694	21.9895	8.69286e-67	6.06392e-66	140.89
SSC5D	2.56904	3.16962	21.5619	4.0663e-65	2.69342e-64	137.113
SPRR1B	2.56806	-0.88858	8.0934	1.10507e-14	2.04302e-14	21.7243
PALLD	2.5677	6.2332	27.4709	1.58341e-87	2.08844e-86	188.572
CDH6	2.56567	2.15464	17.9083	1.11029e-50	4.96055e-50	104.007
FNDC10	2.564	1.28749	21.3451	2.8692e-64	1.8571e-63	135.376
PRDM1	2.5615	2.74288	24.8081	1.27143e-77	1.24159e-76	165.964
ARL11	2.56059	-0.488247	20.0702	2.98428e-59	1.67017e-58	123.938
GBP4	2.55897	3.3583	24.1047	5.98854e-75	5.3609e-74	159.736
EPHA4	2.55894	2.39416	18.3952	1.29426e-52	6.06366e-52	108.423
NNMT	2.55863	5.84915	23.8522	5.52091e-74	4.77616e-73	157.35
SCD	2.55426	5.70011	19.1326	1.53582e-55	7.74443e-55	114.861
SPOCK2	2.55384	3.51024	16.7939	2.91874e-46	1.16487e-45	93.6676
GLI1	2.55335	1.46413	19.6217	1.77205e-57	9.45223e-57	119.727
RGS20	2.55309	-3.2601	14.548	1.91656e-37	6.12448e-37	73.9253
TAGAP	2.55299	1.08328	16.2423	4.4276e-44	1.66963e-43	88.951
CCR6	2.55195	-3.82798	13.6965	3.6469e-34	1.07414e-33	66.4082
ADAM8	2.55111	4.29448	25.5364	2.29446e-80	2.42592e-79	172.119
CD163L1	2.54959	0.515486	17.7659	4.08104e-50	1.80192e-49	102.881
FCRL4	2.54923	-4.69083	15.7464	3.98114e-42	1.4333e-41	84.6766
CD300LB	2.54862	-1.47005	16.3404	1.81446e-44	6.91157e-44	89.9847
CYP27C1	2.54822	-0.803231	14.4462	4.7549e-37	1.50519e-36	72.9119
KRT15	2.54707	2.07343	12.9493	2.48405e-31	6.80885e-31	59.5466
UBASH3B	2.54677	2.35929	22.0261	6.25764e-67	4.38237e-66	141.382
MRC2	2.54569	5.47349	27.2435	1.07582e-86	1.38715e-85	186.643
ECT2	2.54151	3.16224	25.4166	6.46191e-80	6.74826e-79	171.2
FCGR3A	2.54111	3.83766	18.7059	7.56254e-54	3.64253e-53	111.088
EN1	2.54109	-3.43586	13.2225	2.31624e-32	6.50195e-32	62.2685
CCIN	2.53594	-3.45304	15.9294	7.58015e-43	2.77863e-42	86.3369
ADGRB2	2.53486	1.06218	22.593	3.9157e-69	2.92668e-68	146.595
POLQ	2.53227	-0.150648	16.1817	7.67837e-44	2.87884e-43	88.4895
NKG7	2.53113	0.324426	16.9011	1.09823e-46	4.44106e-46	95.0077
CD96	2.53053	0.738225	16.0688	2.13966e-43	7.95659e-43	87.4137
HMGA1	2.52855	6.06363	31.9857	1.79452e-103	4.02071e-102	225.32
MTMR11	2.52601	4.37358	21.8232	3.87117e-66	2.65219e-65	139.333
TPM4	2.52554	7.92681	33.3932	3.22822e-108	8.22187e-107	236.367
NAT2	2.5254	-4.18853	14.5199	2.4632e-37	7.85078e-37	73.6806
ADGRE1	2.52519	-2.19938	15.1379	9.67918e-40	3.27835e-39	79.1603
GPR153	2.52482	3.00953	23.7615	1.22832e-73	1.04871e-72	156.753
LAX1	2.52363	-1.23507	15.4386	6.43634e-41	2.25255e-40	81.8202
SLC5A5	2.5228	-3.68702	13.242	1.95441e-32	5.49811e-32	62.4418
NCF2	2.5219	3.03263	20.5747	3.05487e-61	1.81016e-60	128.203
FLNC	2.51888	3.28295	16.5268	3.32693e-45	1.28989e-44	91.2607
ABHD17C	2.5171	4.18764	25.5121	2.8315e-80	2.98727e-79	171.912
ANGPTL2	2.51601	4.16481	25.7696	3.07468e-81	3.34301e-80	174.141
LCP1	2.5149	4.86712	22.3836	2.54559e-68	1.85099e-67	144.324
CCK	2.51378	-2.05634	9.63442	1.55286e-19	3.25517e-19	32.8491
FAM131B	2.51305	-0.379546	18.8665	1.74359e-54	8.53469e-54	112.971
KCNA7	2.5121	-4.20647	13.4164	4.25944e-33	1.21894e-32	63.956
COL4A1	2.51015	7.73482	23.8455	5.85754e-74	5.06066e-73	157.399
SLC2A5	2.50596	0.88946	15.4029	8.87815e-41	3.09438e-40	81.383
TNN	2.50567	-0.917254	16.2639	3.63612e-44	1.37541e-43	89.2669
LY96	2.50194	0.868251	20.9081	1.4887e-62	9.17421e-62	131.467
MYH13	2.49893	-4.2077	16.504	4.09354e-45	1.58397e-44	91.5457
ALKAL1	2.49859	-2.09072	12.2446	1.04868e-28	2.70716e-28	53.8345
GPR55	2.49512	-2.70537	14.9123	7.34462e-39	2.43287e-38	77.1613
LOXL2	2.49468	4.46897	23.0166	8.99513e-71	7.04061e-70	149.992
UBASH3A	2.49406	-1.04797	18.5336	3.65242e-53	1.73275e-52	109.958
CHRNB4	2.49266	-2.86229	16.4748	5.34143e-45	2.0599e-44	91.2656
CLECL1	2.49159	-2.69099	15.3786	1.10618e-40	3.84928e-40	81.345
CHSY3	2.49156	0.444502	19.0811	2.45672e-55	1.23056e-54	114.894
AQP9	2.48803	0.51672	12.6077	4.72002e-30	1.25884e-29	56.7942
TROAP	2.48747	0.795619	15.5379	2.62323e-41	9.26849e-41	82.6096
HSD11B1	2.48577	1.26818	15.4729	4.72186e-41	1.65905e-40	81.9704
TNFSF8	2.48561	-0.724296	15.187	6.21843e-40	2.11608e-39	79.5355
FNDC11	2.48528	-1.53343	16.0507	2.52203e-43	9.35539e-43	87.3611
IRF4	2.48466	-0.123521	13.8062	1.38766e-34	4.12878e-34	67.2314
HPGDS	2.48326	0.0193738	19.3276	2.58977e-56	1.33798e-55	117.164
LST1	2.48017	1.8386	19.0427	3.49014e-55	1.74284e-54	114.402
TRIM14	2.47779	3.7373	39.1881	1.21619e-126	5.263e-125	278.826
VPREB3	2.47658	-2.34896	11.1434	1.02234e-24	2.41275e-24	44.7125
FTL	2.47394	10.6202	24.8074	1.27949e-77	1.24884e-76	166.071
CPNE7	2.47297	1.30146	14.4619	4.1332e-37	1.3103e-36	72.9118
TSPAN5	2.47261	2.48679	22.5151	7.8528e-69	5.80941e-68	145.742
SNX20	2.47256	0.912565	17.6396	1.29435e-49	5.62859e-49	101.693
FGF20	2.47077	-2.53839	13.1834	3.2557e-32	9.11298e-32	61.8998
DKK3	2.46867	5.1012	30.5671	1.39757e-98	2.66438e-97	214.048
HENMT1	2.46829	1.59496	25.2105	3.85087e-79	3.91085e-78	169.583
CD300A	2.46825	2.02682	21.7021	1.15034e-65	7.76688e-65	138.507
ABLIM3	2.46581	3.92442	28.0358	1.39555e-89	1.9624e-88	193.389
TESPA1	2.46576	-0.377281	16.6777	8.41454e-46	3.31765e-45	93.0075
SLC15A3	2.46486	3.63165	29.7148	1.37097e-95	2.38579e-94	207.264
ACSM4	2.46472	-4.82107	17.6421	1.26555e-49	5.50703e-49	101.902
HCAR2	2.46415	-2.1259	12.1057	3.40131e-28	8.67627e-28	52.6681
GPR141	2.45925	-3.04289	14.7539	3.03969e-38	9.89948e-38	75.7585
CHI3L2	2.45861	-0.469113	15.3582	1.32979e-40	4.61754e-40	81.0638
CRLF2	2.45659	-3.53462	15.0484	2.16296e-39	7.26183e-39	78.4044
H3C6	2.45471	-3.41372	13.6793	4.24142e-34	1.24717e-33	66.2554
HPSE	2.45377	1.27346	22.093	3.43481e-67	2.41585e-66	142.1
HBEGF	2.45216	3.32534	21.1195	2.20058e-63	1.39118e-62	133.093
UCP2	2.4521	4.25188	26.9238	1.60647e-85	1.98375e-84	183.995
VASP	2.45154	5.98262	41.5745	9.87539e-134	5.24898e-132	295.081
MSR1	2.45128	3.2328	17.4929	4.9467e-49	2.11677e-48	100.07
IGHV3OR16-17	2.45097	-4.8817	15.5961	1.55018e-41	5.50498e-41	83.3186
KLHL30	2.45071	-0.994363	16.5217	3.48529e-45	1.35021e-44	91.6108
FERMT3	2.44728	3.78312	21.7752	5.95981e-66	4.05757e-65	138.954
TNFRSF8	2.44718	-1.42181	18.7109	7.2309e-54	3.48623e-53	111.593
CACNA1E	2.44552	-2.13131	14.3078	1.62971e-36	5.09301e-36	71.7517
CFAP54	2.44518	-2.2485	16.7974	2.82704e-46	1.12874e-45	94.1759
KIF23	2.44516	1.49189	19.7459	5.71613e-58	3.09117e-57	120.851
INPP4B	2.44291	4.05056	29.8137	6.13247e-96	1.07967e-94	208.027
CD27	2.43956	0.00329323	15.6125	1.33679e-41	4.75409e-41	83.3389
MFSD2B	2.43653	-2.93949	15.7423	4.13266e-42	1.4873e-41	84.6329
ZIC5	2.43408	-4.45321	11.4381	9.06225e-26	2.18864e-25	47.1579
FBLN2	2.43262	4.97143	22.193	1.4016e-67	9.97282e-67	142.603
LSP1	2.43152	4.24525	23.2681	9.64945e-72	7.76402e-71	152.245
AIF1	2.43026	2.82529	20.3207	3.06215e-60	1.75853e-59	125.917
ETV7	2.43022	1.25554	17.881	1.42507e-50	6.3582e-50	103.861
GPSM3	2.4288	3.28672	25.8071	2.227e-81	2.43898e-80	174.551
BLM	2.42657	0.39417	22.0621	4.53362e-67	3.18183e-66	141.896
MXRA8	2.42405	5.57617	26.9127	1.765e-85	2.17813e-84	183.834
LBH	2.42199	5.2535	30.7224	4.0242e-99	7.81662e-98	215.287
IRF8	2.42097	3.20728	19.2699	4.38666e-56	2.25028e-55	116.299
SLC6A7	2.42035	-3.3805	14.59	1.31643e-37	4.22328e-37	74.3059
TUBA4B	2.42005	-4.64577	16.5326	3.15633e-45	1.22447e-44	91.7997
GDF3	2.41996	-4.49507	17.5614	2.6453e-49	1.14045e-48	101.169
FOXM1	2.41944	2.23833	16.9934	4.73035e-47	1.92922e-46	95.6377
PLA2G2C	2.4189	-4.55533	16.8747	1.39727e-46	5.63051e-46	94.9114
ARHGDIB	2.41878	5.38521	31.6613	2.30505e-102	4.94373e-101	222.759
FSTL1	2.41869	7.08643	24.1002	6.22887e-75	5.5735e-74	159.587
PLA2R1	2.41757	2.35208	23.1823	2.06555e-71	1.65311e-70	151.697
ACAN	2.41655	0.0239408	14.147	6.80443e-36	2.09005e-35	70.2296
PPFIA2	2.41558	-0.849748	16.4364	7.57735e-45	2.91127e-44	90.8335
CFL1	2.41521	8.42036	37.203	1.58221e-120	5.69945e-119	264.77
PTGIS	2.41468	4.04885	15.442	6.2382e-41	2.18555e-40	81.3401
SRPX2	2.41442	3.05374	20.9993	6.52466e-63	4.06053e-62	132.039
H2BC9	2.406	-4.64609	14.0857	1.17177e-35	3.57788e-35	69.8246
EPHB1	2.40537	-1.18148	17.8722	1.54485e-50	6.88948e-50	103.928
CDCA7	2.40449	2.37466	12.6233	4.13201e-30	1.10322e-29	56.6955
TMEM176B	2.4028	5.68953	22.1136	2.8546e-67	2.01138e-66	141.871
ADAM9	2.40231	6.03761	29.8312	5.32183e-96	9.40334e-95	208.09
GLIS1	2.39986	-2.39113	14.3664	9.67995e-37	3.04405e-36	72.2826
DAW1	2.39985	-4.2391	12.8161	7.85615e-31	2.131e-30	58.7592
CD5	2.39975	0.917407	15.0271	2.62065e-39	8.77288e-39	77.9999
GJC2	2.39972	0.487752	13.0024	1.56845e-31	4.31915e-31	60.1878
IL7R	2.39881	3.07338	13.0472	1.06401e-31	2.94372e-31	60.2484
SLC1A1	2.3986	3.22807	16.6198	1.42614e-45	5.58578e-45	92.1061
HHIPL1	2.39789	0.969356	20.1907	9.97759e-60	5.65686e-59	124.952
CSTA	2.39761	1.23333	14.5785	1.45995e-37	4.68065e-37	73.954
ELF4	2.39304	3.74609	35.7387	6.90956e-116	2.21923e-114	254.034
CD247	2.3927	0.612258	16.2753	3.28015e-44	1.24196e-43	89.2967
PDCD1LG2	2.38968	-0.609046	18.7777	3.92566e-54	1.90536e-53	112.173
HPDL	2.38878	-0.856701	14.4267	5.65411e-37	1.78695e-36	72.7457
PPP2R2C	2.3853	0.945634	10.2549	1.27596e-21	2.80487e-21	37.4362
KRT6A	2.38372	2.19196	5.61807	4.08725e-08	6.26738e-08	6.58036
DCST1	2.38328	-2.8361	14.8771	1.00779e-38	3.32641e-38	76.8521
SH2D1B	2.38218	-2.76672	15.396	9.45024e-41	3.2926e-40	81.5069
SERPINB2	2.38177	0.469543	9.36932	1.14987e-18	2.35414e-18	30.7364
GLYATL2	2.37977	-3.79614	12.249	1.00994e-28	2.60853e-28	53.9306
PTCRA	2.37957	-4.22141	15.2088	5.11025e-40	1.74353e-39	79.8398
PDPN	2.37921	3.60334	19.5113	4.85014e-57	2.5661e-56	118.453
ANGPT2	2.3792	1.58597	18.3699	1.63128e-52	7.63161e-52	108.286
LY75	2.37769	2.99841	22.9809	1.23618e-70	9.62949e-70	149.827
ITGB5	2.3749	6.59149	37.168	2.03738e-120	7.2854e-119	264.403
TACC3	2.37279	3.46286	26.7312	8.23681e-85	9.95747e-84	182.434
METTL7B	2.37181	2.14122	16.3476	1.70011e-44	6.47976e-44	89.7719
TTYH3	2.37127	5.58695	35.9731	1.22823e-116	4.03091e-115	255.661
FCER2	2.37	-2.6895	8.99642	1.82162e-17	3.61992e-17	28.1658
GIMAP2	2.36889	1.80108	23.0651	5.84817e-71	4.61996e-70	150.718
CYP1B1	2.36653	3.94629	15.2584	3.26919e-40	1.12126e-39	79.6944
TRIM40	2.36649	-4.57099	12.6848	2.43453e-30	6.53575e-30	57.6282
ABCB11	2.36525	-3.66699	13.5756	1.055e-33	3.06942e-33	65.3517
GCNT1	2.36504	2.93824	19.8376	2.48022e-58	1.3555e-57	121.503
MILR1	2.36485	0.727772	17.2395	5.00368e-48	2.08771e-47	98.0602
TBC1D2	2.36415	3.3346	26.6131	2.24762e-84	2.68398e-83	181.444
GPX8	2.36333	3.80959	30.4929	2.53574e-98	4.77832e-97	213.538
RGS1	2.36136	4.34107	17.0523	2.76455e-47	1.13554e-46	95.9154
SEMG1	2.36064	-4.73124	13.4467	3.26782e-33	9.37498e-33	64.2128
ITPRID1	2.36041	-3.08742	12.1208	2.99406e-28	7.6504e-28	52.8386
E2F1	2.36034	1.40006	17.3033	2.79445e-48	1.17295e-47	98.5692
OSCAR	2.36032	1.20812	16.8283	2.13359e-46	8.56062e-46	94.2623
AXL	2.35962	4.52196	27.6591	3.25894e-88	4.3841e-87	190.176
EVI2A	2.3582	1.40305	16.8162	2.38116e-46	9.53439e-46	94.1278
TMEM158	2.35737	1.94956	14.4144	6.31288e-37	1.9929e-36	72.4006
COL16A1	2.35625	5.6397	28.1732	4.43897e-90	6.37959e-89	194.432
CCL3	2.35588	-0.338831	14.5574	1.76229e-37	5.63701e-37	73.8903
ARHGAP15	2.35587	1.15293	17.0738	2.27139e-47	9.34744e-47	96.5039
CD6	2.35578	1.53718	16.5404	2.94072e-45	1.14264e-44	91.6011
KLHL38	2.35544	-3.52216	14.2177	3.6329e-36	1.12365e-35	71.0024
PMEPA1	2.35536	7.08015	24.7741	1.70976e-77	1.663e-76	165.486
STON2	2.35516	1.29524	21.5848	3.30718e-65	2.19954e-64	137.529
IKZF3	2.35506	1.85374	12.7645	1.22578e-30	3.31074e-30	57.9754
ITGA4	2.3549	1.66385	14.8495	1.29082e-38	4.24199e-38	76.3158
SLC52A3	2.35409	2.10301	19.2578	4.89552e-56	2.50606e-55	116.327
CD7	2.35347	0.8416	16.2076	6.0651e-44	2.27922e-43	88.6609
XCL2	2.35313	-3.55729	14.238	3.03336e-36	9.39995e-36	71.1825
VSTM1	2.35151	-4.09697	12.7927	9.61761e-31	2.60446e-30	58.5599
LOXL1	2.34841	3.94903	25.4727	3.9776e-80	4.16945e-79	171.585
APOBEC3D	2.34827	0.676028	24.3463	7.19102e-76	6.62536e-75	162.131
BEAN1	2.34707	1.05975	12.1826	1.77364e-28	4.55521e-28	53.1245
CRYGN	2.34649	-3.42684	13.7965	1.51166e-34	4.49227e-34	67.2853
GZMM	2.34501	-1.5274	15.7256	4.80507e-42	1.72707e-41	84.4255
CRYBB1	2.34475	-2.73403	15.5862	1.69589e-41	6.01916e-41	83.2206
GLT8D2	2.34282	2.60623	19.5346	3.92226e-57	2.07856e-56	118.784
CEACAM21	2.34142	-1.1415	18.2796	3.7248e-52	1.72647e-51	107.648
LRRC66	2.34116	0.502813	11.1736	7.98692e-25	1.89019e-24	44.8139
CHRDL2	2.34023	-0.0673746	9.74203	6.83006e-20	1.44241e-19	33.5732
NKX3-2	2.33997	-0.422995	15.0103	3.04813e-39	1.01787e-38	77.9395
WDFY4	2.33975	1.92966	13.1487	4.40443e-32	1.22984e-31	61.278
SDCBP2	2.33838	4.53777	20.5566	3.59961e-61	2.12586e-60	127.857
PXDN	2.33785	4.87807	25.5519	2.00833e-80	2.12916e-79	172.196
EVPL	2.33783	4.37639	21.0305	4.91944e-63	3.07426e-62	132.163
TSLP	2.33771	-1.55319	16.2894	2.88505e-44	1.09321e-43	89.5313
MARVELD1	2.33595	4.75637	34.3689	1.91715e-111	5.42684e-110	243.71
INSL3	2.33461	-2.6458	15.982	4.70396e-43	1.73276e-42	86.793
GDF5	2.33405	-4.15529	15.2799	2.69293e-40	9.2654e-40	80.4796
CASP5	2.33381	-3.55037	12.4249	2.25765e-29	5.93383e-29	55.4221
LHX1	2.33245	-4.54201	10.3882	4.45894e-22	9.92003e-22	38.7093
SLC9B2	2.33186	3.04241	18.8113	2.88813e-54	1.40597e-53	112.129
RAD51AP1	2.33179	0.39272	18.4997	4.98114e-53	2.35398e-52	109.591
SLC7A7	2.32762	3.86752	29.1594	1.28139e-93	2.09216e-92	202.69
H3C8	2.32595	-4.63034	13.6685	4.66548e-34	1.37063e-33	66.1531
RTP4	2.3246	2.05102	21.0247	5.18505e-63	3.23714e-62	132.388
BFSP2	2.32333	-4.80656	16.7367	4.91806e-46	1.95285e-45	93.6529
MX1	2.32146	4.94288	21.4993	7.14206e-65	4.69733e-64	136.359
NECTIN4	2.32101	4.09157	20.3155	3.21185e-60	1.84288e-59	125.705
ALOX5AP	2.32084	3.50045	18.5205	4.11772e-53	1.94924e-52	109.418
C1QC	2.31927	5.06505	19.6619	1.2292e-57	6.57813e-57	119.691
GPR78	2.31769	-2.87132	12.9447	2.58631e-31	7.0852e-31	59.8537
ZFP57	2.31713	-3.14717	8.74762	1.10936e-16	2.15955e-16	26.3957
ADAMTS2	2.3165	4.97381	23.6287	3.96687e-73	3.34016e-72	155.379
MMP16	2.31638	0.731858	16.8134	2.44413e-46	9.78253e-46	94.1757
ABCG8	2.31589	-4.27212	11.6446	1.63303e-26	4.0103e-26	48.8645
CLDN11	2.31473	1.80635	15.2795	2.7038e-40	9.30115e-40	80.1548
ROBO1	2.31107	3.29968	23.3187	6.16029e-72	4.98945e-71	152.788
MME	2.31077	1.36493	11.2008	6.39402e-25	1.5156e-24	44.9341
AK5	2.31062	-0.9601	16.5715	2.21467e-45	8.6327e-45	92.0666
LIPG	2.31053	2.35877	19.4411	9.1961e-57	4.83277e-56	117.964
CAMP	2.3072	-4.06856	13.7134	3.14319e-34	9.28011e-34	66.5548
H2AC8	2.30718	-2.82877	11.4133	1.11196e-25	2.68121e-25	46.9441
IL19	2.30697	-4.81664	15.9842	4.61274e-43	1.70012e-42	86.8246
SPC25	2.30599	0.222439	19.1342	1.51298e-55	7.63121e-55	115.393
RND3	2.30533	3.90255	31.4163	1.59922e-101	3.35271e-100	220.903
ABCB5	2.3048	-3.38421	13.28	1.40258e-32	3.9605e-32	62.7726
OCIAD2	2.30374	5.03325	36.406	5.14077e-118	1.74269e-116	258.844
CCR9	2.30052	-2.87844	13.7414	2.45661e-34	7.27057e-34	66.7882
CA9	2.30038	2.81662	7.28788	2.31136e-12	4.01404e-12	16.0754
DACT1	2.29939	2.91954	20.9295	1.22683e-62	7.58672e-62	131.417
KRT12	2.29559	-4.89139	14.2799	2.09006e-36	6.51186e-36	71.5401
CFAP300	2.295	-0.185372	20.5003	5.9976e-61	3.52186e-60	127.838
TMEM270	2.29495	-3.96175	13.0689	8.81131e-32	2.44502e-31	60.9421
S1PR4	2.29277	0.2637	15.5572	2.20473e-41	7.79687e-41	82.8264
SEC14L2	2.28935	3.16137	23.5374	8.88679e-73	7.38741e-72	154.739
PRAC2	2.28921	-4.93044	14.0222	2.05594e-35	6.24154e-35	69.2612
IL13RA2	2.28797	-2.67721	12.2803	7.73974e-29	2.0033e-28	54.1724
GAP43	2.28777	0.0791817	14.8976	8.38217e-39	2.77326e-38	76.9117
CDR2L	2.28773	4.10168	32.3496	1.03938e-104	2.40594e-103	228.23
TLR8	2.28765	-0.26994	12.9213	3.16709e-31	8.65442e-31	59.5386
AURKA	2.2872	1.58372	18.4765	6.15838e-53	2.9054e-52	109.256
CNN1	2.28548	3.45168	13.8359	1.06765e-34	3.1873e-34	67.0725
SLC16A6	2.28362	-0.276191	17.2721	3.71749e-48	1.55571e-47	98.4219
FAM178B	2.28342	-3.28639	14.9397	5.74434e-39	1.90601e-38	77.429
PSORS1C1	2.28307	0.646881	12.3581	3.99041e-29	1.04139e-28	54.6561
PLEKHO1	2.28138	3.89818	26.6136	2.23897e-84	2.67527e-83	181.382
ADGRF2	2.2803	-4.4115	12.5274	9.39926e-30	2.48984e-29	56.2853
RAB34	2.27985	3.9162	24.9647	3.25416e-78	3.23268e-77	167.179
APOBR	2.27958	2.42551	21.1766	1.31434e-63	8.34422e-63	133.712
CCNB1	2.27934	2.61968	20.5448	4.00715e-61	2.36297e-60	127.965
GAL3ST4	2.27918	1.88523	20.8368	2.84071e-62	1.73639e-61	130.706
ISLR2	2.27837	0.245623	16.9416	7.58919e-47	3.07912e-46	95.3844
HTR3C	2.27656	-4.48469	12.3769	3.40059e-29	8.89246e-29	55.0042
ST8SIA4	2.27618	1.90053	18.7567	4.7547e-54	2.30374e-53	111.774
SEMA3E	2.27614	0.360442	10.3938	4.26381e-22	9.48806e-22	38.5858
NAGS	2.27457	0.811305	16.9573	6.57763e-47	2.67426e-46	95.4789
FABP2	2.2745	-4.22633	9.39225	9.682e-19	1.98741e-18	31.093
TSPAN15	2.27277	5.08834	30.056	8.60392e-97	1.54966e-95	209.91
GINS1	2.27138	0.71179	18.8437	2.14827e-54	1.04919e-53	112.705
CLIC1	2.27054	7.45218	35.5029	3.95654e-115	1.25429e-113	252.259
ARHGAP42	2.26966	2.20502	23.3342	5.36994e-72	4.36015e-71	153.054
GREM2	2.2682	-0.868091	11.8315	3.42546e-27	8.54945e-27	50.3147
IFITM10	2.26789	1.74476	13.868	8.03909e-35	2.40766e-34	67.59
C1QB	2.26754	5.36295	18.5801	2.38885e-53	1.13799e-52	109.805
DNAH2	2.26749	1.16049	11.0236	2.71635e-24	6.34561e-24	43.522
AQP10	2.26687	-3.8088	11.9133	1.72269e-27	4.32775e-27	51.1088
ANXA10	2.26651	3.70216	7.76019	1.05407e-13	1.89623e-13	18.9937
VNN2	2.26612	1.67937	11.8294	3.48495e-27	8.6946e-27	50.0772
SRGN	2.26424	4.79971	21.8377	3.39991e-66	2.33587e-65	139.411
VMO1	2.26236	-0.14227	18.2608	4.42254e-52	2.04697e-51	107.439
SLCO1B3	2.2615	-2.93478	7.57424	3.61086e-13	6.40736e-13	18.4025
HAVCR2	2.26107	2.40828	18.3971	1.27284e-52	5.96473e-52	108.424
RFTN1	2.26067	3.91135	28.236	2.63265e-90	3.80596e-89	195.045
CCRL2	2.26043	1.31128	19.7517	5.42028e-58	2.93605e-57	120.92
AICDA	2.25843	-4.515	13.2834	1.36186e-32	3.84719e-32	62.7932
EPHA2	2.25671	5.57671	23.9435	2.47144e-74	2.16583e-73	158.134
FUT7	2.25574	-2.75435	13.9685	3.30726e-35	1.00016e-34	68.7828
TMEM119	2.25339	4.14901	18.0313	3.60696e-51	1.62938e-50	104.866
SIM2	2.25296	0.999984	11.7311	7.93643e-27	1.96427e-26	49.3466
TOR4A	2.25261	4.16323	28.6478	8.66037e-92	1.31824e-90	198.437
FCMR	2.25196	1.31224	11.2174	5.57648e-25	1.3239e-24	45.0753
BLK	2.25118	-1.40438	9.15523	5.6609e-18	1.13788e-17	29.2614
ABCG1	2.24941	3.56716	28.72	4.76791e-92	7.33756e-91	199.094
SKAP2	2.24819	4.39783	41.3833	3.56713e-133	1.86559e-131	293.824
RSAD2	2.24708	2.5748	15.8296	1.87406e-42	6.79706e-42	85.009
QPCT	2.24495	3.24155	17.9399	8.31361e-51	3.73054e-50	104.137
EYA1	2.24394	-3.09717	13.5981	8.65931e-34	2.52499e-33	65.5406
ANTXR2	2.24346	5.09782	27.9754	2.30967e-89	3.23387e-88	192.785
HMGA2	2.24346	0.706237	8.80126	7.53357e-17	1.47298e-16	26.569
CERKL	2.23923	1.50247	20.0189	4.76261e-59	2.65026e-58	123.327
TK1	2.23687	3.15841	19.3831	1.56114e-56	8.14941e-56	117.323
MYL9	2.23565	6.75112	22.0229	6.44415e-67	4.51137e-66	141.09
DOK6	2.23554	0.208701	18.8859	1.46029e-54	7.17669e-54	113.131
KLHL6	2.23397	1.90565	14.3349	1.28103e-36	4.01619e-36	71.6927
FAR2	2.23299	1.78846	20.3367	2.6499e-60	1.52492e-59	126.18
FAM155A	2.23215	0.393193	15.6814	7.16945e-42	2.56651e-41	83.9387
FAM216B	2.23161	-4.13937	13.3167	1.01823e-32	2.88312e-32	63.0887
PENK	2.22713	-1.92541	10.3518	5.94709e-22	1.31888e-21	38.3756
CMTM1	2.22637	-1.02843	17.8677	1.60963e-50	7.17184e-50	103.885
PTPN7	2.2262	1.57864	15.6981	6.1633e-42	2.21079e-41	83.9566
C17orf99	2.22599	-4.24478	13.6056	8.11286e-34	2.3667e-33	65.6072
HMOX1	2.22493	3.36251	22.4541	1.35474e-68	9.94321e-68	145.077
AL121753.1	2.22394	-3.87085	14.9044	7.88611e-39	2.61135e-38	77.1163
EMP1	2.22184	6.18855	21.7868	5.36931e-66	3.66319e-65	138.938
GPC5	2.21729	-3.3549	12.2405	1.08533e-28	2.80029e-28	53.8586
GBP1	2.21721	3.49905	22.6288	2.84512e-69	2.12976e-68	146.62
FAM81A	2.21678	0.605285	20.0265	4.44367e-59	2.47701e-58	123.491
H1-3	2.21659	-4.47857	12.3637	3.80465e-29	9.93444e-29	54.8924
UBXN10	2.21617	2.19223	17.3417	1.9689e-48	8.28744e-48	98.8108
FUT3	2.21458	4.05407	18.6434	1.33976e-53	6.41196e-53	110.462
GFI1B	2.2143	-3.4822	12.9687	2.10094e-31	5.76683e-31	60.0796
MELTF	2.21363	4.21066	17.9115	1.07841e-50	4.82143e-50	103.755
HTR3E	2.21334	-4.24136	10.5096	1.7009e-22	3.81533e-22	39.6708
LMNB1	2.21284	3.11342	29.4141	1.59071e-94	2.67996e-93	204.849
CLEC2B	2.21225	2.04367	20.4525	9.25574e-61	5.39298e-60	127.201
CCDC80	2.21178	6.39119	16.1225	1.31407e-43	4.9024e-43	87.4069
CGB3	2.21175	-4.7911	9.5806	2.33747e-19	4.87325e-19	32.4931
ARRDC5	2.20987	-3.22494	14.436	5.20436e-37	1.64641e-36	72.9364
KLHL4	2.20884	-1.32041	14.0855	1.17419e-35	3.58469e-35	69.7523
RASAL1	2.20759	2.79052	16.1265	1.2673e-43	4.7288e-43	87.6694
PLK1	2.20749	2.47808	18.5886	2.2103e-53	1.05396e-52	110.16
TMEM176A	2.20697	5.10093	22.4015	2.16852e-68	1.57975e-67	144.447
RARRES1	2.20641	3.76629	14.3332	1.30029e-36	4.07525e-36	71.4277
TICRR	2.20585	0.00651835	18.0806	2.29648e-51	1.04488e-50	105.789
CD53	2.20356	3.72991	17.165	9.88182e-48	4.09857e-47	96.999
HOXA6	2.20311	-3.6852	11.8508	2.91311e-27	7.27998e-27	50.5875
GABRQ	2.20092	-4.31048	14.3701	9.36172e-37	2.94492e-36	72.3474
HLA-F	2.20027	5.00819	27.9561	2.71365e-89	3.77786e-88	192.622
TTC9	2.19913	3.08862	18.9637	7.17959e-55	3.54897e-54	113.505
GLIPR2	2.19757	3.14519	22.0219	6.50087e-67	4.54945e-66	141.23
ALDH3B1	2.19721	4.65058	23.4412	2.0826e-72	1.71158e-71	153.727
ODF3L1	2.19709	-2.4552	13.9673	3.34251e-35	1.01066e-34	68.7612
CPXM2	2.19487	3.47486	17.5355	3.3527e-49	1.44161e-48	100.409
FAM163A	2.19216	-2.35943	12.7661	1.20944e-30	3.26793e-30	58.3014
GJA3	2.1921	-2.90752	11.4217	1.03772e-25	2.50313e-25	47.0196
TM4SF19	2.19131	-3.34245	12.059	5.04723e-28	1.2823e-27	52.3292
PNMA1	2.18743	4.27428	37.7913	2.32544e-122	8.88391e-121	268.899
OIP5	2.18743	-1.28922	16.0821	1.89673e-43	7.05994e-43	87.6435
EVI2B	2.18658	2.3194	15.3383	1.59094e-40	5.51459e-40	80.6097
HR	2.18644	2.17725	14.4242	5.78082e-37	1.82611e-36	72.4485
KRT81	2.18474	-1.33346	9.68107	1.08835e-19	2.28904e-19	33.1746
CD300C	2.1843	-0.539154	16.906	1.04988e-46	4.24643e-46	95.0986
RPL39L	2.18423	0.675874	16.0028	3.8956e-43	1.43851e-42	86.8194
DPEP2	2.18329	0.595665	16.9977	4.55196e-47	1.85841e-46	95.8665
FPR2	2.18326	-1.44761	10.2805	1.04317e-21	2.29987e-21	37.7964
TM6SF2	2.18243	-1.0257	15.6662	8.22333e-42	2.93948e-41	83.871
GAPT	2.182	-0.381924	13.4612	2.87829e-33	8.26594e-33	64.2285
GBP3	2.18145	3.93671	16.6432	1.15318e-45	4.52756e-45	92.2153
HCK	2.18096	2.73059	17.7408	5.13466e-50	2.25948e-49	102.381
PLEK	2.18002	2.29719	14.2498	2.73041e-36	8.47459e-36	70.8817
LANCL3	2.17992	-1.11268	16.4403	7.31371e-45	2.81109e-44	90.8854
DTHD1	2.17553	-2.87217	11.5494	3.60309e-26	8.78867e-26	48.0718
CPNE5	2.17476	1.02223	16.7184	5.8077e-46	2.30237e-45	93.2792
CDH16	2.17448	-3.40509	10.3462	6.21635e-22	1.37781e-21	38.3913
NHS	2.17362	2.32187	17.6785	9.07214e-50	3.96361e-49	101.864
ACP5	2.17261	4.21326	19.4192	1.12338e-56	5.89095e-56	117.522
POC1A	2.17127	1.0319	18.3109	2.79828e-52	1.30227e-51	107.806
PPM1N	2.171	-0.175772	16.5833	1.98911e-45	7.76432e-45	92.147
GPR137B	2.17052	2.89107	31.091	2.11931e-100	4.31809e-99	218.412
H2BC17	2.17008	-4.81102	14.291	1.89291e-36	5.90421e-36	71.6391
CXCL16	2.17006	5.28319	34.9493	2.44346e-113	7.39846e-112	248.047
ENTPD2	2.16789	2.51354	16.5495	2.70504e-45	1.05253e-44	91.5486
SPON1	2.16709	4.61773	18.0708	2.51259e-51	1.14161e-50	105.178
TMPRSS15	2.16693	-4.81745	8.59026	3.42343e-16	6.59272e-16	25.2746
LRRC19	2.16674	-1.32591	9.76558	5.70244e-20	1.20623e-19	33.8181
PHGR1	2.16603	-0.921084	7.69998	1.57386e-13	2.81937e-13	19.1191
TMEM211	2.16554	-4.04687	10.6344	6.2825e-23	1.4241e-22	40.6635
FXYD4	2.16546	-4.60512	11.8994	1.9364e-27	4.85901e-27	50.98
MAP1A	2.16483	3.45279	22.8474	4.05264e-70	3.10496e-69	148.572
PLEKHG1	2.16447	3.43983	31.0022	4.29921e-100	8.66041e-99	217.645
IFI27L2	2.16404	3.33064	28.1722	4.47584e-90	6.42786e-89	194.569
CCR5	2.16375	1.04297	12.7749	1.12086e-30	3.03069e-30	58.165
RENBP	2.16372	1.82153	20.4709	7.83001e-61	4.57862e-60	127.394
TTC6	2.16365	-3.11835	11.8159	3.9035e-27	9.73016e-27	50.2893
FZD7	2.1635	2.87507	24.2864	1.21568e-75	1.11323e-74	161.364
FLVCR2	2.16171	1.09221	19.6846	9.99132e-58	5.35719e-57	120.331
OLFM4	2.16154	8.22514	6.53748	2.35701e-10	3.87031e-10	11.4435
ULBP2	2.1611	-0.724875	13.1864	3.1707e-32	8.87888e-32	61.8485
AQP6	2.15925	-2.02965	11.0144	2.92696e-24	6.82702e-24	43.6605
ATG9B	2.15888	0.661519	12.3649	3.76734e-29	9.83833e-29	54.7109
ADAMTS18	2.15736	-2.1224	13.068	8.88286e-32	2.46452e-31	60.8927
TRPM8	2.15401	-1.75812	12.7594	1.28138e-30	3.45803e-30	58.2147
SLC52A1	2.15392	-2.74994	13.1833	3.25931e-32	9.12178e-32	61.9171
OTOA	2.15295	-2.96901	12.3089	6.07072e-29	1.57652e-28	54.4281
SI	2.15184	-3.87752	7.10756	7.25323e-12	1.24287e-11	15.4641
CHRNA3	2.14866	-0.584411	13.3952	5.13049e-33	1.46542e-32	63.6603
MLPH	2.14853	5.67308	20.6525	1.50884e-61	9.02538e-61	128.671
LYPD3	2.14776	1.32663	10.4507	2.71674e-22	6.07516e-22	38.9198
EGR4	2.14747	-2.27293	12.1837	1.75828e-28	4.51635e-28	53.3404
ZCCHC12	2.14734	-2.80116	14.3288	1.35252e-36	4.23623e-36	71.9734
WDR88	2.14723	-2.34639	16.1732	8.29496e-44	3.10525e-43	88.5181
STING1	2.14529	4.82699	36.0467	7.14998e-117	2.35841e-115	256.21
CSTB	2.14341	6.16094	29.6817	1.79491e-95	3.1097e-94	206.864
GNG13	2.1423	-4.38328	11.9104	1.76623e-27	4.43542e-27	51.0748
MYH14	2.14163	6.79476	28.5155	2.58794e-91	3.86708e-90	197.311
ITGBL1	2.13747	3.43022	13.1687	3.70065e-32	1.03481e-31	61.2348
GRAMD1B	2.13663	3.17526	16.5364	3.04958e-45	1.184e-44	91.3354
ADAMTS7	2.13614	2.08375	16.779	3.34342e-46	1.33273e-45	93.6931
SPON2	2.13578	5.40712	24.2704	1.39863e-75	1.27599e-74	161.003
ARPC1B	2.13547	6.47323	33.5115	1.3037e-108	3.36417e-107	237.169
IGLON5	2.13544	-1.73771	12.4135	2.48876e-29	6.53776e-29	55.2603
GPR18	2.13532	-2.37027	13.276	1.4529e-32	4.10023e-32	62.708
DDX60	2.13529	3.95214	22.6154	3.20662e-69	2.39853e-68	146.442
NOTUM	2.13516	-0.702299	12.9595	2.27396e-31	6.23823e-31	59.8862
SERINC2	2.13348	6.1517	23.1971	1.81044e-71	1.45013e-70	151.538
IL20RB	2.13279	0.418863	9.45271	6.14583e-19	1.2674e-18	31.3625
GRN	2.13225	7.56977	31.9445	2.47932e-103	5.536e-102	225.071
RNASE6	2.13162	2.29128	15.1875	6.18813e-40	2.10614e-39	79.255
TSPO2	2.1305	-3.44318	12.8146	7.96217e-31	2.15946e-30	58.7537
ZNF185	2.12996	3.65835	21.6316	2.16976e-65	1.45145e-64	137.65
ACTG2	2.12964	3.05852	8.8598	4.93074e-17	9.68521e-17	26.6488
PTPRH	2.1275	4.24451	19.8382	2.46581e-58	1.34799e-57	121.338
MET	2.12673	5.42897	24.825	1.09777e-77	1.07685e-76	165.853
PLAC1	2.12561	-4.57475	12.1703	1.96893e-28	5.05012e-28	53.2548
GIP	2.1233	-5.07033	12.0625	4.90145e-28	1.24591e-27	52.3422
FCER1G	2.12252	3.39958	19.031	3.883e-55	1.93507e-54	114.076
RCSD1	2.1223	2.36085	14.2517	2.68577e-36	8.34e-36	70.8856
FSD1	2.12201	-2.43649	15.1698	7.25894e-40	2.46544e-39	79.4677
HMSD	2.12103	-2.81116	12.4197	2.36091e-29	6.2044e-29	55.3628
LTBP2	2.12103	5.94545	22.4938	9.49853e-69	7.01099e-68	145.266
P2RY14	2.11739	-1.19297	13.6153	7.44551e-34	2.17364e-33	65.6135
PLPPR3	2.11525	-4.00729	13.4752	2.54643e-33	7.32366e-33	64.4716
SH3TC2	2.11444	-0.0735749	14.312	1.57065e-36	4.91001e-36	71.7035
RAET1E	2.11419	-2.89978	13.3751	6.11357e-33	1.74063e-32	63.5905
VASH2	2.11285	-0.0958723	20.3073	3.45958e-60	1.98269e-59	126.089
TEKT1	2.11244	-4.71016	13.2443	1.91471e-32	5.38796e-32	62.451
BNIP5	2.11226	1.81575	8.04437	1.54599e-14	2.84769e-14	21.1519
C16orf74	2.11185	-0.315958	11.5095	5.01928e-26	1.21929e-25	47.6206
TMEM114	2.11129	-5.0543	13.2417	1.9601e-32	5.5133e-32	62.4246
STMN2	2.10866	2.47617	12.3917	2.99703e-29	7.84975e-29	54.6905
OMD	2.1086	1.11847	10.4045	3.9203e-22	8.72764e-22	38.5788
BCAR3	2.10657	3.45735	24.161	3.65166e-75	3.2961e-74	160.188
SLC22A4	2.10656	-0.163271	23.7632	1.2108e-73	1.03465e-72	157.053
CD22	2.10493	1.07377	9.67669	1.12525e-19	2.36564e-19	32.9679
GRAMD2A	2.10482	-0.133243	15.3024	2.19932e-40	7.58975e-40	80.5575
PRSS41	2.10418	-4.7035	10.597	8.47344e-23	1.91541e-22	40.3554
FRZB	2.10411	3.11822	16.3064	2.47078e-44	9.37688e-44	89.251
HLA-DMB	2.10245	4.02644	19.7687	4.6426e-58	2.52038e-57	120.728
PURG	2.10138	-2.77664	14.2862	1.97551e-36	6.15892e-36	71.5962
CCDC192	2.10061	-2.87559	15.0313	2.52428e-39	8.45459e-39	78.2417
BEND4	2.1005	-3.83489	10.6935	3.91289e-23	8.89437e-23	41.1375
BIRC3	2.1005	5.19829	20.4041	1.43616e-60	8.32333e-60	126.424
FASLG	2.1	-2.72306	12.9683	2.10772e-31	5.78463e-31	60.0593
PLXNC1	2.09995	3.36245	20.5484	3.8778e-61	2.28877e-60	127.893
FUT2	2.09917	3.73644	16.2739	3.32274e-44	1.25784e-43	88.8716
TM4SF1	2.09877	7.58371	17.3622	1.6323e-48	6.89138e-48	98.7799
H2AC7	2.09871	-4.12232	11.0708	1.8492e-24	4.33854e-24	44.1649
DDIAS	2.09823	-0.422352	18.2038	7.45175e-52	3.42553e-51	106.934
LGALS9	2.09792	5.32223	25.9609	5.93521e-82	6.66434e-81	175.688
CFAP45	2.09758	-0.880411	13.6004	8.49017e-34	2.47641e-33	65.4654
CD79B	2.09524	0.657827	9.56589	2.61334e-19	5.44029e-19	32.1845
CCDC89	2.09502	-2.61779	14.9626	4.67619e-39	1.55529e-38	77.6186
RNF175	2.09482	-1.47489	17.2823	3.38706e-48	1.41895e-47	98.5673
MN1	2.09477	2.67351	18.2009	7.64917e-52	3.51545e-51	106.586
TMC1	2.09414	-4.70802	16.1451	1.07064e-43	3.99956e-43	88.2821
COL6A2	2.09392	8.18922	19.0283	3.97795e-55	1.98188e-54	114.058
STMN1	2.09388	4.86414	33.1185	2.67076e-107	6.62106e-106	234.134
ADGRG6	2.09374	3.85544	19.9067	1.32148e-58	7.27912e-58	122.001
GP5	2.09315	-3.56696	12.3296	5.09053e-29	1.32496e-28	54.6157
P2RY6	2.09236	0.707391	15.7141	5.33299e-42	1.91436e-41	84.2036
PVALB	2.09156	-4.0896	12.3414	4.60224e-29	1.19835e-28	54.7095
RCN3	2.09138	4.35094	23.8435	5.96414e-74	5.15049e-73	157.298
EMILIN1	2.09061	5.72528	20.7789	4.79569e-62	2.91045e-61	129.818
ZNF695	2.09036	-3.77268	11.5375	3.97731e-26	9.68939e-26	47.9876
KIAA2012	2.08884	-4.17686	13.5488	1.33517e-33	3.8696e-33	65.1119
SH3D21	2.0864	1.76303	13.1533	4.23254e-32	1.18235e-31	61.333
TMSB4X	2.08336	9.76668	23.9391	2.56908e-74	2.24737e-73	158.392
ODAPH	2.08234	-4.5454	11.3278	2.25128e-25	5.39249e-25	46.2508
VSNL1	2.0819	0.127746	14.4909	3.18931e-37	1.0137e-36	73.2823
STC1	2.08108	3.77929	17.6358	1.34009e-49	5.82103e-49	101.276
LHX5	2.07872	-4.81538	11.442	8.77332e-26	2.11912e-25	47.1844
UGT1A8	2.07752	-4.71648	12.4081	2.60661e-29	6.84366e-29	55.2653
C1orf54	2.07657	1.75437	28.3881	7.43867e-91	1.09234e-89	196.535
NBL1	2.07534	5.56681	25.5427	2.17417e-80	2.29999e-79	172.08
FOLR2	2.07519	1.98403	12.5878	5.60231e-30	1.49192e-29	56.4286
IL1RAP	2.0726	3.20309	22.407	2.06333e-68	1.50536e-67	144.663
ISG20	2.07221	3.56579	20.8373	2.82673e-62	1.72838e-61	130.483
PTPRC	2.07108	3.73275	13.3055	1.12347e-32	3.17881e-32	62.3794
ILDR2	2.07107	0.438895	16.6993	6.91432e-46	2.7322e-45	93.1644
UPK2	2.0706	-2.92427	9.54398	3.08513e-19	6.40879e-19	32.2227
TDGF1	2.07055	-3.19209	11.0416	2.34611e-24	5.49053e-24	43.9316
IFI16	2.07035	5.25547	27.7408	1.64372e-88	2.23583e-87	190.804
OPCML	2.06325	-1.7917	12.2091	1.4168e-28	3.64496e-28	53.5359
CCL21	2.06309	2.86444	7.82156	6.99053e-14	1.26419e-13	19.5014
CD4	2.06264	4.21093	21.1627	1.49012e-63	9.45097e-63	133.357
LMNA	2.06211	7.86484	30.7068	4.55809e-99	8.81862e-98	215.263
CPVL	2.06201	3.26078	16.3055	2.49294e-44	9.4573e-44	89.2194
FKBP10	2.06184	5.50886	27.1386	2.60822e-86	3.31049e-85	185.725
FAM124B	2.06104	-0.742816	17.6065	1.75221e-49	7.59098e-49	101.496
VRTN	2.06093	-4.44454	12.1315	2.73463e-28	6.99574e-28	52.9297
B4GALNT2	2.05987	-4.25002	9.10995	7.90916e-18	1.58426e-17	29.0117
SLAMF8	2.05972	2.44819	16.6636	9.56964e-46	3.767e-45	92.5881
PYHIN1	2.05662	-1.18745	13.5072	1.92289e-33	5.55317e-33	64.6692
ERCC6L	2.05555	-0.692112	17.4019	1.13596e-48	4.81564e-48	99.6261
FOSB	2.05291	3.80336	8.53403	5.10567e-16	9.78223e-16	24.2289
MSN	2.05254	7.1579	25.6131	1.1838e-80	1.26186e-79	172.765
TMEM233	2.05236	-1.20488	14.8598	1.17653e-38	3.87554e-38	76.6347
GJA1	2.05126	4.88895	21.8381	3.38677e-66	2.32766e-65	139.393
ZNF521	2.04849	2.2377	17.6522	1.15399e-49	5.02943e-49	101.63
LOX	2.0478	4.16208	17.2791	3.48723e-48	1.46029e-47	97.9763
BTNL8	2.04705	0.202675	7.10285	7.47127e-12	1.27956e-11	15.2633
EMILIN2	2.04507	2.99805	22.4151	1.92052e-68	1.40326e-67	144.762
PRSS23	2.04345	5.78054	27.3083	6.22715e-87	8.07178e-86	187.162
UNC5B	2.04305	4.79035	28.9501	7.15069e-93	1.13345e-91	200.873
ELK3	2.04302	4.71477	36.3106	1.0329e-117	3.47737e-116	258.147
B4GALNT3	2.04256	4.52786	22.6787	1.82362e-69	1.37298e-68	146.945
RACGAP1	2.04238	2.64582	24.0789	7.51147e-75	6.70581e-74	159.564
APOBEC3C	2.0423	3.87039	35.4497	5.86995e-115	1.84889e-113	251.859
MMD	2.04194	2.82818	24.7444	2.21491e-77	2.14156e-76	165.371
EXOC3L4	2.03825	1.24476	10.9564	4.69022e-24	1.08814e-23	42.9625
ATOH1	2.03823	-4.81124	8.81871	6.64068e-17	1.30022e-16	26.8965
LAYN	2.03674	2.10258	20.7988	4.00619e-62	2.43736e-61	130.324
ARMH4	2.03644	1.06918	17.2862	3.26916e-48	1.37044e-47	98.4423
ADH6	2.03459	-0.258823	11.7975	4.55234e-27	1.1333e-26	50.0099
RASGEF1B	2.03432	2.48806	28.1049	7.84451e-90	1.11592e-88	194.097
FUT6	2.03362	2.63529	13.5872	9.53371e-34	2.77747e-33	64.9859
GSN	2.03217	8.37528	22.6302	2.81036e-69	2.10455e-68	146.661
FA2H	2.032	3.89545	16.4	1.05491e-44	4.03481e-44	89.9894
IGFL4	2.0313	-2.64375	11.8832	2.21851e-27	5.55835e-27	50.8386
MNDA	2.0311	1.60689	12.8338	6.74313e-31	1.83087e-30	58.5917
IRAK2	2.03049	2.74172	18.6561	1.19231e-53	5.71185e-53	110.732
NOD2	2.0297	0.718155	13.1452	4.53918e-32	1.26639e-31	61.3978
P2RY2	2.02952	0.72375	14.7913	2.17393e-38	7.09765e-38	75.9063
ULBP1	2.02899	-2.56267	11.2113	5.86263e-25	1.39099e-24	45.2885
PLS1	2.02855	4.75646	24.844	9.29994e-78	9.14798e-77	166.036
FOXF2	2.0282	1.24389	18.6354	1.44093e-53	6.8928e-53	110.741
THEMIS	2.0277	-1.46044	12.2338	1.14878e-28	2.96128e-28	53.7313
KIAA1755	2.02656	2.05772	19.8004	3.47896e-58	1.8955e-57	121.263
TSPAN2	2.02649	2.24492	14.1406	7.20274e-36	2.21066e-35	69.9117
LRP1	2.02608	7.81624	22.0296	6.06442e-67	4.24857e-66	141.233
CCNA2	2.02585	1.86967	17.403	1.12496e-48	4.77003e-48	99.4055
SEPTIN9	2.02582	7.01814	33.8143	1.28901e-109	3.38884e-108	239.515
MYCN	2.02518	-1.6615	13.1763	3.46477e-32	9.69402e-32	61.8109
PIF1	2.02499	-0.0642885	17.2717	3.73053e-48	1.56084e-47	98.4133
GPR176	2.02425	2.24561	19.0093	4.73519e-55	2.35495e-54	114.025
HLA-DMA	2.02343	4.95201	24.1316	4.72716e-75	4.24533e-74	159.791
OSBPL3	2.0225	4.15474	29.922	2.5465e-96	4.54882e-95	208.866
SCIMP	2.0196	0.655335	13.6383	6.08255e-34	1.77946e-33	65.7021
TRIP13	2.01936	0.966566	15.1039	1.31385e-39	4.43851e-39	78.6775
PCED1B	2.01738	2.34386	21.1811	1.26118e-63	8.01192e-63	133.749
TSPAN18	2.0157	2.69642	18.9688	6.85167e-55	3.3903e-54	113.592
PTPRE	2.01566	3.5208	30.9475	6.6504e-100	1.32737e-98	217.192
SLC16A5	2.01388	3.17646	15.9826	4.68092e-43	1.7246e-42	86.298
ENO1	2.01381	8.58648	24.6145	6.88595e-77	6.53831e-76	164.213
CDHR4	2.01354	-4.55181	12.4041	2.69599e-29	7.07168e-29	55.2337
HOXD9	2.01336	-0.682062	17.1158	1.54849e-47	6.39807e-47	97.0185
DOCK11	2.01246	2.70045	18.9399	8.92184e-55	4.39907e-54	113.328
SNCG	2.01118	2.03989	10.2793	1.05325e-21	2.32156e-21	37.4646
CHST13	2.01107	-2.55857	11.0664	1.91755e-24	4.49728e-24	44.1116
CIT	2.01063	2.02362	19.588	2.4106e-57	1.28198e-56	119.332
SERPINA9	2.00908	-5.02115	11.3243	2.31743e-25	5.54888e-25	46.2166
HDAC9	2.00881	2.2363	17.1193	1.49972e-47	6.19919e-47	96.7654
CLEC9A	2.00856	-2.93207	12.0366	6.09779e-28	1.54639e-27	52.1352
HOXC5	2.00824	-3.59122	10.9138	6.62432e-24	1.52995e-23	42.9051
NIBAN3	2.00797	-1.71401	8.51319	5.91827e-16	1.13181e-15	24.6837
CYBB	2.00745	3.91625	15.7934	2.59989e-42	9.39476e-42	84.4914
ITGAL	2.00667	2.49258	12.7682	1.18801e-30	3.2105e-30	57.8976
PYCARD	2.0063	3.22238	21.8664	2.62689e-66	1.81178e-65	139.809
SERPINB9	2.00537	3.24675	22.7954	6.44506e-70	4.90909e-69	148.122
APOL6	2.00505	4.57859	29.2733	5.03362e-94	8.35094e-93	203.542
NCKAP1L	2.00481	3.30239	15.2667	3.03413e-40	1.04247e-39	79.8178
TNFSF4	2.00468	1.24408	14.1605	6.03385e-36	1.85774e-35	70.2287
PSORS1C2	2.0018	-2.67836	10.2849	1.00797e-21	2.22276e-21	37.893
BTK	2.00091	1.54312	14.2448	2.85419e-36	8.85455e-36	70.9349
SIGLEC8	2.00068	-0.688981	11.5335	4.11103e-26	1.00102e-25	47.8448
MT-CO1	2.00019	13.384	16.3057	2.48663e-44	9.4352e-44	89.5962
LIPM	1.99998	-1.23879	10.3444	6.30503e-22	1.39699e-21	38.2875
THBS1	1.99931	7.64078	12.7954	9.39208e-31	2.54374e-30	57.9641
NRIP3	1.99926	-0.0940313	17.0913	1.93642e-47	7.98237e-47	96.7725
DACT3	1.99843	1.68672	17.0383	3.14203e-47	1.28843e-46	96.1032
VSTM4	1.99752	3.0104	20.3483	2.38381e-60	1.37462e-59	126.115
CD82	1.9968	5.60547	35.179	4.39497e-114	1.35807e-112	249.754
NCR1	1.99617	-4.57622	13.7086	3.27756e-34	9.66663e-34	66.5047
TMPRSS3	1.99433	4.00199	19.4102	1.21868e-56	6.38901e-56	117.451
RAP2B	1.99371	4.21632	43.3179	9.68911e-139	5.7084e-137	306.652
DUSP5	1.99358	4.07474	17.7745	3.77108e-50	1.66657e-49	102.504
ORC6	1.99291	0.309773	16.808	2.56749e-46	1.0272e-45	94.1647
FRMD6	1.99283	4.18737	22.5673	4.92679e-69	3.66697e-68	145.976
PERM1	1.9915	0.0879227	11.3139	2.52435e-25	6.04064e-25	45.9947
TNFRSF10A	1.98564	2.69476	21.6211	2.38547e-65	1.59357e-64	137.669
PLA2G4D	1.98511	-3.20004	11.7446	7.08536e-27	1.75541e-26	49.7023
IFI44	1.98429	3.5767	14.8594	1.18065e-38	3.88715e-38	76.1282
CCNA1	1.98386	-3.10983	12.6434	3.47529e-30	9.29532e-30	57.2835
ELOVL6	1.9835	2.88117	19.7279	6.73389e-58	3.63051e-57	120.489
H2BC4	1.98323	-0.294071	11.9922	8.87358e-28	2.24363e-27	51.6405
PLEKHN1	1.98317	1.29925	11.0564	2.07998e-24	4.87356e-24	43.7631
TPSG1	1.98305	-2.24643	11.6237	1.94309e-26	4.76217e-26	48.6637
EGR3	1.98203	2.41384	11.1235	1.2027e-24	2.83226e-24	44.1407
WFDC1	1.98199	0.518875	12.8817	4.46039e-31	1.21444e-30	59.1429
CD58	1.98163	2.91632	23.7509	1.34892e-73	1.15067e-72	156.637
TBX4	1.98077	-4.18687	10.9365	5.51238e-24	1.27661e-23	43.0782
IL18	1.98041	3.70678	23.2901	7.93555e-72	6.39816e-71	152.461
H2BU1	1.98003	-2.06152	11.1517	9.55041e-25	2.25584e-24	44.7817
CD244	1.97931	-1.711	13.6275	6.68889e-34	1.95451e-33	65.7485
CENPU	1.97893	1.40464	16.0238	3.22079e-43	1.1909e-42	86.9187
CAVIN1	1.97854	6.75588	24.7839	1.56982e-77	1.5307e-76	165.536
CD83	1.97816	2.22083	15.786	2.77995e-42	1.00343e-41	84.6507
PSMB8	1.9772	5.0405	34.1757	8.2723e-111	2.28217e-109	242.211
SPI1	1.97713	3.13223	17.6207	1.53892e-49	6.67583e-49	101.217
FOXD2	1.97663	-0.515465	14.9436	5.54988e-39	1.84211e-38	77.3569
CACNA2D3	1.97593	-0.950383	15.1775	6.77233e-40	2.30297e-39	79.475
PDCD1	1.97573	-0.761392	14.0879	1.14891e-35	3.50973e-35	69.7547
SH2D2A	1.97473	0.983321	17.3365	2.06506e-48	8.68843e-48	98.9118
ZNF385A	1.97455	3.23099	23.9204	3.03015e-74	2.64361e-73	158.091
VEGFC	1.97334	1.76155	19.2074	7.75659e-56	3.94998e-55	115.895
CD248	1.97311	4.81821	18.3925	1.32651e-52	6.21176e-52	108.089
KIAA1549L	1.97231	2.00521	13.8309	1.11608e-34	3.33038e-34	67.2124
DUOX1	1.97014	2.15365	14.029	1.93666e-35	5.8858e-35	68.9377
WIPF1	1.96806	4.61473	24.7159	2.84028e-77	2.73405e-76	164.926
RRAS	1.96626	4.886	32.0808	8.51142e-104	1.92689e-102	226.047
MS4A8	1.96586	1.20057	9.29512	2.0027e-18	4.07541e-18	30.092
MYO1E	1.9656	5.35237	40.3281	4.60468e-130	2.24607e-128	286.6
SHROOM3	1.96498	5.50651	27.5002	1.23756e-87	1.63891e-86	188.774
FPR1	1.96339	2.10932	12.4827	1.3782e-29	3.6385e-29	55.5112
GMFG	1.96315	2.66572	17.8335	2.2005e-50	9.78223e-50	103.224
SUSD3	1.96239	-0.0321069	16.7979	2.81359e-46	1.1236e-45	94.0984
NLRP7	1.96207	-4.74501	11.8676	2.52999e-27	6.33065e-27	50.7117
SOWAHD	1.9616	-1.34456	15.5362	2.66406e-41	9.41105e-41	82.7196
ERAP2	1.96058	3.69215	10.6999	3.71701e-23	8.45208e-23	40.5484
E2F7	1.9603	-0.263094	12.6733	2.68804e-30	7.21137e-30	57.4139
CABCOCO1	1.95999	-2.12602	12.3549	4.10032e-29	1.06965e-28	54.7895
TNF	1.95982	-1.60144	11.2856	3.18559e-25	7.61086e-25	45.8513
CH25H	1.95975	0.766916	12.3556	4.07869e-29	1.06415e-28	54.616
DSG4	1.95943	-4.91101	12.2956	6.79415e-29	1.76111e-28	54.3095
PNPLA1	1.95854	-4.05731	12.518	1.01907e-29	2.69693e-29	56.2108
PMCH	1.95821	-4.87156	13.8056	1.39476e-34	4.14928e-34	67.3527
CAP1	1.95766	7.27941	34.726	1.30246e-112	3.86657e-111	246.438
GPR174	1.95727	-3.03659	10.2103	1.81079e-21	3.96674e-21	37.3275
ARHGAP30	1.95674	3.37723	17.6846	8.57704e-50	3.75233e-49	101.767
PLK4	1.95542	0.565619	18.2256	6.10075e-52	2.81241e-51	107.074
HK1	1.95462	5.48266	39.4028	2.72839e-127	1.19927e-125	280.205
SP6	1.95415	0.806449	13.9578	3.63663e-35	1.09874e-34	68.4933
GPR19	1.95283	-2.0462	14.4512	4.54577e-37	1.44016e-36	73.0348
MPEG1	1.95254	3.10867	12.5907	5.46556e-30	1.45589e-29	56.2848
THEMIS2	1.95142	3.56084	18.628	1.54213e-53	7.37148e-53	110.363
TSTD3	1.95104	-4.0427	13.2606	1.66126e-32	4.68215e-32	62.6029
C12orf56	1.95019	-3.37149	9.0383	1.33999e-17	2.6707e-17	28.5005
GPRIN1	1.94994	1.22771	16.1077	1.50386e-43	5.60509e-43	87.7012
SMPX	1.94771	-3.31331	10.2589	1.23648e-21	2.72083e-21	37.711
ELMOD1	1.94671	-3.49184	12.4903	1.29125e-29	3.41031e-29	55.9825
GNLY	1.94662	0.118863	12.7143	1.88943e-30	5.08284e-30	57.7415
KCNK13	1.94654	-1.71128	13.4177	4.21183e-33	1.20585e-32	63.9164
CFH	1.94579	5.28031	20.7898	4.34455e-62	2.64075e-61	129.91
COL23A1	1.94426	-0.73066	16.6363	1.22764e-45	4.81796e-45	92.6578
EZR	1.94369	7.93968	25.2809	2.09105e-79	2.14141e-78	169.955
PARPBP	1.94355	0.220852	20.7399	6.83353e-62	4.13308e-61	129.994
NDE1	1.94321	3.32859	30.4559	3.41606e-98	6.41866e-97	213.263
RELT	1.94297	1.9473	19.8933	1.49348e-58	8.21266e-58	122.12
LPCAT4	1.9425	5.31199	22.9876	1.16419e-70	9.07594e-70	149.652
KMO	1.9421	-0.84059	14.6822	5.77239e-38	1.86841e-37	75.0376
SQLE	1.94201	4.39448	21.2793	5.19802e-64	3.34012e-63	134.381
CBY2	1.94198	-4.68843	9.1137	7.6934e-18	1.54183e-17	29.0316
TLX2	1.9417	-4.13906	11.5575	3.36804e-26	8.21741e-26	48.1467
XKRX	1.94056	-2.34157	11.6792	1.22408e-26	3.01701e-26	49.1295
GPBAR1	1.93947	1.25505	13.8912	6.54853e-35	1.96486e-34	67.8491
TCEAL7	1.93933	0.285211	18.9564	7.67206e-55	3.78953e-54	113.77
PRB3	1.93771	-4.67178	12.1952	1.59472e-28	4.09729e-28	53.4629
BTNL3	1.93748	-2.84515	6.42806	4.48775e-10	7.30469e-10	11.4055
SORCS2	1.93669	1.96119	14.0373	1.79961e-35	5.47355e-35	69.0361
CD69	1.93501	1.09922	11.147	9.92909e-25	2.34415e-24	44.5205
ACTG1	1.93454	11.4163	18.5802	2.38715e-53	1.13746e-52	110.254
CKAP2	1.93448	2.38102	23.4646	1.69274e-72	1.39646e-71	154.172
ZWINT	1.93432	2.54042	19.4559	8.03819e-57	4.22767e-56	118.053
ARL13A	1.933	-4.13521	13.2587	1.6889e-32	4.75869e-32	62.5847
MAEL	1.93254	-2.75336	12.0279	6.56375e-28	1.66326e-27	52.057
WDR62	1.93191	0.948992	15.7436	4.08114e-42	1.46903e-41	84.441
LPCAT2	1.93035	3.83369	26.1885	8.42977e-83	9.67075e-82	177.73
NFAM1	1.92974	2.19572	15.9505	6.25991e-43	2.29769e-42	86.1434
RUFY4	1.92887	-2.42852	10.9968	3.37708e-24	7.86097e-24	43.5454
SPNS3	1.92746	-0.233732	18.5741	2.52368e-53	1.20047e-52	110.311
SAMSN1	1.92643	1.72161	14.3986	7.26564e-37	2.2885e-36	72.272
ANKRD45	1.92556	-2.56532	11.9368	1.41419e-27	3.56143e-27	51.2868
WAS	1.9253	2.25352	15.2333	4.10009e-40	1.40255e-39	79.6605
CXCL3	1.92516	1.1487	9.55555	2.82624e-19	5.87724e-19	32.0424
ACRV1	1.92472	-4.01778	12.1105	3.26683e-28	8.33541e-28	52.7605
SLC2A3	1.92451	4.45191	16.0321	2.987e-43	1.1055e-42	86.589
GOLM1	1.92307	6.86359	23.5765	6.29183e-73	5.27059e-72	154.936
MTRNR2L10	1.92222	-5.06758	15.7043	5.82695e-42	2.0909e-41	84.2915
SAA4	1.92172	-3.81757	9.48535	4.80528e-19	9.92936e-19	31.7951
C22orf23	1.91962	-0.951073	15.64	1.0428e-41	3.71738e-41	83.6392
MAFF	1.91946	4.39713	21.0555	3.92421e-63	2.46097e-62	132.357
CNTNAP2	1.91922	-0.306604	9.74837	6.50623e-20	1.37447e-19	33.6457
CYP4F12	1.91877	1.89382	10.0725	5.31731e-21	1.15166e-20	35.8752
TMEM132A	1.91836	4.04099	22.2761	6.65762e-68	4.77182e-67	143.381
C19orf84	1.91807	-4.43518	13.6172	7.32515e-34	2.13882e-33	65.7054
TAFA3	1.91771	-4.45821	13.0323	1.21092e-31	3.34165e-31	60.617
ECM2	1.91615	2.43066	15.1753	6.90701e-40	2.34713e-39	79.1114
DUSP6	1.914	4.95082	30.1708	3.40003e-97	6.17498e-96	210.821
SLC7A5	1.9133	4.37421	15.2947	2.3574e-40	8.13096e-40	79.9316
STAP1	1.91242	-1.79118	10.197	2.01024e-21	4.4012e-21	37.1703
CDC42EP2	1.91211	3.36409	23.6508	3.26258e-73	2.75544e-72	155.693
SERTAD1	1.91065	3.67272	25.6064	1.25456e-80	1.33584e-79	172.741
PRKCB	1.91062	1.47726	10.4324	3.1416e-22	7.01561e-22	38.7433
CYTIP	1.91057	2.36089	14.3145	1.53613e-36	4.80364e-36	71.4303
AFAP1	1.91035	4.65177	35.9932	1.05903e-116	3.48146e-115	255.811
TNFAIP8L2	1.90994	0.499898	15.2436	3.73502e-40	1.27901e-39	79.9837
TAFA5	1.90894	2.47982	17.9344	8.74364e-51	3.92171e-50	104.169
FOXJ1	1.90815	0.597167	8.2588	3.52669e-15	6.59547e-15	22.7737
SAMD14	1.90729	0.359755	21.5889	3.18779e-65	2.12158e-64	137.649
IFIT2	1.90633	2.67206	19.7278	6.73992e-58	3.63276e-57	120.511
CLNK	1.90618	-2.27896	9.1747	4.90138e-18	9.87648e-18	29.4617
PKMYT1	1.90329	1.15639	12.0186	7.10175e-28	1.79796e-27	51.7215
MAL2	1.90268	6.44776	25.892	1.07238e-81	1.19384e-80	175.113
IKZF1	1.90002	2.2203	11.6149	2.091e-26	5.12145e-26	48.1965
STEAP1B	1.8995	-3.16705	11.8146	3.94427e-27	9.83051e-27	50.2861
ITGAM	1.89818	3.13413	16.6512	1.0718e-45	4.21056e-45	92.3708
ARHGAP23	1.89691	4.0354	19.7272	6.77626e-58	3.65134e-57	120.33
BNC2	1.89663	2.26711	13.5765	1.04757e-33	3.04873e-33	64.936
C11orf16	1.89616	-4.59029	13.2903	1.28252e-32	3.62517e-32	62.8512
ST8SIA6	1.89595	-3.76046	10.8657	9.77493e-24	2.24832e-23	42.5172
HVCN1	1.89549	1.36365	17.455	6.99493e-49	2.9841e-48	99.9428
R3HDML	1.89423	-5.12744	13.4954	2.13325e-33	6.1489e-33	64.6328
KRT9	1.89363	-5.08421	12.2931	6.9413e-29	1.79854e-28	54.2866
MAP1LC3B2	1.8936	-1.19997	16.616	1.47726e-45	5.78484e-45	92.4942
IFIT3	1.89329	3.65449	18.0038	4.63673e-51	2.09166e-50	104.641
SSPN	1.89326	3.56307	22.094	3.40531e-67	2.39597e-66	141.801
P3H2	1.89312	3.16032	15.0269	2.62424e-39	8.7834e-39	77.6745
KRT8	1.89258	10.0061	16.0534	2.46042e-43	9.13376e-43	87.1024
ZFPM2	1.89221	1.34744	15.0585	1.97682e-39	6.64374e-39	78.2166
AOAH	1.89161	1.46942	12.5527	7.56872e-30	2.00847e-29	56.1973
CALCR	1.88936	-4.39664	12.0592	5.04039e-28	1.28072e-27	52.3218
INSYN2B	1.88919	-4.10829	10.7093	3.44876e-23	7.8494e-23	41.2581
CACNB3	1.88917	3.43285	22.9036	2.45895e-70	1.89881e-69	149.054
JUP	1.88908	7.63341	28.0654	1.09034e-89	1.5432e-88	193.623
TWSG1	1.88759	4.20013	29.4272	1.43029e-94	2.41385e-93	204.82
C8B	1.88621	-3.20804	9.08048	9.82773e-18	1.96494e-17	28.8065
MX2	1.88615	3.85277	19.593	2.30134e-57	1.22454e-56	119.128
MTFR2	1.8849	-0.694453	16.4319	7.89582e-45	3.03066e-44	90.8
B3GALT4	1.88387	2.63353	26.3392	2.32313e-83	2.70639e-82	179.163
RASSF2	1.88374	3.61304	16.237	4.64415e-44	1.74893e-43	88.5413
PYGB	1.88306	6.68941	26.634	1.88135e-84	2.25485e-83	181.48
MYADM	1.88231	6.35848	26.779	5.48877e-85	6.67663e-84	182.693
SHD	1.88187	-4.38036	10.3647	5.37056e-22	1.19183e-21	38.5263
IFI35	1.88147	4.09737	29.0194	4.04405e-93	6.46255e-92	201.484
EDDM13	1.88105	-3.53967	12.7427	1.47961e-30	3.98914e-30	58.1395
B4GALT5	1.8797	5.57552	32.5723	1.83336e-105	4.36259e-104	229.874
CABP4	1.87897	0.737883	13.9787	3.02233e-35	9.14697e-35	68.6852
CLEC11A	1.87878	3.32874	19.2571	4.92858e-56	2.52232e-55	116.129
STEAP1	1.87721	2.93467	19.1052	1.9722e-55	9.91167e-55	114.796
HTRA1	1.87693	6.02958	22.8458	4.11214e-70	3.14932e-69	148.397
APOBEC3H	1.8764	-2.2471	11.2635	3.82012e-25	9.10905e-25	45.7056
SLC12A2	1.8754	5.16466	23.806	8.29555e-74	7.12609e-73	156.905
C1QTNF2	1.87241	-0.39864	16.7101	6.26808e-46	2.48085e-45	93.3185
SPIB	1.87123	1.12125	8.19043	5.66475e-15	1.05406e-14	22.2344
DYDC2	1.87107	-3.29835	10.9308	5.7708e-24	1.33566e-23	43.0429
RGS18	1.87026	-0.733127	12.4075	2.61971e-29	6.87621e-29	55.1743
TNNT1	1.87013	-0.0189409	5.88875	9.52488e-09	1.48807e-08	8.27372
MAB21L3	1.86916	-4.22668	11.0741	1.80016e-24	4.22448e-24	44.1895
SLC39A4	1.86736	3.93942	14.185	4.85632e-36	1.49802e-35	70.0563
CSF2RB	1.86508	2.57321	12.9173	3.27766e-31	8.95031e-31	59.1605
PCOLCE2	1.86473	0.243897	11.0419	2.34088e-24	5.47896e-24	43.7703
TAGLN2	1.86444	8.61949	22.2653	7.33709e-68	5.25306e-67	143.417
ADAMTSL1	1.86403	1.38326	14.1719	5.45733e-36	1.68209e-35	70.3057
ABCG5	1.86401	-3.21909	10.1333	3.30912e-21	7.20222e-21	36.7344
PKD2L1	1.86314	-2.7151	11.4461	8.4828e-26	2.04996e-25	47.2214
CCR1	1.86293	1.55756	13.3133	1.04897e-32	2.96929e-32	62.742
CTTNBP2NL	1.8621	4.12837	35.8346	3.40606e-116	1.10669e-114	254.676
CIBAR2	1.8615	-4.28711	10.9407	5.32766e-24	1.23426e-23	43.1101
RND1	1.86081	1.82532	11.9233	1.58477e-27	3.98434e-27	50.8244
H2BC5	1.85918	2.10497	11.2175	5.57194e-25	1.32298e-24	44.9471
P2RY13	1.85781	-0.0478868	11.523	4.48447e-26	1.09086e-25	47.7289
KPNA2	1.85702	4.09683	27.7929	1.06229e-88	1.45711e-87	191.295
FGD5	1.85684	3.94023	25.3138	1.57234e-79	1.61954e-78	170.177
Z82206.1	1.85651	-4.36736	12.9993	1.61146e-31	4.43571e-31	60.3338
TNFRSF1B	1.85627	4.52772	25.2308	3.22801e-79	3.28682e-78	169.405
ALOX15B	1.85594	0.836562	8.24358	3.91993e-15	7.32389e-15	22.6387
GGTA1	1.85573	1.04948	14.0601	1.4702e-35	4.47651e-35	69.3621
APOBEC3G	1.85558	2.21892	20.2796	4.45095e-60	2.54638e-59	125.591
FBXO32	1.85427	4.99422	21.4697	9.33207e-65	6.12124e-64	136.056
ROR2	1.85394	2.77875	17.5206	3.83906e-49	1.64856e-48	100.344
OR51E1	1.85364	-1.89634	12.6312	3.85805e-30	1.03036e-29	57.1339
CTSC	1.85301	6.01306	29.444	1.24604e-94	2.11383e-93	204.908
KLF2	1.85267	4.28382	16.7162	5.92835e-46	2.34924e-45	92.8122
IGFBP4	1.85245	8.29612	17.2867	3.25282e-48	1.36388e-47	98.155
DNAH8	1.85115	-4.16082	10.5164	1.6112e-22	3.61618e-22	39.726
KRT3	1.85074	-5.06792	12.6183	4.30983e-30	1.15054e-29	57.053
FGL2	1.85054	3.24843	13.5259	1.63217e-33	4.71986e-33	64.3489
HEPHL1	1.8502	-3.06163	9.5469	3.01772e-19	6.27008e-19	32.2546
TUBAL3	1.85015	-3.50283	9.621	1.71973e-19	3.59957e-19	32.8178
SLC18A1	1.85015	-4.8382	10.9538	4.7897e-24	1.11095e-23	43.2075
SHF	1.84996	1.97033	17.2541	4.38285e-48	1.83063e-47	98.0265
LPAR4	1.84969	-3.02388	12.4186	2.38336e-29	6.26257e-29	55.3676
ZNF683	1.84787	-1.5741	10.2201	1.6766e-21	3.67566e-21	37.3402
PDE4C	1.84674	1.89141	8.64164	2.37287e-16	4.5863e-16	25.2556
SIGLEC6	1.84569	-2.2068	10.4377	3.01111e-22	6.7265e-22	39.0794
H2BC7	1.84483	-4.65348	10.3783	4.82333e-22	1.07185e-21	38.6285
DOCK2	1.84477	3.02468	13.4682	2.70664e-33	7.77755e-33	63.8761
ERFL	1.8444	-2.16301	12.3103	5.99808e-29	1.55828e-28	54.4152
SASH3	1.8444	2.57277	12.7843	1.03407e-30	2.79835e-30	58.0161
NANOS3	1.84416	-2.28664	13.6978	3.60556e-34	1.06228e-33	66.3935
ENO2	1.8429	4.35886	19.9203	1.16782e-58	6.43997e-58	122.052
SMIM35	1.84247	-5.21709	14.1377	7.39042e-36	2.26791e-35	70.2774
RHEBL1	1.84247	-1.25773	15.3258	1.78095e-40	6.16557e-40	80.8236
SIAH3	1.84104	-4.43445	11.4374	9.11559e-26	2.20125e-25	47.1511
DCN	1.84068	8.08121	14.0926	1.1022e-35	3.36913e-35	69.3256
LAG3	1.84015	-0.238942	15.2267	4.34852e-40	1.4858e-39	79.8899
RGS4	1.83934	2.21082	11.5176	4.69186e-26	1.14018e-25	47.3909
TSHZ2	1.83695	3.68084	20.1404	1.57626e-59	8.89033e-59	124.13
MYL10	1.83671	-5.19106	15.6571	8.93137e-42	3.18908e-41	83.8644
MRC1	1.8356	3.80648	11.2034	6.25806e-25	1.48373e-24	44.5861
ULBP3	1.83549	-1.82176	13.7015	3.48817e-34	1.02785e-33	66.4069
MALRD1	1.83467	-3.14999	10.3434	6.35428e-22	1.40774e-21	38.3717
PIM2	1.83462	3.08141	18.7465	5.21871e-54	2.52543e-53	111.498
ST6GAL1	1.83381	4.5787	20.4258	1.17977e-60	6.85975e-60	126.631
SLC22A2	1.83326	-4.83536	12.0044	8.00105e-28	2.02459e-27	51.8558
TAC3	1.83321	-3.21148	8.81556	6.79376e-17	1.32966e-16	26.8937
LILRA5	1.83207	-0.0916931	12.5495	7.77775e-30	2.0631e-29	56.3501
SLA2	1.83126	-0.231581	15.32	1.87657e-40	6.49085e-40	80.7292
FCGR2A	1.83098	3.81841	14.9673	4.48603e-39	1.49305e-38	77.0524
MS4A6A	1.83079	3.82131	15.1151	1.18804e-39	4.01697e-39	78.3749
ZNF474	1.82999	-2.81006	11.462	7.43361e-26	1.79863e-25	47.3573
FGF18	1.82896	-0.512764	14.5176	2.5128e-37	8.00494e-37	73.5606
PRXL2B	1.82887	4.56822	27.1376	2.62937e-86	3.33098e-85	185.736
HOXB2	1.8284	2.59096	17.8414	2.04725e-50	9.10302e-50	103.298
UGT3A2	1.8281	-4.75169	12.272	8.30872e-29	2.14943e-28	54.1105
OLFML1	1.82744	2.40401	15.85	1.55667e-42	5.66273e-42	85.196
SPDYE21	1.8273	-4.68973	12.8612	5.32579e-31	1.44805e-30	59.1385
CYBRD1	1.8269	5.79371	18.6998	8.00008e-54	3.84948e-53	110.872
BTN1A1	1.82498	-4.83887	12.819	7.66655e-31	2.08014e-30	58.7741
GNAT3	1.82445	-5.10401	11.8221	3.70357e-27	9.23651e-27	50.329
ITGA1	1.82431	5.283	27.2407	1.10178e-86	1.41969e-85	186.578
CHST11	1.82414	4.17235	18.045	3.18219e-51	1.44116e-50	104.954
PCDH1	1.82357	5.79524	23.8621	5.05953e-74	4.37895e-73	157.398
SPDYC	1.8231	-4.42355	11.019	2.82065e-24	6.58454e-24	43.7395
C3	1.82237	9.24985	10.0697	5.43686e-21	1.17729e-20	35.7566
CALD1	1.82207	7.17324	18.8197	2.67517e-54	1.30327e-53	112.052
H2AC17	1.82194	-4.76561	11.8567	2.77204e-27	6.93188e-27	50.6203
KLF4	1.82097	4.36424	20.5468	3.935e-61	2.32183e-60	127.743
BHLHE41	1.81968	4.34384	22.0911	3.49518e-67	2.45743e-66	141.682
RARB	1.8195	1.6896	19.9222	1.14831e-58	6.33597e-58	122.411
SYCE3	1.81837	-3.50088	10.7472	2.54142e-23	5.80184e-23	41.5711
SAMD5	1.81789	1.69622	12.9786	1.92738e-31	5.29563e-31	59.8195
FFAR2	1.81756	-1.77863	10.4234	3.37332e-22	7.5262e-22	38.9443
IGFBP7	1.81755	8.40688	18.2967	3.18626e-52	1.48071e-51	107.391
PLB1	1.81553	1.14252	22.4982	9.13259e-69	6.74853e-68	145.727
GAS2L3	1.81535	1.26433	17.2722	3.71502e-48	1.55501e-47	98.286
RIN3	1.81532	3.60705	27.019	7.17321e-86	8.96537e-85	184.825
BICD1	1.8151	2.93035	26.9688	1.0971e-85	1.36335e-84	184.481
PIK3IP1	1.81387	4.72314	27.0231	6.92634e-86	8.66789e-85	184.757
PLEC	1.81269	8.60784	19.3022	3.26419e-56	1.68241e-55	116.593
ENPP6	1.81101	-2.48486	11.2742	3.49922e-25	8.35201e-25	45.8061
LCP2	1.81057	3.19345	16.8791	1.34276e-46	5.41646e-46	94.4311
MR1	1.81047	3.89795	37.727	3.68075e-122	1.39526e-120	268.447
LZTS1	1.81031	2.97234	17.0921	1.92205e-47	7.92481e-47	96.4024
TLR10	1.80909	-1.07246	10.3117	8.16064e-22	1.80425e-21	38.0327
KIR2DL4	1.8085	-4.25817	10.8053	1.59203e-23	3.64639e-23	42.023
LCN1	1.80615	-4.84468	11.125	1.18884e-24	2.80064e-24	44.5922
RFX8	1.80572	-1.72903	11.1611	8.84681e-25	2.09167e-24	44.8461
EHBP1L1	1.80515	5.60134	28.3085	1.44096e-90	2.10023e-89	195.529
SERTAD3	1.80453	3.77504	29.8524	4.48079e-96	7.92444e-95	208.324
IFNGR2	1.80415	5.63398	36.2598	1.49771e-117	5.01629e-116	257.741
PRF1	1.80377	1.17715	14.8964	8.47289e-39	2.80185e-38	76.7854
PTPRO	1.80328	0.339648	15.0825	1.59257e-39	5.3663e-39	78.5528
KCTD17	1.80215	2.75375	27.4604	1.73071e-87	2.28118e-86	188.655
YWHAZ	1.79998	8.46844	27.2484	1.0321e-86	1.33166e-85	186.836
GLIPR1L1	1.79947	-3.56071	13.371	6.33792e-33	1.80346e-32	63.5703
MICB	1.79945	0.977556	16.0553	2.42035e-43	8.98672e-43	87.2543
TMEM169	1.79944	-0.474129	15.3674	1.22339e-40	4.2511e-40	81.1681
DDAH2	1.79917	4.85497	30.4694	3.06507e-98	5.7647e-97	213.228
DSC3	1.79916	-0.262589	8.74736	1.11141e-16	2.16332e-16	26.2715
NOS2	1.79916	-1.60325	10.6014	8.18534e-23	1.85071e-22	40.342
CGAS	1.79904	1.89863	21.7982	4.84565e-66	3.31055e-65	139.36
SEPTIN6	1.79896	3.84579	22.005	7.5667e-67	5.28777e-66	140.963
[truncated: 5,196 more rows]
