# Supplementary material for: Machine learning algorithm integrates bulk and single-cell transcriptome sequencing to reveal immune-related personalized therapy prediction features for pancreatic cancer
Source: Aging (Albany NY). 2023 Dec 12;15(23):14109–40. doi: 10.18632/aging.205293 (PMC10756117; doi:10.18632/aging.205293)
Supplement: Supplementary Table 4 [file aging-15-205293-s005.xlsx]

## Sheet: Table S4
Supplementary Table 4. The 1612 IRG signature.
Gene
C11orf52
GTF2H2C
MIA2
IPO4
GET4
GOLGA6L9
IFI30
PRPF40B
S100A6
GLS2
SLC31A2
CBWD6
CYP51A1
TMEM262
CAMK2N1
CHKB-CPT1B
TSPAN1
ABCB6
SULF1
TIMP3
INPP5J
FAM47E
MISP
DPYSL3
CORO2A
CTSS
COL1A1
DBNDD2
COL5A2
COL1A2
POSTN
ZNF593
ELK3
RAC2
ISLR
TRIM45
HTRA3
SPARC
COL3A1
ARHGAP8
APOBEC3C
EPB41L4B
GATD3B
MST1
RAB3D
RTEL1-TNFRSF6B
COL5A1
CCDC189
GIMAP5
RGS10
MCUB
KLF5
GNAI2
THBS2
MBOAT2
FAM86B1
TBC1D30
DDTL
NRG4
S100A5
LAMA4
NRTN
CTHRC1
PLAU
FBXL8
RAB31
PLEKHH1
ARL4C
COL10A1
ANTXR1
HLA-DPB1
B3GNT3
ENDOG
PLEKHH3
CDH11
LTBP1
CORO1C
SLC6A6
LGMN
HLA-DRB1
GRAMD1C
LGALS1
KRTCAP2
HOOK1
F2R
CMTM3
AOX1
ARHGDIB
VCAN
BST2
EPHX4
CTAGE4
MSH5-SAPCD1
CTSB
FERMT1
AGR2
CTSZ
OLFML2B
C19orf33
LSMEM1
IMPA2
LEF1
LBH
INHBA
MRPS24
PEA15
ANXA1
ENKD1
CTSK
GPX8
AOC1
DNMT3B
GPT2
ICAM3
SEMA3C
FN1
HOPX
IZUMO4
FXYD3
SERPINH1
COL8A1
GCAT
EMP3
SLC15A3
BICDL2
CAPN5
E2F8
CTSC
SELPLG
HLA-DRA
FAM83F
CEACAM1
HSF4
THY1
TPRN
LITAF
ITGA3
WNT2
BGN
GM2A
HLA-DQA1
ZDHHC11B
PTAFR
MYH14
STYK1
CHAD
NEK2
C1orf54
CD74
DTL
TMEM131L
RFTN1
FAM221A
TIMP1
COL16A1
SYTL1
KCNK1
EXO1
DNAJC5B
COMTD1
CDC25C
RPH3AL
LUM
SKA3
SLC22A5
PIMREG
IFI16
WBP1L
AXL
PRSS16
HOOK2
CCL22
FBN1
FOXP3
SHROOM3
PALLD
AEBP1
CCDC85C
CCL17
NTM
PRSS23
CALML6
MRC2
ITGA1
PDF
CHSY1
NINJ2
RIN3
PIK3IP1
MXRA8
EDNRA
HLA-DQB2
FSCN2
STBD1
PLEKHO1
CCDC183
NMU
PLXDC2
CENPF
MST1R
PLA2G2D
NHSL2
COL4A2
ARHGAP33
PPP1R18
SDC3
CCL18
NUF2
DMBX1
FOXL1
SFRP4
PABPC1L
HSD17B3
CILP2
KIF14
SFXN2
CXCR4
GPR132
LAPTM5
HJURP
MAL2
C11orf86
SLC25A10
FUT1
RAB8B
LAMP5
ANKRD24
GPSM3
TMEM125
C1GALT1
ANLN
BASP1
KCNJ8
HLA-DPA1
MMP9
ASPM
DNAH3
AJM1
MSN
PXDN
ABHD17C
CMTM8
LOXL1
RAB40C
RGL3
TNFRSF9
AATK
TNFRSF1B
CNTD1
TNFAIP6
COMP
SLC45A3
ASPN
DEPDC1B
RAB34
ATP6V0D2
FTL
PLS1
PRDM1
LXN
CAVIN1
CDC45
RDM1
MMD
HLA-DQB1
DKK2
WIPF1
CENPA
CRYBG2
KPNA7
CELF5
OR2A7
PLA2G7
ADAM19
GPNMB
ITGB2
OCLN
TBXAS1
LZTS3
DCSTAMP
PHKA1
AP1S1
HAPLN3
C1QA
ZDHHC23
RAP1GAP2
TMIGD3
HID1
HLA-DMA
CRACR2B
GBP4
FSTL1
MAP3K21
UQCRHL
CGNL1
BSPRY
ZNF385A
USH1C
HLA-DRB5
SFRP2
PIP4K2A
RAB42
COL4A1
PCDH1
NNMT
RCN3
HSD17B8
CCL14
CCR4
ADAMTS2
MSH5
CTLA4
ETS1
BMP2K
CXCR3
CCR8
FRMD5
MZF1
ITPRIP
TYROBP
GEM
TCEA3
TNIP3
FAM83E
ASS1
GPR68
RAB32
ROBO1
PNOC
RNF144A
GDPD2
LSP1
LAP3
IL2RA
SERINC2
BTG2
SLFN5
COL8A2
FAM174B
GIMAP2
KIF15
RIPPLY3
LENG9
LPCAT4
PLXNA2
CLCN1
WNK2
TIGIT
SPAG4
NEDD4L
AKR7A3
EPB41L1
NECAB3
MAP1A
HTRA1
FNDC1
SERPINB9
C3orf80
BEST1
SIRPG
DHDH
CEACAM19
NOX4
B4GALNT3
MGAT4A
GBP1
HOXB9
DOK5
CENPK
TNC
HNF1A
DHRS13
LTBP2
HMOX1
EMILIN2
CYP27A1
LCP1
CD300LF
HLA-E
TDO2
KIAA1958
IQGAP3
CREG2
MNX1
MEI1
ACY1
FBLN2
ZNF488
THSD7B
SSPN
LRP1
GLIPR2
MYL9
HSPB9
STK17B
TM7SF2
PRR22
MDFIC
C19orf73
TTK
LAD1
ADGRE3
TTYH2
SRGN
APOE
RORC
CD1E
EMP1
SRCIN1
PLEKHO2
NEIL1
MAD2L1
BST1
ZNF784
HTRA4
CD300A
RCCD1
IGFBP5
ACTA2
BCL2A1
IL12RB1
PROCR
PMP22
MOXD1
FMOD
PLXNB1
ADAMDEC1
ELOVL5
SH3RF1
APOC1
PBK
GREM1
PRR15
RAB33A
SHH
LCK
LRRC31
PAK6
IGSF6
APOBR
TGFB1
DKK4
CD4
PLEKHA2
GALE
COL27A1
BLACAT1
INF2
MAF
EVPL
SRPX2
CATSPER2
ADAM12
MAMDC4
MATN3
LY96
DACT1
ALG1L2
ANOS1
GAL3ST4
PRRX1
CD1C
KCTD14
C2
PRR4
LRRC32
CFH
EMILIN1
GZMA
FABP3
ENTPD1
CAPN8
ZNF692
ARSI
VAV1
ICOS
MLPH
CD86
CRYM
PLIN4
ANKRD18A
KCTD12
TMEM200A
NCF2
PPM1K
MTFP1
PLXNC1
GPC6
DUSP8
SPC24
FYN
RENBP
CLEC2B
TMEM44
ZNF888
TFAP2A
ST6GAL1
CALHM5
HCAR1
BIRC3
ADAMTS13
MUC12
WFDC2
VSTM4
SLAMF7
AIF1
CAMK1D
CCDC69
CD28
LMCD1
STAT1
MMP2
EGR2
TREM1
PAM16
KLRB1
CD52
CD302
PROC
ARL11
ARID5B
LIME1
KIFC2
CD3D
COL6A3
LIPA
CERKL
C3orf52
P2RY10
SERPINE2
CSF2RA
CYSTM1
GGT5
FAAH
NCR3
RELT
CRTAM
PRRG4
CD68
PTPRH
KIAA1755
ZNF385C
HLA-DMB
HLA-DOA
JAM3
TMEM184A
IFIT2
ELOVL6
FLVCR2
RNF223
RAP1GAP
FLRT2
FCER1A
MAGIX
GLI1
C1QC
C1QTNF1
TNFSF18
C17orf100
CIT
ZNF774
GLT8D2
PDE6G
IDO1
PDPN
NSUN7
ASPHD2
ACP5
SELENOP
CCL5
HPGDS
LILRA4
ZBTB42
IL4I1
TIMP2
CD3G
IL21R
L3MBTL1
MACROD1
TMC7
C9orf50
IRF8
CLEC11A
PITX1
VEGFC
FGF10
RHPN2
CXCR5
GPT
WFDC10B
P4HA3
CPXM1
LY86
TCN2
SH2D1A
C1orf116
MGST2
D2HGDH
ALPK2
ITGA5
LST1
NTF4
LDLRAD1
SHISAL2A
FCER1G
COL6A2
ZNF524
GPR35
CD180
EFEMP2
KIAA0895
KRTDAP
DOCK11
KCNJ5
GALNT4
NUPR1
ASCL5
BIK
GINS1
FBXO16
RASSF4
PDCD1LG2
CALD1
APLNR
GZMH
ST8SIA4
ANKRD55
FAS
TCF4
TNFRSF8
KIRREL1
PIM2
PSAP
CD14
CST7
FCGR3A
SYT11
C5orf63
CYBRD1
FUT3
FN3K
THEMIS2
SRRM5
LDHD
PLK1
UBASH3A
RAB41
CALHM6
C1QB
RAB25
FEZ1
BCAN
ALOX5AP
AURKA
FAM155B
SLC7A4
IL2RB
NPM2
PTPN3
SRMS
TMEM145
HAVCR2
LDHB
CD248
STAC
ICA1
SIT1
POC1A
CXCL10
CEACAM21
SGK2
IGFBP7
PTGS1
TRANK1
CDS1
HEYL
PCOLCE
CXCL5
MYO5C
TRAT1
DSG2
LILRB4
PPL
CA14
PDGFRB
MROH6
PTK6
HAS2
FAM160A1
TREM2
SPON1
PPP1R16A
CHST11
COL14A1
TMEM119
SPN
ARHGAP45
FCRL3
XDH
HACD4
PCP2
MUC3A
SGK1
PIK3CG
SDS
TM4SF5
GMFG
PLD4
CCNO
CD163L1
SH3PXD2A
LRRC8C
SP140
SH3YL1
ATP6V1C2
PTGER4
DUSP5
HCK
CCL4L2
RPS6KL1
ESRP2
ARHGAP30
CAPN9
ARHGEF5
SNX20
SAPCD2
ZNF521
FDCSP
SIPA1
STOM
SPI1
SPACA4
C4B
RAD54B
CPXM2
ROR2
MSR1
HVCN1
SCPEP1
GZMB
CD40LG
SERPINE1
SCARA3
ESYT3
BANK1
GNB4
EPCAM
NME8
UBXN10
ARHGEF28
E2F1
RNF175
KLHL31
SLC16A6
RIBC2
C15orf65
IGFBP4
MILR1
LOX
HSD17B14
FYB1
RUNX3
ZEB1
GSTO2
CD53
MSRB3
TYMP
ARHGAP15
LZTS1
CALHM2
PIK3R6
FAP
RGS1
DPEP2
MXD3
RHOH
FOXM1
TMEM52B
FEZF1
IRX5
MZB1
C16orf54
KLHDC9
IL3RA
CD300C
MOGAT2
NKG7
CAMSAP3
CNTNAP1
LCP2
OSCAR
IL27RA
TIMD4
EVI2A
SUSD3
ATOH7
SPOCK2
PHACTR1
BFSP2
NPL
C1QTNF2
CPNE5
TNFSF13B
TESPA1
WFDC3
TLR7
SLAMF8
MUC5AC
ITGAM
SESN1
PPM1N
GAS7
MFGE8
CD2
CD6
ENTPD2
CDT1
VAV3
BTLA
XK
PWWP2B
MFAP5
LANCL3
HLA-DQA2
FCRLA
CCR3
SPINT2
MROH1
ATP1B1
F2RL1
GPR183
FABP6
NES
FA2H
CD300LB
CD93
LHB
PRDM16
CD247
FRZB
LY9
CPVL
TAGAP
CXCL9
PTPN20
HMCN1
DYSF
NUGGC
CD7
C1S
RASSF2
FLNA
AIM2
RAB17
LPIN3
SYTL3
CATSPERB
SLC4A11
LGALS9B
WBP2NL
LYSMD4
RASAL1
FREM1
RASSF10
CD96
CCDC80
PLEKHA6
FNDC11
TNFRSF17
SLC2A3
SFTPD
JCHAIN
CCIN
SLC16A5
TIFAB
NFAM1
KCP
CNR2
EBP
KLC3
BAIAP2L2
MFNG
SELL
EPS8L1
ITGAD
HLA-DOB
XCR1
OLFML1
OLR1
RSAD2
TDRD10
RGS19
CD83
CYBB
HTR2A
WDR62
GZMM
P2RY6
PLPP2
PTPN7
SYT12
FPR3
FCN3
EVX1
TRPM4
CD27
BTBD16
CRYBB1
STRC
LTA
S1PR4
LTB
INHA
ATP2C2
TROAP
CXCL12
VAMP5
PPDPF
SCN4A
HSD11B1
LAX1
CD1B
TPM2
RXFP4
SLC2A5
ABI3
CLECL1
CCDC3
PTGIS
JPH1
PRKCQ
ICAM1
ANKS4B
TCF23
CHI3L2
ARHGAP31
DTX1
FAM107A
SLA2
EVI2B
GRAMD2A
ARHGAP25
CTSW
CCDC153
OSM
CLDN11
RNF183
DSE
TNFAIP8L2
ADGRA2
PTCRA
NCKAP1L
CYP1B1
DERL3
WAS
TREML2
PCDH20
KCNAB2
TNFSF8
PDE1A
RNASE6
ADGRE1
ECM2
KLHL5
TIE1
TRIP13
SLAMF6
PTPRO
CD19
MS4A6A
MYLK
CCL13
ZDHHC11
CD5
PSMC3IP
DHRS11
LRRC55
WDR90
CCL7
FOXD2
TLR6
GINS2
TUBA1A
FCGR2A
C11orf53
ITGAX
GAP43
DCST1
CD3E
PRF1
CD48
ITGA4
FOXA2
CLDN4
NPAS2
MAP3K9
ARHGEF38
GPR141
IL24
LAIR1
AKAP12
CRISPLD2
HS3ST2
ADAM22
TFF3
DOC2B
ELL3
RASL12
KMO
FLT3
IGF1
GZMK
WT1
BATF3
THOC3
C17orf113
TPO
CSF1R
CCL3
ADAM23
INPP5D
GPX3
MEF2C
CAPRIN2
ABCA9
ARRDC5
CYB561
CA13
HPDL
HR
LSR
MYO1G
SAMSN1
LMNTD2
GBP5
KLHL6
ID1
FAM110C
CYTIP
RARRES1
LHFPL6
PLTP
CXCL13
GNGT2
XCL2
TRPV2
MCTP1
BTK
RCSD1
PLEK
POU2AF1
PDE4B
MGP
SESN3
RARRES2
ADAMTSL1
TNFSF4
LOXL3
SLC39A4
BCL6B
PDCD1
KLHL4
TMEM71
DCN
DNASE1L2
SORCS2
ANKEF1
FUT7
ITGA9
CYGB
CABP4
LCN12
MYO1F
CACNG6
DDR2
ZMYND10
ZIC2
LRRK2
ALDH3A1
LGALS9C
LAT2
SMPDL3B
GAREM1
TRPM2
MOCOS
TLR4
DOK2
IRF4
SLC37A2
CNN1
CORO1A
CLEC17A
CCDC102B
CCL8
ADPRHL1
SHANK2
GREB1L
CAMP
ARFGEF3
SLC47A1
NLRP3
TMC8
CHIT1
HES6
SYNE1
CD244
SCIMP
CALCRL
P2RY14
SNAI1
SLA
C1R
JAK3
SAPCD1
ID4
RETN
BNC2
C5AR1
PYHIN1
GPR65
FGL2
GAPT
ZEB2
MACC1
A2M
FCRL2
CXCL8
COL19A1
KCNK13
DOCK2
ADD2
ITIH3
TP53AIP1
TCL1A
FHDC1
CCR1
GPR18
RAB3IL1
TNFRSF13B
TMEM114
PTPRC
DMKN
AQP1
PI15
TNFRSF13C
GJA5
LMO2
C11orf80
MYCN
NCF4
RASGRF2
NOD2
FAM180A
WDFY4
ITGBL1
TMEM270
PDLIM3
IGLL5
BIN2
FCRL5
IL7R
SLC8A1
KLF12
PKP3
MSC
FASLG
LRRC25
PECAM1
CPED1
RFLNB
TLR8
FMNL1
CSF2RB
MCEMP1
ADAM33
CNRIP1
CDHR5
MNDA
MARCO
VSTM1
ZFPM1
APOL4
CCR5
CD79A
SASH3
IKZF3
C9orf43
THBS1
ITGAL
PRSS22
GNG2
PALM3
GLIPR1
IL10RA
FLNB
E2F7
RASL11B
UGT1A1
ETV4
XIRP1
TRIM22
FAM78A
AQP9
ADA2
TEDC2
CD80
FOLR2
JAML
LILRA5
MPEG1
MAP1B
GFPT2
AOAH
SLFN12L
MERTK
PLEKHG6
PREX1
TRIM54
FBXL7
FPR1
FOXA1
RGS18
SPATA6L
ETV2
ATG9B
DOCK10
CH25H
RNASE1
CD200R1
AOC3
COL15A1
NFATC2
MMEL1
FAAH2
MAST1
IFITM1
C3AR1
ALKAL1
THEMIS
PHACTR3
EGR4
TIAM1
HCAR2
TSPAN11
PIWIL1
PAX5
CLEC9A
CYTH4
PKMYT1
CENPS-CORT
MUC1
PPP1R1C
ADH1B
RCOR2
PIM1
SIGLEC12
AMN
HCLS1
C14orf180
TTC6
PPP1R9A
FCGR2B
PLA2G4D
CTAGE15
MS4A4A
PLA1A
SIM2
SUSD2
CCR7
KAAG1
LIMD2
MS4A7
CCL4
MAP4K1
MDGA1
TMEM253
TNFAIP2
IKZF1
DOC2A
RAPGEFL1
KCNMB1
DTHD1
PSTPIP1
AMH
SIGLEC8
EPHA3
P2RY13
CIITA
HRH2
MYPN
IRAK3
TAGLN
TXLNB
SMIM22
GIMAP4
PADI2
ADAMTSL5
GOLT1A
PERM1
SOCS3
MAN1C1
ADAMTS10
PPP1R36
TNF
ENPP6
SYT17
APOBEC3H
ZNF804A
GPR171
FAM20A
CLIC2
RAMP2
FCMR
ZC3H12D
RGS16
SIGLEC7
VPREB3
MRC1
CD69
KCNK7
SLAMF1
ADAMTS4
RAB27B
TCAP
CCL19
EGR3
VCAM1
MAFB
ADORA2B
FCRL1
PCOLCE2
PLEKHN1
CXCR6
DNAH2
LRFN4
FLI1
CD37
PCLO
MATK
VIM
IFNG
STX11
TMEM255A
COL6A1
ASB2
DHH
SCN2B
SPEF1
SYCE3
PCSK4
FAM83B
LYL1
HAS1
CASS4
C11orf91
KLHL23
OMP
C1orf162
REEP6
CYP2J2
SLC27A2
S100B
SCARF2
RASAL3
PRKCB
SPATC1
CLEC4C
KCNH8
OMD
CFAP99
SLC17A9
CLEC4A
ANK1
DUSP2
CEBPE
PRICKLE4
TLR10
CLMP
LRRC18
C12orf42
PSORS1C2
FPR2
IL1B
C2CD4C
TENM3
RUBCNL
GPR174
STAP1
TNNT3
ATP6V1FNB
GLDN
CDC6
MACROD2
TRIM46
HSD11B2
PLIN1
LIPN
COLEC12
NAV3
FIBIN
CXCL2
TNFAIP8L3
MFAP4
EFNA3
CYP4F12
SLC9A9
C3
SAMD11
PTX3
SPIRE2
GRAP2
IGSF9
CD200
GPR20
CD38
GPR84
OR2B6
GTSF1
CLEC12A
STX1A
F13A1
CR2
LBX2
RNF224
AFF3
LEXM
RASGRP1
GAD1
CD22
CCK
MMP19
SIRPB2
PLCB2
GLOD5
CD36
TMEM190
ITK
NTRK2
CD79B
TMEM61
PLAC9
SELP
SLC22A18
SMPD3
IL16
IL10
LILRA2
CETP
SPATA17
EBI3
SIRPB1
CLEC10A
LYVE1
DAZL
OTX1
KLRG1
HCST
LILRB1
GXYLT2
CES3
TMEM38A
FAM43B
BLK
ALOXE3
BMP6
MCIDAS
PILRA
SLC6A8
THBS4
CGB7
SIGLEC9
FCER2
CD8B
TBX21
CD1D
IGSF5
ANK2
GLTPD2
DIO3
CD8A
SULT1C3
LRRC26
CCR2
PRELP
P2RY8
SLC23A3
ANGPTL1
NRK
CLEC6A
ABCD2
CTXN1
GPRC5D
FBLN1
P2RY12
CELF2
CD226
RIPOR2
NLGN4X
ABI3BP
CR1
NUDT10
KRTAP5-1
NEFH
ATP1A2
SLIT2
CXCR2
CHRNA6
FOSB
MEOX1
KCNA3
CYSLTR1
ALG1L
PIK3R5
ISM1
CLEC5A
CRYBB3
FAM81B
TRAF3IP3
TFEC
SPIB
VSX1
THRSP
AGTR2
VWA2
VIT
KLHL14
MS4A1
AQP2
PLN
METTL27
UGT1A9
ADIPOQ
RNF39
PLA2G5
SIGLEC1
CCL21
RNF103-CHMP3
RGS2
RNASE2
CYP2W1
ALOX12B
SUSD5
IL5RA
PRG4
SP5
SCRG1
CLEC4E
TTC24
PLA2G4F
FKBP5
MAPK15
SIGLEC10
CD300E
AHSG
CNR1
CA9
FCN1
CFD
IL33
CES1
SYNPR
ITPKA
SHISA3
ARHGEF35
RNASE3
CLEC4D
SCARA5
F12
SAA1
AMPD1
SLC9C2
RP1L1
C7
ZNF831
SPTA1
TRARG1
GPR15
LY6G6C
S100A12
CTSV
IL6
FAM86B2
CD209
SIGLEC14
HS3ST5
HAS3
CXCR1
ADAMTS8
CLC
PNCK
CCL11
GAS2L2
TNNT1
SIGLEC5
NR4A3
CCL23
TDRD5
SYT8
MEDAG
OGN
FOXH1
CALHM3
FOLR3
KISS1
FCGR3B
SELE
ANGPTL7
FABP4
CTSG
SAA2
NTSR1
LEP
