# Supplementary material for: Machine learning algorithm integrates bulk and single-cell transcriptome sequencing to reveal immune-related personalized therapy prediction features for pancreatic cancer
Source: Aging (Albany NY). 2023 Dec 12;15(23):14109–40. doi: 10.18632/aging.205293 (PMC10756117; doi:10.18632/aging.205293)
Supplement: Supplementary Table 5 [file aging-15-205293-s006.xlsx]

## Sheet: Table S5
Supplementary Table 5. Published PC classifications prediction.
Sample ID	TIME subtype	Bailey's classification	Collisson's classification	Moffitt's tumor classification	Moffitt's stromal classification	Puleo's classification	Li's classification
exp_tcga_TCGA-2J-AAB1-01A	Immune_desert	progenitor	Exocrine_like	Classical	Normal	Pure classical	Nonimmune Class
exp_tcga_TCGA-2J-AAB4-01A	Immune_desert	squamous	Exocrine_like	Classical	Activated	Pure classical	Nonimmune Class
exp_tcga_TCGA-2J-AAB6-01A	Immune_desert	ADEX	QM_PDA	Basel_like	Activated	pure basal-like	Nonimmune Class
exp_tcga_TCGA-2J-AAB8-01A	Immune_desert	ADEX	Classical	Classical	Activated	Pure classical	Immune Class
exp_tcga_TCGA-2J-AABA-01A	Immune_desert	immunogenic	Classical	Basel_like	Normal	Pure classical	Immune Class
exp_tcga_TCGA-2J-AABE-01A	Immune_desert	ADEX	Classical	Basel_like	Activated	Stroma Activated	Immune Class
exp_tcga_TCGA-2J-AABH-01A	Immune_desert	progenitor	Exocrine_like	Classical	Activated	Pure classical	Nonimmune Class
exp_tcga_TCGA-2J-AABI-01A	Immune_desert	ADEX	QM_PDA	Basel_like	Activated	pure basal-like	Immune Class
exp_tcga_TCGA-2J-AABK-01A	Immune_desert	squamous	Exocrine_like	Classical	Normal	Pure classical	Immune Class
exp_tcga_TCGA-2J-AABO-01A	Immune_desert	ADEX	Exocrine_like	Basel_like	Absent	Stroma Activated	Immune Class
exp_tcga_TCGA-2J-AABU-01A	Immune_desert	ADEX	QM_PDA	Basel_like	Absent	pure basal-like	Immune Class
exp_tcga_TCGA-2J-AABV-01A	Immune_desert	squamous	Exocrine_like	Classical	Normal	Immune classical	Immune Class
exp_tcga_TCGA-2L-AAQA-01A	Immune_desert	progenitor	Classical	Basel_like	Activated	Pure classical	Nonimmune Class
exp_tcga_TCGA-2L-AAQE-01A	Immune_desert	ADEX	QM_PDA	Basel_like	Absent	Stroma Activated	Immune Class
exp_tcga_TCGA-2L-AAQI-01A	Immune_desert	progenitor	Exocrine_like	Basel_like	Normal	Pure classical	Nonimmune Class
exp_tcga_TCGA-2L-AAQJ-01A	Immune_desert	progenitor	Classical	Classical	Normal	Pure classical	Immune Class
exp_tcga_TCGA-2L-AAQL-01A	Immune_desert	squamous	Exocrine_like	Classical	Normal	Pure classical	Nonimmune Class
exp_tcga_TCGA-3A-A9I5-01A	Immune_desert	squamous	Exocrine_like	Basel_like	Normal	Immune classical	Immune Class
exp_tcga_TCGA-3A-A9I7-01A	Immune_desert	immunogenic	Exocrine_like	Classical	Absent	Pure classical	Immune Class
exp_tcga_TCGA-3A-A9I9-01A	Immune_desert	squamous	Exocrine_like	Classical	Absent	Pure classical	Nonimmune Class
exp_tcga_TCGA-3A-A9IC-01A	Immune_desert	ADEX	QM_PDA	Basel_like	Activated	Stroma Activated	Nonimmune Class
exp_tcga_TCGA-3A-A9IH-01A	Immune_desert	progenitor	Classical	Basel_like	Normal	Stroma Activated	Nonimmune Class
exp_tcga_TCGA-3A-A9IU-01A	Immune_desert	ADEX	Exocrine_like	Basel_like	Activated	pure basal-like	Immune Class
exp_tcga_TCGA-3A-A9IZ-01A	Immune_desert	ADEX	Exocrine_like	Basel_like	Activated	Stroma Activated	Nonimmune Class
exp_tcga_TCGA-3A-A9J0-01A	Immune_desert	ADEX	Classical	Classical	Activated	Stroma Activated	Immune Class
exp_tcga_TCGA-3E-AAAZ-01A	Immune_desert	progenitor	Exocrine_like	Classical	Absent	Pure classical	Immune Class
exp_tcga_TCGA-F2-6879-01A	Immune_desert	progenitor	Classical	Classical	Activated	Pure classical	Nonimmune Class
exp_tcga_TCGA-F2-A44G-01A	Immune_desert	ADEX	Exocrine_like	Basel_like	Activated	Stroma Activated	Nonimmune Class
exp_tcga_TCGA-F2-A8YN-01A	Immune_desert	ADEX	Classical	Basel_like	Activated	Stroma Activated	Nonimmune Class
exp_tcga_TCGA-FB-A545-01A	Immune_desert	ADEX	QM_PDA	Basel_like	Activated	pure basal-like	Nonimmune Class
exp_tcga_TCGA-FB-A78T-01A	Immune_desert	progenitor	Exocrine_like	Classical	Normal	Pure classical	Nonimmune Class
exp_tcga_TCGA-FB-AAPQ-01A	Immune_desert	progenitor	Classical	Classical	Normal	Pure classical	Nonimmune Class
exp_tcga_TCGA-FB-AAPU-01A	Immune_desert	progenitor	Classical	Classical	Normal	Pure classical	Immune Class
exp_tcga_TCGA-FB-AAQ0-01A	Immune_desert	progenitor	Classical	Classical	Absent	Pure classical	Nonimmune Class
exp_tcga_TCGA-FB-AAQ1-01A	Immune_desert	squamous	Exocrine_like	Basel_like	Normal	pure basal-like	Nonimmune Class
exp_tcga_TCGA-FB-AAQ2-01A	Immune_desert	ADEX	QM_PDA	Basel_like	Absent	pure basal-like	Immune Class
exp_tcga_TCGA-FB-AAQ3-01A	Immune_desert	progenitor	Exocrine_like	Classical	Absent	Pure classical	Nonimmune Class
exp_tcga_TCGA-FB-AAQ6-01A	Immune_desert	progenitor	Classical	Classical	Activated	Pure classical	Nonimmune Class
exp_tcga_TCGA-H6-8124-01A	Immune_desert	ADEX	QM_PDA	Basel_like	Activated	pure basal-like	Nonimmune Class
exp_tcga_TCGA-HV-A5A3-01A	Immune_desert	ADEX	Classical	Basel_like	Activated	pure basal-like	Nonimmune Class
exp_tcga_TCGA-HV-A5A4-01A	Immune_desert	progenitor	Classical	Classical	Activated	Pure classical	Nonimmune Class
exp_tcga_TCGA-HV-A5A6-01A	Immune_desert	ADEX	Classical	Classical	Activated	Stroma Activated	Nonimmune Class
exp_tcga_TCGA-HV-A7OL-01A	Immune_desert	progenitor	Classical	Basel_like	Absent	Pure classical	Immune Class
exp_tcga_TCGA-HV-AA8V-01A	Immune_desert	ADEX	Classical	Basel_like	Activated	Stroma Activated	Nonimmune Class
exp_tcga_TCGA-HV-AA8X-01A	Immune_desert	progenitor	Classical	Classical	Activated	Pure classical	Nonimmune Class
exp_tcga_TCGA-HZ-7919-01A	Immune_desert	progenitor	Exocrine_like	Classical	Activated	Pure classical	Nonimmune Class
exp_tcga_TCGA-HZ-A49I-01A	Immune_desert	immunogenic	Classical	Classical	Normal	Pure classical	Immune Class
exp_tcga_TCGA-HZ-A4BK-01A	Immune_desert	progenitor	Exocrine_like	Classical	Activated	Pure classical	Nonimmune Class
exp_tcga_TCGA-HZ-A77O-01A	Immune_desert	ADEX	Exocrine_like	Basel_like	Absent	Stroma Activated	Nonimmune Class
exp_tcga_TCGA-HZ-A8P1-01A	Immune_desert	progenitor	Classical	Classical	Normal	Pure classical	Nonimmune Class
exp_tcga_TCGA-HZ-A9TJ-01A	Immune_desert	progenitor	Classical	Classical	Normal	Pure classical	Nonimmune Class
exp_tcga_TCGA-IB-7644-01A	Immune_desert	progenitor	Classical	Classical	Absent	Pure classical	Nonimmune Class
exp_tcga_TCGA-IB-7887-01A	Immune_desert	ADEX	Classical	Basel_like	Activated	Pure classical	Nonimmune Class
exp_tcga_TCGA-IB-A5SP-01A	Immune_desert	progenitor	Exocrine_like	Classical	Normal	Pure classical	Nonimmune Class
exp_tcga_TCGA-IB-A6UF-01A	Immune_desert	squamous	Exocrine_like	Basel_like	Normal	pure basal-like	Nonimmune Class
exp_tcga_TCGA-IB-A6UG-01A	Immune_desert	squamous	Exocrine_like	Basel_like	Normal	pure basal-like	Immune Class
exp_tcga_TCGA-IB-A7LX-01A	Immune_desert	ADEX	QM_PDA	Basel_like	Absent	pure basal-like	Nonimmune Class
exp_tcga_TCGA-IB-A7M4-01A	Immune_desert	ADEX	QM_PDA	Basel_like	Normal	pure basal-like	Immune Class
exp_tcga_TCGA-IB-AAUN-01A	Immune_desert	ADEX	Exocrine_like	Basel_like	Activated	Stroma Activated	Immune Class
exp_tcga_TCGA-IB-AAUO-01A	Immune_desert	ADEX	QM_PDA	Basel_like	Absent	pure basal-like	Nonimmune Class
exp_tcga_TCGA-IB-AAUQ-01A	Immune_desert	ADEX	QM_PDA	Basel_like	Activated	Stroma Activated	Nonimmune Class
exp_tcga_TCGA-IB-AAUU-01A	Immune_desert	progenitor	Exocrine_like	Classical	Activated	Pure classical	Nonimmune Class
exp_tcga_TCGA-L1-A7W4-01A	Immune_desert	ADEX	QM_PDA	Basel_like	Activated	pure basal-like	Nonimmune Class
exp_tcga_TCGA-LB-A7SX-01A	Immune_desert	progenitor	Classical	Basel_like	Normal	Pure classical	Immune Class
exp_tcga_TCGA-LB-A8F3-01A	Immune_desert	squamous	Exocrine_like	Classical	Normal	Stroma Activated	Nonimmune Class
exp_tcga_TCGA-M8-A5N4-01A	Immune_desert	ADEX	QM_PDA	Basel_like	Activated	Stroma Activated	Nonimmune Class
exp_tcga_TCGA-OE-A75W-01A	Immune_desert	progenitor	Classical	Classical	Activated	Pure classical	Nonimmune Class
exp_tcga_TCGA-PZ-A5RE-01A	Immune_desert	ADEX	Classical	Classical	Activated	Pure classical	Nonimmune Class
exp_tcga_TCGA-Q3-AA2A-01A	Immune_desert	progenitor	Classical	Classical	Absent	Pure classical	Nonimmune Class
exp_tcga_TCGA-RB-A7B8-01A	Immune_desert	immunogenic	QM_PDA	Classical	Activated	Pure classical	Immune Class
exp_tcga_TCGA-S4-A8RM-01A	Immune_desert	progenitor	Classical	Classical	Normal	Pure classical	Nonimmune Class
exp_tcga_TCGA-S4-A8RO-01A	Immune_desert	progenitor	QM_PDA	Basel_like	Normal	Pure classical	Nonimmune Class
exp_tcga_TCGA-S4-A8RP-01A	Immune_desert	progenitor	Exocrine_like	Classical	Activated	Pure classical	Nonimmune Class
exp_tcga_TCGA-US-A776-01A	Immune_desert	progenitor	Classical	Classical	Normal	Pure classical	Immune Class
exp_tcga_TCGA-US-A779-01A	Immune_desert	progenitor	Classical	Classical	Normal	Pure classical	Immune Class
exp_tcga_TCGA-US-A77E-01A	Immune_desert	progenitor	Classical	Classical	Activated	Pure classical	Immune Class
exp_tcga_TCGA-US-A77G-01A	Immune_desert	progenitor	Exocrine_like	Classical	Normal	Pure classical	Nonimmune Class
exp_tcga_TCGA-XD-AAUL-01A	Immune_desert	ADEX	Exocrine_like	Basel_like	Activated	Stroma Activated	Nonimmune Class
exp_tcga_TCGA-YH-A8SY-01A	Immune_desert	ADEX	QM_PDA	Basel_like	Activated	Stroma Activated	Nonimmune Class
exp_tcga_TCGA-YY-A8LH-01A	Immune_desert	progenitor	Classical	Classical	Normal	Pure classical	Immune Class
exp_cell_C3N-01012	Immune_desert	squamous	Exocrine_like	Classical	Normal	Pure classical	Nonimmune Class
exp_cell_C3L-01054	Immune_desert	squamous	Exocrine_like	Classical	Normal	Pure classical	Nonimmune Class
exp_cell_C3N-04284	Immune_desert	squamous	Exocrine_like	Classical	Normal	Immune classical	Nonimmune Class
exp_cell_C3L-01036	Immune_desert	progenitor	Exocrine_like	Classical	Normal	Pure classical	Nonimmune Class
exp_cell_C3N-03426	Immune_desert	immunogenic	Classical	Classical	Absent	Pure classical	Immune Class
exp_cell_C3L-03388	Immune_desert	ADEX	QM_PDA	Classical	Activated	Pure classical	Immune Class
exp_cell_C3L-01124	Immune_desert	progenitor	Classical	Classical	Normal	Pure classical	Immune Class
exp_cell_C3N-03173	Immune_desert	squamous	Exocrine_like	Classical	Normal	Pure classical	Nonimmune Class
exp_cell_C3L-04475	Immune_desert	progenitor	QM_PDA	Basel_like	Activated	Pure classical	Nonimmune Class
exp_cell_C3L-04853	Immune_desert	squamous	Exocrine_like	Basel_like	Absent	Stroma Activated	Nonimmune Class
exp_cell_C3L-02115	Immune_desert	squamous	Exocrine_like	Classical	Normal	Immune classical	Nonimmune Class
exp_cell_C3L-02701	Immune_desert	ADEX	Classical	Basel_like	Activated	Stroma Activated	Nonimmune Class
exp_cell_C3L-00622	Immune_desert	squamous	Exocrine_like	Basel_like	Activated	Stroma Activated	Nonimmune Class
exp_cell_C3N-01381	Immune_desert	squamous	Exocrine_like	Basel_like	Normal	Stroma Activated	Nonimmune Class
exp_cell_C3L-02118	Immune_desert	progenitor	Exocrine_like	Basel_like	Absent	Pure classical	Immune Class
exp_cell_C3L-01637	Immune_desert	progenitor	Exocrine_like	Classical	Normal	Pure classical	Immune Class
exp_cell_C3N-04119	Immune_desert	ADEX	QM_PDA	Basel_like	Activated	Stroma Activated	Nonimmune Class
exp_cell_C3N-02573	Immune_desert	squamous	Exocrine_like	Basel_like	Activated	Stroma Activated	Nonimmune Class
exp_cell_C3L-00819	Immune_desert	ADEX	QM_PDA	Basel_like	Activated	Stroma Activated	Nonimmune Class
exp_cell_C3L-02606	Immune_desert	ADEX	QM_PDA	Basel_like	Activated	pure basal-like	Nonimmune Class
exp_cell_C3L-02897	Immune_desert	ADEX	Exocrine_like	Basel_like	Absent	Stroma Activated	Immune Class
exp_cell_C3L-01687	Immune_desert	squamous	Exocrine_like	Classical	Normal	Pure classical	Immune Class
exp_cell_C3L-04080	Immune_desert	squamous	Exocrine_like	Basel_like	Normal	Desmoplastic	Immune Class
exp_cell_C3N-03853	Immune_desert	squamous	Exocrine_like	Basel_like	Activated	Stroma Activated	Nonimmune Class
exp_cell_C3N-04283	Immune_desert	ADEX	QM_PDA	Basel_like	Activated	pure basal-like	Nonimmune Class
exp_cell_C3L-02109	Immune_desert	ADEX	QM_PDA	Basel_like	Activated	Stroma Activated	Nonimmune Class
exp_cell_C3L-03630	Immune_desert	progenitor	Exocrine_like	Classical	Activated	Pure classical	Nonimmune Class
exp_cell_C3L-01662	Immune_desert	progenitor	Exocrine_like	Classical	Absent	Pure classical	Nonimmune Class
exp_cell_C3N-03007	Immune_desert	ADEX	QM_PDA	Basel_like	Activated	Stroma Activated	Nonimmune Class
exp_cell_C3N-03665	Immune_desert	progenitor	Exocrine_like	Classical	Normal	Pure classical	Immune Class
exp_cell_C3L-00599	Immune_desert	progenitor	Exocrine_like	Classical	Normal	Pure classical	Immune Class
exp_cell_C3L-01051	Immune_desert	squamous	Exocrine_like	Classical	Absent	Pure classical	Nonimmune Class
exp_cell_C3N-03839	Immune_desert	progenitor	Classical	Classical	Normal	Pure classical	Nonimmune Class
exp_cell_C3L-04479	Immune_desert	progenitor	QM_PDA	Classical	Absent	Pure classical	Immune Class
exp_cell_C3L-00625	Immune_desert	progenitor	Classical	Classical	Activated	Pure classical	Nonimmune Class
exp_cell_C3N-03754	Immune_desert	squamous	Exocrine_like	Classical	Absent	Stroma Activated	Nonimmune Class
exp_cell_C3L-01037	Immune_desert	ADEX	Exocrine_like	Basel_like	Absent	pure basal-like	Nonimmune Class
exp_cell_C3N-03666	Immune_desert	progenitor	Classical	Classical	Activated	Pure classical	Nonimmune Class
exp_cell_C3L-00017	Immune_desert	progenitor	Classical	Classical	Normal	Pure classical	Immune Class
exp_cell_C3L-01689	Immune_desert	ADEX	QM_PDA	Basel_like	Activated	Stroma Activated	Nonimmune Class
exp_cell_C3N-02585	Immune_desert	ADEX	QM_PDA	Basel_like	Absent	Stroma Activated	Immune Class
exp_cell_C3N-03086	Immune_desert	progenitor	Exocrine_like	Classical	Activated	Pure classical	Nonimmune Class
exp_cell_C3L-02463	Immune_desert	progenitor	Classical	Classical	Normal	Pure classical	Immune Class
exp_cell_C3N-00249	Immune_desert	progenitor	Classical	Classical	Normal	Pure classical	Immune Class
exp_cell_C3L-00589	Immune_desert	progenitor	Exocrine_like	Classical	Absent	Pure classical	Nonimmune Class
exp_cell_C3N-00302	Immune_desert	ADEX	QM_PDA	Basel_like	Normal	pure basal-like	Nonimmune Class
exp_cell_C3N-00511	Immune_desert	progenitor	Classical	Classical	Normal	Pure classical	Nonimmune Class
exp_cell_C3N-03190	Immune_desert	squamous	Exocrine_like	Basel_like	Normal	Stroma Activated	Nonimmune Class
exp_cell_C3N-00516	Immune_desert	ADEX	QM_PDA	Basel_like	Activated	pure basal-like	Immune Class
exp_cell_C3L-02610	Immune_desert	squamous	Exocrine_like	Basel_like	Activated	Stroma Activated	Immune Class
exp_cell_C3N-02579	Immune_desert	ADEX	Exocrine_like	Basel_like	Activated	Stroma Activated	Nonimmune Class
exp_cell_C3N-03000	Immune_desert	ADEX	QM_PDA	Basel_like	Activated	pure basal-like	Nonimmune Class
exp_cell_C3L-00598	Immune_desert	ADEX	QM_PDA	Basel_like	Absent	pure basal-like	Immune Class
exp_cell_C3N-03430	Immune_desert	ADEX	QM_PDA	Basel_like	Activated	Stroma Activated	Nonimmune Class
exp_cell_C3L-02809	Immune_desert	progenitor	Classical	Classical	Normal	Stroma Activated	Nonimmune Class
exp_cell_C3N-02768	Immune_desert	ADEX	Exocrine_like	Basel_like	Activated	pure basal-like	Immune Class
exp_cell_C3N-02010	Immune_desert	progenitor	Classical	Classical	Absent	Pure classical	Immune Class
exp_cell_C3L-01031	Immune_desert	progenitor	Classical	Classical	Activated	Pure classical	Nonimmune Class
exp_cell_C3N-01167	Immune_desert	progenitor	Classical	Classical	Normal	Pure classical	Nonimmune Class
exp_cell_C3L-02604	Immune_desert	ADEX	Classical	Classical	Activated	Pure classical	Nonimmune Class
exp_cell_C3L-00277	Immune_desert	progenitor	Classical	Classical	Activated	Pure classical	Nonimmune Class
exp_cell_C3L-03639	Immune_desert	ADEX	QM_PDA	Basel_like	Normal	pure basal-like	Nonimmune Class
exp_cell_C3N-04282	Immune_desert	ADEX	QM_PDA	Basel_like	Activated	pure basal-like	Nonimmune Class
exp_cell_C3L-04072	Immune_desert	ADEX	Exocrine_like	Basel_like	Absent	pure basal-like	Nonimmune Class
exp_cell_C3L-02613	Immune_desert	ADEX	QM_PDA	Basel_like	Absent	pure basal-like	Nonimmune Class
exp_tcga_TCGA-2J-AAB9-01A	Immune_rich	squamous	Exocrine_like	Basel_like	Normal	Stroma Activated	Immune Class
exp_tcga_TCGA-2J-AABF-01A	Immune_rich	squamous	Exocrine_like	Classical	Normal	Pure classical	Nonimmune Class
exp_tcga_TCGA-2J-AABR-01A	Immune_rich	squamous	Exocrine_like	Basel_like	Normal	Desmoplastic	Immune Class
exp_tcga_TCGA-2J-AABT-01A	Immune_rich	immunogenic	QM_PDA	Classical	Absent	Immune classical	Nonimmune Class
exp_tcga_TCGA-3A-A9IB-01A	Immune_rich	ADEX	Exocrine_like	Basel_like	Absent	Stroma Activated	Nonimmune Class
exp_tcga_TCGA-3A-A9IX-01A	Immune_rich	squamous	Exocrine_like	Basel_like	Normal	Desmoplastic	Immune Class
exp_tcga_TCGA-3E-AAAY-01A	Immune_rich	squamous	Exocrine_like	Classical	Normal	Immune classical	Immune Class
exp_tcga_TCGA-F2-A44H-01A	Immune_rich	squamous	Exocrine_like	Classical	Activated	Desmoplastic	Nonimmune Class
exp_tcga_TCGA-F2-A7TX-01A	Immune_rich	squamous	Exocrine_like	Basel_like	Normal	pure basal-like	Immune Class
exp_tcga_TCGA-FB-A4P5-01A	Immune_rich	immunogenic	Exocrine_like	Basel_like	Normal	Desmoplastic	Immune Class
exp_tcga_TCGA-FB-A4P6-01A	Immune_rich	squamous	Exocrine_like	Classical	Normal	Immune classical	Nonimmune Class
exp_tcga_TCGA-FB-A5VM-01A	Immune_rich	ADEX	QM_PDA	Basel_like	Normal	pure basal-like	Immune Class
exp_tcga_TCGA-FB-AAPS-01A	Immune_rich	immunogenic	Exocrine_like	Basel_like	Activated	Desmoplastic	Immune Class
exp_tcga_TCGA-FB-AAPY-01A	Immune_rich	squamous	Exocrine_like	Classical	Normal	Pure classical	Immune Class
exp_tcga_TCGA-FB-AAPZ-01A	Immune_rich	ADEX	Exocrine_like	Basel_like	Absent	Stroma Activated	Immune Class
exp_tcga_TCGA-H6-A45N-01A	Immune_rich	squamous	Exocrine_like	Classical	Activated	Immune classical	Immune Class
exp_tcga_TCGA-HV-A5A5-01A	Immune_rich	squamous	Exocrine_like	Classical	Activated	Pure classical	Nonimmune Class
exp_tcga_TCGA-HZ-7922-01A	Immune_rich	ADEX	Exocrine_like	Classical	Activated	Stroma Activated	Immune Class
exp_tcga_TCGA-HZ-7925-01A	Immune_rich	ADEX	QM_PDA	Basel_like	Activated	Desmoplastic	Nonimmune Class
exp_tcga_TCGA-HZ-7926-01A	Immune_rich	squamous	Exocrine_like	Classical	Normal	Pure classical	Immune Class
exp_tcga_TCGA-HZ-8001-01A	Immune_rich	immunogenic	QM_PDA	Basel_like	Normal	Desmoplastic	Immune Class
exp_tcga_TCGA-HZ-8002-01A	Immune_rich	squamous	Exocrine_like	Classical	Normal	Desmoplastic	Immune Class
exp_tcga_TCGA-HZ-8003-01A	Immune_rich	squamous	Exocrine_like	Classical	Normal	Desmoplastic	Immune Class
exp_tcga_TCGA-HZ-8005-01A	Immune_rich	ADEX	QM_PDA	Basel_like	Activated	pure basal-like	Nonimmune Class
exp_tcga_TCGA-HZ-8315-01A	Immune_rich	immunogenic	Exocrine_like	Classical	Activated	Stroma Activated	Nonimmune Class
exp_tcga_TCGA-HZ-8317-01A	Immune_rich	squamous	Exocrine_like	Basel_like	Absent	Immune classical	Immune Class
exp_tcga_TCGA-HZ-8519-01A	Immune_rich	squamous	QM_PDA	Classical	Normal	Desmoplastic	Immune Class
exp_tcga_TCGA-HZ-8636-01A	Immune_rich	ADEX	QM_PDA	Classical	Activated	Stroma Activated	Nonimmune Class
exp_tcga_TCGA-HZ-8637-01A	Immune_rich	immunogenic	QM_PDA	Classical	Normal	Immune classical	Immune Class
exp_tcga_TCGA-HZ-A49G-01A	Immune_rich	squamous	Exocrine_like	Classical	Activated	Immune classical	Nonimmune Class
exp_tcga_TCGA-HZ-A49H-01A	Immune_rich	squamous	Exocrine_like	Classical	Normal	Immune classical	Immune Class
exp_tcga_TCGA-HZ-A4BH-01A	Immune_rich	immunogenic	Classical	Basel_like	Normal	Stroma Activated	Immune Class
exp_tcga_TCGA-HZ-A77P-01A	Immune_rich	squamous	Exocrine_like	Classical	Absent	Immune classical	Nonimmune Class
exp_tcga_TCGA-HZ-A77Q-01A	Immune_rich	immunogenic	QM_PDA	Basel_like	Absent	Desmoplastic	Immune Class
exp_tcga_TCGA-IB-7645-01A	Immune_rich	immunogenic	Classical	Classical	Normal	Desmoplastic	Immune Class
exp_tcga_TCGA-IB-7646-01A	Immune_rich	ADEX	QM_PDA	Basel_like	Activated	pure basal-like	Nonimmune Class
exp_tcga_TCGA-IB-7649-01A	Immune_rich	squamous	Exocrine_like	Classical	Activated	Immune classical	Nonimmune Class
exp_tcga_TCGA-IB-7651-01A	Immune_rich	immunogenic	Exocrine_like	Classical	Activated	Stroma Activated	Nonimmune Class
exp_tcga_TCGA-IB-7652-01A	Immune_rich	squamous	Exocrine_like	Classical	Activated	Immune classical	Nonimmune Class
exp_tcga_TCGA-IB-7885-01A	Immune_rich	ADEX	QM_PDA	Basel_like	Activated	Stroma Activated	Immune Class
exp_tcga_TCGA-IB-7886-01A	Immune_rich	ADEX	Classical	Classical	Activated	Pure classical	Nonimmune Class
exp_tcga_TCGA-IB-7888-01A	Immune_rich	immunogenic	Classical	Classical	Normal	Immune classical	Immune Class
exp_tcga_TCGA-IB-7889-01A	Immune_rich	squamous	Exocrine_like	Basel_like	Normal	Stroma Activated	Immune Class
exp_tcga_TCGA-IB-7890-01A	Immune_rich	ADEX	QM_PDA	Basel_like	Activated	Stroma Activated	Nonimmune Class
exp_tcga_TCGA-IB-7891-01A	Immune_rich	squamous	Exocrine_like	Classical	Activated	Immune classical	Immune Class
exp_tcga_TCGA-IB-7893-01A	Immune_rich	ADEX	QM_PDA	Basel_like	Activated	Stroma Activated	Nonimmune Class
exp_tcga_TCGA-IB-7897-01A	Immune_rich	immunogenic	QM_PDA	Basel_like	Normal	Desmoplastic	Immune Class
exp_tcga_TCGA-IB-8126-01A	Immune_rich	squamous	Exocrine_like	Classical	Normal	Desmoplastic	Immune Class
exp_tcga_TCGA-IB-8127-01A	Immune_rich	ADEX	Exocrine_like	Classical	Activated	Stroma Activated	Nonimmune Class
exp_tcga_TCGA-IB-A5SO-01A	Immune_rich	immunogenic	Classical	Classical	Activated	Stroma Activated	Immune Class
exp_tcga_TCGA-IB-A5SQ-01A	Immune_rich	immunogenic	QM_PDA	Basel_like	Activated	Desmoplastic	Immune Class
exp_tcga_TCGA-IB-A5SS-01A	Immune_rich	ADEX	QM_PDA	Basel_like	Activated	pure basal-like	Nonimmune Class
exp_tcga_TCGA-IB-A5ST-01A	Immune_rich	immunogenic	Classical	Classical	Normal	Desmoplastic	Immune Class
exp_tcga_TCGA-IB-AAUM-01A	Immune_rich	squamous	Exocrine_like	Classical	Normal	Immune classical	Immune Class
exp_tcga_TCGA-IB-AAUP-01A	Immune_rich	immunogenic	QM_PDA	Classical	Activated	Desmoplastic	Immune Class
exp_tcga_TCGA-IB-AAUR-01A	Immune_rich	immunogenic	QM_PDA	Basel_like	Normal	Desmoplastic	Immune Class
exp_tcga_TCGA-IB-AAUS-01A	Immune_rich	immunogenic	Exocrine_like	Basel_like	Activated	Desmoplastic	Nonimmune Class
exp_tcga_TCGA-IB-AAUT-01A	Immune_rich	squamous	Exocrine_like	Classical	Activated	Immune classical	Immune Class
exp_tcga_TCGA-LB-A9Q5-01A	Immune_rich	squamous	Exocrine_like	Basel_like	Normal	Stroma Activated	Nonimmune Class
exp_tcga_TCGA-Q3-A5QY-01A	Immune_rich	immunogenic	QM_PDA	Basel_like	Normal	Desmoplastic	Immune Class
exp_tcga_TCGA-RB-AA9M-01A	Immune_rich	squamous	Classical	Basel_like	Normal	Stroma Activated	Immune Class
exp_tcga_TCGA-US-A774-01A	Immune_rich	squamous	Exocrine_like	Classical	Activated	Stroma Activated	Immune Class
exp_tcga_TCGA-XD-AAUG-01A	Immune_rich	immunogenic	Exocrine_like	Classical	Activated	Desmoplastic	Immune Class
exp_tcga_TCGA-XD-AAUH-01A	Immune_rich	immunogenic	QM_PDA	Basel_like	Normal	Desmoplastic	Immune Class
exp_tcga_TCGA-XD-AAUI-01A	Immune_rich	immunogenic	Exocrine_like	Basel_like	Normal	Stroma Activated	Immune Class
exp_tcga_TCGA-XN-A8T3-01A	Immune_rich	ADEX	Exocrine_like	Basel_like	Activated	Stroma Activated	Nonimmune Class
exp_tcga_TCGA-XN-A8T5-01A	Immune_rich	immunogenic	QM_PDA	Basel_like	Normal	Desmoplastic	Immune Class
exp_tcga_TCGA-YB-A89D-01A	Immune_rich	immunogenic	Classical	Classical	Activated	Stroma Activated	Nonimmune Class
exp_tcga_TCGA-Z5-AAPL-01A	Immune_rich	immunogenic	QM_PDA	Classical	Absent	Desmoplastic	Immune Class
exp_cell_C3L-03394	Immune_rich	squamous	Exocrine_like	Classical	Normal	Desmoplastic	Immune Class
exp_cell_C3N-03428	Immune_rich	immunogenic	Classical	Classical	Absent	Immune classical	Immune Class
exp_cell_C3L-02112	Immune_rich	squamous	Exocrine_like	Classical	Normal	Immune classical	Immune Class
exp_cell_C3N-01719	Immune_rich	immunogenic	QM_PDA	Classical	Normal	Desmoplastic	Immune Class
exp_cell_C3N-03670	Immune_rich	squamous	Exocrine_like	Classical	Normal	Desmoplastic	Immune Class
exp_cell_C3N-02998	Immune_rich	immunogenic	QM_PDA	Classical	Normal	Immune classical	Immune Class
exp_cell_C3N-03211	Immune_rich	squamous	Exocrine_like	Classical	Normal	Immune classical	Immune Class
exp_cell_C3L-01052	Immune_rich	squamous	Exocrine_like	Classical	Normal	Desmoplastic	Immune Class
exp_cell_C3N-00512	Immune_rich	squamous	Exocrine_like	Classical	Normal	Immune classical	Immune Class
exp_cell_C3N-02295	Immune_rich	squamous	Exocrine_like	Classical	Normal	Desmoplastic	Immune Class
exp_cell_C3N-01502	Immune_rich	immunogenic	QM_PDA	Classical	Normal	Desmoplastic	Immune Class
exp_cell_C3L-01053	Immune_rich	squamous	Exocrine_like	Classical	Normal	Desmoplastic	Nonimmune Class
exp_cell_C3L-03632	Immune_rich	squamous	Exocrine_like	Classical	Normal	Immune classical	Immune Class
exp_cell_C3L-00401	Immune_rich	immunogenic	Exocrine_like	Basel_like	Activated	Stroma Activated	Immune Class
exp_cell_C3N-00517	Immune_rich	squamous	Exocrine_like	Classical	Normal	Immune classical	Immune Class
exp_cell_C3N-03440	Immune_rich	squamous	Exocrine_like	Classical	Absent	Desmoplastic	Nonimmune Class
exp_cell_C3L-04495	Immune_rich	squamous	Exocrine_like	Basel_like	Activated	Immune classical	Immune Class
exp_cell_C3N-00957	Immune_rich	immunogenic	Classical	Classical	Normal	Immune classical	Immune Class
exp_cell_C3N-00303	Immune_rich	immunogenic	QM_PDA	Basel_like	Normal	Desmoplastic	Immune Class
exp_cell_C3N-00513	Immune_rich	squamous	Exocrine_like	Basel_like	Normal	Desmoplastic	Nonimmune Class
exp_cell_C3N-01166	Immune_rich	squamous	Exocrine_like	Classical	Normal	Immune classical	Immune Class
exp_cell_C3N-01382	Immune_rich	squamous	Exocrine_like	Basel_like	Absent	Stroma Activated	Nonimmune Class
exp_cell_C3N-01011	Immune_rich	squamous	Exocrine_like	Classical	Normal	Immune classical	Immune Class
exp_cell_C3L-04473	Immune_rich	squamous	Exocrine_like	Basel_like	Normal	Desmoplastic	Immune Class
exp_cell_C3N-01997	Immune_rich	squamous	Exocrine_like	Classical	Normal	Immune classical	Nonimmune Class
exp_cell_C3L-00640	Immune_rich	immunogenic	Classical	Classical	Activated	Pure classical	Immune Class
exp_cell_C3L-00189	Immune_rich	immunogenic	QM_PDA	Basel_like	Absent	Desmoplastic	Immune Class
exp_cell_C3N-01998	Immune_rich	squamous	Exocrine_like	Classical	Normal	Pure classical	Immune Class
exp_cell_C3L-00881	Immune_rich	squamous	Exocrine_like	Classical	Normal	Desmoplastic	Immune Class
exp_cell_C3N-01715	Immune_rich	immunogenic	QM_PDA	Basel_like	Normal	pure basal-like	Immune Class
exp_cell_C3N-00198	Immune_rich	immunogenic	Classical	Classical	Normal	Immune classical	Immune Class
exp_cell_C3N-01380	Immune_rich	immunogenic	Exocrine_like	Classical	Normal	Desmoplastic	Immune Class
exp_cell_C3N-01388	Immune_rich	ADEX	Exocrine_like	Basel_like	Activated	Stroma Activated	Nonimmune Class
exp_cell_C3N-02589	Immune_rich	squamous	Exocrine_like	Classical	Normal	Immune classical	Nonimmune Class
exp_cell_C3L-03356	Immune_rich	progenitor	Classical	Basel_like	Normal	Pure classical	Immune Class
exp_cell_C3N-02944	Immune_rich	immunogenic	Classical	Basel_like	Normal	Stroma Activated	Immune Class
exp_cell_C3N-00436	Immune_rich	ADEX	QM_PDA	Basel_like	Absent	Stroma Activated	Nonimmune Class
exp_cell_C3L-00928	Immune_rich	immunogenic	Classical	Classical	Activated	Pure classical	Immune Class
exp_cell_C3N-02592	Immune_rich	immunogenic	QM_PDA	Basel_like	Absent	Desmoplastic	Immune Class
exp_cell_C3N-01383	Immune_rich	ADEX	Classical	Basel_like	Activated	Stroma Activated	Immune Class
exp_cell_C3N-03439	Immune_rich	immunogenic	Classical	Classical	Normal	Pure classical	Immune Class
exp_cell_C3N-03006	Immune_rich	squamous	Exocrine_like	Classical	Normal	Immune classical	Immune Class
exp_cell_C3N-01165	Immune_rich	ADEX	Exocrine_like	Basel_like	Absent	Stroma Activated	Nonimmune Class
exp_cell_C3L-00102	Immune_rich	immunogenic	QM_PDA	Classical	Normal	Stroma Activated	Immune Class
exp_cell_C3N-01375	Immune_rich	ADEX	QM_PDA	Basel_like	Activated	Stroma Activated	Nonimmune Class
exp_cell_C3N-03884	Immune_rich	ADEX	QM_PDA	Basel_like	Activated	pure basal-like	Nonimmune Class
exp_cell_C3N-01168	Immune_rich	squamous	Exocrine_like	Classical	Normal	Pure classical	Nonimmune Class
exp_cell_C3L-01703	Immune_rich	squamous	Classical	Classical	Normal	Immune classical	Immune Class
exp_cell_C3L-03628	Immune_rich	squamous	Exocrine_like	Classical	Activated	Stroma Activated	Immune Class
exp_cell_C3N-03780	Immune_rich	squamous	Exocrine_like	Classical	Normal	Pure classical	Immune Class
exp_cell_C3L-02899	Immune_rich	ADEX	Exocrine_like	Basel_like	Activated	Stroma Activated	Nonimmune Class
exp_cell_C3N-02971	Immune_rich	immunogenic	QM_PDA	Classical	Normal	Desmoplastic	Immune Class
exp_cell_C3N-01714	Immune_rich	immunogenic	QM_PDA	Basel_like	Absent	Stroma Activated	Immune Class
exp_cell_C3L-02890	Immune_rich	squamous	Exocrine_like	Basel_like	Activated	Desmoplastic	Immune Class
exp_cell_C3L-02116	Immune_rich	immunogenic	Classical	Classical	Normal	Pure classical	Immune Class
exp_cell_C3L-01453	Immune_rich	immunogenic	QM_PDA	Basel_like	Activated	Desmoplastic	Immune Class
exp_cell_C3L-03635	Immune_rich	ADEX	QM_PDA	Basel_like	Activated	Stroma Activated	Immune Class
exp_cell_C3N-00518	Immune_rich	ADEX	Exocrine_like	Basel_like	Activated	Stroma Activated	Nonimmune Class
exp_cell_C3N-03840	Immune_rich	squamous	Exocrine_like	Basel_like	Activated	Stroma Activated	Immune Class
exp_cell_C3N-03061	Immune_rich	ADEX	Exocrine_like	Basel_like	Activated	Stroma Activated	Nonimmune Class
exp_cell_C3L-04848	Immune_rich	immunogenic	Classical	Classical	Normal	Immune classical	Immune Class
exp_cell_C3N-00514	Immune_rich	ADEX	QM_PDA	Basel_like	Activated	Desmoplastic	Immune Class
exp_cell_C3N-02940	Immune_rich	progenitor	Exocrine_like	Classical	Normal	Pure classical	Immune Class
exp_cell_C3L-01598	Immune_rich	ADEX	QM_PDA	Basel_like	Activated	Stroma Activated	Nonimmune Class
exp_cell_C3N-01716	Immune_rich	ADEX	Exocrine_like	Basel_like	Normal	pure basal-like	Nonimmune Class
exp_cell_C3N-04126	Immune_rich	immunogenic	Exocrine_like	Basel_like	Activated	Stroma Activated	Immune Class
exp_cell_C3L-04027	Immune_rich	ADEX	Exocrine_like	Basel_like	Activated	pure basal-like	Nonimmune Class
exp_cell_C3L-03123	Immune_rich	immunogenic	QM_PDA	Classical	Activated	Pure classical	Immune Class
exp_cell_C3L-01971	Immune_rich	squamous	Exocrine_like	Classical	Normal	Immune classical	Immune Class
exp_cell_C3L-01328	Immune_rich	ADEX	QM_PDA	Basel_like	Absent	pure basal-like	Nonimmune Class
